# Supplementary material for: Recent advances in the development of portable technologies and commercial products to detect Δ9-tetrahydrocannabinol in biofluids: a systematic review
Source: J Cannabis Res. 2024 Feb 27;6:9. doi: 10.1186/s42238-024-00216-0 (PMC10898188; doi:10.1186/s42238-024-00216-0)
Supplement: Supplementary file 1 — Additional file 1. Search methodology. [file 42238_2024_216_MOESM1_ESM.xlsx]

## Sheet: Search Strategy
		Topic:	Literature search on THC sensing technologies
		Objective:	What new/innovative sensing technologies have been discussed in the literature, based on searches for analytes, biofluids, and types of sensor
		Notes:	Analyte: THC detection, tetrahydrocannabinol detection, cannabinoids detection
			Biofluid: saliva, oral fluid, blood, sweat, breath, urine (we kept urine as some technologies developed can be interesting to analyze)
			Type of sensor: electrochemical sensor, optical sensor, bioassay, biosensor, field-effect transistor, aptasensor
			Headings for data extraction: detection technique, sensing layer composition, concentration range, sensitivity, selectivity, limit of detection, limit of quantification, detection time, reusability, robustness (pH, biofouling, temperature, chemicals), which body fluid tested
		Analyte
		MeSH Term:	Dronabinol
		Keywords:	Dronabinol, THC, tetrahydrocannabinol, Δ-9-tetrahydrocannabinol, cannabinoids
		MeSH Terms:	Substance Abuse Detection
			detection, concentration, level, monitoring, screening, quantification, quantitative, measurement, sensing, measure
		Biofluid
		MeSH Terms:	Blood, Urine, Saliva, Sputum, Sweat
		Keywords:	saliva, oral fluid, blood, sweat, breath, urine
		Sensor Type
		MeSH Terms:	Biological Assay, Clinical Chemistry Tests
		Keywords:	electrochemical sensor, optical sensor, bioassay, biosensor, field-effect transistor, aptasensor, immunoassay, immunosensor, spectroelectrochemical, chromatography
		Limits:	English, since 2017
		Databases:	PubMed, Scopus, Google Scholar
		PubMed Search:	Analyte (AND Detection) AND Sensor Type, without publication type limits, limit to 2017-
		Search (PubMed syntax):	((Dronabinol OR *THC OR *tetrahydrocannabinol) OR (Dronabinol[MeSH Terms])) AND ((detection OR concentration OR level OR monitoring OR screening OR quantification OR quantitative OR measure* OR sensing OR isolation OR determination) OR (electrochemical OR "optical sensor" OR bioassay* OR biosensor OR "field-effect transistor" OR aptasensor OR immunoassay* OR immunosensor OR spectroelectrochemical…
		PubMed (2023-03-20):	3892	Filtered:	118
		Scoupus Search:	No MeSH Terms, Added AND NOT("synthetic")
		Search (Scopus syntax):	TITLE-ABS(Dronabinol OR *THC OR *tetrahydrocannabinol) AND TITLE-ABS((detection OR concentration OR level OR monitoring OR screening OR quantification OR quantitative OR measure* OR sensing OR isolation OR determination) OR (electrochemical OR "optical sensor" OR "optical sensor "OR bioassay* OR biosensor* OR "field-effect transistor" OR "field-effect transistors" OR aptasensor* OR immunoassay* O…
		Limits applied:	2017; Source type: Journal; Document type: Article, Review, Conference paper, Data paper; Language: English
		Scopus (2023-03-29):	2441	Filtered:	41
		Google Scholar Search:	Analyte (AND Detection) AND Sensor Type
		Search (Google Scholar syntax):	(Dronabinol OR *THC OR *tetrahydrocannabinol) AND (detection OR concentration OR level OR monitoring OR screening OR quantification OR quantitative OR measure* OR sensing OR isolation OR determination) OR (electrochemical OR "optical sensor" OR "optical sensor "OR bioassay* OR biosensor* OR "field-effect transistor" OR "field-effect transistors" OR aptasensor* OR immunoassay* OR immunosensor* OR …
		Limits applied:	2017
		Google Scholar (2023-03-31):	2560	Filtered:	30
		Reasons for exclusions:	Not a report of detection/quantification
			Evaluation of a testing program or site/context
			Detection not in biofluid (includes detection in wastewater and other environmental detection, animal studies, quantification in cannabis-derived products, laboratory/simulated samples etc)
			Synthetic cannabinoids
			Wrong publication type (report/letter with no data)
			Post-mortem analysis
			Other body fluids (breast milk, semen)
			Duplicate
	Exploratory initial PubMed searches only listed below
		Component search 1:	Analyte
		Search (PubMed syntax):	((Dronabinol or THC or tetrahydrocannabinol or cannabinoids) OR (Dronabinol[MeSH Terms]) AND ((clinicaltrial[Filter] OR meta-analysis[Filter] OR randomizedcontrolledtrial[Filter] OR systematicreview[Filter]) AND (humans[Filter]) AND (english[Filter]) AND (2017:2023[pdat]))) AND (detection or concentration or level AND ((clinicaltrial[Filter] OR meta-analysis[Filter] OR randomizedcontrolledtrial[F…
		PubMed (2023-03-20):	273
		Component search 1a:	Analyte, without "detection"
		Search (PubMed syntax):	(Dronabinol or THC or tetrahydrocannabinol or cannabinoids) OR (Dronabinol[MeSH Terms])
		PubMed (2023-03-20):	730
		Component search 1b:	Analyte, without publication type limits
		Search (PubMed syntax):	((Dronabinol or THC or tetrahydrocannabinol or cannabinoids) OR (Dronabinol[MeSH Terms])) AND (detection or concentration or level)
		PubMed (2023-03-20):	2623
		Component search 2:	Biofluid
		Search (PubMed syntax):	(blood or saliva or urine or sputum or sweat[MeSH Terms] AND ((clinicaltrial[Filter] OR meta-analysis[Filter] OR randomizedcontrolledtrial[Filter] OR systematicreview[Filter]) AND (humans[Filter]) AND (english[Filter]))) OR (saliva or "oral fluid" or blood or sweat or breath or urine AND ((clinicaltrial[Filter] OR meta-analysis[Filter] OR randomizedcontrolledtrial[Filter] OR systematicreview[Filt…
		PubMed (2023-03-20):	87640
		Component search 2a:	Biofluid, without publication type limits
		Search (PubMed syntax):	(blood or saliva or urine or sputum or sweat[MeSH Terms]) OR (saliva or "oral fluid" or blood or sweat or breath or urine)
		PubMed (2023-03-20):	816052
		Component search 3:	Sensor Type
		Search (PubMed syntax):	("electrochemical sensor" or "optical sensor" or bioassay or biosensor or "field-effect transistor" or aptasensor AND ((clinicaltrial[Filter] OR meta-analysis[Filter] OR randomizedcontrolledtrial[Filter] OR systematicreview[Filter]) AND (humans[Filter]) AND (english[Filter]))) OR ("Biological Assay" or "Clinical Chemistry Tests"[MeSH Terms] AND ((clinicaltrial[Filter] OR meta-analysis[Filter] OR …
		PubMed (2023-03-20):	2735
		Component search 4:	Sensor Type, without publication type limits
		Search (PubMed syntax):	("electrochemical sensor" or "optical sensor" or bioassay or biosensor or "field-effect transistor" or aptasensor) OR ("Biological Assay" or "Clinical Chemistry Tests"[MeSH Terms])
		PubMed (2023-03-20):	57724
		Scoping Search 1:	Analyte (AND Detection) AND Biofluid AND Sensor Type
		Search (PubMed syntax):	((((Dronabinol or THC or tetrahydrocannabinol or cannabinoids) OR (Dronabinol[MeSH Terms]) AND ((clinicaltrial[Filter] OR meta-analysis[Filter] OR randomizedcontrolledtrial[Filter] OR systematicreview[Filter]) AND (humans[Filter]) AND (english[Filter]) AND (2017:2023[pdat]))) AND (detection or concentration or level AND ((clinicaltrial[Filter] OR meta-analysis[Filter] OR randomizedcontrolledtrial…
		PubMed (2023-03-20):	3
		Scoping Search 1a:	Analyte AND Biofluid AND Sensor Type
		Search (PubMed syntax):	(((Dronabinol or THC or tetrahydrocannabinol or cannabinoids) OR (Dronabinol[MeSH Terms]) AND ((clinicaltrial[Filter] OR meta-analysis[Filter] OR randomizedcontrolledtrial[Filter] OR systematicreview[Filter]) AND (humans[Filter]) AND (english[Filter]) AND (2017:2023[pdat]))) AND ((blood or saliva or urine or sputum or sweat[MeSH Terms] AND ((clinicaltrial[Filter] OR meta-analysis[Filter] OR rando…
		PubMed (2023-03-20):	3
		Scoping Search 2:	Analyte (AND Detection) AND Biofluid
		Search (PubMed syntax):	(((Dronabinol or THC or tetrahydrocannabinol or cannabinoids) OR (Dronabinol[MeSH Terms]) AND ((clinicaltrial[Filter] OR meta-analysis[Filter] OR randomizedcontrolledtrial[Filter] OR systematicreview[Filter]) AND (humans[Filter]) AND (english[Filter]) AND (2017:2023[pdat]))) AND (detection or concentration or level AND ((clinicaltrial[Filter] OR meta-analysis[Filter] OR randomizedcontrolledtrial[…
		PubMed (2023-03-20):	118
		Scoping Search 3:	Analyte (AND Detection); equivalent to Component search 1
		Search (PubMed syntax):	((Dronabinol or THC or tetrahydrocannabinol or cannabinoids) OR (Dronabinol[MeSH Terms]) AND ((clinicaltrial[Filter] OR meta-analysis[Filter] OR randomizedcontrolledtrial[Filter] OR systematicreview[Filter]) AND (humans[Filter]) AND (english[Filter]) AND (2017:2023[pdat]))) AND (detection or concentration or level AND ((clinicaltrial[Filter] OR meta-analysis[Filter] OR randomizedcontrolledtrial[F…
		PubMed (2023-03-20):	273
		Scoping Search 4:	Analyte (AND Detection) AND Biofluid AND Sensor Type, without publication type limits, limit to 2017-
		Search (PubMed syntax):	((((Dronabinol or THC or tetrahydrocannabinol or cannabinoids) OR (Dronabinol[MeSH Terms])) AND (detection or concentration or level) AND ((humans[Filter]) AND (english[Filter]) AND (2017:2023[pdat]))) AND ((blood or saliva or urine or sputum or sweat[MeSH Terms]) OR (saliva or "oral fluid" or blood or sweat or breath or urine) AND ((humans[Filter]) AND (english[Filter]) AND (2017:2023[pdat])))) …
		PubMed (2023-03-20):	66
		Scoping Search 5:	Analyte AND Sensor Type, without publication type limits, limit to 2017-
		Search (PubMed syntax):	((Dronabinol OR *THC OR *tetrahydrocannabinol) OR (Dronabinol[MeSH Terms])) AND ((electrochemical OR "optical sensor" OR bioassay* OR biosensor OR "field-effect transistor" OR aptasensor OR immunoassay* OR immunosensor OR spectroelectrochemical OR sensor OR "LC-MS"))
		PubMed (2023-03-20):	168

## Sheet: PubMed, Filtered
PMID	Title	Authors	Citation	Journal/Book	Publication Year	DOI	Notes	Detection Technique	Sample Preparation	Sensing Layer Composition	Concentration Range	Selectivity	Limit of Detection	Limit of Quantification	Detection Time	Reusability	Robustness (pH, Biofouling, Temp, Chemicals)	Body Fluid Tested	Other
27341312	Simultaneous quantification of major cannabinoids and metabolites in human urine and plasma by HPLC-MS/MS and enzyme-alkaline hydrolysis	Aizpurua-Olaizola O, Zarandona I, Ortiz L, Navarro P, Etxebarria N, Usobiaga A.	Drug Test Anal. 2017 Apr;9(4):626-633. doi: 10.1002/dta.1998. Epub 2016 Jun 24.	Drug Test Anal	2017	10.1002/dta.1998	None	HPLC–MS/MS	Yes	Kinetex C18 100Å column (2.6 μm, 150 mm x 3 mm i.d.) with a guard column (0.5 μm depth filter x 0.1 mm)	1 to 4000 ng/mL in MeOH for the metabolites 11-OH-THC and THCCOOH; 1 to 1000 ng/mL for the rest of cannabinoids.	No interferences were observed in the drug-free samples and no carryover phenomena in blank samples injected after the highest calibration point	<1 ng/mL	0.2-1 ng/mL	28 min	Yes	• Four sample pretreatment procedures studied: hydrolysis-free, alkaline, enzymatic, and enzyme-alkaline tandem hydrolysis. • Hydrolysis-free: Glucuronide compounds showed no cleavage during process, as anticipated. • Alkaline hydrolysis (80 μl 10M NaOH added to samples, incubated at 60C for 20 min, subsequently cooled to room temp and neutralized with 50 μl AcOH): THC-COOH-glu cleavage was total…	Urine; plasma	None
27617793	Sensitive determination of THC and main metabolites in human plasma by means of microextraction in packed sorbent and gas chromatography-tandem mass spectrometry	Rosado T, Fernandes L, Barroso M, Gallardo E.	J Chromatogr B Analyt Technol Biomed Life Sci. 2017 Feb 1;1043:63-73. doi: 10.1016/j.jchromb.2016.09.007. Epub 2016 Sep 6.	J Chromatogr B Analyt Technol Biomed Life Sci	2017	10.1016/j.jchromb.2016.09.007	None	GC–MS/MS	Yes	Capillary column (30 m × 0.25-mm I.D., 0.25-m film thickness) with 5% phenylmethylsiloxane (HP-5 MS)	0.1 to 30 ng/mL	No interferences from endogenous substances, and the other compounds were observed	0.1 ng/mL	0.1 ng/mL	~20 min	Yes	Microextraction by packed sorbent (MEPS) was studied to determine optimal conditions. MEPS parameters studied included the number of strokes (extraction cycles) and solvent extraction conditions. • Optimal MEPS solvent recovery conditions for 11-OH-THC and THC-COOH: 3% AcOH, 5% MeOH, 10% NH4OH. • For extraction cycles, 16-26 strokes were studied, with THC-COOH determined to be the most affected c…	Plasma	None
27815614	Cannabinoids assessment in plasma and urine by high performance liquid chromatography-tandem mass spectrometry after molecularly imprinted polymer microsolid-phase extraction	Sánchez-González J, Salgueiro-Fernández R, Cabarcos P, Bermejo AM, Bermejo-Barrera P, Moreda-Piñeiro A.	Anal Bioanal Chem. 2017 Feb;409(5):1207-1220. doi: 10.1007/s00216-016-0046-3. Epub 2016 Nov 4.	Anal Bioanal Chem	2017	10.1007/s00216-016-0046-3	None	HPLC-MS/MS	Microsolid-phase extraction (μ-SPE)	Molecularly imprinted polymer (MIP)/Zorbax Eclipse Plus C18 (100 mm length × 4.6 mm i.d., 3.5 um particle diameter) reverse phase column, coupled to a Phenomenex C8 guard column (4 mm length × 3.0 mm i.d.)	0.1 to 1.0 mL of plasma/urine	Since a selective MIP is used as an adsorbent for u-SPE, and tandem MRM is used for detection of the analytes, selectivity of the proposed procedure is high. Experiments based on using 11 drug-free plasma/urine samples (blanks) subjected to the MIP-u-SPE procedure (six MIP-u-SPE devices) did not show chromatographic signals at the selected precursor ion→product ion transitions	Plasma Δ9-THC: 0.11 ng/mL; Δ9-THC-OH: 0.12 ng/mL; Δ9-THC-COOH: 0.15 ng/mL. Urine Δ9-THC: 0.16 ng/mL; Δ9-THC-OH: 0.17 ng/mL; Δ9-THC-COOH: 0.14 ng/mL	Plasma Δ9-THC: 0.18 ng/mL; Δ9-THC-OH: 0.21 ng/mL; Δ9-THC-COOH: 0.25 ng/mL. Urine Δ9-THC: 0.27 ng/mL; Δ9-THC-OH: 0.28 ng/mL; Δ9-THC-COOH: 0.23 ng/mL	9 min	Yes	Optimum retention of analytes (0.1 to 1.0 mL of plasma/urine) was achieved by fixing plasma/urine pH at 6.5 and assisting the procedure by mechanical shaking (150 rpm, 40 °C, 12 min). Optimum elution conditions implied 2 mL of a 90:10 methanol/acetic acid and ultrasound extraction (35 kHz, 325 W) for 6 min.	Plasma; Urine	None
27862053	Fluorescence-based lateral flow assays for rapid oral fluid roadside detection of cannabis use	Plouffe BD, Murthy SK.	Electrophoresis. 2017 Feb;38(3-4):501-506. doi: 10.1002/elps.201600075. Epub 2016 Nov 28.	Electrophoresis	2017	10.1002/elps.201600075	None	Lateral flow assay	No	Immunoassay detection of polymeric beads, conjugated to antibodies against native THC	100–0.0100 ng/mL	?	0.01 ng/mL	1 ng/mL	5 min	No	Law enforcement would not be expected to precisely dispense a controlled volume of OF, such as a micropipette or syringe, thus roadside condition would better simulated with a dip test.	Oral fluid	None
28069869	Determination of ∆-9-tetrahydrocannabinol (THC), 11-hydroxy-THC, 11-nor-9-carboxy-THC and cannabidiol in human plasma using gas chromatography-tandem mass spectrometry	Andrenyak DM, Moody DE, Slawson MH, O'Leary DS, Haney M.	J Anal Toxicol. 2017 May 1;41(4):277-288. doi: 10.1093/jat/bkw136.	J Anal Toxicol	2017	10.1093/jat/bkw136	None	GC–MS/MS	Yes	DB-1MS (30 M, 0.25 mm id, 0.1 μm film thickness)	THC and OH-THC, 0.1 to 100; CBD, 0.25 to 100; COOH-THC, 0.5– 500 ng/mL	2.91-15.6% (mean donor PAR/LLOQ mean PAR); ≤20% acceptable	Article did not specify LOD but used the term LOQ interchangeably	0.1-0.5 ng/mL	100°C, hold 0.2 minutes, 20°C/minute to 280°C, hold 2 minutes, 70°C/minute to 310°C	Yes	Room temperature bench top stability of the cannabinoid compounds in plasma controls was evaluated at 4, 12, and 25 hours. No loss of THC, OH-THC, COOH-THC, and CBD in the controls maintained at room temperature prior to analysis. • Plasma controls stored at -20C were stable out to 207 days. • Control samples that underwent three freeze/thaw cycles also showed no losses of cannabinoid compounds. …	Plasma	None
28088044	Dried haematic microsamples and LC-MS/MS for the analysis of natural and synthetic cannabinoids	Protti M, Rudge J, Sberna AE, Gerra G, Mercolini L.	J Chromatogr B Analyt Technol Biomed Life Sci. 2017 Feb 15;1044-1045:77-86. doi: 10.1016/j.jchromb.2016.12.038. Epub 2016 Dec 30.	J Chromatogr B Analyt Technol Biomed Life Sci	2017	10.1016/j.jchromb.2016.12.038	None	LC–MS/MS	Yes	Reversed phase Waters XTerra MS C18 (2.5 um, 2.1 mm × 50 mm) column, maintained at room temperature. 0.1% FA in acetonitrile (solvent A) and 0.1% FA in water (solvent B)	0.1-100 ng/mL (THC analyte linearity range)	To assess method selectivity towards potentially interfering endogenous compounds, blank DBS and VAMS samples were collected from 6 different healthy volunteers and processed. No unexpected interference (peak area > of analyte LOD response) was observed in MRM chromatogram channels, demonstrating a good selectivity	0.03-0.1 ng/mL	0.1-0.5 ng/mL	11 min	Yes	Samples tested in this study were dried blood samples. Finger pricked blood drop samples can vary in volume, and spread of blood can vary depending on density. Therefore, the haematocrit (HCT) levels variation for the samples were studied for potential influence in analyte determination. Blank blood samples spiked at 3 analyte concentration levels were prepared in blood at 30%, 45%, and 60% of HC…	Dried blood samples, which include conventional dried blood spots (DBS) and dried blood samples collected via volumetric absorptive microsampling (VAMS) approach	None
28192758	Ultra-high performance liquid chromatography tandem mass-spectrometry for simple and simultaneous quantification of cannabinoids	Jamwal R, Topletz AR, Ramratnam B, Akhlaghi F.	J Chromatogr B Analyt Technol Biomed Life Sci. 2017 Mar 24;1048:10-18. doi: 10.1016/j.jchromb.2017.02.007. Epub 2017 Feb 6.	J Chromatogr B Analyt Technol Biomed Life Sci	2017	10.1016/j.jchromb.2017.02.007	None	U-HPLC–MS/MS	Yes	Acquity BEH C18 column using a gradient comprising water (0.1% formic acid) and methanol (0.1% formic acid)	1.56-100 ng/mL	Sensitivity. No interference was visually observed at the retention time of analytes in blank plasma extracted from seven different donors. Several plasma phospholipids eluted after the analytes thus did not interfere with the assay. However, there was some overlap for THC. Post-column infusion showed that there was some degree of suppression at the RT of THC and THC-D3. Though THC and THC-D3 elu…	<1 ng/mL	1.56 ng/mL	6 min	Yes	Bench-top, freeze-thaw, auto-sampler and short-term stability ranged from 92.7 to 106.8% of nominal values. Bias for auto-sampler, freeze-thaw, bench-top and short-term stability ranged from −4.40 to 13.72.	Human plasma	None
28201761	Evaluation of an Automated Reader and Color Interpretation-Based Immunoassays for Multiplexed Drug-of-Abuse Testing in Urine	Kim SY, Kim H, Park Y, Lim J, Kim J, Koo SH, Kwon GC.	J Anal Toxicol. 2017 Jun 1;41(5):412-420. doi: 10.1093/jat/bkx014.	J Anal Toxicol	2017	10.1093/jat/bkx014	None	An automated reader, the Multi-Drug Screen Test Device with DxLINK and two colorimetric immunoassays, the One Step Multi-Line Screen Panel with Integrated E-Z Split Key Cup II and the One Step Multi-Drug Screen Panel card	?	Competitive binding immunoassay	THC cut-off 50 ng/mL (positive/negative)	At ±50% of each cut-off level, the three on-site drug-testing devices exhibited high positive and negative agreement (greater than 90%) with the control materials, as confirmed by mass spectrometry, for most drug classes	Cut-off 50 ng/ml	Not stated	Not stated	No	Due to the instability of the control materials, assessments of high-concentration THC could not be made.	Urine	None
28640062	An Atmospheric Pressure Chemical Ionization MS/MS Assay Using Online Extraction for the Analysis of 11 Cannabinoids and Metabolites in Human Plasma and Urine	Klawitter J, Sempio C, Mörlein S, De Bloois E, Klepacki J, Henthorn T, Leehey MA, Hoffenberg EJ, Knupp K, Wang GS, Hopfer C, Kinney G, Bowler R, Foreman N, Galinkin J, Christians U, Klawitter J.	Ther Drug Monit. 2017 Oct;39(5):556-564. doi: 10.1097/FTD.0000000000000427.	Ther Drug Monit	2017	10.1097/FTD.0000000000000427	None	LC-MS/MS	Yes	A 4.6 · 12.5 mm online extraction column (Zorbax XDB C8, Agilent Technologies) with a particle size of 5 μm	0.39-7431 ng/mL	There was no endogenous signal interference within the extracted blank sample of each individual lot used.	?	0.39-3.91 ng/mL (plasma); 400 or 2000 ng/mL (urine)	6.2 min	Yes	There was no impact on the stability of cannabinoids observed in either plasma or urine when samples were exposed to up to three freeze–thaw cycles (please see Table S3 in the Supplemental Digital Contents). Furthermore, extracted plasma and urine samples were stable in the autosampler at +4 °C for up to 48 hours. Cannabinoids in plasma and urine were stable at ambient temperature (benchtop) for …	Human plasma and urine	None
29186023	Highly Sensitive FPW-Based Microsystem for Rapid Detection of Tetrahydrocannabinol in Human Urine	Lan JW, Hsieh CH, Huang IY, Lin YC, Tsai TY, Wang CC.	Sensors (Basel). 2017 Nov 29;17(12):2760. doi: 10.3390/s17122760.	Sensors (Basel)	2017	10.3390/s17122760	None	Flexural plate-wave (FPW)-based microsystem	Minimal	Integrated cystamine SAM/glutaraldehyde/THC antibody/THC antigen multilayer	1.5625-50 ng/mL	Different concentration of prostate specific antigen urine are also measured, there are no frequency shift at 1.5625, 3.125, 25, and 50 ng/mL, and the frequency shifts are only 20–30 kHz at 7.25 and 12.5 ng/mL (which can be considered measurement errors).	1.5625 ng/mL	1.5625 ng/mL	<10 min	?	N/A	Urine	None
29044958	A simple validated multi-analyte method for detecting drugs in oral fluid by ultra-performance liquid chromatography-tandem mass spectrometry (UPLC-MS/MS)	Zheng Y, Sparve E, Bergström M.	Drug Test Anal. 2018 Jun;10(6):1001-1008. doi: 10.1002/dta.2325. Epub 2017 Dec 18.	Drug Test Anal	2018	10.1002/dta.2325	None	UPLC–MS/MS analysis	Dilution with acetonitrile and methanol followed by centrifugation	BEH‐C18 column 1.7 μM with a column dimension of 2.1 x 50 mm	1.5–600 ng/mL	There was no significant effect on internal standards in blanks, in calibration or in patient samples, thus, there were negligible matrix effects in oral fluid samples	It was difficult to estimate limit of detection (LOD) using S/N since oral fluid samples produced very low noise levels and, hence, LODs were not fully investigated	The measuring interval has to be restricted and perhaps, in some cases, the cut‐off value for positive/negative test adjusted	5 min	Yes	The matrix effect was not a significant problem in this method when comparing the quantified result from 10 different oral‐fluid samples with a blank sample.	Oral fluid	None
29135039	A novel fast method for aqueous derivatization of THC, OH-THC and THC-COOH in human whole blood and urine samples for routine forensic analyses	Stefanelli F, Pesci FG, Giusiani M, Chericoni S.	Biomed Chromatogr. 2018 Apr;32(4). doi: 10.1002/bmc.4136. Epub 2018 Jan 3.	Biomed Chromatogr	2018	10.1002/bmc.4136	None	GC/MS	Yes	15m Rtx® ‐5MS column (Crossbond® 5% diphenyl–95% dimethylpolysiloxane, 0.25 mm internal diameter and 0.25 um film thickness)	Hydrolyzed urine: THC and THC‐COOH, 2.5–300. Whole blood: THC 0.5–20; OH‐THC 1.0–50; THC‐COOH 2.5–100.	No peaks susceptible of co‐elution were detected in the drug‐free samples	Hydrolyzed urine: THC, 0.5; THC‐COOH, 1.2. Whole blood: THC and OH‐THC, 0.2; THC‐COOH, 0.9	Hydrolyzed urine: THC 1.3; THC‐COOH 2.6. Whole blood: THC 0.5; OH‐THC 0.6; THC‐COOH 2.4	~15 min	Yes	Samples reanalyzed at 24, 48 and 72 h after the first analysis showed no differences compared with the first determination (both CV and bias <15%) and this confirmed that propyl esters obtained with PCF were stable under the storage condition used.	Blood; Urine	None
29262425	Quantitative Determination of Δ9-THC, CBG, CBD, Their Acid Precursors and Five Other Neutral Cannabinoids by UHPLC-UV-MS	Wang YH, Avula B, ElSohly MA, Radwan MM, Wang M, Wanas AS, Mehmedic Z, Khan IA.	Planta Med. 2018 Mar;84(4):260-266. doi: 10.1055/s-0043-124873. Epub 2017 Dec 20.	Planta Med	2018	10.1055/s-0043-124873	None	UHPLC‑UV‑MS	Yes	Cortec UPLC C18 column (100 mm× 2.1 mm I.D., 1.6 μm) from Waters	LOQ-50 or 100 ug/mL	All analytes were baseline separated in a 10-min run time	0.2-0.4	0.5 or 1.0	10 min	Yes	Different extraction solvents were evaluated and a mixture of acetonitrile and methanol (80 : 20, v/v) showed the best extraction efficiency. CBL was only identified from hashish samples, which suggests that CBL could be an artifact formed under the influence of light or heat during processing.	Flower bud, leaf, and hashish samples	None
29301050	Field Detection of Drugs of Abuse in Oral Fluid Using the Alere™ DDS®2 Mobile Test System with Confirmation by Liquid Chromatography Tandem Mass Spectrometry (LC-MS/MS)	Krotulski AJ, Mohr ALA, Friscia M, Logan BK.	J Anal Toxicol. 2018 Apr 1;42(3):170-176. doi: 10.1093/jat/bkx105.	J Anal Toxicol	2018	10.1093/jat/bkx105	None	Alere™ DDS®2 Mobile Test System vs LC–MS/MS	Minimal	? Vs Agilent Eclipse Plus C18 column (3.5 μm, 4.6 × 100 mm)	1-1,000 ng/mL	1	1 ng/mL	1 ng/mL	?	?	When evaluating device performance against true rates of cannabis use by the subject population (as assessed by a 1 ng/mL threshold), the performance of the DDS®2 was weaker.	Oral fluid	None
29408718	Detection of delta-9-tetrahydrocannabinol (THC) in oral fluid, blood and urine following oral consumption of low-content THC hemp oil	Hayley AC, Downey LA, Hansen G, Dowell A, Savins D, Buchta R, Catubig R, Houlden R, Stough CKK.	Forensic Sci Int. 2018 Mar;284:101-106. doi: 10.1016/j.forsciint.2017.12.033. Epub 2017 Dec 24.	Forensic Sci Int	2018	10.1016/j.forsciint.2017.12.033	None	Securetec Drugwipe1 II Twin device vs SCIEX Q-TRAP 5500 Mass Spectrometer, coupled to an Eksigent ekspert ultraLC 100 (UHPLC) system.	Yes	Lateral flow immunoassay technology	0-0.0040 mg/L	?	0.001 mg/L for THC and 0.002 mg/L for THCa	0.0002 mg/L	5 min	?	Average degradation at 1-month post-manufacture after storage at 5 _x0004_C was an average of +1.43 and 6.01% for the high THC sample, whilst the low THC sample remained stable within 2% analytical error (actual result, 1.43%). At approximately 1 year post manufacture, average degradation was recorded as 12.86% and 8.55% for the low and high THC sample, respectively (only one high-dose THC sample…	Oral fluid, blood, and urine	None
29457201	Validity of oral fluid test for Delta-9-tetrahydrocannabinol in drivers using the 2013 National Roadside Survey Data	Jin H, Williams SZ, Chihuri ST, Li G, Chen Q.	Inj Epidemiol. 2018 Feb 19;5(1):3. doi: 10.1186/s40621-018-0134-2.	Inj Epidemiol	2018	10.1186/s40621-018-0134-2	None	Enzyme-linked immunosorbent assay (ELISA) then LC/MS/MS	Yes	?	0->5 ng/mL	98.3% (specificity)	Oral fluid: 2 ng/mL; blood: 10 ng/mL (ELISA), 1 ng/mL LC/MS/MS	?	?	?	?	oral fluid vs blood	None
29574346	Evaluation of three rapid oral fluid test devices on the screening of multiple drugs of abuse including ketamine	Tang MHY, Ching CK, Poon S, Chan SSS, Ng WY, Lam M, Wong CK, Pao R, Lau A, Mak TWL.	Forensic Sci Int. 2018 May;286:113-120. doi: 10.1016/j.forsciint.2018.03.004. Epub 2018 Mar 12.	Forensic Sci Int	2018	10.1016/j.forsciint.2018.03.004	None	DrugWipe, Ora-Check and SalivaScreen vs LCMS	Yes	? Vs Waters Acquity HSS C18 SB column (1.8 mm, 2.1 x 100 mm)	0.5-1958 ng/mL	?	Cut off values of 0.5-50 ng/mL (positive/negative)	?	13-17 min	? Vs yes	The test completion rate of Ora-Check was very low (52%) due to the large number of cases with insufficient oral fluid (n = 255) and 5 cases of QC failure. There was 1 case with completed ROFT testing but missing LCMS analysis due to insufficient oral fluid volume. The overall number of valid samples (successful ROFT and LCMS testing) was 286 (52%).	Oral fluid	None
29955732	Multi-laboratory validation of a Δ9-tetrahydrocannabinol LC-MS/MS test kit designed for quantifying THC and marijuana metabolites in blood	Patton AL, Jones JO, Nord A, Eversole DW, Feazell EE, Mauldin K, Li L, Williams LD, Bai S, Channell K, Endres G, Gamette M, Moran JH.	Forensic Sci Criminol. 2018;3(1):10.15761/FSC.1000125. doi: 10.15761/FSC.1000125. Epub 2018 Mar 28.	Forensic Sci Criminol	2018	10.15761/FSC.1000125	None	THC ToxBox (extraction kit) + LC-MS/MS	Yes	3 μm UCT Selectra DA (100 × 2.1 mm) LC column	1-500 ng/mL	?	1-5 ng/mL	0.1-2.0 ng/mL (which were lower than LODs. Thus, LOQs were administratively defined as the LOD)	6-min	Yes	The sample extraction procedure enabled low-level detection on multiple instrument platforms by adequately removing interfering components and background noise.	Blood	None
29960257	A fast and reliable method for quantitation of THC and its 2 main metabolites in whole blood by GC-MS/MS (TQD)	Castro AL, Tarelho S, Melo P, Franco JM.	Forensic Sci Int. 2018 Aug;289:344-351. doi: 10.1016/j.forsciint.2018.06.003. Epub 2018 Jun 15.	Forensic Sci Int	2018	10.1016/j.forsciint.2018.06.003	None	GC–MS/MS	Yes	J&W Capillary Column (30 m–0.25 mmi.d.–0.25 film thickness)	1–100 ng/mL	No false positives or negatives were detected	0.29 (11-OH-THC), 0.31 (9THC), 0.33 (THCCOOH) ng/mL	0.87 (11-OH-THC), 0.93 (9THC), 0.99 (THCCOOH) ng/mL	7.6 min	Yes	?	Whole blood	None
29963208	Application of the QuEChERS procedure for analysis of Δ(9)-tetrahydrocannabinol and its metabolites in authentic whole blood samples by GC-MS/MS	Dybowski MP, Dawidowicz AL.	Forensic Toxicol. 2018;36(2):415-423. doi: 10.1007/s11419-018-0419-8. Epub 2018 May 7.	Forensic Toxicol	2018	10.1007/s11419-018-0419-8	None	GC-MS/MS	Yes	Zebron ZB5-MSi fused-silica capillary column (30 m × 0.25 mm i.d., 0.25 μm film thickness	0.1-50 (THC) and 1-50 ng (11-OH-THC and 11-COOH-THC) mg/g	Absence of peaks of the examined analytes and/or their significant interference on chromatograms confirms the high selectivity of the described method	0.011-0.13 ng/g	0.033-0.43 ng/g	17 min	Yes	?	Blood	None
30173008	A novel capacitive sensor based on molecularly imprinted nanoparticles as recognition elements	Canfarotta F, Czulak J, Guerreiro A, Cruz AG, Piletsky S, Bergdahl GE, Hedström M, Mattiasson B.	Biosens Bioelectron. 2018 Nov 30;120:108-114. doi: 10.1016/j.bios.2018.07.070. Epub 2018 Aug 7.	Biosens Bioelectron	2018	10.1016/j.bios.2018.07.070	None	Nano molecularly imprinted polymers	?	THC and trypsin-imprinted nanoMIPs capacitive biosensor electrodes	?	?	?	?	?	?	?	N/A	None
30412688	A UHPLC-MS/MS method for the quantification of Δ9-tetrahydrocannabinol and cannabidiol in decoctions and in plasma samples for therapeutic monitoring of medical cannabis	Barco S, Fucile C, Manfredini L, De Grandis E, Gherzi M, Martelli A, Tripodi G, Mattioli F, Cangemi G.	Bioanalysis. 2018 Dec;10(24):2003-2014. doi: 10.4155/bio-2018-0184. Epub 2018 Nov 6.	Bioanalysis	2018	10.4155/bio-2018-0184	None	UHPLC–MS/MS	Yes	Waters Acquity HSS T3 column (150 mm × 2.1 mm, i.d. 1.8 um)	0.16 to 10 ng/mL for both THC and CBD and in decoctions from 4.7 to 600 ng/mL.	Starting from the observation, in real samples, of two interfering chromatographic peaks in THC and CBD ion transitions with APCI ionization, they demonstrated that this interference was due to the in-source decarboxylation of THC-A and CBD-A into neutral forms that occurs with APCI but not with HESI.	?	Intra-assay: CBD, 0.17 ± 0.02; THC, 0.16 ± 0.02. Inter-assay: CBD, 0.16 ± 0.03; THC, 0.15 ± 0.02	8 min	Yes	Its robustness has been tested both on QC and patient samples obtained in a clinical study involving children and young adult patients.	Plasma; Decoctions	None
30231009	Cannabinoids determination in bronchoalveolar lavages of cannabis smokers with lung disease	Rotolo MC, Pellegrini M, Martucci P, Giacobbe R, De Palma A, Pacifici R, Pichini S, Busardò FP, Bisconti M.	Clin Chem Lab Med. 2019 Mar 26;57(4):498-503. doi: 10.1515/cclm-2018-0426.	Clin Chem Lab Med	2019	10.1515/cclm-2018-0426	None	GC-MS	Yes	Fused silica capillary column (HP-5MS, 30 m, 0.25 mm i.d, film thickness 0.25 mm).	THC, 11-OH-THC, THC-COOH, 0.8-100 ng/mL; CBD, CBN, 0.5-100 ng/mL	No additional peaks due to endogenous substances or other drugs of abuse (opiates, cocaine, amphetamines, benzodiazepines) that could have interfered with the detection of the compounds of interest in drug-free and drugs of abuse spiked samples	THC, 0.3 ng/mL; CBD, CBN, 11-OH-THC, THC-COOH, 0.2 ng/mL	THC, 11-OH-THC, THC-COOH, 0.8 ng/mL; CBD, CBN, 0.5 ng/mL	~20 min	Yes	No significant ion suppression/enhancement (<10% analytical signal suppression due to matrix effect) occurred during chromatographic runs. No significant degradation after any of the three freeze/thaw cycles; the differences in concentration compared to the initial concentration were <10%. Similar results (differences always lower than 10%) in the case of a mid-term stability test, performed re-a…	Bronchoalveolar lavage	None
30272189	Drug screening using the sweat of a fingerprint: lateral flow detection of Δ9-tetrahydrocannabinol, cocaine, opiates and amphetamine	Hudson M, Stuchinskaya T, Ramma S, Patel J, Sievers C, Goetz S, Hines S, Menzies E, Russell DA.	J Anal Toxicol. 2019 Mar 1;43(2):88-95. doi: 10.1093/jat/bky068.	J Anal Toxicol	2019	10.1093/jat/bky068	None	Drug Screening Cartridge (lateral flow device) vs UHPLC–MS-MS	No	Acquity I-class UPLC system	?	The specificity of the lateral flow device gave values in excess of 94% for THC	?	?	?	No vs yes	?	Fingerprint sweat vs urine	None
30295809	Detection of Drugs in Simultaneously Collected Samples of Oral Fluid and Blood	Bakke E, Høiseth G, Arnestad M, Gjerde H.	J Anal Toxicol. 2019 Apr 1;43(3):228-232. doi: 10.1093/jat/bky079.	J Anal Toxicol	2019	10.1093/jat/bky079	None	GC-MS	Yes	?	?	?	?	?	?	Yes	?	Oral fluid and blood	None
30520828	Simultaneous Quantification of 13 Cannabinoids and Metabolites in Human Plasma by Liquid Chromatography Tandem Mass Spectrometry in Adult Epilepsy Patients	Roslawski MJ, Remmel RP, Karanam A, Leppik IE, Marino SE, Birnbaum AK.	Ther Drug Monit. 2019 Jun;41(3):357-370. doi: 10.1097/FTD.0000000000000583.	Ther Drug Monit	2019	10.1097/FTD.0000000000000583	None	LC-MS/MS	Yes	Phenomenex Kinetex EVO C18 100 x 2.1 mm, 2.6 mm column	Multiple: See Table 1	THC-COOH and THC-COOH-glu had transition ions with greater intensity than those used for this method; however, there was a more pronounced matrix interference experienced at those transitions than those used and listed in Table 2. The transition ions chosen for THC-COOH and THC-COOH-glu allowed for greater sensitivity with extracted samples	Multiple: See Table 1	Multiple: See Table 1	7 min	Yes	For sample extraction purposes, there was no difference in results when using silanized or nonsilanized test tubes, or plastic centrifuge tubes.	Plasma	None
30592550	Development and validation of a liquid chromatography-tandem mass spectrometry method for simultaneous detection of 10 illicit drugs in oral fluid collected with FLOQSwabs™ and application to real samples	Fabresse N, Aouad H, Knapp A, Mayer C, Etting I, Larabi IA, Alvarez JC.	Drug Test Anal. 2019 Jun;11(6):824-832. doi: 10.1002/dta.2563. Epub 2019 Jan 17.	Drug Test Anal	2019	10.1002/dta.2563	None	FLOQSwab™ vs UHPLC–MS/MS	Quantisal® buffer and extracted by liquid–liquid extraction for THC and by solid‐phase extraction for the remaining analytes.	Hypersil GOLD Thermo column (100 x 2.1 mm, 1.9 um) coupled to a pre‐column Hypersil GOLD Thermo (10 x 2.1 mm, 5 um)	?	Fortified sample analysis did not reveal any signal at the retention time of the analytes and internal standards	1 ng/mL for THC and 10 ng/mL for the remaining compounds	?	7.5 min	No vs yes	SWGTOX guidelines were followed for the validation procedure	Oral fluid	None
30612324	Cannabinoid concentrations in confiscated cannabis samples and in whole blood and urine after smoking CBD-rich cannabis as a "tobacco substitute"	Hädener M, Gelmi TJ, Martin-Fabritius M, Weinmann W, Pfäffli M.	Int J Legal Med. 2019 May;133(3):821-832. doi: 10.1007/s00414-018-01994-y. Epub 2019 Jan 5.	Int J Legal Med	2019	10.1007/s00414-018-01994-y	None	HPLC-DAD vs LC-MS/MS	Yes	Mercury Synergi 4 μm Polar RP trapping column (20 × 2.0 mm) and a Kinetex 2.6 μm C8 analytical column (50 × 2.1 mm)	Total CBD, THC, 11-OH-THC, and THCCOOH concentrations in urine were in the range of 7.87–148.79 μg/L, 0–1.34 μg/L, < 1–6.70 μg/L, and < 5–15.71 μg/L, respectively. Blood: Total CBD concentrations were in the range of 16.8–148.0 μg/L.	?	0.5 μg/L	< 5 μg/L	12 min	Yes	Our analyses showed fairly large discrepancies between the concentrations stated by the producers and those measured in the laboratories. These can be attributed, among other factors, to different sample preparation methods (sampling, grinding, extraction method, etc.).	Urine; blood	None
30615854	Validation of a liquid chromatography-tandem mass spectrometry method for analyzing cannabinoids in oral fluid	Sobolesky PM, Smith BE, Hubbard JA, Stone J, Marcotte TD, Grelotti DJ, Grant I, Fitzgerald RL.	Clin Chim Acta. 2019 Apr;491:30-38. doi: 10.1016/j.cca.2019.01.002. Epub 2019 Jan 4.	Clin Chim Acta	2019	10.1016/j.cca.2019.01.002	Established linearity, within-run and between-run precision, trueness and bias, limits of detection, extraction recovery, interferences, and matrix effects.	LC-MS/MS	Oasis Prime HLB C18 SPE plate	Waters 2.1×50mm Acquity UPLC BEH C18 column packed with 1.7 μm sized particles. The analytical column Pre-column packed with 1.7 μm particle size to prevent column degradation due to sample build-up.	0-2000 ng/mL for THC and 200 ng/mL for all other analytes	?	?	0.4 ng/mL for CBN, CBD, THC, 11-OH-THC, THCgluc, and THCV; and 1.0 ng/mL for THC-COOH, THC-COOH-gluc, CBG and THCA-A	5 min (LC) + 4.20 (MS)	Yes	No matrix effect was observed in the human oral fluid specimens when compared with the synthetic oral fluid used for calibrators and controls.	Oral fluid	Analytes: cannabinol (CBN), cannabidiol (CBD), Δ9-tetrahydrocannabinol (THC), 11-hydroxy-Δ9-THC (11-OH-THC), 11-nor-9-carboxy-Δ9-THC (THC-COOH), 11-nor-9-carboxy-Δ9-THC glucuronide (THC-COOH-gluc), Δ9-THC glucuronide (THC-gluc), cannabigerol (CBG),tetrahydrocannabiverin (THCV), and Δ9-tetrahydrocannabinolic acid A (THCAA). Inter-day analytical bias and imprecision at three levels of quality contr…
30904741	Dilute and shoot ultra-high performance liquid chromatography tandem mass spectrometry (UHPLC-MS/MS) analysis of psychoactive drugs in oral fluid	Malaca S, Busardò FP, Gottardi M, Pichini S, Marchei E.	J Pharm Biomed Anal. 2019 Jun 5;170:63-67. doi: 10.1016/j.jpba.2019.02.039. Epub 2019 Mar 16.	J Pharm Biomed Anal	2019	10.1016/j.jpba.2019.02.039	Δ-9-tetrahydrocannabinol, cannabidiol	UHPLC–MS/MS	Yes	Acquity UPLC BEH C18 column (2.1 mm x 75 mm, 1.7 um)	<250 ng/mL	?	CBD, 0.6 ng/mL; 9-THC 0.5 ng/mL	CBD, 1.9 ng/mL; 9-THC 1.8 ng/mL	3.95 min	Yes	No additional peaks due to endogenous substances that could have interfered with the detection of compounds of interest were observed after the injection of 20 different drug-free OF. No significant ion suppression/enhancement (less than 10% analytical signal suppression due to matrix effect with a CV% in the range of 0.3–1.2%) occurred during chromatographic runs.	Oral fluid	Also reports precision, accuracy, recovery and matrix effect
30907578	Trace Detection of Tetrahydrocannabinol in Body Fluid via Surface-Enhanced Raman Scattering and Principal Component Analysis	Sivashanmugan K, Squire K, Tan A, Zhao Y, Kraai JA, Rorrer GL, Wang AX.	ACS Sens. 2019 Apr 26;4(4):1109-1117. doi: 10.1021/acssensors.9b00476. Epub 2019 Apr 2.	ACS Sens	2019	10.1021/acssensors.9b00476	None	Surface-enhanced Raman scattering (SERS)	Yes	In situ synthesized Ag NPs in diatom photonic biosilica were prepared according to our previously published method.	10−3–10−12	The interference from the plasma background signals reduced the THC SERS intensity and a small SERS shift was obtained at 1595 and 1621 cm−1 with standard deviation of 2.2 and 4.8 cm−1, respectively	10−12 M	?	10 min	?	As time progresses, the THC molecule is altered due to hydrolysis in the PBS solution. The hydrolysis process produces a new SERS peak at 1616 cm−1, which is different than the SERS peak at 1651 cm−1 due to hydroxylation and metabolization in raw saliva. More detailed discussion can be found in the SI.	Plasma; Saliva	None
30951168	Quantitation of Cannabinoids in Breath Samples Using a Novel Derivatization LC-MS/MS Assay with Ultra-High Sensitivity	Luo YR, Yun C, Lynch KL.	J Anal Toxicol. 2019 Jun 1;43(5):331-339. doi: 10.1093/jat/bkz023.	J Anal Toxicol	2019	10.1093/jat/bkz023	THC, 11-OH-THC, THCCOOH, CBN, CBD	LC–MS/MS	Yes	Kinetex C18 column (3.0 mm × 50 mm, 2.6 μm particle)	LOQ-1000 pg/mL for all	Concentrations in these samples were close to the LOQ values and thus the deviation was more likely due to the error of measuring small qualifier peak areas rather than a selectivity issue	?	THC, 0.50 pg/mL; 11-OH-THC, 1.0 pg/mL; THCCOOH, 1.0 pg/mL; CBN,0.10 pg/mL; CBD, 0.50 pg/mL	~15 min	Yes	No interference was found among the five structurally analogous analytes, being either chromatographically separated or with different MRM transitions. No carryover was observed for the five cannabinoids. The qualifier/quantifier peak area ratios in calibrators and QC’s met the criterion of ±20% of mean calibrator transition ratio.	Breath	Also reports precision, analytical bias, recovery and matrix effect
30987714	Rapid detection and quantitation of drugs-of-abuse by wooden-tip electrospray ionization mass spectrometry	Ng TT, So PK, Hu B, Yao ZP.	J Food Drug Anal. 2019 Apr;27(2):428-438. doi: 10.1016/j.jfda.2018.09.002. Epub 2018 Oct 1.	J Food Drug Anal	2019	10.1016/j.jfda.2018.09.002	None	Wooden-tip electrospray ionization mass spectrometry (WT-ESI-MS)	Yes	A sharpened wooden tip with a length of 1.5-1.7 cm was mounted onto the capillary holder and a high voltage (3.5 kV) was applied to the tip directly from the nano-ESI source.	50e5000 ng/mL	?	THC: 400,000 ng/mL; THC-COOH: N/A	N/A	?	Yes	THC is a phenolic compound which is relatively hard to become protonated and thus tends to generate poorer signals. THC-COOH is a carboxylic acid which was supposed to generate better signals at negative ion mode. However, no obvious improvement was found with negative ion WT-ESIMS in the present study.	Urine; Oral fluid	Also reports accuracy and precision. Recommends cut-offs
31039047	First evaluation of the possibility of testing for drugged driving using exhaled breath sampling	Beck O, Ullah S, Kronstrand R.	Traffic Inj Prev. 2019;20(3):238-243. doi: 10.1080/15389588.2019.1584397. Epub 2019 Apr 30.	Traffic Inj Prev	2019	10.1080/15389588.2019.1584397	The promising results from this study provide support to exhaled breath as a viable specimen for testing of drugged driving.	LC-MS/MS	Yes	?	?	?	Positive/negative only	?	?	Yes	?	Exhaled breath; Blood; Urine	Sensitivity for breath 57%
31102828	Are oral fluid testing devices effective for the roadside detection of recent cannabis use? A systematic review	Dobri SCD, Moslehi AH, Davies TC.	Public Health. 2019 Jun;171:57-65. doi: 10.1016/j.puhe.2019.03.006. Epub 2019 May 15.	Public Health	2019	10.1016/j.puhe.2019.03.006	Systematic review of on-site oral fluid drug screening devices	OraLine, Cozart DDS, BIOSENSE Dynamic, OraLab, OrAlert, Oratect III, RapidSTAT, DrugWipe, DrugTest	N/A	Various	?	?	?	?	BIOSENSE Dynamic, Cozart DDS 806, and the DrugTest 5000, < 5 min; others 5-30 min.	No	Another issue with device usability was the rate of failed tests. There were also difficulties reading different devices, including the DrugWipe 5A, as the test line was often very weak and delayed. Cold weather affected the ability of some devices to detect and display a result.	Oral fluid	Cut-off, sensitivity, specificity, and accuracy for 9 devices are detailed in Table 1
31292788	Disposable electrochemical immunosensor array for the multiplexed detection of the drug metabolites morphine, tetrahydrocannabinol and benzoylecgonine	Eissa S, Almthen RA, Zourob M.	Mikrochim Acta. 2019 Jul 10;186(8):523. doi: 10.1007/s00604-019-3646-8.	Mikrochim Acta	2019	10.1007/s00604-019-3646-8	None	Multiplex immunosensor	Minimal	Electrodeposited Gold nanoparticles (AuNPs). Electrical printed (DEP) array electrode chips were used to fabricate the electrochemical biosensor. Each chip contains 8 separate working electrodes made with carbon, carbon auxiliary electrodes with a central reference electrode composed of silver/silver chloride	10 pg/mL–10 μg/mL	High selectivity and non significant cross reactivity for THC detection	7.0 pg.mL−1	?	20–40 min	?	?	Urine	None
31296552	Correlation of Breath and Blood Δ(9)-Tetrahydrocannabinol Concentrations and Release Kinetics Following Controlled Administration of Smoked Cannabis	Lynch KL, Luo YR, Hooshfar S, Yun C.	Clin Chem. 2019 Sep;65(9):1171-1179. doi: 10.1373/clinchem.2019.304501. Epub 2019 Jul 11.	Clin Chem	2019	10.1373/clinchem.2019.304501	THC can be reliably detected throughout the presumed 3-h impairment window following controlled administration of smoked cannabis. THC, 11-OH-THC, THC-COOH, CBN, CBD	LC-MS/MS	Yes	Kinetex C18 column (3.0mm 50 mm, 2.6-µm)	0.06 –3.2 pg/L	?	?	?	~8 min	Yes	The concentrations measured were significantly different, bringing into question the sampling device and the potential for external contamination from the environment or oral fluid or variations in the method for sample elution.	Breath; Blood	None
31321969	Tetrahydrocannabinol Detection Using Semiconductor-Enriched Single-Walled Carbon Nanotube Chemiresistors	Hwang SI, Franconi NG, Rothfuss MA, Bocan KN, Bian L, White DL, Burkert SC, Euler RW, Sopher BJ, Vinay ML, Sejdic E, Star A.	ACS Sens. 2019 Aug 23;4(8):2084-2093. doi: 10.1021/acssensors.9b00762. Epub 2019 Aug 1.	ACS Sens	2019	10.1021/acssensors.9b00762	None	Semiconductor-enriched single-walled carbon nanotubes (s-SWCNTs)	THC vapor was generated using a bubbler system.	Commercial unsorted single-walled carbon nanotubes with 33% metallic and 67% semiconducting composition and poly(9,9-di-n-dodecylfluorenyl-2,7-diyl) (PFDD) wrapped enriched semiconducting single-walled carbon nanotubes with 0.1% metallic and 99.9% semiconducting composition	1–25 ug/mL	Selectivity toward THC over ethanol, acetone, and humidity was achieved by focusing on the recovery portion of the chemiresistor sensing sequence, at which point the more volatile compounds had desorbed from the chemiresistor surface at a faster rate than THC.	0.163 ng	?	<120 min	Yes?	?	Breath	None
31356118	The utility of delta 9-tetrahydrocannabinol (THC) measures obtained from oral fluid samples in traffic safety	Romano E, Moore C, Kelley-Baker T, Torres-Saavedra PA.	Traffic Inj Prev. 2019;20(7):667-672. doi: 10.1080/15389588.2019.1635690. Epub 2019 Jul 29.	Traffic Inj Prev	2019	10.1080/15389588.2019.1635690	None	Enzyme-linked immunosorbent assays vs GC-MS or LC-MS	Quantisal	Enzyme-linked immunosorbent assays	0->200 ng/mL	All procedures were fully validated according to the accepted laboratory protocols or published procedures by examining linearity, limit of quantitation, uncertainty, interference, carryover, drug stability, and extract stability	?	All procedures were fully validated according to the accepted laboratory protocols or published procedures by examining linearity, limit of quantitation, uncertainty, interference, carryover, drug stability, and extract stability	?	No vs Yes	All procedures were fully validated according to the accepted laboratory protocols or published procedures by examining linearity, limit of quantitation, uncertainty, interference, carryover, drug stability, and extract stability.	Oral fluid; Blood	None
31357374	LC-MS/MS quantitation of phytocannabinoids and their metabolites in biological matrices	Abd-Elsalam WH, Alsherbiny MA, Kung JY, Pate DW, Löbenberg R.	Talanta. 2019 Nov 1;204:846-867. doi: 10.1016/j.talanta.2019.06.053. Epub 2019 Jun 13.	Talanta	2019	10.1016/j.talanta.2019.06.053	Review of LC-MS methods and parameters	LC-MS/MS	Tables 2-6 extensively summarise these in a range of biological matrices	Tables 2-6 extensively summarise these in a range of biological matrices	?	?	Tables 2-6 extensively summarise these in a range of biological matrices	Tables 2-6 extensively summarise these in a range of biological matrices	?	Yes	N/A	Plasma; Blood; Serum; Urine; Oral fluid; Hair; Exhaled breath	None
31407526	Detectability of various cannabinoids in plasma samples of cannabis users: Indicators of recent cannabis use?	Kraemer M, Madea B, Hess C.	Drug Test Anal. 2019 Oct;11(10):1498-1506. doi: 10.1002/dta.2682. Epub 2019 Sep 1.	Drug Test Anal	2019	10.1002/dta.2682	Detection rates of 14 cannabinoids next to Δ9‐THC and THC‐COOH (11‐OH‐THC, CBC, CBD, CBN, CBDV, THCV, CBG, CBL, Δ8‐THC, THCA, CBDA, CBGA, THCVCOOH) were determined.	LC-MS/MS	Yes	NUCLEODUR® C18 Isis (5 μm, 4.6 x 150 mm)	3.8-457 ng/mL	?	~3.8 ng/mL?	~3.8 ng/mL?	15 min	Yes	?	Plasma	Little data reported other than correspondence between plasma 9-THC and THC-COOH
31442003	Detection of Δ(9) THC in oral fluid following vaporized cannabis with varied cannabidiol (CBD) content: An evaluation of two point-of-collection testing devices	Arkell TR, Kevin RC, Stuart J, Lintzeris N, Haber PS, Ramaekers JG, McGregor IS.	Drug Test Anal. 2019 Oct;11(10):1486-1497. doi: 10.1002/dta.2687. Epub 2019 Sep 10.	Drug Test Anal	2019	10.1002/dta.2687	None	Securetec DrugWipe® 5 s (DW5s) and Dräger DrugTest® 5000 vs LC-MS/MS	Yes	? vs Eclipse XDBC18 column (50 mm x 2.1 mm i.d., particle size 3.5 μm)	2-400 ng/mL (THC) and 6-400 ng/mL (CBD)	Specificity: No interferences found	1 ng/mL for both THC and CBD (LC-MS/MS)	2 and 6 ng/mL for THC and CBD, respectively.	Retention time: 8.2 min (THC) and 6.7 min (CBD)	No and yes	?	Oral fluid	THC cut‐offs of 2 ng/mL (THC LOQ) and 1 ng/mL (THC LOD). With a 10 ng/mL confirmatory cut‐off, 5% of DW5s test results were false positives and 16% false negatives. For the DT5000, 10% of test results were false positives and 9% false negatives. Neither the DW5s nor the DT5000 demonstrated the recommended >80% sensitivity, specificity and accuracy.
31453690	On-the-Spot Detection and Speciation of Cannabinoids Using Organic Thin-Film Transistors	Comeau ZJ, Boileau NT, Lee T, Melville OA, Rice NA, Troung Y, Harris CS, Lessard BH, Shuhendler AJ.	ACS Sens. 2019 Oct 25;4(10):2706-2715. doi: 10.1021/acssensors.9b01150. Epub 2019 Aug 27.	ACS Sens	2019	10.1021/acssensors.9b01150	None	Organic Thin-Film Transistors + HPLC	Yes	Bottom-gate bottom-contact (BGBC) OTFTs were fabricated by the physical vapor deposition of 150 Å semiconducting films of either CuPc or F16-CuPc on octyltrichlorosilane (OTS)-treated Si/SiO2 substrates with prepatterned gold source-drain electrodes. HPLC: 0.22 um PTFE syringe filter	?	Interfering vapors were readily differentiable from CBD and THC vapor by their effects on VT on F16-CuPc-based devices. Only THC and CBD resulted in ΔVT <0 V, with VT THC = −35 V and VT CBD = −23 V	~1.5 pg to a maximum of 3.15 ng of cannabinoid	?	?	?	?	N/A: Plant extracts	None
31481686	A Rapid Response Electrochemical Biosensor for Detecting Thc In Saliva	Stevenson H, Bacon A, Joseph KM, Gwandaru WRW, Bhide A, Sankhala D, Dhamu VN, Prasad S.	Sci Rep. 2019 Sep 3;9(1):12701. doi: 10.1038/s41598-019-49185-y.	Sci Rep	2019	10.1038/s41598-019-49185-y	None	Affinity-based electrochemical biosensor	Yes	Anti-THC capture antibodies	100 pg/mL–10 μg/mL	?	Positive/negative only; >100 pg/mL THC	?	15-min	?	?	Saliva	This work utilizes non-faradaic EIS to rapidly and precisely detect the THC-BSA hapten with high specificity and sensitivity across numerous patients and patient samples
31600618	Quantitative biochemical screening for marijuana use and concordance with tobacco use in urban adolescents	Benowitz N, Nardone N, St Helen G, Addo N, Jacob P 3rd, Liakoni E, Jain S, Hooshfar S, Lynch K.	Drug Alcohol Depend. 2019 Dec 1;205:107583. doi: 10.1016/j.drugalcdep.2019.107583. Epub 2019 Sep 25.	Drug Alcohol Depend	2019	10.1016/j.drugalcdep.2019.107583	None	DRI tm Cannabinoid (THC) Assay vs LC–MS/MS	Oasis PRiME HLB 96-well μElution Plate	enzyme immunoassay vs Phenomenex KineteX® C18 (50×3 mm, 2.6 μm)	0.5–500.0 ng/mL for THC−COOH, and 2.5–500.0 ng/mL for THC−COOH gluc.	Specificity 99.8%	Cut-off of 50 ng/mL vs 0.5 (THC-COOH) and 2.5 ng (THC-COOH-gluc)	?	?	No vs Yes	?	Urine	The inter- and intra-day precision and accuracy of the method were better than 14.2% at the lower limit of quantification (LLOQ) and better than 9.5% over the remainder of the linear range. The absolute recoveries were above 54.9%.The matrix effects were lower than 24.1%. Sensitivity* (95% CI) 46.7 (39.0 - 54.6); Specificity* (95% CI) 99.8 (98.7 - 99.9)
31615082	Tetrahydrocannabinol Sensing in Complex Biofluid with Portable Raman Spectrometer Using Diatomaceous SERS Substrates	Sivashanmugan K, Zhao Y, Wang AX.	Biosensors (Basel). 2019 Oct 14;9(4):125. doi: 10.3390/bios9040125.	Biosensors (Basel)	2019	10.3390/bios9040125	None	Thin-layer chromatography in tandem with surface-enhanced Raman spectroscopy (TLC-SERS); fast blue salt colorimetry	Yes, saliva; No, urine	Diatomaceous earth integrated with gold nanoparticles (AuNPs)	1–1000 ppm	Moderate interference of biological molecules native to saliva	10 ppm	?	?	?	?	Saliva; Urine	None
31623719	Validated quantitative cannabis profiling for Canadian regulatory compliance - Cannabinoids, aflatoxins, and terpenes	Brown AK, Xia Z, Bulloch P, Idowu I, Francisco O, Stetefeld J, Stout J, Zimmer J, Marvin C, Letcher RJ, Tomy G.	Anal Chim Acta. 2019 Dec 11;1088:79-88. doi: 10.1016/j.aca.2019.08.042. Epub 2019 Aug 20.	Anal Chim Acta	2019	10.1016/j.aca.2019.08.042	Cannabinol, cannabidiol, cannabigerol, cannabichromene, cannabidiolic acid, cannabigerolic acid, D-9-tetrahydrocannabinol, and D-9-tetrahydrocannabinolic acid A	Multiple reaction monitoring (MRM) via LC-MS/MS and isotope dilution; gas chromatography-electron impact-tandem MS (GC-EI-MS/MS) or liquid chromatography-electrospray þ -tandem mass spectrometry analysis (LC-ESI þ -MS/MS)	Yes	XSelect® HSS T3 C18 column (2.5 mm dp x 2.1 mm x 50 mm) in conjunction with a VanGuard® HSS T3 C18 cartridge (3 mm dp x 2.1 mm x 5 mm)	0.1–9000 ngmL-1	All cannabinoids were confirmed using a qualifier transition ion	610 ng g-1 (CBD-d3), 3100 ng g-1 (CBN-d3), 7200 ng g-1 (THC-d3).	2100 ng g-1 (CBD-d3), 10 300 ng g-1 (CBN-d3), 24 000 ng g-1 (THC-d3).	<30 min	Yes	There were no significant differences in the performance of our methods as a result of any of the deliberate changes applied, and thus confirmed robustness.	N/A	Also reports some details for accuracy, precision, and matrix effects
31670108	A patient-centric liquid chromatography-tandem mass spectrometry microsampling assay for analysis of cannabinoids in human whole blood: Application to pediatric pharmacokinetic study	Moorthy GS, Vedar C, DiLiberto MA, Zuppa AF.	J Chromatogr B Analyt Technol Biomed Life Sci. 2019 Nov 1;1130-1131:121828. doi: 10.1016/j.jchromb.2019.121828. Epub 2019 Oct 21.	J Chromatogr B Analyt Technol Biomed Life Sci	2019	10.1016/j.jchromb.2019.121828	THC, CBD, and CBN	LC-MS/MS	VAMS™ assay	Acquity UPLC HSS C18 column (1.8 μm, 2.1 mm×100 mm)	1-500 ng/mL (THC); 0.5–500 ng/mL (CBD and CBN)	Double blank samples were extracted with solvent free of IS and showed an absence of interfering peaks at the retention times of all three analytes and internal. THC, CBD, and CBN demonstrated a dilution integrity of 10-fold from 2500 ng/mL to 250 ng/mL	?	1 ng/mL for THC and 0.5 ng/mL for CBD and CBN	6 min	Yes	Analytes were stable in human whole blood under assay conditions (60 h at room temperature and 24 h in autosampler post-extraction). Dried microsamples were stable for one week at 40 °C, two weeks (15 days) under different storage conditions (room temperature, 4, −20 and −78 °C), 1 month (29 days) at −20 and −78 °C and 3 months (68 days) at −78 °C.	Whole blood	THC, CBD, and CBN had accuracies and precisions of 98.1 ± 9.09, 98.9 ± 8.40, and 89.8 ± 2.49, respectively
31670217	Analysis of cannabinoids in urine samples of short-term and long-term consumers of hemp seed products	Baeck S, Kim B, Cho B, Kim E.	Forensic Sci Int. 2019 Dec;305:109997. doi: 10.1016/j.forsciint.2019.109997. Epub 2019 Oct 21.	Forensic Sci Int	2019	10.1016/j.forsciint.2019.109997	None	COBAS C311 and GC-MS	Yes	Kinetic interaction of microparticles in a solution (KIMS); Agilent J&W HP-5MS column (0.25 mm ID, 0.25 mm film thickness, 30 m)	0-100 ng/mL	Blank urine sample, without the addition of the three analytes (CBD, CBN, cTHC) exhibited no interference peaks that could obscure the analytes. Spiked urine sample, with the addition of three analytes (CBD, CBN and cTHC) were well separated their peaks in the chromatogram at 4.72, 5.59, and 6.79 min, respectively	1 ng/mL; Cut-off of 25 ng/mL	2.5 ng/mL	~16 min	Yes	?	Urine	Also reports, accuracy, precision, matrix effect, recovery, and process efficiency
31527291	Validation of a liquid chromatography tandem mass spectrometry (LC-MS/MS) method to detect cannabinoids in whole blood and breath	Hubbard JA, Smith BE, Sobolesky PM, Kim S, Hoffman MA, Stone J, Huestis MA, Grelotti DJ, Grant I, Marcotte TD, Fitzgerald RL.	Clin Chem Lab Med. 2020 Apr 28;58(5):673-681. doi: 10.1515/cclm-2019-0600.	Clin Chem Lab Med	2020	10.1515/cclm-2019-0600	None	LC-MS/MS	solid-phase extraction (SPE)	BEH C18 column (2.1 × 50 mm, 1.7 μm particles) with a BEH C18 VanGuard pre-column (2.1 × 5 mm, 1.7 μm particles)	Various; ~0.05-1000 ug/L. Table 1 presents LLOQ and ULOQ, which seem to represent the linear ranges for most analytes.	?	NS	THCCOOH-gluc 2.0; 11-OH-THC 1.0; THCCOOH 1.0; CBG 1.0; CBD 0.5; THCV 0.5; CBN 0.5; THC (blood) 0.5; [all ug/L] THC (breath) 80 pg/pad	5 min (LC only)	Yes	No major matrix effects or drug interferences	Whole blood; Breath	The intra-day imprecision ranged from 1 to 8.6% for all cannabinoids. The inter-day imprecision was slightly higher for most compounds and ranged from 4.3 to 12.5%
31566030	An assessment of urine THC immunoassay in healthy volunteers receiving an oral proton-pump inhibitor	Vohra V, Marraffa JM, Wojcik SM, Eggleston W.	Clin Toxicol (Phila). 2020 Jun;58(6):498-500. doi: 10.1080/15563650.2019.1662917. Epub 2019 Sep 30.	Clin Toxicol (Phila)	2020	10.1080/15563650.2019.1662917	Oral PPIs did not cause a false-positive THC using the THC One Step Marijuana Test Strip. Not much technical data included	THC One Step Marijuana Test Strip vs GC-MS	?	?	1.005–1.025 g/mL	?	?	?	?	?	?	Urine	None
31851409	Developing a novel packed in-tube solid-phase extraction method for determination (∆) 9-tetrahydrocannabinol in biological samples and cannabis leaves	Asiabi H, Yamini Y, Shamsayei M, Baheri T.	J Sep Sci. 2020 Mar;43(6):1128-1136. doi: 10.1002/jssc.201900965. Epub 2020 Jan 9.	J Sep Sci	2020	10.1002/jssc.201900965	None	Layered double hydroxides (LDHs)	In-tube solid-phase microext	[Cu0.58 Co0.19 Cr0.23 (OH)2] (NO3)0.23.xH2O	0.09–500, 0.3–500, and 0.4–500 μg/L	Coupling of novel CuCoCr (NO3)-LDH nano-sorbent for packed IT-SPE procedure exhibited excellent selectivity	0.02–0.1 μg/L	?	Initial experimental conditions were as follow: pH, 9; extraction time, 15 min; extraction flow rate, 4 mL/min; desorption time, 5 min; and desorption flow rate, 3 mL/min	?	The decrease in the extraction efficiency at higher pHs may be related to the point of zero charge (pHpzc) of the CuCoCr (NO3) LDH	Plasma; Serum	None
31892011	Fast and sensitive UHPLC-MS/MS analysis of cannabinoids and their acid precursors in pharmaceutical preparations of medical cannabis and their metabolites in conventional and non-conventional biological matrices of treated individual	Pichini S, Mannocchi G, Gottardi M, Pérez-Acevedo AP, Poyatos L, Papaseit E, Pérez-Mañá C, Farré M, Pacifici R, Busardò FP.	Talanta. 2020 Mar 1;209:120537. doi: 10.1016/j.talanta.2019.120537. Epub 2019 Nov 15.	Talanta	2020	10.1016/j.talanta.2019.120537	THC, THCA-A, CBD	UHPLC-MS/MS	Yes	ACQUITY UPLC® BEH C18 column from Waters® (length: 50 mm, internal diameter: 2.1 mm, particle size: 1.7 μm).	0.2–0.5 ng/mL or ng/patch in case of collected sweat.	No additional peaks due to endogenous substances that could have interfered with the detection of the analytes and ISs were observed	0.040-0.09 ng/mL (see Table 3 for all the individual values)	0.100-0.190 ng/mL (see Table 3 for all the individual values)	10 min	Yes	?	Whole blood; Urine; oral fluid; sweat	Accuracy and precision were within± 20% at LOQ for all matrices and within±15% at all the QC samples
31967116	Rapid and sensitive detection of drugs of abuse in sweat by multiplexed capillary based immuno-biosensors	Xue W , Tan X , Khaing Oo MK , Kulkarni G , Ilgen MA , Fan X .	Analyst. 2020 Feb 17;145(4):1346-1354. doi: 10.1039/c9an02498k.	Analyst	2020	10.1039/c9an02498k	None	Capillary arrays combined with competitive enzyme-linked immunosorbent assay	Minimal	Each cartridge contained 12 capillaries for multiplexed detection of up to 12 analytes	0.02 ng mL−1–1000 ng mL−1	No cross-reactivity was observed (i.e., the sensors reported zero concentrations for the missing drugs)	20 pg mL−1	?	16 min	?	?	Sweat	None
31967120	Spectroelectrochemical and computational studies of tetrahydrocannabinol (THC) and carboxy-tetrahydrocannabinol (THC-COOH)	Bindesri SD, Jebailey R, Albarghouthi N, Pye CC, Brosseau CL.	Analyst. 2020 Mar 2;145(5):1849-1857. doi: 10.1039/c9an02173f.	Analyst	2020	10.1039/c9an02173f	None	Electrochemical SERS (EC-SERS) + Raman spectrometer	Yes	Silver nanoparticles (AgNP)	?	?	?	?	?	?	?	Urine	None
32059535	Fabrication of SnO(2) Composite Nanofiber-Based Gas Sensor using the Electrospinning Method for Tetrahydrocannabinol (THC) Detection	Mehrabi P, Hui J, Janfaza S, O'Brien A, Tasnim N, Najjaran H, Hoorfar M.	Micromachines (Basel). 2020 Feb 12;11(2):190. doi: 10.3390/mi11020190.	Micromachines (Basel)	2020	10.3390/mi11020190	None	Metal oxide semiconductor (MOS)	N/A	Tin dioxide (SnO2) and poly(ethylene oxide) (PEO)	200–1000 ppm	?	?	?	?	?	?	N/A	None
32102542	Electrochemical Sensing of Cannabinoids in Biofluids: A Noninvasive Tool for Drug Detection	Klimuntowski M, Alam MM, Singh G, Howlader MMR.	ACS Sens. 2020 Mar 27;5(3):620-636. doi: 10.1021/acssensors.9b02390. Epub 2020 Mar 18.	ACS Sens	2020	10.1021/acssensors.9b02390	Review: Discusses lab based techniques for cannabinoids in biofluids	Tables 2-5 contain multiple examples	Various	Various	Tables 2-5 contain multiple examples.	?	The lowest limit of detection is 3.3 pg for Δ9-THC/mL using electrochemical immunosensors, while electrodes fabricated with low cost methods such as screen-printing and carbon paste can detect as little as 25 and 1.26 ng of Δ9-THC/mL, respectively. Tables 2-5 contain multiple examples	?	Various	Various	Various	Urine; Plasma; Saliva; Sweat; Whole blood; Breath	None
32251151	Oral Fluid to Blood Concentration Ratios of Different Psychoactive Drugs in Samples from Suspected Drugged Drivers	Bakke E, Høiseth G, Furuhaugen H, Berg T, Arnestad M, Gjerde H.	Ther Drug Monit. 2020 Oct;42(5):795-800. doi: 10.1097/FTD.0000000000000760.	Ther Drug Monit	2020	10.1097/FTD.0000000000000760	Mostly reports oral fluid:blood ratios	LC-MS/MS	?	?	?	?	Cut-offs: Blood, 2.0 nmol/L, 0.6 ug/L; Oral fluid, 3.0 nmol/L, 0.9 ug/L	?	?	Yes	?	Oral fluid; Blood	None
32330051	Electrochemical Oxidation of Δ(9)-Tetrahydrocannabinol: A Simple Strategy for Marijuana Detection	Darzi ER, Garg NK.	Org Lett. 2020 May 15;22(10):3951-3955. doi: 10.1021/acs.orglett.0c01241. Epub 2020 Apr 24.	Org Lett	2020	10.1021/acs.orglett.0c01241	None	Electrochemical	Oxidation of Δ9-THC to Δ9-THCQ	?	?	?	?	?	?	?	?	N/A	None
32341875	Thermographic detection and quantification of THC in oral fluid at unprecedented low concentrations	Thapa D, Samadi N, Patel N, Tabatabaei N.	Biomed Opt Express. 2020 Mar 24;11(4):2178-2190. doi: 10.1364/BOE.388990. eCollection 2020 Apr 1.	Biomed Opt Express	2020	10.1364/BOE.388990	None	Lateral flow immunoassay + lock-in thermography system	No	Photothermal responses of gold nanoparticles (GNPs)	0-25 ng/mL	Specificity 0.38-1 ng/mL	5 ng/mL (LIT)	N/A	?	No	?	Artificial saliva	None
32480284	A new LC-MS/MS confirmation method for the determination of 17 drugs of abuse in oral fluid and its application to real samples	Bassotti E, Merone GM, D'Urso A, Savini F, Locatelli M, Tartaglia A, Dossetto P, D'Ovidio C, de Grazia U.	Forensic Sci Int. 2020 Jul;312:110330. doi: 10.1016/j.forsciint.2020.110330. Epub 2020 May 12.	Forensic Sci Int	2020	10.1016/j.forsciint.2020.110330	None	LC-MS/MS	Dilution and centrifugation	Hypersil PFP Gold column (50 x 2.1 mm, 1.9 mm particle size)	LOD–25 ng/mL	The method was considered to be selective: Analyzing six blank samples there were no unexpected endogenous interferences >20% of LLOQ for all drugs, nor >5% of the IS signals. Peak identification was consistent	2 ng/mL cut-off	NS	12 min	Yes	Samples were stable at least 6 months at −20°C and 1 week at +4°C as all concentration values varied less than 15%.	Oral fluid	There are no significant matrix effects or ion suppression in the procedure. Intra-assay (CVs variable from 1.04 to 8.3%) and inter-assay (CVs variable from 3.37 to 10.14%) reproducibility analyses demonstrated trueness and precision.
32706449	Determination of cannabinoids in plasma using salting-out-assisted liquid-liquid extraction followed by LC-MS/MS analysis	da Silva CP, Dalpiaz LPP, Gerbase FE, Muller VV, Cezimbra da Silva A, Lizot LF, Hahn RZ, da Costa JL, Antunes MV, Linden R.	Biomed Chromatogr. 2020 Dec;34(12):e4952. doi: 10.1002/bmc.4952. Epub 2020 Aug 6.	Biomed Chromatogr	2020	10.1002/bmc.4952	None	LC-MS/MS	Salting-out assisted liquid–liquid extraction	Acquity® BEH C18 (100 × 2.1 mm, 1.7 μm	1–100 ng ml−1 for THC-COOH and 0.5–50 ng ml−1 for the other tested cannabinoids	No interferences were found in the retention times of the analytes and internal standards	?	0.5 ng ml−1 for THC, 11-OH-THC, CBN and CBD and 1.0 ng ml−1 for THC-COOH	12 min	Yes	Assay validation criteria were fulfilled. Extraction yields (88.7–97.3%) and internal-standard correct matrix effects (−9.6 to +5.4%) were acceptable.	Plasma	None
32795544	Urinary cannabinoid mass spectrometry profiles differentiate dronabinol from cannabis use	Koch CD, Xu L, Curtis SA, Roberts JD, Bunch DR, El-Khoury JM.	Clin Chim Acta. 2020 Nov;510:515-521. doi: 10.1016/j.cca.2020.08.014. Epub 2020 Aug 12.	Clin Chim Acta	2020	10.1016/j.cca.2020.08.014	None	LC-MS/MS	Yes	?	CBC 6.25–400; CBD 10.0–400; CBDV 6.25–400; CBDA 6.25–800; CBG 12.5–400; CBGA 6.25–400; CBN 6.25–400; THC-OH 6.25–200; THC-COOH 12.5–1600; THCA-A 6.25–400; THCV 12.5–400	THC did not co-elute with the isobaric cannabinoid CBD and therefore does not interfere with CBD quantification	?	6.25–12.5 ng/mL	5 min	Yes	The urine sample freeze–thaw limit for this method is 3 cycles.	Urine	None
32887103	Automated microextraction by packed sorbent of cannabinoids from human urine using a lab-made device packed with molecularly imprinted polymer	Sartore DM, Vargas Medina DA, Costa JL, Lanças FM, Santos-Neto ÁJ.	Talanta. 2020 Nov 1;219:121185. doi: 10.1016/j.talanta.2020.121185. Epub 2020 May 21.	Talanta	2020	10.1016/j.talanta.2020.121185	None	LC-MS/MS	Catechin-molded molecularly imprinted polymer (MIP)	Poroshell 120 EC-C18 (2.1 mm × 100 mm, 2.7 μm)	THC and THC-OH, 25.0-250.0 ng/mL; THC-COOH, 5.0-170.0 ng/mL	Improved interference discrimination capability of the MIP, compared to non-imprinted polymer or generic apolar sorbent materials. The absence of endogenous or exogenous interferences in the same retention time of the analytes confirmed the method selectivity for both quantification and confirmation ion transitions of all the analytes	THC and THC-OH, 5.0 ng/mL; THC-COOH, 1.0 ng/mL	THC and THC-OH, 20.0 ng/mL; THC-COOH, 5.0 ng/mL	11.5 min	Yes	?	Urine	Table 4 contains a summary of the parameters of some previous studies
33125212	Engineering Cannabinoid Sensors through Solution-Based Screening of Phthalocyanines	Comeau ZJ, Facey GA, Harris CS, Shuhendler AJ, Lessard BH.	ACS Appl Mater Interfaces. 2020 Nov 11;12(45):50692-50702. doi: 10.1021/acsami.0c17146. Epub 2020 Oct 30.	ACS Appl Mater Interfaces	2020	10.1021/acsami.0c17146	None	Spectroelectrochemistry; 1H-NMR and DOSY	?	Organic thin-film transistors (OTFTs)	?	?	?	?	Milliseconds	Yes?	?	N/A	None
33241370	Development and Validation of a Liquid Chromatography High-Resolution Mass Spectrometry (LC-HRMS) Bioanalytical Method for Quantifying Cannabinoids in Whole Blood: Application for Determining Recent Cannabis Use	DeGregorio MW, Audino SA, Montoya E, Phong A, Kao CJ, Wurz GT.	J AOAC Int. 2020 Jun 1;103(3):725-735. doi: 10.1093/jaocint/qsz011.	J AOAC Int	2020	10.1093/jaocint/qsz011	None	LC-HRMS	Yes	Restek Raptor ARC-18, 1.8 mm, 2.1 x 150 mm	5-100 ng/mL	Specificity: no analytes were detected in the solvent blanks.	0.5 ng/mL	1.0 ng/mL	14 min	Yes	?	Whole blood	None
33343424	Is the Urine Cannabinoid Level Measured via a Commercial Point-of-Care Semiquantitative Immunoassay a Cannabis Withdrawal Syndrome Severity Predictor?	Claus BB, Specka M, McAnally H, Scherbaum N, Schifano F, Bonnet U.	Front Psychiatry. 2020 Dec 3;11:598150. doi: 10.3389/fpsyt.2020.598150. eCollection 2020.	Front Psychiatry	2020	10.3389/fpsyt.2020.598150	Study correlating THC levels with withdrawal. Not much technical detail given	DRI Cannabinoid Assay (immunoassay)	?	?	?	?	50-ng/mL cutoff	?	?	No	?	Urine	None
34567693	Generic sensor platform based on electro-responsive molecularly imprinted polymer nanoparticles (e-NanoMIPs)	Garcia-Cruz A, Ahmad OS, Alanazi K, Piletska E, Piletsky SA.	Microsyst Nanoeng. 2020 Oct 19;6:83. doi: 10.1038/s41378-020-00193-3. eCollection 2020.	Microsyst Nanoeng	2020	10.1038/s41378-020-00193-3	None	Molecularly imprinted polymers (MIPs)	?	pseudo-monoclonal MIP nanoparticles	0.1-1000 μM	No cross reactivity was observed for cannabidivarin, 11-nor-9-carboxy-Δ9-tetrahydrocannabinol, (THC-COOH), and caffeine	0.05 μM	?	?	No	The shelf life was found to be at least 6 weeks for sensors stored at 25 ± 2 °C with relative humidity set at 60 ± 5%. Under these conditions, the sensors exhibited good	Plasma	None
33095968	A validated method for the simultaneous quantification of cannabidiol, Δ(9) -tetrahydrocannabinol, and their metabolites in human plasma and application to plasma samples from an oral cannabidiol open-label trial	Kevin RC, Vogel R, Doohan P, Berger M, Amminger GP, McGregor IS.	Drug Test Anal. 2021 Mar;13(3):614-627. doi: 10.1002/dta.2947. Epub 2020 Dec 1.	Drug Test Anal	2021	10.1002/dta.2947	None	UHPLC + LC-MS/MS	Supported liquid extraction	ZORBAX XDB-C18 analytical column (50 × 2.1 mm, 3.5-um particle size) and Agilent XDB-C8 guard column (12.5 × 2.1 mm, 3.5-um particle size).	CBD, 7-COOHCBD, THC, 11-COOHTHC: 0.5-100 ng/mL; 6-OHCBD: 3-100 ng/mL; 7-OHCBD, 11-OHTHC: 1-100 ng/mL	No major interfering peaks were observed in extracted blank plasma	CBD, 7-COOHCBD, 11-COOHTHC: 0.25 ng/mL; 6-OHCBD, 7-OHCBD, 11-OHTHC: 0.5 ng/mL: THC, 0.1 ng/mL	CBD, 7-COOHCBD, THC, 11-COOHTHC: 0.5 ng/mL; 6-OHCBD: 3 ng/mL; 7-OHCBD, 11-OHTHC: 1 ng/mL	6 min	Yes	When normalised against the IS, matrix effect reliably fell within ±10% for all analytes regardless of concentration	Plasma	None
33167238	THC detection in the breath	Ramzy V, Priefer R.	Talanta. 2021 Jan 15;222:121528. doi: 10.1016/j.talanta.2020.121528. Epub 2020 Aug 11.	Talanta	2021	10.1016/j.talanta.2020.121528	Review: Highlights the technologies that have been, and are being, explored to ultimately lead to a portable road-side test for THC once further testing in practice has been completed	Semiconductor-enriched single-walled carbon nanotube (s-SWCNT) chemiresistors and carbon nanotubes with integrated molecularly imprinted polymers (MIPs), giant magnetoresistive (GMR) biosensors, capillary electrophoresis (CE) with ultraviolet light-emitting diode-induced native fluorescence (UV-LEDIF), and electrochemical detection with the use of screen printed carbon electrodes and N-(4-amino-3…	Various	Various	?	?	[All ng/mL] s-SWCNT Chemiresistors 0.163; Molecularly Imprinted Carbon-Based Electrodes CNTs: 0.18 ± 0.02; Carbon microbeads: 0.32 ± 0.02; Small Molecule Detection 0–200; Capillary Electrophoresis with LED-Induced Native Fluorescence 190; Disposable Screen-printed Sensors 25–50; Electrochemical Biosensors 0.1; TLC plate and fluorescent indicator (Hound Labs device) 0.02	?	s-SWCNT Chemiresistors 49.5 min; Molecularly Imprinted Carbon-Based Electrodes N/A; Small Molecule Detection 3 min; Capillary Electrophoresis with LED-Induced Native Fluorescence 10 min; Disposable Screen-printed Sensors 30 s; Electrochemical Biosensors 1 min; TLC plate and fluorescent indicator (Hound Labs device) 1 min	?	?	Breath	None
33172758	Determination of cannabinoids in urine, oral fluid and hair samples after repeated intake of CBD-rich cannabis by smoking	Gerace E, Bakanova SP, Di Corcia D, Salomone A, Vincenti M.	Forensic Sci Int. 2021 Jan;318:110561. doi: 10.1016/j.forsciint.2020.110561. Epub 2020 Nov 1.	Forensic Sci Int	2021	10.1016/j.forsciint.2020.110561	Case report	UHPLC/MS	Yes	UHPLC Ace Excel Super C18 column 75 mm x 2.1 mm i.d., 2 mm, protected by a C18 guard column.	Urine: THC-COOH, 10–250; Oral fluid: THC and CBD, 1.0–15; Hair: THC and CBD, 20–1000; THC-COOH 0.2–10.	The SRM chromatograms from 10 negative samples of urine, oral fluid and hair showed no interfering signals (i.e., S/N ratio lower than 3) at the corresponding retention times for the three matrixes tested. This demonstrated the selectivity of the methods and that they are free from interferences from matrix components	3.0 ng/mL for THC–COOH in urine; 0.5 ng/mL for THC and CBD in oral fluid; 0.07, 5.3 and 10.0 pg/mg for THC–COOH, THC and CBD, respectively, in hair	6.0 ng/mL for THC–COOH in urine; 1.0 ng/mL for THC and CBD in oral fluid; 0.14, 10.6 and 20.0 pg/mg for THC–COOH, THC and CBD, respectively, in hair	5 min	Yes	?	Urine; Oral fluid; Hair	None
33174869	Upconverting nanoparticle clustering based rapid quantitative detection of tetrahydrocannabinol (THC) on lateral-flow immunoassay	Chand R , Mittal N , Srinivasan S , Rajabzadeh AR .	Analyst. 2021 Jan 21;146(2):574-580. doi: 10.1039/d0an01850c. Epub 2020 Nov 11.	Analyst	2021	10.1039/d0an01850c	None	Upconverting nanoparticle (UCNP) based lateral-flow immunoassay (LFIA)	Filtered, diluted	UCNPs dually conjugated with THC specific immunoglobulin G and streptavidin (UCNP–IgG–SA) and UCNPs conjugated with biotin (UCNP–biotin) were dried in CP and EP, respectively	2–15 ng mL−1	Marginally altered signals were obtained, possibly due to the interference of other molecules present in the oral fluid	2 ng mL−1 for THC	N/A	20 min	No	Marginally altered signals were obtained, possibly due to the interference of other molecules present in the oral fluid.	Oral fluids	None
33298281	UHPLC-MS/MS analysis of cannabidiol metabolites in serum and urine samples. Application to an individual treated with medical cannabis	Pichini S, Malaca S, Gottardi M, Pérez-Acevedo AP, Papaseit E, Perez-Maña C, Farré M, Pacifici R, Tagliabracci A, Mannocchi G, Busardò FP.	Talanta. 2021 Feb 1;223(Pt 2):121772. doi: 10.1016/j.talanta.2020.121772. Epub 2020 Oct 14.	Talanta	2021	10.1016/j.talanta.2020.121772	None	UHPLC-MS/MS	Yes	ACQUITY UPLC® BEH C18 column from Waters® (length: 100 mm, internal diameter: 2.1 mm, particle size: 1.7 μm).	0.05–200 ng/mL	No additional peaks due to endogenous substances that could have interfered with the detection of the analytes under investigation and ISs were observed. Similarly, none of the phytocannabinoids present in medical cannabis (THC, CBD their acidic precursors) and THC metabolites, i.e., 11-hydroxy- THC, 11-Nor-9-carboxy THC, THC-Glucuronide and 11-Nor-9-carboxy THC-Glucuronide, interfered with the a…	6-α–OH–CBD, 6-β–OH–CBD, 7-OH-CBD, 7-COOH-CBD: 0.02 ng/mL	6-α–OH–CBD, 6-β–OH–CBD, 7-OH-CBD, 7-COOH-CBD: 0.05 ng/mL	8 min	Yes	No relevant degradation was observed after three freeze/thaw cycles, with concentrations always within 10% of target for all the compounds under investigation. Similar results (CV always lower than 10%) were obtained in serum and urine QC samples analyzed before and after hydrolysis process.	Serum; Urine	Also reports: accuracy (% error); intra-assay precision (% CV); inter-assay precision (% CV); recovery (%); matrix effect (%)
33340744	Development and validation of analytical method for identification of new psychoactive substances using linear retention indexes and gas chromatography-mass spectrometry	Zacca JJ, Giudice GH, Souza MP, Caldas LNB, Vieira ML, Machado AHL.	J Chromatogr A. 2021 Jan 11;1636:461783. doi: 10.1016/j.chroma.2020.461783. Epub 2020 Dec 6.	J Chromatogr A	2021	10.1016/j.chroma.2020.461783	22 substances	GC/MS	Yes	HP-5 MS was used as the reference capillary column (5% phenyl-methylpolysiloxane, 30 m ×250 μm ×0.25 μm)	200-500 ppm	?	?	?	35 min	Yes	?	N/A	None
33346629	An Ultrafast Ultrahigh-Performance Liquid Chromatography Coupled With Tandem Mass Spectrometry Method for Cannabidiol Monitoring in Pediatric Refractory Epilepsy	Pérez Montilla CA, Schaiquevich PS, Cáceres Guido P, Caraballo RH, Reyes Valenzuela G, Cruz CV, García Bournissen F.	Ther Drug Monit. 2021 Oct 1;43(5):712-717. doi: 10.1097/FTD.0000000000000846.	Ther Drug Monit	2021	10.1097/FTD.0000000000000846	None	UHPLC + LC-MS/MS	Yes	Shimadzu Nexera X2 UHPLC and Restek Force C18 column (100 mm · 2.1 mm, 1.8 mm, and 100 Å)	1-300 ng/mL	Interference was ruled out	0.26 ng/mL	0.86 ng/mL	2 min	Yes	In-source fragmentation was observed in all glucuronides. This phenomenon has been reported previously, and it may be because of sensitivity to the cone voltages used.	Plasma	None
33434601	Development and validation of a LC-HRMS method for the quantification of cannabinoids and their metabolites in human plasma	Mohamed MK, Takyi-Williams J, Baudot B, Grobler A.	Eur J Pharm Sci. 2021 Apr 1;159:105705. doi: 10.1016/j.ejps.2021.105705. Epub 2021 Jan 9.	Eur J Pharm Sci	2021	10.1016/j.ejps.2021.105705	None	LC-HRMS	Yes	Zorbax Eclipse reverse phase C18 column (1.8 μm, 50 × 2.1 mm) fitted with Phenomenex C18 pre-column (4 × 3.0 mm).	0.2–100 ng/mL	No significant carry-over was noticed for all analytes	0.07 ng/ mL	0.2 ng/ mL	10 min	Yes	Stability at room temperature: acceptable accuracy within ±15 % of the nominal concentration was observed for all targeted cannabinoids and its metabolites.	Plasma	Also reports dilution integrity, matrix effects, recover, accuracy and precision
33596277	Delta-9-tetrahydrocannabinol (Δ(9)-THC) sensing using an aerosol jet printed organic electrochemical transistor (OECT)	Majak D, Fan J, Kang S, Gupta M.	J Mater Chem B. 2021 Mar 4;9(8):2107-2117. doi: 10.1039/d0tb02951c.	J Mater Chem B	2021	10.1039/d0tb02951c	None	Organic electrochemical transistors (OECTs)	Yes	Silver nanoparticle dispersion (Clariant PRELECTs TPS 50)	0.1 nM to 5 mM	?	0.1 nM and 1 nM diluted in DI water and synthetic saliva buffer, respectively	?	Various reported in Table 1 (30 s-45 min)	No	?	Saliva	None
33721827	Measurement uncertainty in quantifying delta-9-tetrahydrocannabinol (THC) in blood using SPE and LC/MS/MS	Klu JK, Officer JA, Park A, Mudie R, NicDaeid N.	Forensic Sci Int. 2021 May;322:110744. doi: 10.1016/j.forsciint.2021.110744. Epub 2021 Feb 22.	Forensic Sci Int	2021	10.1016/j.forsciint.2021.110744	None	LC/MS/MS	Yes	ZORBAX RRHD Eclipse Plus C18 column (2.1 mm × 50 mm, 1.8 μm)	1-10 ug/L	?	?	?	~5 MIN	Yes	?	Blood	Extensive analysis of sources of uncertainty
33817753	Analysis of 14 endocannabinoids and endocannabinoid congeners in human plasma using column switching high-performance atmospheric pressure chemical ionization liquid chromatography-mass spectrometry	Sempio C, Klawitter J, Jackson M, Freni F, Shillingburg R, Hutchison K, Bidwell LC, Christians U, Klawitter J.	Anal Bioanal Chem. 2021 May;413(12):3381-3392. doi: 10.1007/s00216-021-03280-0. Epub 2021 Apr 5.	Anal Bioanal Chem	2021	10.1007/s00216-021-03280-0	AEA, DH-g-LEA, DEA, ODA, NADA, SEA, O-AEA, 2-AGE, OEA, LEA, PEA, 2-AG, and 1-AG.	LC/LC-MS/MS	Yes	Online-trapping column (Agilent Zorbax C18, 12 mm · 4.6 mm, 5-um particle size) and an analytical column (Poroshell 120 EC-C18, 50 mm · 4.6 mm, 2.7-um particle size)	0.05–50, 0.25–50, 0.26–500, 2.1–500, 0.18–50, 0.55–50, 0.05–50, 0.10–50, 0.05–50, 74.8–250, 1–500, 1–50, 0.34–50, and 0.70–50 for AEA, O-AEA, 2-AG, 1-AG, DEA, 2-AGE, DH-g-LEA, NADA, ODA, OLA, PEA, SEA, LEA, and OEA, respectively.	Matrix interferences were not abundant for the majority of analytes	?	AEA 0.05; O-AEA 0.25; 2-AG 0.25; 1-AG 2.5; DEA 0.25; 2-AGE 0.; DH-g-LEA 0.05; NADA 0.1; ODA 0.05; OLA 5; SEA 1; LEA 0.5; OEA 1 ng/mL	6.2 min	Yes	Matrix interferences were not abundant for the majority of analytes.	Plasma	None
33844982	The analytical performance of six urine drug screens on cobas 6000 and ARCHITECT i2000 compared to LC-MS/MS gold standard	Abou El Hassan M, Colantonio D, Likhodii S, Nassar BA.	Clin Biochem. 2021 Jul;93:99-103. doi: 10.1016/j.clinbiochem.2021.04.003. Epub 2021 Apr 20.	Clin Biochem	2021	10.1016/j.clinbiochem.2021.04.003	None	ARCHITECT i2000 vs LC-MS/MS	?	Immunoassay vs Waters XEVO TQ MS UPLC system	?	?	7.1 ng/mL	15 ng/mL	?	No vs yes?	?	Urine	Negative drug screen results must be interpreted with caution especially for THC-COOH (and others)
33882283	Evaluation of the diagnostic performance of an oral fluid screening test device for substance abuse at traffic controls	Avcioglu G, Yilmaz G, Yalcin Sahiner S, Kozaci LD, Bal C, Yilmaz FM.	Clin Biochem. 2021 Jul;93:112-118. doi: 10.1016/j.clinbiochem.2021.04.009. Epub 2021 Apr 18.	Clin Biochem	2021	10.1016/j.clinbiochem.2021.04.009	None	Kite Biotechnology, drugs of abuse test kit vs LC-MS/MS	No vs yes	Competitive immunochromatographic vs Thermo Scientific Hypersil gold (100 mm × 2.1 mm, particle size of 3μ)	Natural cannabinoids 3-100 ng/mL; synthetic 0.5-30 ng/mL	Specificity 100%	Cut-off 25 ng/mL	?	8 vs 15 min	Cassette no vs yes	?	Oral fluid vs blood	The OF screening test device showed good sensitivity for cocaine, amphetamines and opiates, whereas it indicated poor sensitivity for methamphetamine/MDMA (66.7%) and failed to detect cannabis and benzodiazepines
33882447	Simultaneous quantification of 18 different phytocannabinoids in serum using a highly sensitive liquid chromatography-tandem mass spectrometry (LC-MS/MS) method	Scheunemann A, Elsner K, Germerott T, Hess C, Röhrich J.	J Chromatogr B Analyt Technol Biomed Life Sci. 2021 Apr 1;1173:122685. doi: 10.1016/j.jchromb.2021.122685. Online ahead of print.	J Chromatogr B Analyt Technol Biomed Life Sci	2021	10.1016/j.jchromb.2021.122685	The method enables simultaneous detection of delta-9-tetrahydrocannabinol, cannabidiol, cannabinol, cannabigerol, cannabichromene, cannabicyclol, tetrahydrocannabivarin and cannabidivarin and their acidic precursors tetrahydocannabinolic acid A, cannabidiolic acid, cannabinolic acid, cannabigerolic acid, cannabichromenic acid, cannabicyclolic acid, tetrahydrocannabivarinic acid and cannabidivarin…	LC-MS/MS	Yes. solid-phase extraction (SPE)	Abiphenyl column (Raptor Biphenyl 2.7 μm 100 × 2.1 mm, Restek, Homburg vor der H¨ohe, Germany) and a C18 column (ZORBAX Eclipse Plus C18 Rapid Resolution HD 2.1 × 100 mm 1.8-μ, Agilent)	Various 0.004-200 ng/mL (see Table 1 for full details)	No relevant interfering signals were detected from blank serum samples with and without ISTD	0.0004 ng/mL (THCAA) to 1 ng/mL (THC-COOH) (see Table 3 for full details)	0.004 ng/mL (CBDA) to 2 ng/mL (THC-COOH) (see Table 3 for full details)	9.5 min	Yes	?	Serum; Urine	Also reports bias, precision, recovery, and matrix effects
34185831	Biomarkers of Recent Cannabis Use in Blood, Oral Fluid and Breath	Hubbard JA, Hoffman MA, Ellis SE, Sobolesky PM, Smith BE, Suhandynata RT, Sones EG, Sanford SK, Umlauf A, Huestis MA, Grelotti DJ, Grant I, Marcotte TD, Fitzgerald RL.	J Anal Toxicol. 2021 Sep 17;45(8):820-828. doi: 10.1093/jat/bkab080.	J Anal Toxicol	2021	10.1093/jat/bkab080	None	LC-MS/MS	Yes	?	?	OF specificity at ≥5 ng/mL cut-off =100%	?	OF, 0.4 ng/mL THC, Δ9-tetrahydrocannabinol-glucuronide (THC-gluc), 11-hydroxy-Δ9-tetrahydrocannabinol (11-OH-THC), cannabidiol (CBD), Δ9-tetrahydrocannabivarin (THCV) and CBN, and 1.0 ng/mL 11-nor-9-carboxy-Δ9-tetrahydrocannabinol-glucuronide (THCCOOH-gluc), 11-nor-9-carboxy-Δ9-tetrahydrocannabinol (THCCOOH), cannabigerol (CBG) and Δ9-tetrahydrocannabinolic acid A (THCA-A); in blood, 0.5 ng/mL TH…	?	Yes	?	Blood; Oral fluid; Breath	None
34253256	Study of Δ9-tetrahydrocannabinol (THC) and cannabidiol (CBD) extraction FROM dried oral fluid spots (DOFS) and LC-MS/MS detection	Gorziza R, Cox J, Limberger RP, Arroyo-Mora LE.	J Cannabis Res. 2021 Jul 12;3(1):30. doi: 10.1186/s42238-021-00088-8.	J Cannabis Res	2021	10.1186/s42238-021-00088-8	None	LC-MS/MS	Yes	Zorbax RRHD C18 column (3.0 × 50 mm, 1.8 μm)	?	No interferences from endogenous peaks or signal contribution from internal standards were observed	2 ng/mL for THC; 4 ng/mL for CBD	?	10 min	Yes	30% loss was observed for THC and CBD when spots were dried over 35 days	Dried oral fluid spots	Also reports matrix effects, extraction recovery, process efficiency, carryover, and DOFS stability
34405898	A systematic review of quantitative analysis of cannabinoids in oral fluid	Gorziza RP, Duarte JA, González M, Arroyo-Mora LE, Limberger RP.	J Forensic Sci. 2021 Nov;66(6):2104-2112. doi: 10.1111/1556-4029.14862. Epub 2021 Aug 18.	J Forensic Sci	2021	10.1111/1556-4029.14862	Review: To summarize and to describe the methodologies for the quantitative analysis of cannabinoids in oral fluid. Not a lot of quanitative data presented	Various	Various	Various	Various	?	?	THC: 0.5-2.4 ng/mL by GC/MS; 0.025-5 ng/mL by LC-MS/MS.	Various	Various	?	Oral fluid	None
34500772	Analysis of Cannabinoids and Metabolites in Dried Urine Spots (DUS)	Moretti M, Freni F, Carelli C, Previderé C, Grignani P, Vignali C, Cobo-Golpe M, Morini L.	Molecules. 2021 Sep 2;26(17):5334. doi: 10.3390/molecules26175334.	Molecules	2021	10.3390/molecules26175334	None	Enzyme multiplied immunoassay technique (EMIT) and LC-MS/MS	Yes	Kinetex C18 column (100 _x0002_ 2.1 mm i.d., 2.6 um particle size)	10–400 ng/mL	?	THC-CBD 0.3; CBG 1.1; CBN 1.4; THCCOOH 1.4; THCCOOH-gluc 0.8; 11-OH-THC 1.9	All 10 ng/mL	~12 min	Yes	?	Dried urine spots	Also reports: accuracy; precision; matrix effect; recovery
34529995	Screening and confirmation methods for the qualitative identification of nine phytocannabinoids in urine by LC-MS/MS	Reber JD, Karschner EL, Seither JZ, Knittel JL, Walterscheid JP.	Clin Biochem. 2021 Dec;98:54-62. doi: 10.1016/j.clinbiochem.2021.09.005. Epub 2021 Sep 13.	Clin Biochem	2021	10.1016/j.clinbiochem.2021.09.005	11-OH-THC, THC, THCCOOH, CBD, CBG, CBN, THCV, 11- OH-THC-d3, THC-d3, THCCOOH-d9, CBN-d3, and THCCOOHglucuronide	LC-MS/MS	Solid-phase extraction (SPE)	Restek Raptor™ Biphenyl column (100 × 2.1 mm, 2.7 μm)	?	Exogenous interference from commonly encountered compounds was not observed. In addition, no endogenous or internal standard interferences were present that met the criteria for a positive identification for any of the analytes of interest	1 μg/L for 11-OH-THC, THC, CBD, CBG, CBN, and THCV and 5 μg/L for THCCOOH, THCVCOOH, and CBDCOOH	?	11.50 min	Yes	After 48 h, none of the analytes met the acceptable stability criteria in the confirmation method and only THCVCOOH met stability criteria in the screening method. It is recommended that all samples are analyzed within 24 h of extraction.	Urine	None
34669441	A rapid assay provides on-site quantification of tetrahydrocannabinol in oral fluid	Yu H, Lee H, Cheong J, Woo SW, Oh J, Oh HK, Lee JH, Zheng H, Castro CM, Yoo YE, Kim MG, Cheon J, Weissleder R, Lee H.	Sci Transl Med. 2021 Oct 20;13(616):eabe2352. doi: 10.1126/scitranslmed.abe2352. Epub 2021 Oct 20.	Sci Transl Med	2021	10.1126/scitranslmed.abe2352	None	EPOCH, express probe for on-site cannabis inhalation	No	Competitive immunoassay	4 orders of magnitude	?	0.17 ng/mL	?	3 min	No	Robust under the conditions of potential confounding variables such as drinking coffee, smoking cigarettes, consuming beer, and rinsing with mouth-wash.	Oral fluid	None
35036713	Rapid Development and Validation of a Liquid Chromatography-Tandem Mass Spectrometry Method to Measure Cannabinoids in Bronchoalveolar-Lavage Fluid of Patients with e-Cigarette, or Vaping, Product Use-Associated Lung Injury	Brosius CR, Caron KT, Sosnoff CS, Blount BC, Wang L.	ACS Omega. 2021 Dec 30;7(1):443-452. doi: 10.1021/acsomega.1c04815. eCollection 2022 Jan 11.	ACS Omega	2021	10.1021/acsomega.1c04815	None	HPLC–MS/MS	Yes. solid-phase extraction (SPE)	Kinetex C18 2.6 μm 2.1 × 100 mm 2 x 2 in series	THC, COOHTHC, and CBN, 0.01 to 500 ng/mL; CBD, 0.1 to 500 ng/mL; OH-THC and COOH-CBD, 0.2 to 500 ng/mL.	Specificity: No interfering peaks were seen in the quantitation chromatograms for any analyte in any of the samples.	THC 0.035; COOH-THC 0.019; OH-THC 0.153; CBD 0.078; COOH-CBD 0.094; CBN 0.030 ng/mL	?	15 min	Yes	?	Bronchoalveolar-Lavage Fluid	None
35295159	Impact of Quantisal(®) Oral Fluid Collection Device on Drug Stability	Riggio M, Dave KA, Koscak B, Blakey M, Appleton C.	Front Toxicol. 2021 Jul 5;3:670656. doi: 10.3389/ftox.2021.670656. eCollection 2021.	Front Toxicol	2021	10.3389/ftox.2021.670656	Assessing impact of Quantisal collection method	LCMS-MRM	Yes	50. mm x 3. mm, 2.6 μm, 100Å, Kinetex R Biphenyl column coupled with SecurityGuard R ULTRA cartridge of the same chemistry	2.5–250 ng/mL	?	?	?	?	Yes	?	Oral fluid	It appears that except for 19-tetrahydrocannabinol (THC), cocaine, and benzoylecgonine, the buffer solution in Quantisal R helps in preserving stability of all other drug classes with recoveries well within ±20% at room temperature and 37◦C for at least 14 days
33270860	Quantitation of Δ8-THC, Δ9-THC, Cannabidiol and 10 Other Cannabinoids and Metabolites in Oral Fluid by HPLC-MS-MS	Lin L, Amaratunga P, Reed J, Huang P, Lemberg BL, Lemberg D.	J Anal Toxicol. 2022 Feb 14;46(1):76-88. doi: 10.1093/jat/bkaa184.	J Anal Toxicol	2022	10.1093/jat/bkaa184	None	HPLC–MS-MS	Quantisal	CORTECS® C18+ (2.1 × 50 mm, 1.6 μm)	Δ8-THC 0.10–800; Δ9-THC 0.10–800; 11-OH-Δ9-THC 0.25–800; Δ9-THCCOOH 0.25–800; THCV 0.10–800; Δ9-THCA-A 2.0–500; CBD 0.10–800; CBDV 0.10–100; CBD-C1 0.10–100 0; CBDA 0.5–500; CBC 0.5–500; CBN 0.10–100; CBG 0.10–100	The matrix blank samples fortified with 5,000 ng/mL of any of the 136 listed drugs in Supplemental Table SII had no interfering peaks with any of the cannabinoids of interest in this study	?	Δ8-THC, Δ9-THC, THCV, CBD, CBDV, CBN, CBD-C1 and CBG was 0.1 ng/mL, 11-OH-Δ9-THC and Δ9-THCCOOH was 0.25 ng/mL, CBDA and CBC was 0.5 ng/mL, and Δ9-THCA-A was 2.0 ng/mL.	9 min	Yes	CBD does not convert to THC in Quantisal® devices at 22◦C or 4◦C in 14 days. CBD, Δ9-THC and Δ8-THC do not convert to other cannabinoids of this study under experimental conditions in the laboratory.	Oral fluid	Also reports carry-over, accuracy, precision, matrix effects, recoveries
33543758	Determination of Enzymatic Hydrolysis Efficiency in Detection of Cannabis Use by UPLC-MS-MS	Kul A, Sagirli O.	J Anal Toxicol. 2022 Mar 21;46(3):257-263. doi: 10.1093/jat/bkab017.	J Anal Toxicol	2022	10.1093/jat/bkab017	None	UPLC–MS-MS	Hydrolysis	Acquity UPLC HSS C18 (1.8 μm, 2.1 × 150 mm)	1-2,000 ng/mL (THC-COOH)	No interfering peaks at the retention time of THC-COOH and IS	?	1 ng/mL for THC-COOH	20 + 5 min	Yes	?	Urine	Also reports carry-over, accuracy, precision, matrix effects, dilution integrity
33754154	Simultaneous Quantification of 17 Cannabinoids by LC-MS-MS in Human Plasma	Sempio C, Almaraz-Quinones N, Jackson M, Zhao W, Wang GS, Liu Y, Leehey M, Knupp K, Klawitter J, Christians U, Klawitter J.	J Anal Toxicol. 2022 Apr 21;46(4):383-392. doi: 10.1093/jat/bkab030.	J Anal Toxicol	2022	10.1093/jat/bkab030	None	LC-MS/MS	Yes	Two Eclipse XDB-C8 (4.6 × 250 mm, 5.0 um particle size)	Table 1 details multiple - overall range 0.78-2000 ng/mL.	No endogenous interfering peaks for cannabinoids exceeding 20% of the corresponding analyte signals at the LLOQ	?	0.78-7.8 ng/mL (see table 1)	10 min	Yes	Developed and validated a robust LC–MS-MS assay for the simultaneous quantification of cannabinoids and their metabolites	Plasma	None
33998860	In Vitro Screening of Three Commercial Cannabis-Based Products on ATP-Binding Cassette and Solute-Carrier Transporter Function	Anderson LL, Etchart MG, MacNair L, Land MH, Mosesova IA, Bonn-Miller MO, Arnold JC.	Cannabis Cannabinoid Res. 2022 Jun;7(3):304-317. doi: 10.1089/can.2020.0053. Epub 2020 Sep 22.	Cannabis Cannabinoid Res	2022	10.1089/can.2020.0053	Investigating potential drug-drug interactions of commerical cannabis products through inhibition of ATP-binding cassette (ABC) and solute-carrier (SLC) transporters	Uptake and efflux transport assays	Yes	Radio-labelling	?	?	?	?	30 in	No	?	Cell culture	None
34412166	Orally administered cannabidiol does not produce false-positive tests for Δ(9) -tetrahydrocannabinol on the Securetec DrugWipe® 5S or Dräger DrugTest® 5000	McCartney D, Kevin RC, Suraev AS, Irwin C, Grunstein RR, Hoyos CM, McGregor IS.	Drug Test Anal. 2022 Jan;14(1):137-143. doi: 10.1002/dta.3153. Epub 2021 Aug 30.	Drug Test Anal	2022	10.1002/dta.3153	This study determined whether orally administered CBD produces false-positive tests for THC on standard, POC oral fluid testing devices.	DrugWipe®-5S (DW-5S; 10 ng/mL THC cut-off) and Drug Test® 5000 (DT5000; 10 ng/mL THC cut-off)	Yes	Agilent Zorbax XDB-C18 analytical column (2.1 × 50 mm, 3.5-μm particle size)	?	?	?	<LOQ, 0.4 (6.0), 15.8 (41.6) and 167 (233) ng/mL on the placebo and the 15-, 300- and 1500-mg CBD treatments	6 min	No and yes	?	Oral fluid	The likelihood of an individual who is using a CBD (only) oral formulation being falsely accused of DUIC therefore appears low
34635245	A biomolecule-free electrochemical sensing approach based on a novel electrode modification technique: Detection of ultra-low concentration of Δ⁹-tetrahydrocannabinol in saliva by turning a sample analyte into a sensor analyte	Ortega GA, Ahmed SR, Tuteja SK, Srinivasan S, Rajabzadeh AR.	Talanta. 2022 Jan 1;236:122863. doi: 10.1016/j.talanta.2021.122863. Epub 2021 Sep 9.	Talanta	2022	10.1016/j.talanta.2021.122863	None	Novel electrochemical sensor	Yes	Raman Spectrometer	1.1–100 ng/mL	The removal of the interferences contributions to the analytical signal was assured by subtracting the data obtained with the pristine Zensor electrode from the data obtained from the m-Zensor electrodes	1.6 ng/mL THC	2 to 25 ng/mL	?	?	?	Saliva	None
34736642	Early detection of cannabinoids in biological samples based on their affinity interaction with the growth hormone secretagogue receptor	Danila GM, Puiu M, Zamfir LG, Bala C.	Talanta. 2022 Jan 15;237:122905. doi: 10.1016/j.talanta.2021.122905. Epub 2021 Sep 29.	Talanta	2022	10.1016/j.talanta.2021.122905	Cannabidiol (CBD) and 11-nor-Δ9-tetrahydrocannabinol-9-carboxylic acid (carboxy-THC) act as extracellular ligands for the growth hormone secretagogue receptor (GHS-R1a), strongly promoting the binding of ghrelin (GHR), the endogenous ligand of GHS-R1a	Enzyme immunoassay vs GC-MS/MS	Yes	Biotinylated anti-GHS-R1a antibody vs HP-Ultra 1 GC column (100% dimethylpolysiloxane, 17 m × 0.20 mm, particle size 0.11 μm)	5–30 ng/mL for both CBD and carboxy-THC	GHR mimetics display no interference at concentrations up to 100 ng/mL	7.63 ng/mL for CBD and 5.12 ng/mL for carboxy-THC	?	2 h vs ~18.5 min	No vs yes	?	Urine	None
34999832	Development and Implementation of One-Step, Broad-Spectrum, High-Sensitivity Drug Screening by Tandem Mass Spectrometry in a Pediatric Population	Tesfazghi MT, Bardelmeier R, Saunders AN, Riley SM, Roper SM, Dietzen DJ.	J Appl Lab Med. 2022 Mar 2;7(2):409-420. doi: 10.1093/jalm/jfab157.	J Appl Lab Med	2022	10.1093/jalm/jfab157	In the nursery population, immunoassays over-detected the presence of THC but under-detected exposure to cocaine	Immunoassay vs LC–MS/MS	Yes	Cobas system vs C18 reversed-phase column (1.8 mm, 2.1mm_x0002_150mm)	?	?	THC, 100 ng/mL; THC-glucuronide 20 ng/mL	?	84 min total evaluation	No vs yes	?	Urine	None
35187817	Quantitative determination of five cannabinoids in blood and urine by gas chromatography tandem mass spectrometry applying automated on-line solid phase extraction	Frei P, Frauchiger S, Scheurer E, Mercer-Chalmers-Bender K.	Drug Test Anal. 2022 Jul;14(7):1223-1233. doi: 10.1002/dta.3241. Epub 2022 Feb 28.	Drug Test Anal	2022	10.1002/dta.3241	None	GC-MS/MS	Solid-phase extraction (SPE)	Optima™ 5 MS GC-capillary (length 30 m; ID 0.25 mm	WHOLE BLOOD: THC, CBD: 0.3-20 ng/mL; OH-THC: 0.3-15 ng/mL; THC-COOH, 3.0–150; CBN, 0.2–12. URINE: THC, Oh-THC, CBD: 0.3-20 ng/mL; THC-COOH, 3.0–200; CBN, 0.2–12.	No interfering signal was detected in any of the samples used to test selectivity and specificity.	0.15 ng/mL for THC, OH-THC and CBD, 0.1 ng/mL for CBN, and 1.0 ng/mL for THC-COOH	0.3 ng/mL for THC, OH-THC and CBD, 0.2 ng/mL for CBN, and 3.0 ng/mL for THC-COOH	18 min	Yes	?	Blood; Urine	None
35265983	An Enhanced LC-MS-MS Technique for Distinguishing Δ8- and Δ9-Tetrahydrocannabinol Isomers in Blood and Urine Specimens	Reber JD, Karschner EL, Seither JZ, Knittel JL, Dozier KV, Walterscheid JP.	J Anal Toxicol. 2022 Apr 21;46(4):343-349. doi: 10.1093/jat/bkac007.	J Anal Toxicol	2022	10.1093/jat/bkac007	None	LC–MS-MS	Solid-phase extraction (SPE)	Agilent Poroshell 120 EC-C18 column (100 × 2.1 mm, 2.7 μm)	2-200 ug/L	Interference is most likely caused by 11-OH-Δ8-THC	1 μg/L for Δ9-THC and Δ8-THC and 5 μg/L for Δ9-THCCOOH and Δ8-THCCOOH in both blood and urine	1 μg/L for Δ9-THC and Δ8-THC and 5 μg/L for Δ9-THCCOOH and Δ8-THCCOOH in both blood and urine	13 min	Yes	Δ8-THCCOOH matrix effects resulted in unacceptable bias in some LLOQ and ULOQ replicates.	Blood; Urine	None
35343088	Evaluation of RapidSTAT®, DrugWipe® 6S, DrugScreen® 5TK and DrugScreen® 7TR for on-site drug testing in German police roadside traffic patrol	Liut J, Bott U, Madea B, Krämer M, Maas A.	Drug Test Anal. 2022 Aug;14(8):1407-1416. doi: 10.1002/dta.3262. Epub 2022 Apr 1.	Drug Test Anal	2022	10.1002/dta.3262	None	RapidSTAT®, DrugWipe® 6S, DrugScreen® 5TK and 7TR vs GC-MS or LC-MS/MS	No and Yes	?	?	Specificities of 61-81%	?	Cut-offs: RapidSTAT®, 5 ng/mL; DrugWipe® 6S, 10 ng/mL; DrugScreen® 5TK and 7TR, 150 ng/mL	?	No vs Yes	?	Oral fluid; Urine	None
35451622	Online SPE UPLC-MS/MS method for the simultaneous determination of 33 psychoactive drugs from swab-collected human oral fluid samples	Mercier B, Scala-Bertola J, Pape E, Kolodziej A, Gibaja V, Bisch M, Jouzeau JY, Gambier N.	Anal Bioanal Chem. 2022 Jun;414(14):4203-4215. doi: 10.1007/s00216-022-04073-9. Epub 2022 Apr 22.	Anal Bioanal Chem	2022	10.1007/s00216-022-04073-9	None	UPLC‑MS/MS	Solid-phase extraction (SPE); FLOQSwabs™	Phenomenex Kinetex Biphenyl 100A™ column (100 × 2.1 mm × 2.6 μm)	1–100 ng/mL	Interfering signals were not generated from deuterated standards.	1 ng/mL	1 ng/mL	10 min	Yes	Storage at 4 °C allowed drug detection for 1 week, except for THC and remifentanil.	Oral fluid	None
35514245	Stability of drugs of abuse in synthetic oral fluid investigated using a simple "dilute and inject" method of analysis	Gavrilović I, Musenga A, Wolff K, Woffendin A, Smart A, Gong F, Harding D, Cowan D.	Drug Test Anal. 2022 Aug;14(8):1482-1490. doi: 10.1002/dta.3279. Epub 2022 May 20.	Drug Test Anal	2022	10.1002/dta.3279	None	LC–MS/MS	Yes	Waters Acquity® UPLC™ HSS T3 C18 (1.8 μm, 2.1 _x0004_ 50 mm) column	10–1000 ng/mL	?	10 ng/mL for	?	13.5 min	Yes	Significant decreases of approximately four times the rate of degradation for THC were observed at 40_x0003_C when compared with that at 20°C. THC shows the largest loss (approximately 25%) after the first freeze–thaw cycle, which may be partly due to adsorption onto glassware. Spiked SOF can be stored at 5°C for up to 1 week without significant drug concentrations loss.	Synthetic oral fluid	THC seems to be the most challenging compound to work with and the scientific literature shows variable data regarding its storage under various conditions, containers and biological matrices
35566314	Direct Quantitation of Phytocannabinoids by One-Dimensional (1)H qNMR and Two-Dimensional (1)H-(1)H COSY qNMR in Complex Natural Mixtures	Dadiotis E, Mitsis V, Melliou E, Magiatis P.	Molecules. 2022 May 5;27(9):2965. doi: 10.3390/molecules27092965.	Molecules	2022	10.3390/molecules27092965	None	1H-NMR and COSY NMR	N/A	Peak quantitation	1 mg/0.75 mL, 2 mg/0.75 mL, and 5 mg/0.75 mL.	In some complex mixtures, CBG and CBGA were present together, along with other cannabinoids and other substances from the cannabis plant, and in that case, these two peaks overlapped, such that it was difficult in some samples to quantify these two compounds separately	?	Various	?	Yes	?	N/A - Cannabis extracts	None
35580134	Simultaneous Assessment of Serum Levels and Pharmacologic Effects of Cannabinoids on Endocannabinoids and N-Acylethanolamines by Liquid Chromatography-Tandem Mass Spectrometry	Couttas TA, Boost C, Pahlisch F, Sykorova EB, Leweke JE, Koethe D, Endepols H, Rohleder C, Leweke FM.	Cannabis Cannabinoid Res. 2022 May 17. doi: 10.1089/can.2021.0181. Online ahead of print.	Cannabis Cannabinoid Res	2022	10.1089/can.2021.0181	Endogenous cannabinoids (eCBs) anandamide and 2-arachidonoylglycerol, along with their congener NAEs oleoylethanolamine and palmitoylethanolamine, and phytocannabinoids CBD, D9- THC, and 11-Nor-9-carboxy-D9-tetrahydrocannabinol	LC-MS/MS	Yes	4-µm Synergi Hydro-RP C18 column (150 · 2 mm)	eCBs (0.012–0.24pmol/mL), NAEs (0.059 pmol/mL), and phytocannabinoids (0.24–0.73 pmol/mL)	LC conditions allowed for appropriate separation of all analytes, with desirable peak shape and signal intensity to perform accurate quantification	AEA and 2-AG was 0.012 and 0.24 pmol/mL, respectively, with OEA and PEA both achieving 0.059 pmol/mL. CBD, D9-THC, and D9-THC-COOH LOD were 0.24, 0.49, and 0.73 pmol/mL, respectively	0.049 for AEA, 0.195 for OEA and PEA, 0.98 for 2-AG, 1.95 for CBD and D9-THC, and 2.93 pmol/mL for D9-THC-COOH	18 min	Yes	All analytes were within permissible variability following 3 months of storage at _x0002_20_x0002_C. However, inconsistencies to PEA (25.4%) and CBD (24.2%) were observed after multiple freezethaw cycles.	Serum	None
35585089	Indeterminacy of cannabis impairment and ∆(9)-tetrahydrocannabinol (∆(9)-THC) levels in blood and breath	Wurz GT, DeGregorio MW.	Sci Rep. 2022 May 18;12(1):8323. doi: 10.1038/s41598-022-11481-5.	Sci Rep	2022	10.1038/s41598-022-11481-5	None	LC-HRMS	Yes	?	2.5-100 mg/mL	?	?	1.0 ng/mL	?	Yes	?	Blood; Breath	None
35640884	Rapid Extraction and Qualitative Screening of 30 Drugs in Oral Fluid at Concentrations Recommended for the Investigation of DUID Cases	Coulter C, Garnier M, Moore C.	J Anal Toxicol. 2022 Oct 14;46(8):899-904. doi: 10.1093/jat/bkac031.	J Anal Toxicol	2022	10.1093/jat/bkac031	None	LC-MS/MS	Quantisal	Eclipse Plus C18 column (4.6 × 50 mm 1.8 μm)	?	There were no observed interferences from commonly encountered drugs	4 ng/mL (decision point)	?	10 min	Yes	?	Oral fluid	Also reports matrix effects, sample stability
35767245	Suitability of SoToxa® Oral Fluid Screening Over Time: Re-Examination of Drugged Driving in Wisconsin	Savage T, Sanders T, Pieters R, Miles A, Barkholtz H.	J Anal Toxicol. 2022 Oct 14;46(8):825-834. doi: 10.1093/jat/bkac047.	J Anal Toxicol	2022	10.1093/jat/bkac047	None	SoToxa vs UPLC–QToF-HRMS	Quantisal	? Vs Waters Acquity HSS C18 (2.1 mm x 150 mm) column packed with 1.8-µm particles.	?	?	Cut-off - SoToxa: 25 mg/mL; Blood: 5 ng/mL	?	~20 min	Yes	?	Oral fluid; Blood	None
35780508	Development of a Rapid Assay for On-Site THC Detection in Oral Fluid	Xiong-Hang K, Love SA.	Clin Chem. 2022 Jul 3;68(7):994. doi: 10.1093/clinchem/hvac034.	Clin Chem	2022	10.1093/clinchem/hvac034	New and Views article	The EPOCH (express probe for on-site cannabis inhalation) system consists of 3 components—a processing module, cartridge-based sensors, and smart-phone enabled detection.	No	Gold nanoparticles coated with antibodies (AuNPAB) against THC	?	?	0.17 ng/mL	?	?	?	?	Oral fluid	None
36058440	Portable biosensors for rapid on-site determination of cannabinoids in cannabis, a review	Harpaz D, Bernstein N, Namdar D, Eltzov E.	Biotechnol Adv. 2022 Dec;61:108031. doi: 10.1016/j.biotechadv.2022.108031. Epub 2022 Sep 1.	Biotechnol Adv	2022	10.1016/j.biotechadv.2022.108031	Review - Tables 1-3 have good summaries of various techniques	HPLC, GC, TLC vs portable optical biosensors (Surface-enhanced Raman spectroscopy (SERS); Fluorescence, chemiluminescence, and colorimetric-based techniques, and Lateral Flow Immunoassay (LFIA)); portable gas biosensors (Ion mobility spectrometry (IMS) and electronic nose (e-Nose) systems from metal oxide semiconductors (MOS), and portable electrochemical biosensors (Mediated (indirect), Carbon-b…	Various	Various	Various	Various	Various	Various	Various	Various	Various	Various	None
36121021	Assessment of delta-9-tetrahydrocannabinol (THC) in saliva and blood after oral administration of medical cannabis with respect to its effect on driving abilities	Trojan V, Landa L, Hrib R, Jurica J, Rychlickova J, Zvonicek V, Halamkova L, Halamek J, Demlova R, Belaskova S, Sliva J.	Physiol Res. 2022 Nov 28;71(5):703-712. doi: 10.33549/physiolres.934907. Epub 2022 Sep 19.	Physiol Res	2022	10.33549/physiolres.934907	None	DrugWipe 5 SP (saliva), GC-MS (blood)	No and Yes	Finnigan TRACE GC Ultra and Finnigan PolarisQ	?	?	?	2 ng/mL	?	No and Yes	?	Saliva; Blood	None
36279720	A new UHPLC-MS/MS method for cannabinoids determination in human plasma: A clinical tool for therapeutic drug monitoring	Manca A, Chiara F, Mula J, Palermiti A, Maiese D, Zeaiter S, De Nicolò A, Imperiale D, De Filippis G, Vischia F, De Cori D, Cusato J, D'Avolio A.	Biomed Pharmacother. 2022 Dec;156:113899. doi: 10.1016/j.biopha.2022.113899. Epub 2022 Oct 21.	Biomed Pharmacother	2022	10.1016/j.biopha.2022.113899	None	UHPLC-MS/MS	Yes	KINETEX® 2.6 μm Polar C18 100 Å LC column 100 × 2.1 mm	5–250 ng/mL	?	~0.15-0.87 (see Table 4)	5 ng/mL	10 min	Yes	Analysis showed samples were stable for 10 days when kept at 20 ◦C and up to 3 months when stored at 80 ◦C.	Plasma	None
36353497	Cannabidiol, ∆(9)-tetrahydrocannabinol, and metabolites in human blood by volumetric absorptive microsampling and LC-MS/MS following controlled administration in epilepsy patients	Pigliasco F, Malaca S, Lo Faro AF, Tini A, Cangemi G, Cafaro A, Barco S, Riva A, Pisati A, Amadori E, Striano P, Tagliabracci A, Huestis MA, Busardò FP.	Front Pharmacol. 2022 Oct 24;13:1038754. doi: 10.3389/fphar.2022.1038754. eCollection 2022.	Front Pharmacol	2022	10.3389/fphar.2022.1038754	None	LC-MS/MS	Volumetric absorptive microsampling	Waters® ACQUITYTM PREMIER UPLC® BEH C18 column (100 × 2.1 mm, 1.7 μm)	0.5–25 THC, 11-OH-THC, THCCOOH, 6-α-OH-CBD and 6-β-OH-CBD; 10–500 CBD and 7-OH-CBD; and 20–5000 7-COOH-CBD, ng/mL.	Method validation results were following the internationally established criteria	CBD 0.50; 7-OH-CBD 0.50; 7-COOH-CBD 1.10; 6-α–OH–CBD 0.10; 6-β–OH–CBD 0.10; THC 0.10; 11-OH-THC 0.10; THCCOOH 0.10	CBD 1.50; 7-OH-CBD 1.50; 7-COOH-CBD 3.50; 6-α–OH–CBD 0.25; 6-β–OH–CBD 0.25; THC 0.25; 11-OH-THC 0.25; THCCOOH 0.25	17 min	Yes	No relevant degradation was observed after any of the three freeze/thaw cycles, with differences in the initial concentration less than 15% for all the compounds under investigation. Similar results (differences from the initial concentration always lower than 15%) were obtained for the case of short-term and mid-term stability tests, confirming the validity of stored samples for analysis.	Blood	None
36367975	A Sensitive Ultrahigh-Performance Liquid Chromatography/Tandem Mass Spectrometry Method for the Simultaneous Analysis of Phytocannabinoids and Endocannabinoids in Plasma and Brain	Ahmed F, Torrens A, Mahler SV, Ferlenghi F, Huestis MA, Piomelli D.	Cannabis Cannabinoid Res. 2022 Nov 11. doi: 10.1089/can.2022.0216. Online ahead of print.	Cannabis Cannabinoid Res	2022	10.1089/can.2022.0216	None	HPLC-MS/MS	Yes	Eclipse XDB C18 (1.8 µm, 2.1 · 50 mm), monomeric bonded phase	0.02–500 ng/mL	EMR fractionation is effective in removing the matrix components that would otherwise interfere with the analysis	0.02 ng/mL for anandamide, 0.05 ng/mL for 11-OH-THC and OEA, 0.1 ng/mL for THC and CBD, 0.2 ng/mL for 11-COOH-THC, 0.5 ng/mL for 2-AG, and 1.0 ng/mL for PEA	0.05 ng/mL for anandamide, 0.1 ng/mL for 11-OHTHC and OEA, 0.2 ng/mL for THC and CBD, 0.5 ng/mL for 11-COOH-THC, 1.0 ng/mL for 2-AG, and 2.0 ng/mL for PEA	15 min	Yes	Greater resolution was obtained at 35°C, but with an unacceptable increase in separation time	Plasma; Brain	None
36214389	UHPLC-MS-MS Determination of THC, CBD and Their Metabolites in Whole Blood of Light Cannabis Smokers	Lo Faro AF, Tini A, Gottardi J, Pichini S, Carlier J, Giorgetti R, Busardò FP.	J Anal Toxicol. 2023 Jan 24;46(9):e256-e261. doi: 10.1093/jat/bkac081.	J Anal Toxicol	2023	10.1093/jat/bkac081	None	UHPLC–MS-MS	Yes	ACQUITY UPLC® BEH C18 column (length: 100 mm, internal diameter: 2.1 mm and particle size: 1.7 um)	?	?	?	0.005 to 0.01 ng/mL	8 min	Yes	The method was linear, accurate, precise and sensitive	Whole blood	Carryover, matrix effect, recovery, process efficiency and dilution integrity were also assessed
36549107	An electrochemical aptasensor for Δ(9)-tetrahydrocannabinol detection in saliva on a microfluidic platform	Kékedy-Nagy L, Perry JM, Little SR, Llorens OY, Shih SCC.	Biosens Bioelectron. 2023 Feb 15;222:114998. doi: 10.1016/j.bios.2022.114998. Epub 2022 Dec 8.	Biosens Bioelectron	2023	10.1016/j.bios.2022.114998	None	Electrochemical aptasensor	Yes and No	The selected A-18 aptamer with a 5′ C6-disulfide modification (HOC6–S–S–C6-5′-TGT CAC ATC TAC ACT GCT CGA AGG TCT TTC GTA TTT GCA TTC CTC TCT TCT TCA TTT CGA GCA ATT CAG ACA GCG TTC CC-3′ ) was synthesized by Metabion International AG, Martinsried, Germany.	0–100 nM	CBN or CBD does not produce the expected signal decrease as observed in the case of Δ9-THC	1 nM and 10 nM (saliva)	?	1 min	EMMA-Sense showed good regeneration up to 10 cycles with the freshly prepared electrode after washing the sensor with PBS for 1 min between the cycle of challenge	The regeneration of the aptasensor was exacerbated after 7 days of storage.	Saliva	None
36921120	Optimization of biochip assay for illegal substances on drug abusers' whole blood: Randox Evidence vs LC-MS/MS	Efeoglu Ozseker P, Yucel SP, Daglioglu N.	J Immunoassay Immunochem. 2023 Mar 15:1-13. doi: 10.1080/15321819.2023.2189451. Online ahead of print.	J Immunoassay Immunochem	2023	10.1080/15321819.2023.2189451	None	DOA I Plus vs LC-MS/MS	Yes	Immunoassay vs Waters XEVO TQ MS UPLC system; 50 × 2.1 mm allure PFPP column with 50-um particle size	0–200 ng/mL; 1-75 ng/mL LC-MS/MS	?	Cut-off: 15 ng/mL vs LC-MS/MS, THC/THC-COOH; 3.50/0.75 ng/mL	LC-MS/MS, THC/THC-COOH; 10.50/2.28 ng/mL	20 min	? Vs Yes	?	Blood	None
32947080	Recent developments in electrochemical detection of illicit drugs in diverse matrices	De Rycke E, Stove C, Dubruel P, De Saeger S, Beloglazova N.	Biosens Bioelectron. 2020 Dec 1;169:112579. doi: 10.1016/j.bios.2020.112579. Epub 2020 Sep 8.	Biosens Bioelectron	2020	10.1016/j.bios.2020.112579	Review	Biosensors	Various	Antibodies. Aptamers, Molecularly imprinted polymers	Various (see Table 2)	?	Various (see Table 2)	NS	Various	?	?	N/A: Plants and seized samples	None

## Sheet: PubMed, RAW
PMID	Title	Authors	Citation	First Author	Journal/Book	Publication Year	Create Date	PMCID	NIHMS ID	DOI	Detection Technique	Sensing Layer Composition	Sensitivity	Selectivity	Limit of Detection	Limit of Quantification	Detection Time	Reusability	Robustness (pH, Biofouling, Temp, Chemicals)	Body Fluid Tested
26769475	The removal of illicit drugs and morphine in two waste water treatment plants (WWTPs) under tropical conditions	Devault DA, Néfau T, Levi Y, Karolak S.	Environ Sci Pollut Res Int. 2017 Nov;24(33):25645-25655. doi: 10.1007/s11356-015-6032-z. Epub 2016 Jan 15.	Devault DA	Environ Sci Pollut Res Int	2017	2016-01-16			10.1007/s11356-015-6032-z
26780348	Sex differences in the subjective effects of oral Δ(9)-THC in cannabis users	Fogel JS, Kelly TH, Westgate PM, Lile JA.	Pharmacol Biochem Behav. 2017 Jan;152:44-51. doi: 10.1016/j.pbb.2016.01.007. Epub 2016 Jan 15.	Fogel JS	Pharmacol Biochem Behav	2017	2016-01-19	PMC4947027	NIHMS755151	10.1016/j.pbb.2016.01.007
26822791	Dronabinol increases pain threshold in patients with functional chest pain: a pilot double-blind placebo-controlled trial	Malik Z, Bayman L, Valestin J, Rizvi-Toner A, Hashmi S, Schey R.	Dis Esophagus. 2017 Feb 1;30(2):1-8. doi: 10.1111/dote.12455.	Malik Z	Dis Esophagus	2017	2016-01-30			10.1111/dote.12455
27027565	Functional effects of cannabinoids during dopaminergic specification of human neural precursors derived from induced pluripotent stem cells	Stanslowsky N, Jahn K, Venneri A, Naujock M, Haase A, Martin U, Frieling H, Wegner F.	Addict Biol. 2017 Sep;22(5):1329-1342. doi: 10.1111/adb.12394. Epub 2016 Mar 30.	Stanslowsky N	Addict Biol	2017	2016-03-31			10.1111/adb.12394
27050740	Marijuana Misadventures in Children: Exploration of a Dose-Response Relationship and Summary of Clinical Effects and Outcomes	Heizer JW, Borgelt LM, Bashqoy F, Wang GS, Reiter PD.	Pediatr Emerg Care. 2018 Jul;34(7):457-462. doi: 10.1097/PEC.0000000000000770.	Heizer JW	Pediatr Emerg Care	2018	2016-04-07			10.1097/PEC.0000000000000770
27058582	Butane Hash Oil Burns: A 7-Year Perspective on a Growing Problem	Romanowski KS, Barsun A, Kwan P, Teo EH, Palmieri TL, Sen S, Maguina P, Greenhalgh DG.	J Burn Care Res. 2017 Jan/Feb;38(1):e165-e171. doi: 10.1097/BCR.0000000000000334.	Romanowski KS	J Burn Care Res	2017	2016-04-09			10.1097/BCR.0000000000000334
27074965	Contactless decontamination of hair samples: cannabinoids	Restolho J, Barroso M, Saramago B, Dias M, Afonso CA.	Drug Test Anal. 2017 Feb;9(2):282-288. doi: 10.1002/dta.1958. Epub 2016 Apr 14.	Restolho J	Drug Test Anal	2017	2016-04-15			10.1002/dta.1958
27126842	Differential behavioral and molecular alterations upon protracted abstinence from cocaine versus morphine, nicotine, THC and alcohol	Becker JAJ, Kieffer BL, Le Merrer J.	Addict Biol. 2017 Sep;22(5):1205-1217. doi: 10.1111/adb.12405. Epub 2016 Apr 28.	Becker JAJ	Addict Biol	2017	2016-04-30	PMC5085894	NIHMS771283	10.1111/adb.12405
27133469	Substance use in individuals with mild to borderline intellectual disability: A comparison between self-report, collateral-report and biomarker analysis	VanDerNagel JE, Kiewik M, van Dijk M, Didden R, Korzilius HP, van der Palen J, Buitelaar JK, Uges DR, Koster RA, de Jong CA.	Res Dev Disabil. 2017 Apr;63:151-159. doi: 10.1016/j.ridd.2016.04.006. Epub 2016 Apr 25.	VanDerNagel JE	Res Dev Disabil	2017	2016-05-03			10.1016/j.ridd.2016.04.006
27278640	Discriminative Stimulus Properties of Phytocannabinoids, Endocannabinoids, and Synthetic Cannabinoids	Wiley JL, Owens RA, Lichtman AH.	Curr Top Behav Neurosci. 2018;39:153-173. doi: 10.1007/7854_2016_24.	Wiley JL	Curr Top Behav Neurosci	2018	2016-06-10			10.1007/7854_2016_24
27296783	Comparison of cannabinoids in hair with self-reported cannabis consumption in heavy, light and non-cannabis users	Taylor M, Lees R, Henderson G, Lingford-Hughes A, Macleod J, Sullivan J, Hickman M.	Drug Alcohol Rev. 2017 Mar;36(2):220-226. doi: 10.1111/dar.12412. Epub 2016 Jun 14.	Taylor M	Drug Alcohol Rev	2017	2016-06-15	PMC5396143		10.1111/dar.12412
27299295	Cannabinoid Poisoning by Hemp Seed Oil in a Child	Chinello M, Scommegna S, Shardlow A, Mazzoli F, De Giovanni N, Fucci N, Borgiani P, Ciccacci C, Locasciulli A, Calvani M.	Pediatr Emerg Care. 2017 May;33(5):344-345. doi: 10.1097/PEC.0000000000000780.	Chinello M	Pediatr Emerg Care	2017	2016-06-15			10.1097/PEC.0000000000000780
27327554	Impairment due to alcohol, tetrahydrocannabinol, and benzodiazepines in impaired drivers compared to experimental studies	Høiseth G, Berg-Hansen GO, Øiestad ÅM, Bachs L, Mørland J.	Traffic Inj Prev. 2017 Apr 3;18(3):244-250. doi: 10.1080/15389588.2016.1201205. Epub 2016 Jun 21.	Høiseth G	Traffic Inj Prev	2017	2016-06-22			10.1080/15389588.2016.1201205
27328899	Metabolic patterns of JWH-210, RCS-4, and THC in pig urine elucidated using LC-HR-MS/MS: Do they reflect patterns in humans?	Schaefer N, Helfer AG, Kettner M, Laschke MW, Schlote J, Ewald AH, Meyer MR, Menger MD, Maurer HH, Schmidt PH.	Drug Test Anal. 2017 Apr;9(4):613-625. doi: 10.1002/dta.1995. Epub 2016 Jun 22.	Schaefer N	Drug Test Anal	2017	2016-06-23			10.1002/dta.1995
27341312	Simultaneous quantification of major cannabinoids and metabolites in human urine and plasma by HPLC-MS/MS and enzyme-alkaline hydrolysis	Aizpurua-Olaizola O, Zarandona I, Ortiz L, Navarro P, Etxebarria N, Usobiaga A.	Drug Test Anal. 2017 Apr;9(4):626-633. doi: 10.1002/dta.1998. Epub 2016 Jun 24.	Aizpurua-Olaizola O	Drug Test Anal	2017	2016-06-25			10.1002/dta.1998
27418166	Death from respiratory diseases and temperature in Shiraz, Iran (2006-2011)	Dadbakhsh M, Khanjani N, Bahrampour A, Haghighi PS.	Int J Biometeorol. 2017 Feb;61(2):239-246. doi: 10.1007/s00484-016-1206-z. Epub 2016 Jul 14.	Dadbakhsh M	Int J Biometeorol	2017	2016-07-16			10.1007/s00484-016-1206-z
27431873	Genetic and Environmental Contributions to the Association Between Cannabis Use and Psychotic-Like Experiences in Young Adult Twins	Nesvåg R, Reichborn-Kjennerud T, Gillespie NA, Knudsen GP, Bramness JG, Kendler KS, Ystrom E.	Schizophr Bull. 2017 May 1;43(3):644-653. doi: 10.1093/schbul/sbw101.	Nesvåg R	Schizophr Bull	2017	2016-07-20	PMC5464089		10.1093/schbul/sbw101
27464485	Determination of 21 drugs in oral fluid using fully automated supported liquid extraction and UHPLC-MS/MS	Valen A, Leere Øiestad ÅM, Strand DH, Skari R, Berg T.	Drug Test Anal. 2017 May;9(5):808-823. doi: 10.1002/dta.2045. Epub 2016 Aug 19.	Valen A	Drug Test Anal	2017	2016-07-29			10.1002/dta.2045
27496769	Increase in cannabis use may indirectly affect the health status of a freshwater species	Parolini M, Castiglioni S, Magni S, Della Torre C, Binelli A.	Environ Toxicol Chem. 2017 Feb;36(2):472-479. doi: 10.1002/etc.3575. Epub 2016 Oct 5.	Parolini M	Environ Toxicol Chem	2017	2016-08-07			10.1002/etc.3575
27535292	Rapid identification of drug-type strains in Cannabis sativa using loop-mediated isothermal amplification assay	Kitamura M, Aragane M, Nakamura K, Watanabe K, Sasaki Y.	J Nat Med. 2017 Jan;71(1):86-95. doi: 10.1007/s11418-016-1031-z. Epub 2016 Aug 17.	Kitamura M	J Nat Med	2017	2016-08-19			10.1007/s11418-016-1031-z
27539096	Long-term stability of cannabinoids in oral fluid after controlled cannabis administration	Scheidweiler KB, Andersson M, Swortwood MJ, Sempio C, Huestis MA.	Drug Test Anal. 2017 Jan;9(1):143-147. doi: 10.1002/dta.2056. Epub 2016 Sep 13.	Scheidweiler KB	Drug Test Anal	2017	2016-08-20	PMC5233598	NIHMS819012	10.1002/dta.2056
27539378	Refractory OCD Due to Thalamic Infarct With Response to Dronabinol	Cooper JJ, Grant J.	J Neuropsychiatry Clin Neurosci. 2017 Winter;29(1):77-78. doi: 10.1176/appi.neuropsych.16030053. Epub 2016 Aug 19.	Cooper JJ	J Neuropsychiatry Clin Neurosci	2017	2016-08-20			10.1176/appi.neuropsych.16030053
27541956	A Judicial Perspective on Expert Testimony in Marijuana Driving Cases	Celeste MA.	J Med Toxicol. 2017 Mar;13(1):117-123. doi: 10.1007/s13181-016-0579-z. Epub 2016 Aug 19.	Celeste MA	J Med Toxicol	2017	2016-08-20	PMC5330958		10.1007/s13181-016-0579-z
27590030	Determination of cannabinoids in hemp nut products in Taiwan by HPLC-MS/MS coupled with chemometric analysis: quality evaluation and a pilot human study	Chang CW, Tung CW, Tsai CC, Wu YT, Hsu MC.	Drug Test Anal. 2017 Jun;9(6):888-897. doi: 10.1002/dta.2062. Epub 2016 Sep 29.	Chang CW	Drug Test Anal	2017	2016-09-04			10.1002/dta.2062
27617793	Sensitive determination of THC and main metabolites in human plasma by means of microextraction in packed sorbent and gas chromatography-tandem mass spectrometry	Rosado T, Fernandes L, Barroso M, Gallardo E.	J Chromatogr B Analyt Technol Biomed Life Sci. 2017 Feb 1;1043:63-73. doi: 10.1016/j.jchromb.2016.09.007. Epub 2016 Sep 6.	Rosado T	J Chromatogr B Analyt Technol Biomed Life Sci	2017	2016-09-13			10.1016/j.jchromb.2016.09.007
27618739	Don't Worry, Be Happy: Endocannabinoids and Cannabis at the Intersection of Stress and Reward	Volkow ND, Hampson AJ, Baler RD.	Annu Rev Pharmacol Toxicol. 2017 Jan 6;57:285-308. doi: 10.1146/annurev-pharmtox-010716-104615. Epub 2016 Sep 2.	Volkow ND	Annu Rev Pharmacol Toxicol	2017	2016-09-14			10.1146/annurev-pharmtox-010716-104615
27624148	Effects of tetrahydrocannabinol on balance and gait in patients with dementia: A randomised controlled crossover trial	van den Elsen GA, Tobben L, Ahmed AI, Verkes RJ, Kramers C, Marijnissen RM, Olde Rikkert MG, van der Marck MA.	J Psychopharmacol. 2017 Feb;31(2):184-191. doi: 10.1177/0269881116665357. Epub 2016 Sep 27.	van den Elsen GA	J Psychopharmacol	2017	2016-09-15			10.1177/0269881116665357
27647820	Cannabinoid disposition in oral fluid after controlled smoked, vaporized, and oral cannabis administration	Swortwood MJ, Newmeyer MN, Andersson M, Abulseoud OA, Scheidweiler KB, Huestis MA.	Drug Test Anal. 2017 Jun;9(6):905-915. doi: 10.1002/dta.2092. Epub 2016 Oct 13.	Swortwood MJ	Drug Test Anal	2017	2016-09-21	PMC5357602	NIHMS819013	10.1002/dta.2092
27660328	Medical Marijuana: Just the Beginning of a Long, Strange Trip?	Ciccone CD.	Phys Ther. 2017 Feb 1;97(2):239-248. doi: 10.2522/ptj.20160367.	Ciccone CD	Phys Ther	2017	2016-09-24			10.2522/ptj.20160367
27670094	Gonadal hormone modulation of ∆(9)-tetrahydrocannabinol-induced antinociception and metabolism in female versus male rats	Craft RM, Haas AE, Wiley JL, Yu Z, Clowers BH.	Pharmacol Biochem Behav. 2017 Jan;152:36-43. doi: 10.1016/j.pbb.2016.09.006. Epub 2016 Sep 24.	Craft RM	Pharmacol Biochem Behav	2017	2016-09-28	PMC5195865	NIHMS819477	10.1016/j.pbb.2016.09.006
27681339	Illicit Drugs in Oral Fluid: Evaluation of Two Collection Devices	Cohier C, Mégarbane B, Roussel O.	J Anal Toxicol. 2017 Jan;41(1):71-76. doi: 10.1093/jat/bkw100. Epub 2016 Sep 27.	Cohier C	J Anal Toxicol	2017	2016-09-30			10.1093/jat/bkw100
27681340	Determination of Drugs of Abuse in a Single Sample of Human Teeth by a Gas Chromatography-Mass Spectrometry Method	Ottaviani G, Cameriere R, Cippitelli M, Froldi R, Tassoni G, Zampi M, Cingolani M.	J Anal Toxicol. 2017 Jan;41(1):32-36. doi: 10.1093/jat/bkw105. Epub 2016 Sep 27.	Ottaviani G	J Anal Toxicol	2017	2016-09-30			10.1093/jat/bkw105
27681343	A Fast and Comprehensive Analysis of 32 Synthetic Cannabinoids Using Agilent Triple Quadrupole LC-MS-MS	Borg D, Tverdovsky A, Stripp R.	J Anal Toxicol. 2017 Jan;41(1):6-16. doi: 10.1093/jat/bkw104. Epub 2016 Sep 27.	Borg D	J Anal Toxicol	2017	2016-09-30			10.1093/jat/bkw104
27686239	Interpretation of Workplace Tests for Cannabinoids	Kulig K.	J Med Toxicol. 2017 Mar;13(1):106-110. doi: 10.1007/s13181-016-0587-z. Epub 2016 Sep 29.	Kulig K	J Med Toxicol	2017	2016-10-01	PMC5330962		10.1007/s13181-016-0587-z
27719666	Cannabis: A Treasure Trove or Pandora's Box?	Solymosi K, Köfalvi A.	Mini Rev Med Chem. 2017;17(13):1223-1291. doi: 10.2174/1389557516666161004162133.	Solymosi K	Mini Rev Med Chem	2017	2016-10-11			10.2174/1389557516666161004162133
27720917	Tetrahydrocannabinol Does Not Reduce Pain in Patients With Chronic Abdominal Pain in a Phase 2 Placebo-controlled Study	de Vries M, van Rijckevorsel DCM, Vissers KCP, Wilder-Smith OHG, van Goor H; Pain and Nociception Neuroscience Research Group.	Clin Gastroenterol Hepatol. 2017 Jul;15(7):1079-1086.e4. doi: 10.1016/j.cgh.2016.09.147. Epub 2016 Oct 5.	de Vries M	Clin Gastroenterol Hepatol	2017	2016-10-11			10.1016/j.cgh.2016.09.147
27732768	Assessing cannabis consumption frequency: Is the combined use of free and glucuronidated THCCOOH blood levels of diagnostic utility?	Hädener M, Martin Fabritius M, König S, Giroud C, Weinmann W.	Drug Test Anal. 2017 Jul;9(7):1043-1051. doi: 10.1002/dta.2114. Epub 2016 Nov 14.	Hädener M	Drug Test Anal	2017	2016-10-13			10.1002/dta.2114
27769613	Synthetic Cannabinoid Abuse Resulting in ST-Segment Elevation Myocardial Infarction Requiring Percutaneous Coronary Intervention	Hamilton RJ, Keyfes V, Banka SS.	J Emerg Med. 2017 Apr;52(4):496-498. doi: 10.1016/j.jemermed.2016.09.023. Epub 2016 Oct 19.	Hamilton RJ	J Emerg Med	2017	2016-10-23			10.1016/j.jemermed.2016.09.023
27769788	Cannabinoid receptor 2 activation restricts fibrosis and alleviates hydrocephalus after intraventricular hemorrhage	Tan Q, Chen Q, Feng Z, Shi X, Tang J, Tao Y, Jiang B, Tan L, Feng H, Zhu G, Yang Y, Chen Z.	Brain Res. 2017 Jan 1;1654(Pt A):24-33. doi: 10.1016/j.brainres.2016.10.016. Epub 2016 Oct 18.	Tan Q	Brain Res	2017	2016-10-23			10.1016/j.brainres.2016.10.016
27783890	Reply to Restolho et al. 'Contactless decontamination of hair samples: cannabinoids'	Moosmann B, Auwärter V.	Drug Test Anal. 2017 Feb;9(2):289-290. doi: 10.1002/dta.2125. Epub 2016 Nov 18.	Moosmann B	Drug Test Anal	2017	2016-10-27			10.1002/dta.2125
27798073	Drugged Drivers Blood Concentrations in England and Wales Prior to the Introduction of Per Se Limits	Rooney B, Gouveia GJ, Isles N, Lawrence L, Brodie T, Grahovac Z, Chamberlain M, Trotter G.	J Anal Toxicol. 2017 Mar 1;41(2):140-145. doi: 10.1093/jat/bkw109.	Rooney B	J Anal Toxicol	2017	2016-11-01			10.1093/jat/bkw109
27798074	Stability of Tetrahydrocannabinol and Cannabidiol in Prepared Quality Control Medible Brownies	Wolf CE, Poklis JL, Poklis A.	J Anal Toxicol. 2017 Mar 1;41(2):153-157. doi: 10.1093/jat/bkw114.	Wolf CE	J Anal Toxicol	2017	2016-11-01	PMC5412015		10.1093/jat/bkw114
27798077	A Fatality Related to the Synthetic Opioid U-47700: Postmortem Concentration Distribution	McIntyre IM, Gary RD, Joseph S, Stabley R.	J Anal Toxicol. 2017 Mar 1;41(2):158-160. doi: 10.1093/jat/bkw124.	McIntyre IM	J Anal Toxicol	2017	2016-11-01			10.1093/jat/bkw124
27804883	Pros and Cons of Medical Cannabis use by People with Chronic Brain Disorders	Suryadevara U, Bruijnzeel DM, Nuthi M, Jagnarine DA, Tandon R, Bruijnzeel AW.	Curr Neuropharmacol. 2017;15(6):800-814. doi: 10.2174/1570159X14666161101095325.	Suryadevara U	Curr Neuropharmacol	2017	2016-11-03	PMC5652027		10.2174/1570159X14666161101095325
27815614	Cannabinoids assessment in plasma and urine by high performance liquid chromatography-tandem mass spectrometry after molecularly imprinted polymer microsolid-phase extraction	Sánchez-González J, Salgueiro-Fernández R, Cabarcos P, Bermejo AM, Bermejo-Barrera P, Moreda-Piñeiro A.	Anal Bioanal Chem. 2017 Feb;409(5):1207-1220. doi: 10.1007/s00216-016-0046-3. Epub 2016 Nov 4.	Sánchez-González J	Anal Bioanal Chem	2017	2016-11-06			10.1007/s00216-016-0046-3
27834001	Thorax-to-head ratio and defect diameter-to-head ratio in giant omphaloceles as predictor for fetal outcome	Diemon N, Funke K, Möllers M, Hammer K, Steinhard J, Sauerland C, Müller V, Klockenbusch W, Schmitz R.	Arch Gynecol Obstet. 2017 Feb;295(2):325-330. doi: 10.1007/s00404-016-4236-1. Epub 2016 Nov 11.	Diemon N	Arch Gynecol Obstet	2017	2016-11-12			10.1007/s00404-016-4236-1
27834143	Distribution of Synthetic Cannabinoids JWH-210, RCS-4 and Δ 9-Tetrahydrocannabinol After Intravenous Administration to Pigs	Schaefer N, Kettner M, Laschke MW, Schlote J, Ewald AH, Menger MD, Maurer HH, Schmidt PH.	Curr Neuropharmacol. 2017;15(5):713-723. doi: 10.2174/1570159X15666161111114214.	Schaefer N	Curr Neuropharmacol	2017	2016-11-12	PMC5771047		10.2174/1570159X15666161111114214
27862053	Fluorescence-based lateral flow assays for rapid oral fluid roadside detection of cannabis use	Plouffe BD, Murthy SK.	Electrophoresis. 2017 Feb;38(3-4):501-506. doi: 10.1002/elps.201600075. Epub 2016 Nov 28.	Plouffe BD	Electrophoresis	2017	2016-11-19			10.1002/elps.201600075
27866486	The effects of cannabis use on salience attribution: a systematic review	Wijayendran SB, O'Neill A, Bhattacharyya S.	Acta Neuropsychiatr. 2018 Feb;30(1):43-57. doi: 10.1017/neu.2016.58. Epub 2016 Nov 21.	Wijayendran SB	Acta Neuropsychiatr	2018	2016-11-22	PMC5489077	EMS71844	10.1017/neu.2016.58
27870984	Prevalence and molecular characterization of Clostridium difficile isolates from a pig slaughterhouse, pork, and humans in Taiwan	Wu YC, Chen CM, Kuo CJ, Lee JJ, Chen PC, Chang YC, Chen TH.	Int J Food Microbiol. 2017 Feb 2;242:37-44. doi: 10.1016/j.ijfoodmicro.2016.11.010. Epub 2016 Nov 12.	Wu YC	Int J Food Microbiol	2017	2016-11-22			10.1016/j.ijfoodmicro.2016.11.010
27890824	Evaluating a switch from meconium to umbilical cord tissue for newborn drug testing: A retrospective study at an academic medical center	Palmer KL, Wood KE, Krasowski MD.	Clin Biochem. 2017 Apr;50(6):255-261. doi: 10.1016/j.clinbiochem.2016.11.026. Epub 2016 Nov 24.	Palmer KL	Clin Biochem	2017	2016-11-29			10.1016/j.clinbiochem.2016.11.026
27899748	Cannabinoid Type-2 Receptor Drives Neurogenesis and Improves Functional Outcome After Stroke	Bravo-Ferrer I, Cuartero MI, Zarruk JG, Pradillo JM, Hurtado O, Romera VG, Díaz-Alonso J, García-Segura JM, Guzmán M, Lizasoain I, Galve-Roperh I, Moro MA.	Stroke. 2017 Jan;48(1):204-212. doi: 10.1161/STROKEAHA.116.014793. Epub 2016 Nov 29.	Bravo-Ferrer I	Stroke	2017	2016-12-01			10.1161/STROKEAHA.116.014793
27904961	Muscle elastography: a new imaging technique for multiple sclerosis spasticity measurement	Illomei G, Spinicci G, Locci E, Marrosu MG.	Neurol Sci. 2017 Mar;38(3):433-439. doi: 10.1007/s10072-016-2780-x. Epub 2016 Nov 30.	Illomei G	Neurol Sci	2017	2016-12-02			10.1007/s10072-016-2780-x
27905004	Ocular Disposition of ∆(8)-Tetrahydrocannabinol from Various Topical Ophthalmic Formulations	Punyamurthula NS, Adelli GR, Gul W, Repka MA, ElSohly MA, Majumdar S.	AAPS PharmSciTech. 2017 Aug;18(6):1936-1945. doi: 10.1208/s12249-016-0672-2. Epub 2016 Nov 30.	Punyamurthula NS	AAPS PharmSciTech	2017	2016-12-02	PMC5629008	NIHMS902939	10.1208/s12249-016-0672-2
27909842	The relationship between nernst equilibrium variability and the multifractality of interspike intervals in the hippocampus	Meier SR, Lancaster JL, Fetterhoff D, Kraft RA, Hampson RE, Starobin JM.	J Comput Neurosci. 2017 Apr;42(2):167-175. doi: 10.1007/s10827-016-0633-5. Epub 2016 Dec 1.	Meier SR	J Comput Neurosci	2017	2016-12-03			10.1007/s10827-016-0633-5
27911435	Detecting biomarkers of secondhand marijuana smoke in young children	Wilson KM, Torok MR, Wei B, Wang L, Robinson M, Sosnoff CS, Blount BC.	Pediatr Res. 2017 Apr;81(4):589-592. doi: 10.1038/pr.2016.261. Epub 2016 Dec 2.	Wilson KM	Pediatr Res	2017	2016-12-03	PMC5701510	NIHMS920676	10.1038/pr.2016.261
27957741	Quantitative Determination of Cannabinoids in Cannabis and Cannabis Products Using Ultra-High-Performance Supercritical Fluid Chromatography and Diode Array/Mass Spectrometric Detection	Wang M, Wang YH, Avula B, Radwan MM, Wanas AS, Mehmedic Z, van Antwerp J, ElSohly MA, Khan IA.	J Forensic Sci. 2017 May;62(3):602-611. doi: 10.1111/1556-4029.13341. Epub 2016 Dec 13.	Wang M	J Forensic Sci	2017	2016-12-14			10.1111/1556-4029.13341
27965084	Cannabinoid modulation of zebrafish fear learning and its functional analysis investigated by c-Fos expression	Ruhl T, Zeymer M, von der Emde G.	Pharmacol Biochem Behav. 2017 Feb;153:18-31. doi: 10.1016/j.pbb.2016.12.005. Epub 2016 Dec 10.	Ruhl T	Pharmacol Biochem Behav	2017	2016-12-15			10.1016/j.pbb.2016.12.005
27979929	Comparative Evaluation of Drug Deposition in Hair Samples Collected from Different Anatomical Body Sites	Tzatzarakis MN, Alegakis AK, Kavvalakis MP, Vakonaki E, Stivaktakis PD, Kanaki K, Vardavas AI, Barbounis EG, Tsatsakis AM.	J Anal Toxicol. 2017 Apr 1;41(3):214-223. doi: 10.1093/jat/bkw127.	Tzatzarakis MN	J Anal Toxicol	2017	2016-12-17			10.1093/jat/bkw127
27986515	An assessment of sex differences in Δ(9)-tetrahydrocannabinol (THC) taste and place conditioning	Hempel BJ, Wakeford AG, Nelson KH, Clasen MM, Woloshchuk CJ, Riley AL.	Pharmacol Biochem Behav. 2017 Feb;153:69-75. doi: 10.1016/j.pbb.2016.11.006. Epub 2016 Dec 13.	Hempel BJ	Pharmacol Biochem Behav	2017	2016-12-18			10.1016/j.pbb.2016.11.006
27988076	Electrospun biocompatible Chitosan/MIL-101 (Fe) composite nanofibers for solid-phase extraction of (Δ)9-tetrahydrocannabinol in whole blood samples using Box-Behnken experimental design	Asiabi M, Mehdinia A, Jabbari A.	J Chromatogr A. 2017 Jan 6;1479:71-80. doi: 10.1016/j.chroma.2016.12.024. Epub 2016 Dec 12.	Asiabi M	J Chromatogr A	2017	2016-12-19			10.1016/j.chroma.2016.12.024
27988160	Vascular surgeon-hospitalist comanagement improves in-hospital mortality at the expense of increased in-hospital cost	Tadros RO, Tardiff ML, Faries PL, Stoner M, Png CY, Kaplan D, Vouyouka AG, Marin ML.	J Vasc Surg. 2017 Mar;65(3):819-825. doi: 10.1016/j.jvs.2016.09.042. Epub 2016 Dec 14.	Tadros RO	J Vasc Surg	2017	2016-12-19			10.1016/j.jvs.2016.09.042
27988480	Simultaneous quantitation of cytokeratin-19 fragment and carcinoembryonic antigen in human serum via quantum dot-doped nanoparticles	Chen Z, Liang R, Guo X, Liang J, Deng Q, Li M, An T, Liu T, Wu Y.	Biosens Bioelectron. 2017 May 15;91:60-65. doi: 10.1016/j.bios.2016.12.036. Epub 2016 Dec 13.	Chen Z	Biosens Bioelectron	2017	2016-12-19			10.1016/j.bios.2016.12.036
28007679	Ten-year analysis of hepatitis-related papers in the Middle East: a web of science-based scientometric study	Rezaee Zavareh MS, Alavian SM.	Turk J Gastroenterol. 2017 Jan;28(1):20-25. doi: 10.5152/tjg.2016.0572. Epub 2016 Dec 23.	Rezaee Zavareh MS	Turk J Gastroenterol	2017	2016-12-24			10.5152/tjg.2016.0572
28043732	Interactions between cannabidiol and Δ(9)-THC following acute and repeated dosing: Rebound hyperactivity, sensorimotor gating and epigenetic and neuroadaptive changes in the mesolimbic pathway	Todd SM, Zhou C, Clarke DJ, Chohan TW, Bahceci D, Arnold JC.	Eur Neuropsychopharmacol. 2017 Feb;27(2):132-145. doi: 10.1016/j.euroneuro.2016.12.004. Epub 2016 Dec 31.	Todd SM	Eur Neuropsychopharmacol	2017	2017-01-04			10.1016/j.euroneuro.2016.12.004
28045021	Cannabinoid CB(2) receptor ligand profiling reveals biased signalling and off-target activity	Soethoudt M, Grether U, Fingerle J, Grim TW, Fezza F, de Petrocellis L, Ullmer C, Rothenhäusler B, Perret C, van Gils N, Finlay D, MacDonald C, Chicca A, Gens MD, Stuart J, de Vries H, Mastrangelo N, Xia L, Alachouzos G, Baggelaar MP, Martella A, Mock ED, Deng H, Heitman LH, Connor M, Di Marzo V, Gertsch J, Lichtman AH, Maccarrone M, Pacher P, Glass M, van der Stelt M.	Nat Commun. 2017 Jan 3;8:13958. doi: 10.1038/ncomms13958.	Soethoudt M	Nat Commun	2017	2017-01-04	PMC5216056		10.1038/ncomms13958
28059083	Behavioral Determinants of Cannabinoid Self-Administration in Old World Monkeys	John WS, Martin TJ, Nader MA.	Neuropsychopharmacology. 2017 Jun;42(7):1522-1530. doi: 10.1038/npp.2017.2. Epub 2017 Jan 6.	John WS	Neuropsychopharmacology	2017	2017-01-07	PMC5436120		10.1038/npp.2017.2
28069869	Determination of ∆-9-Tetrahydrocannabinol (THC), 11-hydroxy-THC, 11-nor-9-carboxy-THC and Cannabidiol in Human Plasma using Gas Chromatography-Tandem Mass Spectrometry	Andrenyak DM, Moody DE, Slawson MH, O'Leary DS, Haney M.	J Anal Toxicol. 2017 May 1;41(4):277-288. doi: 10.1093/jat/bkw136.	Andrenyak DM	J Anal Toxicol	2017	2017-01-11	PMC5412026		10.1093/jat/bkw136
28072907	Symptomatic treatments for amyotrophic lateral sclerosis/motor neuron disease	Ng L, Khan F, Young CA, Galea M.	Cochrane Database Syst Rev. 2017 Jan 10;1(1):CD011776. doi: 10.1002/14651858.CD011776.pub2.	Ng L	Cochrane Database Syst Rev	2017	2017-01-11	PMC6469543		10.1002/14651858.CD011776.pub2
28088032	Oral cannabidiol does not produce a signal for abuse liability in frequent marijuana smokers	Babalonis S, Haney M, Malcolm RJ, Lofwall MR, Votaw VR, Sparenborg S, Walsh SL.	Drug Alcohol Depend. 2017 Mar 1;172:9-13. doi: 10.1016/j.drugalcdep.2016.11.030. Epub 2016 Dec 14.	Babalonis S	Drug Alcohol Depend	2017	2017-01-15	PMC5361620	NIHMS850406	10.1016/j.drugalcdep.2016.11.030
28088044	Dried haematic microsamples and LC-MS/MS for the analysis of natural and synthetic cannabinoids	Protti M, Rudge J, Sberna AE, Gerra G, Mercolini L.	J Chromatogr B Analyt Technol Biomed Life Sci. 2017 Feb 15;1044-1045:77-86. doi: 10.1016/j.jchromb.2016.12.038. Epub 2016 Dec 30.	Protti M	J Chromatogr B Analyt Technol Biomed Life Sci	2017	2017-01-15			10.1016/j.jchromb.2016.12.038
28089286	Historical perspective on the medical use of cannabis for epilepsy: Ancient times to the 1980s	Friedman D, Sirven JI.	Epilepsy Behav. 2017 May;70(Pt B):298-301. doi: 10.1016/j.yebeh.2016.11.033. Epub 2017 Jan 12.	Friedman D	Epilepsy Behav	2017	2017-01-17			10.1016/j.yebeh.2016.11.033
28093016	Acute and residual effects in adolescent rats resulting from exposure to the novel synthetic cannabinoids AB-PINACA and AB-FUBINACA	Kevin RC, Wood KE, Stuart J, Mitchell AJ, Moir M, Banister SD, Kassiou M, McGregor IS.	J Psychopharmacol. 2017 Jun;31(6):757-769. doi: 10.1177/0269881116684336. Epub 2017 Jan 16.	Kevin RC	J Psychopharmacol	2017	2017-01-18			10.1177/0269881116684336
28107684	Non-invasive brain stimulation targeting the right fusiform gyrus selectively increases working memory for faces	Brunyé TT, Moran JM, Holmes A, Mahoney CR, Taylor HA.	Brain Cogn. 2017 Apr;113:32-39. doi: 10.1016/j.bandc.2017.01.006. Epub 2017 Jan 17.	Brunyé TT	Brain Cogn	2017	2017-01-21			10.1016/j.bandc.2017.01.006
28109780	Neuroimaging studies towards understanding the central effects of pharmacological cannabis products on patients with epilepsy	Allendorfer JB, Szaflarski JP.	Epilepsy Behav. 2017 May;70(Pt B):349-354. doi: 10.1016/j.yebeh.2016.11.020. Epub 2017 Jan 18.	Allendorfer JB	Epilepsy Behav	2017	2017-01-23			10.1016/j.yebeh.2016.11.020
28112544	Roadside survey on alcohol and drug use among drivers in the Arctic county of Finnmark (Norway)	Jamt REG, Gjerde H, Normann PT, Bogstrand ST.	Traffic Inj Prev. 2017 Oct 3;18(7):681-687. doi: 10.1080/15389588.2017.1283027. Epub 2017 Jan 23.	Jamt REG	Traffic Inj Prev	2017	2017-01-24			10.1080/15389588.2017.1283027
28119266	Drugs in hair. Part I. Metabolisms of major drug classes	White RM.	Forensic Sci Rev. 2017 Jan;29(1):23-55.	White RM	Forensic Sci Rev	2017	2017-01-26
28120229	Phytochemistry of Cannabis sativa L	ElSohly MA, Radwan MM, Gul W, Chandra S, Galal A.	Prog Chem Org Nat Prod. 2017;103:1-36. doi: 10.1007/978-3-319-45541-9_1.	ElSohly MA	Prog Chem Org Nat Prod	2017	2017-01-26			10.1007/978-3-319-45541-9_1
28120232	Molecular Targets of the Phytocannabinoids: A Complex Picture	Morales P, Hurst DP, Reggio PH.	Prog Chem Org Nat Prod. 2017;103:103-131. doi: 10.1007/978-3-319-45541-9_4.	Morales P	Prog Chem Org Nat Prod	2017	2017-01-26	PMC5345356	NIHMS849724	10.1007/978-3-319-45541-9_4
28122323	Topical application of THC containing products is not able to cause positive cannabinoid finding in blood or urine	Hess C, Krämer M, Madea B.	Forensic Sci Int. 2017 Mar;272:68-71. doi: 10.1016/j.forsciint.2017.01.008. Epub 2017 Jan 16.	Hess C	Forensic Sci Int	2017	2017-01-26			10.1016/j.forsciint.2017.01.008
28122324	A study of cannabis potency in France over a 25 years period (1992-2016)	Dujourdy L, Besacier F.	Forensic Sci Int. 2017 Mar;272:72-80. doi: 10.1016/j.forsciint.2017.01.007. Epub 2017 Jan 16.	Dujourdy L	Forensic Sci Int	2017	2017-01-26			10.1016/j.forsciint.2017.01.007
28124470	Cannabinoid concentrations in Canada's regulated medical cannabis industry	Mammen G, de Freitas L, Rehm J, Rueda S.	Addiction. 2017 Apr;112(4):730-732. doi: 10.1111/add.13738. Epub 2017 Jan 25.	Mammen G	Addiction	2017	2017-01-27			10.1111/add.13738
28127623	Regulation of cannabinoid CB(2) receptor constitutive activity in vivo: repeated treatments with inverse agonists reverse the acute activation of JNK and associated apoptotic signaling in mouse brain	Salort G, Álvaro-Bartolomé M, García-Sevilla JA.	Psychopharmacology (Berl). 2017 Mar;234(6):925-941. doi: 10.1007/s00213-017-4537-5. Epub 2017 Jan 26.	Salort G	Psychopharmacology (Berl)	2017	2017-01-28			10.1007/s00213-017-4537-5
28129475	Risk of Myocardial Infarction and Stroke in Newly Diagnosed Systemic Lupus Erythematosus: A General Population-Based Study	Aviña-Zubieta JA, To F, Vostretsova K, De Vera M, Sayre EC, Esdaile JM.	Arthritis Care Res (Hoboken). 2017 Jun;69(6):849-856. doi: 10.1002/acr.23018. Epub 2017 May 9.	Aviña-Zubieta JA	Arthritis Care Res (Hoboken)	2017	2017-01-28			10.1002/acr.23018
28138268	Effect of food on the pharmacokinetics of dronabinol oral solution versus dronabinol capsules in healthy volunteers	Oh DA, Parikh N, Khurana V, Cognata Smith C, Vetticaden S.	Clin Pharmacol. 2017 Jan 11;9:9-17. doi: 10.2147/CPAA.S119676. eCollection 2017.	Oh DA	Clin Pharmacol	2017	2017-02-01	PMC5238805		10.2147/CPAA.S119676
28138895	The Impact of CB2 Receptor Ligands on the MK-801-Induced Hyperactivity in Mice	Kruk-Slomka M, Banaszkiewicz I, Biala G.	Neurotox Res. 2017 Apr;31(3):410-420. doi: 10.1007/s12640-017-9702-4. Epub 2017 Jan 30.	Kruk-Slomka M	Neurotox Res	2017	2017-02-01	PMC5360834		10.1007/s12640-017-9702-4
28138971	Evaluation of divided attention psychophysical task performance and effects on pupil sizes following smoked, vaporized and oral cannabis administration	Newmeyer MN, Swortwood MJ, Taylor ME, Abulseoud OA, Woodward TH, Huestis MA.	J Appl Toxicol. 2017 Aug;37(8):922-932. doi: 10.1002/jat.3440. Epub 2017 Jan 31.	Newmeyer MN	J Appl Toxicol	2017	2017-02-01			10.1002/jat.3440
28145799	"It Takes Longer, but When It Hits You It Hits You!": Videos About Marijuana Edibles on YouTube	Krauss MJ, Sowles SJ, Stelzer-Monahan HE, Bierut T, Cavazos-Rehg PA.	Subst Use Misuse. 2017 May 12;52(6):709-716. doi: 10.1080/10826084.2016.1253749. Epub 2017 Feb 1.	Krauss MJ	Subst Use Misuse	2017	2017-02-02	PMC5502544	NIHMS870404	10.1080/10826084.2016.1253749
28153531	A selective CB2R agonist (JWH133) restores neuronal circuit after Germinal Matrix Hemorrhage in the preterm via CX3CR1(+) microglia	Tang J, Miao H, Jiang B, Chen Q, Tan L, Tao Y, Zhang J, Gao F, Feng H, Zhu G, Chen Z.	Neuropharmacology. 2017 Jun;119:157-169. doi: 10.1016/j.neuropharm.2017.01.027. Epub 2017 Jan 30.	Tang J	Neuropharmacology	2017	2017-02-04			10.1016/j.neuropharm.2017.01.027
28154257	Antibody Fragments for On-Site Testing of Cannabinoids Generated via in Vitro Affinity Maturation	Morita I, Oyama H, Yasuo M, Matsuda K, Katagi K, Ito A, Tatsuda H, Tanaka H, Morimoto S, Kobayashi N.	Biol Pharm Bull. 2017;40(2):174-181. doi: 10.1248/bpb.b16-00669.	Morita I	Biol Pharm Bull	2017	2017-02-04			10.1248/bpb.b16-00669
28158482	Pharmacokinetic Profile of Oral Cannabis in Humans: Blood and Oral Fluid Disposition and Relation to Pharmacodynamic Outcomes	Vandrey R, Herrmann ES, Mitchell JM, Bigelow GE, Flegel R, LoDico C, Cone EJ.	J Anal Toxicol. 2017 Mar 1;41(2):83-99. doi: 10.1093/jat/bkx012.	Vandrey R	J Anal Toxicol	2017	2017-02-04	PMC5890870		10.1093/jat/bkx012
28161834	Cannabinoid Receptors in Regulating the GI Tract: Experimental Evidence and Therapeutic Relevance	Taschler U, Hasenoehrl C, Storr M, Schicho R.	Handb Exp Pharmacol. 2017;239:343-362. doi: 10.1007/164_2016_105.	Taschler U	Handb Exp Pharmacol	2017	2017-02-06			10.1007/164_2016_105
28162792	Synthetic Pot: Not Your Grandfather's Marijuana	Ford BM, Tai S, Fantegrossi WE, Prather PL.	Trends Pharmacol Sci. 2017 Mar;38(3):257-276. doi: 10.1016/j.tips.2016.12.003. Epub 2017 Feb 2.	Ford BM	Trends Pharmacol Sci	2017	2017-02-07	PMC5329767	NIHMS847537	10.1016/j.tips.2016.12.003
28167229	Population pharmacokinetics model of THC used by pulmonary route in occasional cannabis smokers	Marsot A, Audebert C, Attolini L, Lacarelle B, Micallef J, Blin O.	J Pharmacol Toxicol Methods. 2017 May-Jun;85:49-54. doi: 10.1016/j.vascn.2017.02.003. Epub 2017 Feb 4.	Marsot A	J Pharmacol Toxicol Methods	2017	2017-02-08			10.1016/j.vascn.2017.02.003
28174327	Stroke With Unknown Time of Symptom Onset: Baseline Clinical and Magnetic Resonance Imaging Data of the First Thousand Patients in WAKE-UP (Efficacy and Safety of MRI-Based Thrombolysis in Wake-Up Stroke: A Randomized, Doubleblind, Placebo-Controlled Trial)	Thomalla G, Boutitie F, Fiebach JB, Simonsen CZ, Nighoghossian N, Pedraza S, Lemmens R, Roy P, Muir KW, Ebinger M, Ford I, Cheng B, Galinovic I, Cho TH, Puig J, Thijs V, Endres M, Fiehler J, Gerloff C; WAKE-UP Investigators.	Stroke. 2017 Mar;48(3):770-773. doi: 10.1161/STROKEAHA.116.015233. Epub 2017 Feb 7.	Thomalla G	Stroke	2017	2017-02-09			10.1161/STROKEAHA.116.015233
28176545	Rapid quantification of free and glucuronidated THCCOOH in urine using coated well plates and LC-MS/MS analysis	Hädener M, Weinmann W, van Staveren DR, König S.	Bioanalysis. 2017 Mar;9(5):485-496. doi: 10.4155/bio-2016-0281. Epub 2017 Feb 8.	Hädener M	Bioanalysis	2017	2017-02-09			10.4155/bio-2016-0281
28181552	MicroRNA-100 is involved in shrimp immune response to white spot syndrome virus (WSSV) and Vibrio alginolyticus infection	Wang Z, Zhu F.	Sci Rep. 2017 Feb 9;7:42334. doi: 10.1038/srep42334.	Wang Z	Sci Rep	2017	2017-02-10	PMC5299417		10.1038/srep42334
28188044	Cannabinoids in treatment-resistant epilepsy: A review	O'Connell BK, Gloss D, Devinsky O.	Epilepsy Behav. 2017 May;70(Pt B):341-348. doi: 10.1016/j.yebeh.2016.11.012. Epub 2017 Feb 8.	O'Connell BK	Epilepsy Behav	2017	2017-02-12			10.1016/j.yebeh.2016.11.012
28188234	Are THC Levels in Oral Fluids and Blood Plasma Comparable after Oral Ingestion of Edibles Containing Cannabis or THC?	Madras BK.	Clin Chem. 2017 Mar;63(3):629-631. doi: 10.1373/clinchem.2016.269795. Epub 2017 Feb 10.	Madras BK	Clin Chem	2017	2017-02-12			10.1373/clinchem.2016.269795
28188235	Cannabis Edibles: Blood and Oral Fluid Cannabinoid Pharmacokinetics and Evaluation of Oral Fluid Screening Devices for Predicting Δ(9)-Tetrahydrocannabinol in Blood and Oral Fluid following Cannabis Brownie Administration	Newmeyer MN, Swortwood MJ, Andersson M, Abulseoud OA, Scheidweiler KB, Huestis MA.	Clin Chem. 2017 Mar;63(3):647-662. doi: 10.1373/clinchem.2016.265371. Epub 2017 Feb 10.	Newmeyer MN	Clin Chem	2017	2017-02-12			10.1373/clinchem.2016.265371
28189366	Effects on Spasticity and Neuropathic Pain of an Oral Formulation of Δ9-tetrahydrocannabinol in Patients WithProgressive Multiple Sclerosis	van Amerongen G, Kanhai K, Baakman AC, Heuberger J, Klaassen E, Beumer TL, Strijers RLM, Killestein J, van Gerven J, Cohen A, Groeneveld GJ.	Clin Ther. 2018 Sep;40(9):1467-1482. doi: 10.1016/j.clinthera.2017.01.016. Epub 2017 Feb 9.	van Amerongen G	Clin Ther	2018	2017-02-13			10.1016/j.clinthera.2017.01.016
28190698	Therapeutic effects of cannabinoids in animal models of seizures, epilepsy, epileptogenesis, and epilepsy-related neuroprotection	Rosenberg EC, Patra PH, Whalley BJ.	Epilepsy Behav. 2017 May;70(Pt B):319-327. doi: 10.1016/j.yebeh.2016.11.006. Epub 2017 Feb 9.	Rosenberg EC	Epilepsy Behav	2017	2017-02-14	PMC5651410	NIHMS912701	10.1016/j.yebeh.2016.11.006
28192758	Ultra-high performance liquid chromatography tandem mass-spectrometry for simple and simultaneous quantification of cannabinoids	Jamwal R, Topletz AR, Ramratnam B, Akhlaghi F.	J Chromatogr B Analyt Technol Biomed Life Sci. 2017 Mar 24;1048:10-18. doi: 10.1016/j.jchromb.2017.02.007. Epub 2017 Feb 6.	Jamwal R	J Chromatogr B Analyt Technol Biomed Life Sci	2017	2017-02-14	PMC5697720	NIHMS851836	10.1016/j.jchromb.2017.02.007
28193575	Applying sewage epidemiology approach to estimate illicit drug consumption in a tropical context: Bias related to sewage temperature and pH	Devault DA, Lévi Y, Karolak S.	Sci Total Environ. 2017 Apr 15;584-585:252-258. doi: 10.1016/j.scitotenv.2017.01.114. Epub 2017 Feb 10.	Devault DA	Sci Total Environ	2017	2017-02-15			10.1016/j.scitotenv.2017.01.114
28196878	Global Characterization of Protein Secretion from Human Macrophages Following Non-canonical Caspase-4/5 Inflammasome Activation	Lorey MB, Rossi K, Eklund KK, Nyman TA, Matikainen S.	Mol Cell Proteomics. 2017 Apr;16(4 suppl 1):S187-S199. doi: 10.1074/mcp.M116.064840. Epub 2017 Feb 14.	Lorey MB	Mol Cell Proteomics	2017	2017-02-16	PMC5393394		10.1074/mcp.M116.064840
28201761	Evaluation of an Automated Reader and Color Interpretation-Based Immunoassays for Multiplexed Drug-of-Abuse Testing in Urine	Kim SY, Kim H, Park Y, Lim J, Kim J, Koo SH, Kwon GC.	J Anal Toxicol. 2017 Jun 1;41(5):412-420. doi: 10.1093/jat/bkx014.	Kim SY	J Anal Toxicol	2017	2017-02-16			10.1093/jat/bkx014
28202406	Cannabis cultivation: Methodological issues for obtaining medical-grade product	Chandra S, Lata H, ElSohly MA, Walker LA, Potter D.	Epilepsy Behav. 2017 May;70(Pt B):302-312. doi: 10.1016/j.yebeh.2016.11.029. Epub 2017 Feb 13.	Chandra S	Epilepsy Behav	2017	2017-02-17			10.1016/j.yebeh.2016.11.029
28207408	Evaluation of cannabinoids concentration and stability in standardized preparations of cannabis tea and cannabis oil by ultra-high performance liquid chromatography tandem mass spectrometry	Pacifici R, Marchei E, Salvatore F, Guandalini L, Busardò FP, Pichini S.	Clin Chem Lab Med. 2017 Aug 28;55(10):1555-1563. doi: 10.1515/cclm-2016-1060.	Pacifici R	Clin Chem Lab Med	2017	2017-02-17			10.1515/cclm-2016-1060
28210835	A 10-year review of cannabis exposure in children under 3-years of age: do we need a more global approach?	Claudet I, Le Breton M, Bréhin C, Franchitto N.	Eur J Pediatr. 2017 Apr;176(4):553-556. doi: 10.1007/s00431-017-2872-5. Epub 2017 Feb 16.	Claudet I	Eur J Pediatr	2017	2017-02-18			10.1007/s00431-017-2872-5
28212939	Cannabis exacerbates depressive symptoms in rat model induced by reserpine	Khadrawy YA, Sawie HG, Abdel-Salam OME, Hosny EN.	Behav Brain Res. 2017 May 1;324:41-50. doi: 10.1016/j.bbr.2017.02.015. Epub 2017 Feb 14.	Khadrawy YA	Behav Brain Res	2017	2017-02-19			10.1016/j.bbr.2017.02.015
28219717	Effects of tetrahydrocannabinol on glucose uptake in the rat brain	Miederer I, Uebbing K, Röhrich J, Maus S, Bausbacher N, Krauter K, Weyer-Elberich V, Lutz B, Schreckenberger M, Urban R.	Neuropharmacology. 2017 May 1;117:273-281. doi: 10.1016/j.neuropharm.2017.02.011. Epub 2017 Feb 20.	Miederer I	Neuropharmacology	2017	2017-02-22			10.1016/j.neuropharm.2017.02.011
28220044	Pregnenolone blocks cannabinoid-induced acute psychotic-like states in mice	Busquets-Garcia A, Soria-Gómez E, Redon B, Mackenbach Y, Vallée M, Chaouloff F, Varilh M, Ferreira G, Piazza PV, Marsicano G.	Mol Psychiatry. 2017 Nov;22(11):1594-1603. doi: 10.1038/mp.2017.4. Epub 2017 Feb 21.	Busquets-Garcia A	Mol Psychiatry	2017	2017-02-22	PMC5447368	EMS70886	10.1038/mp.2017.4
28232194	Effects of pyrene exposure on immune response and oxidative stress in the pearl oyster, Pinctada martensii	Xie J, Zhao C, Han Q, Zhou H, Li Q, Diao X.	Fish Shellfish Immunol. 2017 Apr;63:237-244. doi: 10.1016/j.fsi.2017.02.032. Epub 2017 Feb 20.	Xie J	Fish Shellfish Immunol	2017	2017-02-25			10.1016/j.fsi.2017.02.032
28236190	Protective Role of Tetrahydrocurcumin: an Active Polyphenolic Curcuminoid on Cadmium-InducedOxidative Damage in Rats	Ramakrishnan R, Elangovan P, Pari L.	Appl Biochem Biotechnol. 2017 Sep;183(1):51-69. doi: 10.1007/s12010-017-2430-7. Epub 2017 Feb 24.	Ramakrishnan R	Appl Biochem Biotechnol	2017	2017-02-26			10.1007/s12010-017-2430-7
28237318	Strokes are possible complications of cannabinoids use	Wolff V, Jouanjus E.	Epilepsy Behav. 2017 May;70(Pt B):355-363. doi: 10.1016/j.yebeh.2017.01.031. Epub 2017 Feb 23.	Wolff V	Epilepsy Behav	2017	2017-02-27			10.1016/j.yebeh.2017.01.031
28240187	The Endocannabinoid System Modulating Levels of Consciousness, Emotions and Likely Dream Contents	Murillo-Rodriguez E, Pastrana-Trejo JC, Salas-Crisóstomo M, de-la-Cruz M.	CNS Neurol Disord Drug Targets. 2017;16(4):370-379. doi: 10.2174/1871527316666170223161908.	Murillo-Rodriguez E	CNS Neurol Disord Drug Targets	2017	2017-02-28			10.2174/1871527316666170223161908
28240291	Residual Effects of THC via Novel Measures of Brain Perfusion and Metabolism in a Large Group of Chronic Cannabis Users	Filbey FM, Aslan S, Lu H, Peng SL.	Neuropsychopharmacology. 2018 Mar;43(4):700-707. doi: 10.1038/npp.2017.44. Epub 2017 Feb 27.	Filbey FM	Neuropsychopharmacology	2018	2017-02-28	PMC5809805		10.1038/npp.2017.44
28240418	Analysis of drugs of abuse in Cerumen - correlation of postmortem analysis results with those for blood, urine and hair	Meier SI, Koelzer SC, Schubert-Zsilavecz M, Toennes SW.	Drug Test Anal. 2017 Oct;9(10):1572-1585. doi: 10.1002/dta.2177. Epub 2017 Apr 12.	Meier SI	Drug Test Anal	2017	2017-02-28			10.1002/dta.2177
28254350	The current status of artisanal cannabis for the treatment of epilepsy in the United States	Sulak D, Saneto R, Goldstein B.	Epilepsy Behav. 2017 May;70(Pt B):328-333. doi: 10.1016/j.yebeh.2016.12.032. Epub 2017 Feb 21.	Sulak D	Epilepsy Behav	2017	2017-03-04			10.1016/j.yebeh.2016.12.032
28254499	Benzo[a]pyrene exposure under future ocean acidification scenarios weakens the immune responses of blood clam, Tegillarca granosa	Su W, Zha S, Wang Y, Shi W, Xiao G, Chai X, Wu H, Liu G.	Fish Shellfish Immunol. 2017 Apr;63:465-470. doi: 10.1016/j.fsi.2017.02.046. Epub 2017 Feb 28.	Su W	Fish Shellfish Immunol	2017	2017-03-04			10.1016/j.fsi.2017.02.046
28259650	Can we make cannabis safer?	Englund A, Freeman TP, Murray RM, McGuire P.	Lancet Psychiatry. 2017 Aug;4(8):643-648. doi: 10.1016/S2215-0366(17)30075-5. Epub 2017 Mar 2.	Englund A	Lancet Psychiatry	2017	2017-03-06			10.1016/S2215-0366(17)30075-5
28272498	The Differential Binding of Antipsychotic Drugs to the ABC Transporter P-Glycoprotein Predicts Cannabinoid-Antipsychotic Drug Interactions	Brzozowska NI, de Tonnerre EJ, Li KM, Wang XS, Boucher AA, Callaghan PD, Kuligowski M, Wong A, Arnold JC.	Neuropsychopharmacology. 2017 Oct;42(11):2222-2231. doi: 10.1038/npp.2017.50. Epub 2017 Mar 8.	Brzozowska NI	Neuropsychopharmacology	2017	2017-03-09	PMC5603813		10.1038/npp.2017.50
28273545	Prevalence of drugs in oral fluid from truck drivers in Brazilian highways	Bombana HS, Gjerde H, Dos Santos MF, Jamt REG, Yonamine M, Rohlfs WJC, Muñoz DR, Leyton V.	Forensic Sci Int. 2017 Apr;273:140-143. doi: 10.1016/j.forsciint.2017.02.023. Epub 2017 Mar 1.	Bombana HS	Forensic Sci Int	2017	2017-03-09			10.1016/j.forsciint.2017.02.023
28281107	Cannabis for Pain and Headaches: Primer	Kim PS, Fishman MA.	Curr Pain Headache Rep. 2017 Apr;21(4):19. doi: 10.1007/s11916-017-0619-7.	Kim PS	Curr Pain Headache Rep	2017	2017-03-11			10.1007/s11916-017-0619-7
28288911	Effects of traditional medical herbs "minor bupleurum decoction" on the non-specific immune responses of white shrimp (Litopenaeus vannamei)	Wu YS, Lee MC, Huang CT, Kung TC, Huang CY, Nan FH.	Fish Shellfish Immunol. 2017 May;64:218-225. doi: 10.1016/j.fsi.2017.03.018. Epub 2017 Mar 10.	Wu YS	Fish Shellfish Immunol	2017	2017-03-15			10.1016/j.fsi.2017.03.018
28289139	Longitudinal Predictors of Synthetic Cannabinoid Use in Adolescents	Ninnemann AL, Jeong Choi H, Stuart GL, Temple JR.	Pediatrics. 2017 Apr;139(4):e20163009. doi: 10.1542/peds.2016-3009. Epub 2017 Mar 13.	Ninnemann AL	Pediatrics	2017	2017-03-15			10.1542/peds.2016-3009
28298559	The Risk of Deep Venous Thrombosis and Pulmonary Embolism in Primary Sjögren Syndrome: A General Population-based Study	Aviña-Zubieta JA, Jansz M, Sayre EC, Choi HK.	J Rheumatol. 2017 Aug;44(8):1184-1189. doi: 10.3899/jrheum.160185. Epub 2017 Mar 15.	Aviña-Zubieta JA	J Rheumatol	2017	2017-03-17	PMC5587200	CAMS6821	10.3899/jrheum.160185
28300462	An update on the advancements in the treatment of agitation in Alzheimer's disease	Porsteinsson AP, Antonsdottir IM.	Expert Opin Pharmacother. 2017 Apr;18(6):611-620. doi: 10.1080/14656566.2017.1307340. Epub 2017 Mar 28.	Porsteinsson AP	Expert Opin Pharmacother	2017	2017-03-17			10.1080/14656566.2017.1307340
28315148	A case of cardiac tamponade due to an isolated abscess in the ascending aorta of a pregnant woman with a history of intravenous substance abuse	Shattuck B, Livingstone J.	Forensic Sci Med Pathol. 2017 Jun;13(2):226-229. doi: 10.1007/s12024-017-9856-7. Epub 2017 Mar 17.	Shattuck B	Forensic Sci Med Pathol	2017	2017-03-19			10.1007/s12024-017-9856-7
28317711	Analysis of cannabinoids by liquid chromatography-mass spectrometry in milk, liver and hemp seed to ensure food safety	Escrivá Ú, Andrés-Costa MJ, Andreu V, Picó Y.	Food Chem. 2017 Aug 1;228:177-185. doi: 10.1016/j.foodchem.2017.01.128. Epub 2017 Jan 28.	Escrivá Ú	Food Chem	2017	2017-03-21			10.1016/j.foodchem.2017.01.128
28323498	Predictors of Adult E-Cigarette Users Vaporizing Cannabis Using E-Cigarettes and Vape-Pens	Morean ME, Lipshie N, Josephson M, Foster D.	Subst Use Misuse. 2017 Jul 3;52(8):974-981. doi: 10.1080/10826084.2016.1268162. Epub 2017 Mar 21.	Morean ME	Subst Use Misuse	2017	2017-03-22	PMC5409866	NIHMS848253	10.1080/10826084.2016.1268162
28324168	The effect of eccentric exercise with blood flow restriction on neuromuscular activation, microvascular oxygenation, and the repeated bout effect	Lauver JD, Cayot TE, Rotarius T, Scheuermann BW.	Eur J Appl Physiol. 2017 May;117(5):1005-1015. doi: 10.1007/s00421-017-3589-x. Epub 2017 Mar 21.	Lauver JD	Eur J Appl Physiol	2017	2017-03-22			10.1007/s00421-017-3589-x
28326966	Cognitive load during route selection increases reliance on spatial heuristics	Brunyé TT, Martis SB, Taylor HA.	Q J Exp Psychol (Hove). 2018 May;71(5):1045-1056. doi: 10.1080/17470218.2017.1310268. Epub 2018 Jan 1.	Brunyé TT	Q J Exp Psychol (Hove)	2018	2017-03-23			10.1080/17470218.2017.1310268
28327548	Opioid-Sparing Effect of Cannabinoids: A Systematic Review and Meta-Analysis	Nielsen S, Sabioni P, Trigo JM, Ware MA, Betz-Stablein BD, Murnion B, Lintzeris N, Khor KE, Farrell M, Smith A, Le Foll B.	Neuropsychopharmacology. 2017 Aug;42(9):1752-1765. doi: 10.1038/npp.2017.51. Epub 2017 Mar 22.	Nielsen S	Neuropsychopharmacology	2017	2017-03-23	PMC5520783		10.1038/npp.2017.51
28333097	Effects of a Sativex-Like Combination of Phytocannabinoids on Disease Progression in R6/2 Mice, an Experimental Model of Huntington's Disease	Valdeolivas S, Sagredo O, Delgado M, Pozo MA, Fernández-Ruiz J.	Int J Mol Sci. 2017 Mar 23;18(4):684. doi: 10.3390/ijms18040684.	Valdeolivas S	Int J Mol Sci	2017	2017-03-24	PMC5412270		10.3390/ijms18040684
28343385	Development of a Rapid LC-MS/MS Method for the Quantification of Cannabidiol, Cannabidivarin, Δ(9)-Tetrahydrocannabivarin, and Cannabigerol in Mouse Peripheral Tissues	Piscitelli F, Pagano E, Lauritano A, Izzo AA, Di Marzo V.	Anal Chem. 2017 Apr 18;89(8):4749-4755. doi: 10.1021/acs.analchem.7b01094. Epub 2017 Apr 3.	Piscitelli F	Anal Chem	2017	2017-03-28			10.1021/acs.analchem.7b01094
28357892	Suspected Synthetic Cannabinomimetic Intoxication: Case Series and Review	Baum RA, Bailey A, Chan R, Blumenschein K.	J Pharm Pract. 2018 Apr;31(2):238-243. doi: 10.1177/0897190017699761. Epub 2017 Mar 30.	Baum RA	J Pharm Pract	2018	2017-03-31			10.1177/0897190017699761
28365173	Marijuana advertising exposure among current marijuana users in the U.S	Krauss MJ, Sowles SJ, Sehi A, Spitznagel EL, Berg CJ, Bierut LJ, Cavazos-Rehg PA.	Drug Alcohol Depend. 2017 May 1;174:192-200. doi: 10.1016/j.drugalcdep.2017.01.017. Epub 2017 Mar 29.	Krauss MJ	Drug Alcohol Depend	2017	2017-04-03	PMC5436304	NIHMS858465	10.1016/j.drugalcdep.2017.01.017
28365515	Pharmacokinetic properties of the synthetic cannabinoid JWH-018 and of its metabolites in serum after inhalation	Toennes SW, Geraths A, Pogoda W, Paulke A, Wunder C, Theunissen EL, Ramaekers JG.	J Pharm Biomed Anal. 2017 Jun 5;140:215-222. doi: 10.1016/j.jpba.2017.03.043. Epub 2017 Mar 24.	Toennes SW	J Pharm Biomed Anal	2017	2017-04-03			10.1016/j.jpba.2017.03.043
28371432	Determination of cannabinoid and synthetic cannabinoid metabolites in wastewater by liquid-liquid extraction and ultra-high performance supercritical fluid chromatography-tandem mass spectrometry	González-Mariño I, Thomas KV, Reid MJ.	Drug Test Anal. 2018 Jan;10(1):222-228. doi: 10.1002/dta.2199. Epub 2017 May 12.	González-Mariño I	Drug Test Anal	2018	2017-04-04			10.1002/dta.2199
28372838	Development and validation of a liquid chromatography tandem mass spectrometry method for the determination of cannabinoids and phase I and II metabolites in meconium	Prego-Meleiro P, Lendoiro E, Concheiro M, Cruz A, López-Rivadulla M, de Castro A.	J Chromatogr A. 2017 May 12;1497:118-126. doi: 10.1016/j.chroma.2017.03.066. Epub 2017 Mar 25.	Prego-Meleiro P	J Chromatogr A	2017	2017-04-05			10.1016/j.chroma.2017.03.066
28373077	New vistas on cannabis use disorder	Melis M, Frau R, Kalivas PW, Spencer S, Chioma V, Zamberletti E, Rubino T, Parolaro D.	Neuropharmacology. 2017 Sep 15;124:62-72. doi: 10.1016/j.neuropharm.2017.03.033. Epub 2017 Mar 31.	Melis M	Neuropharmacology	2017	2017-04-05	PMC5865400	NIHMS937369	10.1016/j.neuropharm.2017.03.033
28377200	Molecular cloning, characterization and function of a germinal center kinase MST4 gene from Litopenaeus vannamei in response to Vibrio alginolyticus challenge in TLR-TRAF6 signaling pathway	Zhao CS, Huang D, Peng T, Huang MZ, Xie CY, Chen J, Kong JR, Xie RC, Liu Y, Wang WN.	Dev Comp Immunol. 2017 Aug;73:206-219. doi: 10.1016/j.dci.2017.03.026. Epub 2017 Apr 6.	Zhao CS	Dev Comp Immunol	2017	2017-04-06			10.1016/j.dci.2017.03.026
28377876	Cannabinoid type 1 receptor-containing axons innervate NPY/AgRP neurons in the mouse arcuate nucleus	Morozov YM, Koch M, Rakic P, Horvath TL.	Mol Metab. 2017 Jan 27;6(4):374-381. doi: 10.1016/j.molmet.2017.01.004. eCollection 2017 Apr.	Morozov YM	Mol Metab	2017	2017-04-06	PMC5369208		10.1016/j.molmet.2017.01.004
28383571	Pressure-induced structural transformations and polymerization in ThC(2)	Guo Y, Yu C, Lin J, Wang C, Ren C, Sun B, Huai P, Xie R, Ke X, Zhu Z, Xu H.	Sci Rep. 2017 Apr 6;7:45872. doi: 10.1038/srep45872.	Guo Y	Sci Rep	2017	2017-04-07	PMC5382917		10.1038/srep45872
28386319	Tetrahydrocurcumin reduces oxidative stress-induced apoptosis via the mitochondrial apoptotic pathway by modulating autophagy in rats after traumatic brain injury	Gao Y, Zhuang Z, Gao S, Li X, Zhang Z, Ye Z, Li L, Tang C, Zhou M, Han X, Li J.	Am J Transl Res. 2017 Mar 15;9(3):887-899. eCollection 2017.	Gao Y	Am J Transl Res	2017	2017-04-08	PMC5375984
28392338	Cannabis: Exercise performance and sport. A systematic review	Kennedy MC.	J Sci Med Sport. 2017 Sep;20(9):825-829. doi: 10.1016/j.jsams.2017.03.012. Epub 2017 Mar 21.	Kennedy MC	J Sci Med Sport	2017	2017-04-11			10.1016/j.jsams.2017.03.012
28395309	Bivariate Left-Censored Bayesian Model for Predicting Exposure: Preliminary Analysis of Worker Exposure during the Deepwater Horizon Oil Spill	Groth C, Banerjee S, Ramachandran G, Stenzel MR, Sandler DP, Blair A, Engel LS, Kwok RK, Stewart PA.	Ann Work Expo Health. 2017 Jan 1;61(1):76-86. doi: 10.1093/annweh/wxw003.	Groth C	Ann Work Expo Health	2017	2017-04-11	PMC6363054		10.1093/annweh/wxw003
28399267	Development of a Δ9-Tetrahydrocannabinol Amino Acid-Dicarboxylate Prodrug With Improved Ocular Bioavailability	Adelli GR, Bhagav P, Taskar P, Hingorani T, Pettaway S, Gul W, ElSohly MA, Repka MA, Majumdar S.	Invest Ophthalmol Vis Sci. 2017 Apr 1;58(4):2167-2179. doi: 10.1167/iovs.16-20757.	Adelli GR	Invest Ophthalmol Vis Sci	2017	2017-04-12	PMC5389743		10.1167/iovs.16-20757
28399488	Intentional cannabis use to reduce crack cocaine use in a Canadian setting: A longitudinal analysis	Socías ME, Kerr T, Wood E, Dong H, Lake S, Hayashi K, DeBeck K, Jutras-Aswad D, Montaner J, Milloy MJ.	Addict Behav. 2017 Sep;72:138-143. doi: 10.1016/j.addbeh.2017.04.006. Epub 2017 Apr 4.	Socías ME	Addict Behav	2017	2017-04-12	PMC5500311	NIHMS867800	10.1016/j.addbeh.2017.04.006
28401285	Individual prolactin reactivity modulates response of nucleus accumbens to erotic stimuli during acute cannabis intoxication: an fMRI pilot study	Androvicova R, Horacek J, Tintera J, Hlinka J, Rydlo J, Jezova D, Balikova M, Hlozek T, Miksatkova P, Kuchar M, Roman M, Tomicek P, Tyls F, Viktorinova M, Palenicek T.	Psychopharmacology (Berl). 2017 Jul;234(13):1933-1943. doi: 10.1007/s00213-017-4601-1. Epub 2017 Apr 12.	Androvicova R	Psychopharmacology (Berl)	2017	2017-04-13			10.1007/s00213-017-4601-1
28402245	Thyroid Hormone Therapy for Older Adults with Subclinical Hypothyroidism	Stott DJ, Rodondi N, Kearney PM, Ford I, Westendorp RGJ, Mooijaart SP, Sattar N, Aubert CE, Aujesky D, Bauer DC, Baumgartner C, Blum MR, Browne JP, Byrne S, Collet TH, Dekkers OM, den Elzen WPJ, Du Puy RS, Ellis G, Feller M, Floriani C, Hendry K, Hurley C, Jukema JW, Kean S, Kelly M, Krebs D, Langhorne P, McCarthy G, McCarthy V, McConnachie A, McDade M, Messow M, O'Flynn A, O'Riordan D, Poortvlie…	N Engl J Med. 2017 Jun 29;376(26):2534-2544. doi: 10.1056/NEJMoa1603825. Epub 2017 Apr 3.	Stott DJ	N Engl J Med	2017	2017-04-13			10.1056/NEJMoa1603825
28402427	BDNF overexpression prevents cognitive deficit elicited by adolescent cannabis exposure and host susceptibility interaction	Segal-Gavish H, Gazit N, Barhum Y, Ben-Zur T, Taler M, Hornfeld SH, Gil-Ad I, Weizman A, Slutsky I, Niwa M, Kamiya A, Sawa A, Offen D, Barzilay R.	Hum Mol Genet. 2017 Jul 1;26(13):2462-2471. doi: 10.1093/hmg/ddx139.	Segal-Gavish H	Hum Mol Genet	2017	2017-04-13	PMC6251614		10.1093/hmg/ddx139
28407543	Subjective and physiological effects, and expired carbon monoxide concentrations in frequent and occasional cannabis smokers following smoked, vaporized, and oral cannabis administration	Newmeyer MN, Swortwood MJ, Abulseoud OA, Huestis MA.	Drug Alcohol Depend. 2017 Jun 1;175:67-76. doi: 10.1016/j.drugalcdep.2017.02.003. Epub 2017 Mar 29.	Newmeyer MN	Drug Alcohol Depend	2017	2017-04-14			10.1016/j.drugalcdep.2017.02.003
28412574	Work place drug testing of police officers after THC exposure during large volume cannabis seizures	Doran GS, Deans R, De Filippis C, Kostakis C, Howitt JA.	Forensic Sci Int. 2017 Jun;275:224-233. doi: 10.1016/j.forsciint.2017.03.023. Epub 2017 Apr 2.	Doran GS	Forensic Sci Int	2017	2017-04-17			10.1016/j.forsciint.2017.03.023
28412916	Cannabis; Epidemiological, Neurobiological and Psychopathological Issues: An Update	De Luca MA, Di Chiara G, Cadoni C, Lecca D, Orsolini L, Papanti D, Corkery J, Schifano F.	CNS Neurol Disord Drug Targets. 2017;16(5):598-609. doi: 10.2174/1871527316666170413113246.	De Luca MA	CNS Neurol Disord Drug Targets	2017	2017-04-18			10.2174/1871527316666170413113246
28412919	Neurological Disorders in Medical Use of Cannabis: An Update	Solimini R, Rotolo MC, Pichini S, Pacifici R.	CNS Neurol Disord Drug Targets. 2017;16(5):527-533. doi: 10.2174/1871527316666170413105421.	Solimini R	CNS Neurol Disord Drug Targets	2017	2017-04-18			10.2174/1871527316666170413105421
28414664	Gonococcal Endocarditis: The Gift That Stops Giving! An Uncommon Presentation of a Common Disease	Olayemi G, Oferczak M, Elagizi A, El-Abbassi I, Eschete M, Crowe J.	J La State Med Soc. 2017 Mar-Apr;169(2):47. Epub 2017 Apr 15.	Olayemi G	J La State Med Soc	2017	2017-04-18
28416863	Protective effects of tetrahydrocurcumin (THC) on fibroblast and melanoma cell lines in vitro: it's implication for wound healing	Trivedi MK, Gangwar M, Mondal SC, Jana S.	J Food Sci Technol. 2017 Apr;54(5):1137-1145. doi: 10.1007/s13197-017-2525-8. Epub 2017 Feb 27.	Trivedi MK	J Food Sci Technol	2017	2017-04-19	PMC5380618		10.1007/s13197-017-2525-8
28419252	Sensitive Determination of Cannabinoids in Whole Blood by LC-MS-MS After Rapid Removal of Phospholipids by Filtration	Sørensen LK, Hasselstrøm JB.	J Anal Toxicol. 2017 Jun 1;41(5):382-391. doi: 10.1093/jat/bkx030.	Sørensen LK	J Anal Toxicol	2017	2017-04-19			10.1093/jat/bkx030
28422145	Compromised External Validity: Federally Produced Cannabis Does Not Reflect Legal Markets	Vergara D, Bidwell LC, Gaudino R, Torres A, Du G, Ruthenburg TC, deCesare K, Land DP, Hutchison KE, Kane NC.	Sci Rep. 2017 Apr 19;7:46528. doi: 10.1038/srep46528.	Vergara D	Sci Rep	2017	2017-04-20	PMC5395929		10.1038/srep46528
28425102	Fatal Overdose of Gamma-hydroxybutyrate Acid After Ingestion of 1,4-Butanediol	Le Garff E, Mesli V, Cornez R, Demarly C, Tournel G, Hédouin V.	J Forensic Sci. 2018 Jan;63(1):326-329. doi: 10.1111/1556-4029.13510. Epub 2017 Apr 20.	Le Garff E	J Forensic Sci	2018	2017-04-21			10.1111/1556-4029.13510
28426670	Mice expressing a "hyper-sensitive" form of the CB1 cannabinoid receptor (CB1) show modestly enhanced alcohol preference and consumption	Marcus DJ, Henderson-Redmond AN, Gonek M, Zee ML, Farnsworth JC, Amin RA, Andrews MJ, Davis BJ, Mackie K, Morgan DJ.	PLoS One. 2017 Apr 20;12(4):e0174826. doi: 10.1371/journal.pone.0174826. eCollection 2017.	Marcus DJ	PLoS One	2017	2017-04-21	PMC5398885		10.1371/journal.pone.0174826
28438101	Intravenous administration of cannabis and lethal anaphylaxis	Gilbert JD, Grabowski M, Byard RW.	Med Sci Law. 2017 Apr;57(2):91-94. doi: 10.1177/0025802417699343. Epub 2017 Mar 12.	Gilbert JD	Med Sci Law	2017	2017-04-26			10.1177/0025802417699343
28442116	Determination of delta-9-tetrahydrocannabinol content of cannabis seizures in Egypt	Souleman AMA, Gaafar AEM, Abdel-Salam OM, ElShebiney SA.	Asian Pac J Trop Med. 2017 Mar;10(3):311-314. doi: 10.1016/j.apjtm.2017.03.011. Epub 2017 Mar 6.	Souleman AMA	Asian Pac J Trop Med	2017	2017-04-27			10.1016/j.apjtm.2017.03.011
28442584	Apparent CB(1) Receptor Rimonabant Affinity Estimates: Combination with THC and Synthetic Cannabinoids in the Mouse In Vivo Triad Model	Grim TW, Morales AJ, Thomas BF, Wiley JL, Endres GW, Negus SS, Lichtman AH.	J Pharmacol Exp Ther. 2017 Jul;362(1):210-218. doi: 10.1124/jpet.117.240192. Epub 2017 Apr 25.	Grim TW	J Pharmacol Exp Ther	2017	2017-04-27	PMC5478909		10.1124/jpet.117.240192
28443616	Effects of Extended Cannabis Abstinence on Cognitive Outcomes in Cannabis Dependent Patients with Schizophrenia vs Non-Psychiatric Controls	Rabin RA, Barr MS, Goodman MS, Herman Y, Zakzanis KK, Kish SJ, Kiang M, Remington G, George TP.	Neuropsychopharmacology. 2017 Oct;42(11):2259-2271. doi: 10.1038/npp.2017.85. Epub 2017 Apr 26.	Rabin RA	Neuropsychopharmacology	2017	2017-04-27	PMC5603819		10.1038/npp.2017.85
28445405	Significant Tic Reduction in An Otherwise Treatment-Resistant Patient with Gilles de la Tourette Syndrome Following Treatment with Nabiximols	Kanaan AS, Jakubovski E, Müller-Vahl K.	Brain Sci. 2017 Apr 26;7(5):47. doi: 10.3390/brainsci7050047.	Kanaan AS	Brain Sci	2017	2017-04-27	PMC5447929		10.3390/brainsci7050047
28448164	Increasing use of cannabis among arrested drivers in Norway	Valen A, Bogstrand ST, Vindenes V, Gjerde H.	Traffic Inj Prev. 2017 Nov 17;18(8):801-806. doi: 10.1080/15389588.2017.1321114. Epub 2017 Apr 27.	Valen A	Traffic Inj Prev	2017	2017-04-28			10.1080/15389588.2017.1321114
28449191	Perceived harms and benefits of tobacco, marijuana, and electronic vaporizers among young adults in Colorado: implications for health education and research	Popova L, McDonald EA, Sidhu S, Barry R, Richers Maruyama TA, Sheon NM, Ling PM.	Addiction. 2017 Oct;112(10):1821-1829. doi: 10.1111/add.13854. Epub 2017 May 26.	Popova L	Addiction	2017	2017-04-28	PMC5593776	NIHMS872154	10.1111/add.13854
28452604	Effects of dexmedetomidine on renal tissue after lower limb ischemia reperfusion injury in streptozotocin induced diabetic rats	Erbatur ME, Sezen ŞC, Bayraktar AC, Arslan M, Kavutçu M, Aydın ME.	Libyan J Med. 2017 Dec;12(1):1270021. doi: 10.1080/19932820.2017.1270021.	Erbatur ME	Libyan J Med	2017	2017-04-29	PMC5328322		10.1080/19932820.2017.1270021
28452845	Dronabinol-Induced Acute Altered Mental Status in an Elderly Patient	Sinha A, Singh P, Kupfer Y.	Am J Ther. 2018 Jul/Aug;25(4):e502-e503. doi: 10.1097/MJT.0000000000000593.	Sinha A	Am J Ther	2018	2017-04-29			10.1097/MJT.0000000000000593
28455844	Open Probe fast GC-MS - combining ambient sampling ultra-fast separation and in-vacuum ionization for real-time analysis	Keshet U, Alon T, Fialkov AB, Amirav A.	J Mass Spectrom. 2017 Jul;52(7):417-426. doi: 10.1002/jms.3941.	Keshet U	J Mass Spectrom	2017	2017-04-30			10.1002/jms.3941
28456476	The acute effect of cannabis on plasma, liver and brain ammonia dynamics, a translational study	Abulseoud OA, Zuccoli ML, Zhang L, Barnes A, Huestis MA, Lin DT.	Eur Neuropsychopharmacol. 2017 Jul;27(7):679-690. doi: 10.1016/j.euroneuro.2017.03.006. Epub 2017 Apr 26.	Abulseoud OA	Eur Neuropsychopharmacol	2017	2017-05-01	PMC6091863	NIHMS983223	10.1016/j.euroneuro.2017.03.006
28456895	Cannabis Use, Medication Management and Adherence Among Persons Living with HIV	Vidot DC, Lerner B, Gonzalez R.	AIDS Behav. 2017 Jul;21(7):2005-2013. doi: 10.1007/s10461-017-1782-x.	Vidot DC	AIDS Behav	2017	2017-05-01	PMC5503453	NIHMS872498	10.1007/s10461-017-1782-x
28460298	Laboratory persistence in soil of thiacloprid, pendimethalin and fenarimol incubated with treated wastewater and dissolved organic matter solutions. Contribution of soil biota	Rodríguez-Liébana JA, ElGouzi S, Peña A.	Chemosphere. 2017 Aug;181:508-517. doi: 10.1016/j.chemosphere.2017.04.111. Epub 2017 Apr 26.	Rodríguez-Liébana JA	Chemosphere	2017	2017-05-02			10.1016/j.chemosphere.2017.04.111
28463706	THC and CBD in blood samples and seizures in Norway: Does CBD affect THC-induced impairment in apprehended subjects?	Havig SM, Høiseth G, Strand MC, Karinen RA, Brochmann GW, Strand DH, Bachs L, Vindenes V.	Forensic Sci Int. 2017 Jul;276:12-17. doi: 10.1016/j.forsciint.2017.04.006. Epub 2017 Apr 15.	Havig SM	Forensic Sci Int	2017	2017-05-03			10.1016/j.forsciint.2017.04.006
28476279	Medical cannabis use among patients with chronic pain in an interdisciplinary pain rehabilitation program: Characterization and treatment outcomes	Shah A, Craner J, Cunningham JL.	J Subst Abuse Treat. 2017 Jun;77:95-100. doi: 10.1016/j.jsat.2017.03.012. Epub 2017 Apr 6.	Shah A	J Subst Abuse Treat	2017	2017-05-07			10.1016/j.jsat.2017.03.012
28477553	The use of a 0.20 μm particulate matter filter decreases cytotoxicity in lung epithelial cells following air-liquid interface exposure to motorcycle exhaust	Yu T, Zhang X, Zhong L, Cui Q, Hu X, Li B, Wang Z, Dai Y, Zheng Y, Bin P.	Environ Pollut. 2017 Aug;227:287-295. doi: 10.1016/j.envpol.2017.04.080. Epub 2017 May 4.	Yu T	Environ Pollut	2017	2017-05-07			10.1016/j.envpol.2017.04.080
28481360	A chronic low dose of Δ(9)-tetrahydrocannabinol (THC) restores cognitive function in old mice	Bilkei-Gorzo A, Albayram O, Draffehn A, Michel K, Piyanova A, Oppenheimer H, Dvir-Ginzberg M, Rácz I, Ulas T, Imbeault S, Bab I, Schultze JL, Zimmer A.	Nat Med. 2017 Jun;23(6):782-787. doi: 10.1038/nm.4311. Epub 2017 May 8.	Bilkei-Gorzo A	Nat Med	2017	2017-05-09			10.1038/nm.4311
28484058	Uncertainty in Teaching Health Center (THC) Funding: Still Crazy After All These Years	Gravel JW Jr.	J Am Board Fam Med. 2017 May-Jun;30(3):275-278. doi: 10.3122/jabfm.2017.03.170133.	Gravel JW Jr	J Am Board Fam Med	2017	2017-05-10			10.3122/jabfm.2017.03.170133
28487656	Adolescent Female Cannabinoid Exposure Diminishes the Reward-Facilitating Effects of Δ(9)-Tetrahydrocannabinol and d-Amphetamine in the Adult Male Offspring	Pitsilis G, Spyridakos D, Nomikos GG, Panagis G.	Front Pharmacol. 2017 Apr 25;8:225. doi: 10.3389/fphar.2017.00225. eCollection 2017.	Pitsilis G	Front Pharmacol	2017	2017-05-11	PMC5404657		10.3389/fphar.2017.00225
28492950	Psychoactive constituents of cannabis and their clinical implications: a systematic review	Casajuana Köguel C, López-Pelayo H, Balcells-Olivero MM, Colom J, Gual A.	Adicciones. 2018 Apr 15;30(2):140-151. doi: 10.20882/adicciones.858.	Casajuana Köguel C	Adicciones	2018	2017-05-12			10.20882/adicciones.858
28496398	Growth of Thalamocortical Fibers to the Somatosensory Cortex in the Human Fetal Brain	Krsnik Ž, Majić V, Vasung L, Huang H, Kostović I.	Front Neurosci. 2017 Apr 27;11:233. doi: 10.3389/fnins.2017.00233. eCollection 2017.	Krsnik Ž	Front Neurosci	2017	2017-05-13	PMC5406414		10.3389/fnins.2017.00233
28501518	Cannabidiol in medical marijuana: Research vistas and potential opportunities	Rong C, Lee Y, Carmona NE, Cha DS, Ragguett RM, Rosenblat JD, Mansur RB, Ho RC, McIntyre RS.	Pharmacol Res. 2017 Jul;121:213-218. doi: 10.1016/j.phrs.2017.05.005. Epub 2017 May 10.	Rong C	Pharmacol Res	2017	2017-05-15			10.1016/j.phrs.2017.05.005
28506704	A method to achieve extended cannabis abstinence in cannabis dependent patients with schizophrenia and non-psychiatric controls	Rabin RA, Kozak K, Zakzanis KK, Remington G, Stefan C, Budney AJ, George TP.	Schizophr Res. 2018 Apr;194:47-54. doi: 10.1016/j.schres.2017.05.006. Epub 2017 May 12.	Rabin RA	Schizophr Res	2018	2017-05-17			10.1016/j.schres.2017.05.006
28516445	Role of the endocannabinoid system in vertebrates: Emphasis on the zebrafish model	Oltrabella F, Melgoza A, Nguyen B, Guo S.	Dev Growth Differ. 2017 May;59(4):194-210. doi: 10.1111/dgd.12351. Epub 2017 May 17.	Oltrabella F	Dev Growth Differ	2017	2017-05-19	PMC5636690	NIHMS864489	10.1111/dgd.12351
28516479	Gα(s) signalling of the CB(1) receptor and the influence of receptor number	Finlay DB, Cawston EE, Grimsey NL, Hunter MR, Korde A, Vemuri VK, Makriyannis A, Glass M.	Br J Pharmacol. 2017 Aug;174(15):2545-2562. doi: 10.1111/bph.13866. Epub 2017 Jun 19.	Finlay DB	Br J Pharmacol	2017	2017-05-19	PMC5513864		10.1111/bph.13866
28521146	Effect of continued cannabis use on medication adherence in the first two years following onset of psychosis	Schoeler T, Petros N, Di Forti M, Klamerus E, Foglia E, Murray R, Bhattacharyya S.	Psychiatry Res. 2017 Sep;255:36-41. doi: 10.1016/j.psychres.2017.05.009. Epub 2017 May 10.	Schoeler T	Psychiatry Res	2017	2017-05-19			10.1016/j.psychres.2017.05.009
28522773	Severe neurological symptoms following synthetic cannabinoid intoxication	van Gorp F, Wejden LC, Stienstra NA, Kuck EM, Haas LEM.	Neth J Med. 2017 May;75(4):158-160.	van Gorp F	Neth J Med	2017	2017-05-20
28529018	Effects of anandamide administration on components of reward processing during free choice	Zona LC, Fry BR, LaLonde JA, Cromwell HC.	Pharmacol Biochem Behav. 2017 Jul;158:14-21. doi: 10.1016/j.pbb.2017.05.008. Epub 2017 May 18.	Zona LC	Pharmacol Biochem Behav	2017	2017-05-23			10.1016/j.pbb.2017.05.008
28531767	The Standard Joint Unit	Casajuana Kögel C, Balcells-Olivero MM, López-Pelayo H, Miquel L, Teixidó L, Colom J, Nutt DJ, Rehm J, Gual A.	Drug Alcohol Depend. 2017 Jul 1;176:109-116. doi: 10.1016/j.drugalcdep.2017.03.010. Epub 2017 May 16.	Casajuana Kögel C	Drug Alcohol Depend	2017	2017-05-23			10.1016/j.drugalcdep.2017.03.010
28537982	Selective Cannabinoids for Chronic Neuropathic Pain: A Systematic Review and Meta-analysis	Meng H, Johnston B, Englesakis M, Moulin DE, Bhatia A.	Anesth Analg. 2017 Nov;125(5):1638-1652. doi: 10.1213/ANE.0000000000002110.	Meng H	Anesth Analg	2017	2017-05-25			10.1213/ANE.0000000000002110
28544560	Fatal intoxication by 5F-ADB and diphenidine: Detection, quantification, and investigation of their main metabolic pathways in humans by LC/MS/MS and LC/Q-TOFMS	Kusano M, Zaitsu K, Taki K, Hisatsune K, Nakajima J, Moriyasu T, Asano T, Hayashi Y, Tsuchihashi H, Ishii A.	Drug Test Anal. 2018 Feb;10(2):284-293. doi: 10.1002/dta.2215. Epub 2017 Jul 19.	Kusano M	Drug Test Anal	2018	2017-05-26			10.1002/dta.2215
28552942	Measuring cannabis consumption: Psychometric properties of the Daily Sessions, Frequency, Age of Onset, and Quantity of Cannabis Use Inventory (DFAQ-CU)	Cuttler C, Spradlin A.	PLoS One. 2017 May 26;12(5):e0178194. doi: 10.1371/journal.pone.0178194. eCollection 2017.	Cuttler C	PLoS One	2017	2017-05-30	PMC5446174		10.1371/journal.pone.0178194
28556310	Variation in cannabis potency and prices in a newly legal market: evidence from 30 million cannabis sales in Washington state	Smart R, Caulkins JP, Kilmer B, Davenport S, Midgette G.	Addiction. 2017 Dec;112(12):2167-2177. doi: 10.1111/add.13886. Epub 2017 Jul 4.	Smart R	Addiction	2017	2017-05-31	PMC5673542	NIHMS879761	10.1111/add.13886
28557062	Substance-related psychopathology and aggressiveness in a nightlife holiday resort: Results from a pilot study in a psychiatric inpatient unit in Ibiza	Martinotti G, Cinosi E, Santacroce R, Papanti D, Pasquini A, Mancini V, Corbo M, Fiori F, Sarchione F, Marchetti D, Verrocchio MC, Di Giannantonio M, Torrens M, Schifano F, Morlan Coarasa MJ, Merino Del Villar C.	Hum Psychopharmacol. 2017 May;32(3). doi: 10.1002/hup.2586. Epub 2017 May 30.	Martinotti G	Hum Psychopharmacol	2017	2017-05-31			10.1002/hup.2586
28560402	Anticancer effects of phytocannabinoids used with chemotherapy in leukaemia cells can be improved by altering the sequence of their administration	Scott KA, Dalgleish AG, Liu WM.	Int J Oncol. 2017 Jul;51(1):369-377. doi: 10.3892/ijo.2017.4022. Epub 2017 May 29.	Scott KA	Int J Oncol	2017	2017-06-01			10.3892/ijo.2017.4022
28560628	Fate of selected drugs in the wastewater treatment plants (WWTPs) for domestic sewage	Chiavola A, Tedesco P, Boni MR.	Environ Sci Pollut Res Int. 2019 Jan;26(2):1113-1123. doi: 10.1007/s11356-017-9313-x. Epub 2017 May 30.	Chiavola A	Environ Sci Pollut Res Int	2019	2017-06-01			10.1007/s11356-017-9313-x
28561272	Cannabinoid CB(1) /CB(2) receptor agonists attenuate hyperactivity and body weight loss in a rat model of activity-based anorexia	Scherma M, Satta V, Collu R, Boi MF, Usai P, Fratta W, Fadda P.	Br J Pharmacol. 2017 Aug;174(16):2682-2695. doi: 10.1111/bph.13892. Epub 2017 Jul 11.	Scherma M	Br J Pharmacol	2017	2017-06-01	PMC5522993		10.1111/bph.13892
28570781	The effect of antioxidants on the long-term stability of THC and related cannabinoids in sampled whole blood	Sørensen LK, Hasselstrøm JB.	Drug Test Anal. 2018 Feb;10(2):301-309. doi: 10.1002/dta.2221. Epub 2017 Jul 18.	Sørensen LK	Drug Test Anal	2018	2017-06-02			10.1002/dta.2221
28578174	Maternal marijuana use, adverse pregnancy outcomes, and neonatal morbidity	Metz TD, Allshouse AA, Hogue CJ, Goldenberg RL, Dudley DJ, Varner MW, Conway DL, Saade GR, Silver RM.	Am J Obstet Gynecol. 2017 Oct;217(4):478.e1-478.e8. doi: 10.1016/j.ajog.2017.05.050. Epub 2017 May 31.	Metz TD	Am J Obstet Gynecol	2017	2017-06-05	PMC5614818	NIHMS880792	10.1016/j.ajog.2017.05.050
28578322	Suppression of STAT3 Signaling by Δ9-Tetrahydrocannabinol (THC) Induces Trophoblast Dysfunction	Chang X, Bian Y, He Q, Yao J, Zhu J, Wu J, Wang K, Duan T.	Cell Physiol Biochem. 2017;42(2):537-550. doi: 10.1159/000477603. Epub 2017 Jun 5.	Chang X	Cell Physiol Biochem	2017	2017-06-05			10.1159/000477603
28578499	Thermal treatment of luteolin-7-O-β-glucoside improves its immunomodulatory and antioxidant potencies	Maatouk M, Mustapha N, Mokdad-Bzeouich I, Chaaban H, Abed B, Iaonnou I, Ghedira K, Ghoul M, Ghedira LC.	Cell Stress Chaperones. 2017 Nov;22(6):775-785. doi: 10.1007/s12192-017-0808-7. Epub 2017 Jun 4.	Maatouk M	Cell Stress Chaperones	2017	2017-06-05	PMC5655366		10.1007/s12192-017-0808-7
28579491	Recommendation to reconsider examining cannabis subtypes together due to opposing effects on brain, cognition and behavior	Rømer Thomsen K, Callesen MB, Feldstein Ewing SW.	Neurosci Biobehav Rev. 2017 Sep;80:156-158. doi: 10.1016/j.neubiorev.2017.05.025. Epub 2017 Jun 1.	Rømer Thomsen K	Neurosci Biobehav Rev	2017	2017-06-06	PMC6373765	NIHMS1009964	10.1016/j.neubiorev.2017.05.025
28580227	Does Cannabis Composition Matter? Differential Effects of Delta-9-tetrahydrocannabinol and Cannabidiol on Human Cognition	Colizzi M, Bhattacharyya S.	Curr Addict Rep. 2017;4(2):62-74. doi: 10.1007/s40429-017-0142-2. Epub 2017 Apr 29.	Colizzi M	Curr Addict Rep	2017	2017-06-06	PMC5435777		10.1007/s40429-017-0142-2
28580580	Illicit Drug Delivery Via Administration of Human Blood	Labay LM, Catanese CA.	J Forensic Sci. 2018 Mar;63(2):644-647. doi: 10.1111/1556-4029.13573. Epub 2017 Jun 5.	Labay LM	J Forensic Sci	2018	2017-06-06			10.1111/1556-4029.13573
28582498	Designing microorganisms for heterologous biosynthesis of cannabinoids	Carvalho Â, Hansen EH, Kayser O, Carlsen S, Stehle F.	FEMS Yeast Res. 2017 Jun 1;17(4):fox037. doi: 10.1093/femsyr/fox037.	Carvalho Â	FEMS Yeast Res	2017	2017-06-06	PMC5812543		10.1093/femsyr/fox037
28582737	Oxidative stress response in the seagrass Posidonia oceanica and the seaweed Dasycladus vermicularis associated to the invasive tropical green seaweed Halimeda incrassata	Sureda A, Tejada S, Capó X, Melià C, Ferriol P, Pinya S, Mateu-Vicens G.	Sci Total Environ. 2017 Dec 1;601-602:918-925. doi: 10.1016/j.scitotenv.2017.05.261. Epub 2017 Jun 3.	Sureda A	Sci Total Environ	2017	2017-06-06			10.1016/j.scitotenv.2017.05.261
28583800	Analysis of natural product regulation of cannabinoid receptors in the treatment of human disease	Badal S, Smith KN, Rajnarayanan R.	Pharmacol Ther. 2017 Dec;180:24-48. doi: 10.1016/j.pharmthera.2017.06.003. Epub 2017 Jun 3.	Badal S	Pharmacol Ther	2017	2017-06-07			10.1016/j.pharmthera.2017.06.003
28590798	Beyond Ketamine and Phencyclidine: Analytically Confirmed Use of Multiple Novel Arylcyclohexylamines	Thornton S, Lisbon D, Lin T, Gerona R.	J Psychoactive Drugs. 2017 Sep-Oct;49(4):289-293. doi: 10.1080/02791072.2017.1333660. Epub 2017 Jun 7.	Thornton S	J Psychoactive Drugs	2017	2017-06-08			10.1080/02791072.2017.1333660
28592614	Cannabinoid CB(2) Agonist GW405833 Suppresses Inflammatory and Neuropathic Pain through a CB(1) Mechanism that is Independent of CB(2) Receptors in Mice	Li AL, Carey LM, Mackie K, Hohmann AG.	J Pharmacol Exp Ther. 2017 Aug;362(2):296-305. doi: 10.1124/jpet.117.241901. Epub 2017 Jun 7.	Li AL	J Pharmacol Exp Ther	2017	2017-06-09	PMC5502377		10.1124/jpet.117.241901
28595684	Marijuana Use in the Elderly: Implications and Considerations	Mahvan TD, Hilaire ML, Mann A, Brown A, Linn B, Gardner T, Lai B.	Consult Pharm. 2017 Jun 1;32(6):341-351. doi: 10.4140/TCP.n.2017.341.	Mahvan TD	Consult Pharm	2017	2017-06-10			10.4140/TCP.n.2017.341
28596765	Enzymatic Degradation of Aromatic and Aliphatic Polyesters by P. pastoris Expressed Cutinase 1 from Thermobifida cellulosilytica	Gamerith C, Vastano M, Ghorbanpour SM, Zitzenbacher S, Ribitsch D, Zumstein MT, Sander M, Herrero Acero E, Pellis A, Guebitz GM.	Front Microbiol. 2017 May 24;8:938. doi: 10.3389/fmicb.2017.00938. eCollection 2017.	Gamerith C	Front Microbiol	2017	2017-06-10	PMC5443175		10.3389/fmicb.2017.00938
28599212	Dose-related effects of delta-9-THC on emotional responses to acute psychosocial stress	Childs E, Lutz JA, de Wit H.	Drug Alcohol Depend. 2017 Aug 1;177:136-144. doi: 10.1016/j.drugalcdep.2017.03.030. Epub 2017 May 30.	Childs E	Drug Alcohol Depend	2017	2017-06-10	PMC6349031	NIHMS936254	10.1016/j.drugalcdep.2017.03.030
28602505	Proposal of 5-methoxy-N-methyl-N-isopropyltryptamine consumption biomarkers through identification of in vivo metabolites from mice	Fabregat-Safont D, Barneo-Muñoz M, Martinez-Garcia F, Sancho JV, Hernández F, Ibáñez M.	J Chromatogr A. 2017 Jul 28;1508:95-105. doi: 10.1016/j.chroma.2017.06.010. Epub 2017 Jun 5.	Fabregat-Safont D	J Chromatogr A	2017	2017-06-13			10.1016/j.chroma.2017.06.010
28606862	Pathogenicity profile of Vibrio parahaemolyticus in farmed Pacific white shrimp, Penaeus vannamei	Ananda Raja R, Sridhar R, Balachandran C, Palanisammi A, Ramesh S, Nagarajan K.	Fish Shellfish Immunol. 2017 Aug;67:368-381. doi: 10.1016/j.fsi.2017.06.020. Epub 2017 Jun 9.	Ananda Raja R	Fish Shellfish Immunol	2017	2017-06-14			10.1016/j.fsi.2017.06.020
28613573	Marijuana Toxicity	Turner AR, Spurling BC, Agrawal S.	2023 Feb 12. In: StatPearls [Internet]. Treasure Island (FL): StatPearls Publishing; 2023 Jan–.	Turner ARSpurling BCAgrawal S	StatPearls	2023	2023-02-12
28613973	The association of cannabis use on inpatient psychiatric hospital outcomes	Rylander M, Winston HR, Medlin H, Hull M, Nussbaum A.	Am J Drug Alcohol Abuse. 2018;44(1):73-84. doi: 10.1080/00952990.2017.1329313. Epub 2017 Jun 14.	Rylander M	Am J Drug Alcohol Abuse	2018	2017-06-15			10.1080/00952990.2017.1329313
28624604	User characteristics and effect profile of Butane Hash Oil: An extremely high-potency cannabis concentrate	Chan GCK, Hall W, Freeman TP, Ferris J, Kelly AB, Winstock A.	Drug Alcohol Depend. 2017 Sep 1;178:32-38. doi: 10.1016/j.drugalcdep.2017.04.014. Epub 2017 Jun 8.	Chan GCK	Drug Alcohol Depend	2017	2017-06-19			10.1016/j.drugalcdep.2017.04.014
28631315	A Two-Year Study of Δ 9 Tetrahydrocannabinol Concentrations in Drivers; Part 2: Physiological Signs on Drug Recognition Expert (DRE) and non-DRE Examinations,	Declues K, Perez S, Figueroa A.	J Forensic Sci. 2018 Mar;63(2):583-587. doi: 10.1111/1556-4029.13550. Epub 2017 Jun 20.	Declues K	J Forensic Sci	2018	2017-06-21			10.1111/1556-4029.13550
28634109	Cannabis-associated psychosis: Neural substrate and clinical impact	Murray RM, Englund A, Abi-Dargham A, Lewis DA, Di Forti M, Davies C, Sherif M, McGuire P, D'Souza DC.	Neuropharmacology. 2017 Sep 15;124:89-104. doi: 10.1016/j.neuropharm.2017.06.018. Epub 2017 Jun 17.	Murray RM	Neuropharmacology	2017	2017-06-22			10.1016/j.neuropharm.2017.06.018
28637725	Filling the gaps in SARDs research: collection and linkage of administrative health data and self-reported survey data for a general population-based cohort of individuals with and without diagnoses of systemic autoimmune rheumatic disease (SARDs) from British Columbia, Canada	McCormick N, Reimer K, Famouri A, Marra CA, Aviña-Zubieta JA.	BMJ Open. 2017 Jun 21;7(6):e013977. doi: 10.1136/bmjopen-2016-013977.	McCormick N	BMJ Open	2017	2017-06-23	PMC5541381		10.1136/bmjopen-2016-013977
28640062	An Atmospheric Pressure Chemical Ionization MS/MS Assay Using Online Extraction for the Analysis of 11 Cannabinoids and Metabolites in Human Plasma and Urine	Klawitter J, Sempio C, Mörlein S, De Bloois E, Klepacki J, Henthorn T, Leehey MA, Hoffenberg EJ, Knupp K, Wang GS, Hopfer C, Kinney G, Bowler R, Foreman N, Galinkin J, Christians U, Klawitter J.	Ther Drug Monit. 2017 Oct;39(5):556-564. doi: 10.1097/FTD.0000000000000427.	Klawitter J	Ther Drug Monit	2017	2017-06-23	PMC5600652	NIHMS884547	10.1097/FTD.0000000000000427
28641128	Expectancy of impairment attenuates marijuana-induced risk taking	Gunn RL, Skalski L, Metrik J.	Drug Alcohol Depend. 2017 Sep 1;178:39-42. doi: 10.1016/j.drugalcdep.2017.04.027. Epub 2017 Jun 13.	Gunn RL	Drug Alcohol Depend	2017	2017-06-23	PMC5796549	NIHMS884492	10.1016/j.drugalcdep.2017.04.027
28641496	Guanfacine Attenuates Adverse Effects of Dronabinol (THC) on Working Memory in Adolescent-Onset Heavy Cannabis Users: A Pilot Study	Mathai DS, Holst M, Rodgman C, Haile CN, Keller J, Hussain MZ, Kosten TR, Newton TF, Verrico CD.	J Neuropsychiatry Clin Neurosci. 2018 Winter;30(1):66-76. doi: 10.1176/appi.neuropsych.16120328. Epub 2017 Jun 23.	Mathai DS	J Neuropsychiatry Clin Neurosci	2018	2017-06-24			10.1176/appi.neuropsych.16120328
28642081	Tetrahydrocannabinol (THC) impairs encoding but not retrieval of verbal information	Ranganathan M, Radhakrishnan R, Addy PH, Schnakenberg-Martin AM, Williams AH, Carbuto M, Elander J, Pittman B, Andrew Sewell R, Skosnik PD, D'Souza DC.	Prog Neuropsychopharmacol Biol Psychiatry. 2017 Oct 3;79(Pt B):176-183. doi: 10.1016/j.pnpbp.2017.06.019. Epub 2017 Jun 20.	Ranganathan M	Prog Neuropsychopharmacol Biol Psychiatry	2017	2017-06-24			10.1016/j.pnpbp.2017.06.019
28644037	Lower-Risk Cannabis Use Guidelines: A Comprehensive Update of Evidence and Recommendations	Fischer B, Russell C, Sabioni P, van den Brink W, Le Foll B, Hall W, Rehm J, Room R.	Am J Public Health. 2017 Aug;107(8):e1-e12. doi: 10.2105/AJPH.2017.303818. Epub 2017 Jun 23.	Fischer B	Am J Public Health	2017	2017-06-24	PMC5508136		10.2105/AJPH.2017.303818
28644052	A little "dab" will do ya' in: a case report of neuro-and cardiotoxicity following use of cannabis concentrates	Rickner SS, Cao D, Kleinschmidt K, Fleming S.	Clin Toxicol (Phila). 2017 Nov;55(9):1011-1013. doi: 10.1080/15563650.2017.1334914. Epub 2017 Jun 23.	Rickner SS	Clin Toxicol (Phila)	2017	2017-06-24			10.1080/15563650.2017.1334914
28645525	Placenta as alternative specimen to detect in utero cannabis exposure: A systematic review of the literature	Marchetti D, Di Masi G, Cittadini F, La Monaca G, De Giovanni N.	Reprod Toxicol. 2017 Oct;73:250-258. doi: 10.1016/j.reprotox.2017.06.049. Epub 2017 Jun 20.	Marchetti D	Reprod Toxicol	2017	2017-06-25			10.1016/j.reprotox.2017.06.049
28652111	Cannabinoid Reduces Inflammatory Cytokines, Tumor Necrosis Factor-α, and Type I Interferons in Dermatomyositis In Vitro	Robinson ES, Alves P, Bashir MM, Zeidi M, Feng R, Werth VP.	J Invest Dermatol. 2017 Nov;137(11):2445-2447. doi: 10.1016/j.jid.2017.05.035. Epub 2017 Jun 23.	Robinson ES	J Invest Dermatol	2017	2017-06-28	PMC5651184	NIHMS909075	10.1016/j.jid.2017.05.035
28653801	A putative lysophosphatidylinositol receptor GPR55 modulates hippocampal synaptic plasticity	Hurst K, Badgley C, Ellsworth T, Bell S, Friend L, Prince B, Welch J, Cowan Z, Williamson R, Lyon C, Anderson B, Poole B, Christensen M, McNeil M, Call J, Edwards JG.	Hippocampus. 2017 Sep;27(9):985-998. doi: 10.1002/hipo.22747. Epub 2017 Jun 27.	Hurst K	Hippocampus	2017	2017-06-28	PMC5568947	NIHMS884801	10.1002/hipo.22747
28655715	Incretin secretion in humans is under the influence of cannabinoid receptors	Chia CW, Carlson OD, Liu DD, González-Mariscal I, Santa-Cruz Calvo S, Egan JM.	Am J Physiol Endocrinol Metab. 2017 Sep 1;313(3):E359-E366. doi: 10.1152/ajpendo.00080.2017. Epub 2017 Jun 27.	Chia CW	Am J Physiol Endocrinol Metab	2017	2017-06-29	PMC5625085		10.1152/ajpendo.00080.2017
28657183	A matter of life and death: substance-caused and substance-related fatalities in Ibiza in 2015	Santacroce R, Ruiz Bennasar C, Sancho Jaraiz JR, Fiori F, Sarchione F, Angelini F, Catalano G, Carenti ML, Corkery JM, Schifano F, Di Giannantonio M, Martinotti G.	Hum Psychopharmacol. 2017 May;32(3). doi: 10.1002/hup.2592. Epub 2017 May 18.	Santacroce R	Hum Psychopharmacol	2017	2017-06-29			10.1002/hup.2592
28668837	Distribution and Metabolism of Lipocurc™ (Liposomal Curcumin) in Dog and Human Blood Cells: Species Selectivity and Pharmacokinetic Relevance	Bolger GT, Licollari A, Tan A, Greil R, Vcelar B, Majeed M, Helson L.	Anticancer Res. 2017 Jul;37(7):3483-3492. doi: 10.21873/anticanres.11716.	Bolger GT	Anticancer Res	2017	2017-07-03			10.21873/anticanres.11716
28671263	Small cause, large effect: Structural characterization of cutinases from Thermobifida cellulosilytica	Ribitsch D, Hromic A, Zitzenbacher S, Zartl B, Gamerith C, Pellis A, Jungbauer A, Łyskowski A, Steinkellner G, Gruber K, Tscheliessnig R, Herrero Acero E, Guebitz GM.	Biotechnol Bioeng. 2017 Nov;114(11):2481-2488. doi: 10.1002/bit.26372. Epub 2017 Aug 15.	Ribitsch D	Biotechnol Bioeng	2017	2017-07-04			10.1002/bit.26372
28673083	Transformation and Sorption of Illicit Drug Biomarkers in Sewer Biofilms	Ramin P, Brock AL, Causanilles A, Valverde-Pérez B, Emke E, de Voogt P, Polesel F, Plósz BG.	Environ Sci Technol. 2017 Sep 19;51(18):10572-10584. doi: 10.1021/acs.est.6b06277. Epub 2017 Aug 28.	Ramin P	Environ Sci Technol	2017	2017-07-05			10.1021/acs.est.6b06277
28680405	Cannabinoids and Vanilloids in Schizophrenia: Neurophysiological Evidence and Directions for Basic Research	Ruggiero RN, Rossignoli MT, De Ross JB, Hallak JEC, Leite JP, Bueno-Junior LS.	Front Pharmacol. 2017 Jun 21;8:399. doi: 10.3389/fphar.2017.00399. eCollection 2017.	Ruggiero RN	Front Pharmacol	2017	2017-07-07	PMC5478733		10.3389/fphar.2017.00399
28686594	Cannabinoids disrupt memory encoding by functionally isolating hippocampal CA1 from CA3	Sandler RA, Fetterhoff D, Hampson RE, Deadwyler SA, Marmarelis VZ.	PLoS Comput Biol. 2017 Jul 7;13(7):e1005624. doi: 10.1371/journal.pcbi.1005624. eCollection 2017 Jul.	Sandler RA	PLoS Comput Biol	2017	2017-07-08	PMC5521875		10.1371/journal.pcbi.1005624
28686986	Illicit drug consumption in school populations measured by wastewater analysis	Zuccato E, Gracia-Lor E, Rousis NI, Parabiaghi A, Senta I, Riva F, Castiglioni S.	Drug Alcohol Depend. 2017 Sep 1;178:285-290. doi: 10.1016/j.drugalcdep.2017.05.030. Epub 2017 Jun 24.	Zuccato E	Drug Alcohol Depend	2017	2017-07-08			10.1016/j.drugalcdep.2017.05.030
28688980	Hepatitis E virus seroprevalence rate among Eastern Mediterranean and middle eastern countries; A systematic review and pooled analysis	Karbalaie Niya MH, Rezaee-Zavareh MS, Ranaei A, Alavian SM.	Microb Pathog. 2017 Sep;110:252-256. doi: 10.1016/j.micpath.2017.06.045. Epub 2017 Jul 5.	Karbalaie Niya MH	Microb Pathog	2017	2017-07-10			10.1016/j.micpath.2017.06.045
28692354	Potential protective effects of polysaccharide extracted from Ulva lactuca against male reprotoxicity induced by thiacloprid	Kammoun I, Bkhairia I, Ben Abdallah F, Jaballi I, Ktari N, Boudawara O, Nasri M, Gharsallah N, Hakim A, Ben Amara I.	Arch Physiol Biochem. 2017 Dec;123(5):334-343. doi: 10.1080/13813455.2017.1347686. Epub 2017 Jul 10.	Kammoun I	Arch Physiol Biochem	2017	2017-07-11			10.1080/13813455.2017.1347686
28698130	Enzymatic hydrolysis of poly(ethyleneterephthalate) used for and analysed by pore modification of track-etched membranes	Gamerith C, Gajda M, Ortner A, Acero EH, Guebitz GM, Ulbricht M.	N Biotechnol. 2017 Oct 25;39(Pt A):42-50. doi: 10.1016/j.nbt.2017.06.007. Epub 2017 Jul 8.	Gamerith C	N Biotechnol	2017	2017-07-13			10.1016/j.nbt.2017.06.007
28703244	Photoreactions of 2-(furan-2-yl)-3-hydroxy-4H-chromen-4-one and 3-hydroxy-2-(thiophene-2-yl)-4H-chromen-4-one using cyclohexane and acetonitrile as solvents	Kaur K, Kaur R, Tomar J, Bansal M.	Photochem Photobiol Sci. 2017 Aug 9;16(8):1311-1319. doi: 10.1039/c7pp00106a.	Kaur K	Photochem Photobiol Sci	2017	2017-07-14			10.1039/c7pp00106a
28705744	The relationship between ocular trauma and substance abuse in emergency department patients	Chang SL, Patel V, Giltner J, Lee R, Marco CA.	Am J Emerg Med. 2017 Nov;35(11):1734-1737. doi: 10.1016/j.ajem.2017.07.015. Epub 2017 Jul 8.	Chang SL	Am J Emerg Med	2017	2017-07-15			10.1016/j.ajem.2017.07.015
28707583	Cannabis: An Overview of its Adverse Acute and Chronic Effects and its Implications	Ford TC, Hayley AC, Downey LA, Parrott AC.	Curr Drug Abuse Rev. 2017;10(1):6-18. doi: 10.2174/1874473710666170712113042.	Ford TC	Curr Drug Abuse Rev	2017	2017-07-15			10.2174/1874473710666170712113042
28715360	Contemporary management of subclavian and axillary artery injuries-A Western Trauma Association multicenter review	Waller CJ, Cogbill TH, Kallies KJ, Ramirez LD, Cardenas JM, Todd SR, Chapman KJ, Beckman MA, Sperry JL, Anto VP, Eriksson EA, Leon SM, Anand RJ, Pearlstein M, Capano-Wehrle L, Cothren Burlew C, Fox CJ, Cullinane DC, Roberts JC, Harrison PB, Berg GM, Haan JM, Lightwine K.	J Trauma Acute Care Surg. 2017 Dec;83(6):1023-1031. doi: 10.1097/TA.0000000000001645.	Waller CJ	J Trauma Acute Care Surg	2017	2017-07-18			10.1097/TA.0000000000001645
28716266	Sativex® effects on promoter methylation and on CNR1/CNR2 expression in peripheral blood mononuclear cells of progressive multiple sclerosis patients	Santoro M, Mirabella M, De Fino C, Bianco A, Lucchini M, Losavio F, Sabino A, Nociti V.	J Neurol Sci. 2017 Aug 15;379:298-303. doi: 10.1016/j.jns.2017.06.017. Epub 2017 Jun 15.	Santoro M	J Neurol Sci	2017	2017-07-19			10.1016/j.jns.2017.06.017
28716396	The role of pilin protein of Xenorhabdus nematophila against immune defense reactions of insects	Darsouei R, Karimi J, Dunphy GB.	J Insect Physiol. 2017 Aug;101:82-90. doi: 10.1016/j.jinsphys.2017.07.003. Epub 2017 Jul 14.	Darsouei R	J Insect Physiol	2017	2017-07-19			10.1016/j.jinsphys.2017.07.003
28719234	The In Vivo Effects of the CB(1)-Positive Allosteric Modulator GAT229 on Intraocular Pressure in Ocular Normotensive and Hypertensive Mice	Cairns EA, Szczesniak AM, Straiker AJ, Kulkarni PM, Pertwee RG, Thakur GA, Baldridge WH, Kelly MEM.	J Ocul Pharmacol Ther. 2017 Oct;33(8):582-590. doi: 10.1089/jop.2017.0037. Epub 2017 Jul 18.	Cairns EA	J Ocul Pharmacol Ther	2017	2017-07-19	PMC5649393		10.1089/jop.2017.0037
28722246	Delta-9-tetrahydrocannabinol decreases masticatory muscle sensitization in female rats through peripheral cannabinoid receptor activation	Wong H, Hossain S, Cairns BE.	Eur J Pain. 2017 Nov;21(10):1732-1742. doi: 10.1002/ejp.1085. Epub 2017 Jul 18.	Wong H	Eur J Pain	2017	2017-07-20			10.1002/ejp.1085
28724152	Cost of Incremental Expansion of an Existing Family Medicine Residency Program	Ashkin EA, Newton WP, Toomey B, Lingley R, Page CP.	Fam Med. 2017 Jul;49(7):544-547.	Ashkin EA	Fam Med	2017	2017-07-21
28724382	Activation of cannabinoid receptor type 2 attenuates surgery-induced cognitive impairment in mice through anti-inflammatory activity	Sun L, Dong R, Xu X, Yang X, Peng M.	J Neuroinflammation. 2017 Jul 19;14(1):138. doi: 10.1186/s12974-017-0913-7.	Sun L	J Neuroinflammation	2017	2017-07-21	PMC5518095		10.1186/s12974-017-0913-7
28728115	Smoked marijuana attenuates performance and mood disruptions during simulated night shift work	Keith DR, Gunderson EW, Haney M, Foltin RW, Hart CL.	Drug Alcohol Depend. 2017 Sep 1;178:534-543. doi: 10.1016/j.drugalcdep.2017.04.036. Epub 2017 Jun 28.	Keith DR	Drug Alcohol Depend	2017	2017-07-21	PMC5578830	NIHMS888676	10.1016/j.drugalcdep.2017.04.036
28728424	False-negative results in the immunoassay analysis of drugs of abuse: can adulterants be detected by sample check test?	Matriciani B, Huppertz B, Keller R, Weiskirchen R.	Ann Clin Biochem. 2018 May;55(3):348-354. doi: 10.1177/0004563217725089. Epub 2017 Sep 20.	Matriciani B	Ann Clin Biochem	2018	2017-07-22			10.1177/0004563217725089
28731613	Polyol Structure Influences Enzymatic Hydrolysis of Bio-Based 2,5-Furandicarboxylic Acid (FDCA) Polyesters	Haernvall K, Zitzenbacher S, Amer H, Zumstein MT, Sander M, McNeill K, Yamamoto M, Schick MB, Ribitsch D, Guebitz GM.	Biotechnol J. 2017 Sep;12(9). doi: 10.1002/biot.201600741. Epub 2017 Aug 10.	Haernvall K	Biotechnol J	2017	2017-07-22			10.1002/biot.201600741
28732147	Financial Incentives and Health Coaching to Improve Physical Activity Following Total Knee Replacement: A Randomized Controlled Trial	Losina E, Collins JE, Deshpande BR, Smith SR, Michl GL, Usiskin IM, Klara KM, Winter AR, Yang HY, Selzer F, Katz JN.	Arthritis Care Res (Hoboken). 2018 May;70(5):732-740. doi: 10.1002/acr.23324. Epub 2018 Apr 12.	Losina E	Arthritis Care Res (Hoboken)	2018	2017-07-22	PMC6334288	NIHMS1000864	10.1002/acr.23324
28733813	Individual and combined effects of cannabis and tobacco on drug reward processing in non-dependent users	Hindocha C, Lawn W, Freeman TP, Curran HV.	Psychopharmacology (Berl). 2017 Nov;234(21):3153-3163. doi: 10.1007/s00213-017-4698-2. Epub 2017 Jul 22.	Hindocha C	Psychopharmacology (Berl)	2017	2017-07-23	PMC5660839		10.1007/s00213-017-4698-2
28734904	Identifying novel members of the Wntless interactome through genetic and candidate gene approaches	Petko J, Tranchina T, Patel G, Levenson R, Justice-Bitner S.	Brain Res Bull. 2018 Apr;138:96-105. doi: 10.1016/j.brainresbull.2017.07.004. Epub 2017 Jul 20.	Petko J	Brain Res Bull	2018	2017-07-24	PMC6545234	NIHMS1031296	10.1016/j.brainresbull.2017.07.004
28736128	The effect of Pro NanoLipospheres (PNL) formulation containing natural absorption enhancers on the oral bioavailability of delta-9-tetrahydrocannabinol (THC) and cannabidiol (CBD) in a rat model	Cherniakov I, Izgelov D, Domb AJ, Hoffman A.	Eur J Pharm Sci. 2017 Nov 15;109:21-30. doi: 10.1016/j.ejps.2017.07.003. Epub 2017 Jul 20.	Cherniakov I	Eur J Pharm Sci	2017	2017-07-25			10.1016/j.ejps.2017.07.003
28736802	Psychotropic substances in house dusts: a preliminary assessment	Cecinato A, Romagnoli P, Perilli M, Balducci C.	Environ Sci Pollut Res Int. 2017 Sep;24(26):21256-21261. doi: 10.1007/s11356-017-9549-5. Epub 2017 Jul 24.	Cecinato A	Environ Sci Pollut Res Int	2017	2017-07-25			10.1007/s11356-017-9549-5
28746615	Estimated evolution of total pollutant gas emissions associated with vehicle activity in the Metropolitan Region of Porto Alegre until 2030	Chovert AD, Alonso MF.	An Acad Bras Cienc. 2017;89(3 Suppl):1971-1983. doi: 10.1590/0001-3765201720160117. Epub 2017 Jul 24.	Chovert AD	An Acad Bras Cienc	2017	2017-07-27			10.1590/0001-3765201720160117
28749455	Primary Biliary Cholangitis Alters Functional Connections of the Brain's Deep Gray Matter	Mosher VAL, Swain MG, Pang JXQ, Kaplan GG, Sharkey KA, MacQueen GM, Goodyear BG.	Clin Transl Gastroenterol. 2017 Jul 27;8(7):e107. doi: 10.1038/ctg.2017.34.	Mosher VAL	Clin Transl Gastroenterol	2017	2017-07-28	PMC5539342		10.1038/ctg.2017.34
28750809	Assessing Allosteric Modulation of CB(1) at the Receptor and Cellular Levels	Scott CE, Kendall DA.	Methods Enzymol. 2017;593:317-342. doi: 10.1016/bs.mie.2017.05.002. Epub 2017 Jul 5.	Scott CE	Methods Enzymol	2017	2017-07-29	PMC5710755	NIHMS921259	10.1016/bs.mie.2017.05.002
28759769	Changes in illicit, licit and stimulant designer drug use patterns in South-East Hungary between 2008 and 2015	Árok Z, Csesztregi T, Sija É, Varga T, Kereszty ÉM, Tóth RA, Institóris L.	Leg Med (Tokyo). 2017 Sep;28:37-44. doi: 10.1016/j.legalmed.2017.07.001. Epub 2017 Jul 8.	Árok Z	Leg Med (Tokyo)	2017	2017-08-01			10.1016/j.legalmed.2017.07.001
28763462	Sativex in resistant multiple sclerosis spasticity: Discontinuation study in a large population of Italian patients (SA.FE. study)	Messina S, Solaro C, Righini I, Bergamaschi R, Bonavita S, Bossio RB, Brescia Morra V, Costantino G, Cavalla P, Centonze D, Comi G, Cottone S, Danni MC, Francia A, Gajofatto A, Gasperini C, Zaffaroni M, Petrucci L, Signoriello E, Maniscalco GT, Spinicci G, Matta M, Mirabella M, Pedà G, Castelli L, Rovaris M, Sessa E, Spitaleri D, Paolicelli D, Granata A, Zappia M, Patti F; SA.FE. study group.	PLoS One. 2017 Aug 1;12(8):e0180651. doi: 10.1371/journal.pone.0180651. eCollection 2017.	Messina S	PLoS One	2017	2017-08-02	PMC5538735		10.1371/journal.pone.0180651
28766664	Tetrahydrocurcumin is more effective than curcumin in inducing the apoptosis of H22 cells via regulation of a mitochondrial apoptosis pathway in ascites tumor-bearing mice	Liu W, Zhang Z, Lin G, Luo D, Chen H, Yang H, Liang J, Liu Y, Xie J, Su Z, Cao H.	Food Funct. 2017 Sep 20;8(9):3120-3129. doi: 10.1039/c7fo00484b.	Liu W	Food Funct	2017	2017-08-03			10.1039/c7fo00484b
28771093	Placebo Effects of Edible Cannabis: Reported Intoxication Effects at a 30-Minute Delay	Loflin MJE, Earleywine M, Farmer S, Slavin M, Luba R, Bonn-Miller M.	J Psychoactive Drugs. 2017 Nov-Dec;49(5):393-397. doi: 10.1080/02791072.2017.1354409. Epub 2017 Aug 3.	Loflin MJE	J Psychoactive Drugs	2017	2017-08-04			10.1080/02791072.2017.1354409
28772109	Differentiation of Cannabis subspecies by THCA synthase gene analysis using RFLP	Cirovic N, Kecmanovic M, Keckarevic D, Keckarevic Markovic M.	J Forensic Leg Med. 2017 Oct;51:81-84. doi: 10.1016/j.jflm.2017.07.015. Epub 2017 Jul 25.	Cirovic N	J Forensic Leg Med	2017	2017-08-04			10.1016/j.jflm.2017.07.015
28780725	A review of oral cannabinoids and medical marijuana for the treatment of chemotherapy-induced nausea and vomiting: a focus on pharmacokinetic variability and pharmacodynamics	Badowski ME.	Cancer Chemother Pharmacol. 2017 Sep;80(3):441-449. doi: 10.1007/s00280-017-3387-5. Epub 2017 Aug 5.	Badowski ME	Cancer Chemother Pharmacol	2017	2017-08-07	PMC5573753		10.1007/s00280-017-3387-5
28784303	The effect of central nervous system depressant, stimulant and hallucinogenic drugs on injury severity in patients admitted for trauma	Cordovilla-Guardia S, Lardelli-Claret P, Vilar-López R, López-Espuela F, Guerrero-López F, Fernández-Mondéjar E.	Gac Sanit. 2019 Jan-Feb;33(1):4-9. doi: 10.1016/j.gaceta.2017.06.006. Epub 2017 Aug 5.	Cordovilla-Guardia S	Gac Sanit	2019	2017-08-09			10.1016/j.gaceta.2017.06.006
28789567	Effect of marijuana use on cardiovascular and cerebrovascular mortality: A study using the National Health and Nutrition Examination Survey linked mortality file	Yankey BA, Rothenberg R, Strasser S, Ramsey-White K, Okosun IS.	Eur J Prev Cardiol. 2017 Nov;24(17):1833-1840. doi: 10.1177/2047487317723212. Epub 2017 Aug 8.	Yankey BA	Eur J Prev Cardiol	2017	2017-08-10			10.1177/2047487317723212
28799497	Cannabis Phenolics and their Bioactivities	Pollastro F, Minassi A, Fresu LG.	Curr Med Chem. 2018;25(10):1160-1185. doi: 10.2174/0929867324666170810164636.	Pollastro F	Curr Med Chem	2018	2017-08-12			10.2174/0929867324666170810164636
28802951	Smoke on the water-Oral fluid analysis at sea	Griffiths A, Leonars R, Hadley L, Stephenson M, Teale R.	Forensic Sci Int. 2017 Sep;278:361-366. doi: 10.1016/j.forsciint.2017.07.028. Epub 2017 Jul 31.	Griffiths A	Forensic Sci Int	2017	2017-08-14			10.1016/j.forsciint.2017.07.028
28803323	Effect of footshock stress on place conditioning produced by Δ(9)-tetrahydrocannabinol and the fatty acid amide hydrolase (FAAH) inhibitor, URB597, in Sprague-Dawley rats	DeVuono MV, Wills KL, MacPherson DV, Hrelja KM, Parker LA.	Psychopharmacology (Berl). 2017 Nov;234(21):3229-3240. doi: 10.1007/s00213-017-4714-6. Epub 2017 Aug 12.	DeVuono MV	Psychopharmacology (Berl)	2017	2017-08-14			10.1007/s00213-017-4714-6
28806081	Chlorination Kinetics of 11-Nor-9-carboxy-Δ(9)-tetrahydrocannabinol: Effects of pH and Humic Acid	Mackie AL, Park YR, Gagnon GA.	Environ Sci Technol. 2017 Sep 19;51(18):10711-10717. doi: 10.1021/acs.est.7b02234. Epub 2017 Aug 29.	Mackie AL	Environ Sci Technol	2017	2017-08-15			10.1021/acs.est.7b02234
28806553	Thiacloprid adsorption and leaching in soil: Effect of the composition of irrigation solutions	Rodríguez-Liébana JA, Mingorance MD, Peña A.	Sci Total Environ. 2018 Jan 1;610-611:367-376. doi: 10.1016/j.scitotenv.2017.08.028. Epub 2017 Aug 11.	Rodríguez-Liébana JA	Sci Total Environ	2018	2017-08-15			10.1016/j.scitotenv.2017.08.028
28807415	The impact of seismic air gun exposure on the haemolymph physiology and nutritional condition of spiny lobster, Jasus edwardsii	Fitzgibbon QP, Day RD, McCauley RD, Simon CJ, Semmens JM.	Mar Pollut Bull. 2017 Dec 15;125(1-2):146-156. doi: 10.1016/j.marpolbul.2017.08.004. Epub 2017 Aug 12.	Fitzgibbon QP	Mar Pollut Bull	2017	2017-08-16			10.1016/j.marpolbul.2017.08.004
28808073	Unintentional Cannabis Intoxication in Toddlers	Claudet I, Mouvier S, Labadie M, Manin C, Michard-Lenoir AP, Eyer D, Dufour D; Marie-Jeanne Study Group.	Pediatrics. 2017 Sep;140(3):e20170017. doi: 10.1542/peds.2017-0017. Epub 2017 Aug 14.	Claudet I	Pediatrics	2017	2017-08-16			10.1542/peds.2017-0017
28809934	Long-term exposure to air pollution and the incidence of Parkinson's disease: A nested case-control study	Chen CY, Hung HJ, Chang KH, Hsu CY, Muo CH, Tsai CH, Wu TN.	PLoS One. 2017 Aug 15;12(8):e0182834. doi: 10.1371/journal.pone.0182834. eCollection 2017.	Chen CY	PLoS One	2017	2017-08-16	PMC5557354		10.1371/journal.pone.0182834
28814125	Recreational drug use at a major music festival: trend analysis of anonymised pooled urine	Hoegberg LCG, Christiansen C, Soe J, Telving R, Andreasen MF, Staerk D, Christrup LL, Kongstad KT.	Clin Toxicol (Phila). 2018 Apr;56(4):245-255. doi: 10.1080/15563650.2017.1360496. Epub 2017 Aug 17.	Hoegberg LCG	Clin Toxicol (Phila)	2018	2017-08-18			10.1080/15563650.2017.1360496
28815938	Optimization of recombinant β-glucuronidase hydrolysis and quantification of eight urinary cannabinoids and metabolites by liquid chromatography tandem mass spectrometry	Sempio C, Scheidweiler KB, Barnes AJ, Huestis MA.	Drug Test Anal. 2018 Mar;10(3):518-529. doi: 10.1002/dta.2230. Epub 2017 Aug 16.	Sempio C	Drug Test Anal	2018	2017-08-18			10.1002/dta.2230
28816239	Hippocampal Protein Kinase C Signaling Mediates the Short-Term Memory Impairment Induced by Delta9-Tetrahydrocannabinol	Busquets-Garcia A, Gomis-González M, Salgado-Mendialdúa V, Galera-López L, Puighermanal E, Martín-García E, Maldonado R, Ozaita A.	Neuropsychopharmacology. 2018 Apr;43(5):1021-1031. doi: 10.1038/npp.2017.175. Epub 2017 Aug 17.	Busquets-Garcia A	Neuropsychopharmacology	2018	2017-08-18	PMC5854793		10.1038/npp.2017.175
28818631	Topical Medical Cannabis: A New Treatment for Wound Pain-Three Cases of Pyoderma Gangrenosum	Maida V, Corban J.	J Pain Symptom Manage. 2017 Nov;54(5):732-736. doi: 10.1016/j.jpainsymman.2017.06.005. Epub 2017 Aug 14.	Maida V	J Pain Symptom Manage	2017	2017-08-19			10.1016/j.jpainsymman.2017.06.005
28823723	Understanding marijuana's effects on functional connectivity of the default mode network in patients with schizophrenia and co-occurring cannabis use disorder: A pilot investigation	Whitfield-Gabrieli S, Fischer AS, Henricks AM, Khokhar JY, Roth RM, Brunette MF, Green AI.	Schizophr Res. 2018 Apr;194:70-77. doi: 10.1016/j.schres.2017.07.029. Epub 2017 Aug 18.	Whitfield-Gabrieli S	Schizophr Res	2018	2017-08-22	PMC6886576	NIHMS1542479	10.1016/j.schres.2017.07.029
28826533	Spicing Up Pharmacology: A Review of Synthetic Cannabinoids From Structure to Adverse Events	Davidson C, Opacka-Juffry J, Arevalo-Martin A, Garcia-Ovejero D, Molina-Holgado E, Molina-Holgado F.	Adv Pharmacol. 2017;80:135-168. doi: 10.1016/bs.apha.2017.05.001. Epub 2017 Jun 20.	Davidson C	Adv Pharmacol	2017	2017-08-23			10.1016/bs.apha.2017.05.001
28826544	Cannabis Pharmacology: The Usual Suspects and a Few Promising Leads	Russo EB, Marcu J.	Adv Pharmacol. 2017;80:67-134. doi: 10.1016/bs.apha.2017.03.004. Epub 2017 Jun 5.	Russo EB	Adv Pharmacol	2017	2017-08-23			10.1016/bs.apha.2017.03.004
28829956	Adsorption of 5f-electron atoms (ThCm) on graphene surface: An all-electron ZORA-DFT study	Du J, Jiang G.	J Colloid Interface Sci. 2017 Dec 15;508:159-166. doi: 10.1016/j.jcis.2017.08.015. Epub 2017 Aug 7.	Du J	J Colloid Interface Sci	2017	2017-08-23			10.1016/j.jcis.2017.08.015
28830121	Drugged Driving in Wisconsin: Oral Fluid Versus Blood	Edwards LD, Smith KL, Savage T.	J Anal Toxicol. 2017 Jul 1;41(6):523-529. doi: 10.1093/jat/bkx051.	Edwards LD	J Anal Toxicol	2017	2017-08-24			10.1093/jat/bkx051
28830124	Postmortem Fluid and Tissue Concentrations of THC, 11-OH-THC and THC-COOH	Saenz SR, Lewis RJ, Angier MK, Wagner JR.	J Anal Toxicol. 2017 Jul 1;41(6):508-516. doi: 10.1093/jat/bkx033.	Saenz SR	J Anal Toxicol	2017	2017-08-24			10.1093/jat/bkx033
28833102	Tetrahydrocurcumin ameliorates homocysteine-mediated mitochondrial remodeling in brain endothelial cells	Vacek JC, Behera J, George AK, Kamat PK, Kalani A, Tyagi N.	J Cell Physiol. 2018 Apr;233(4):3080-3092. doi: 10.1002/jcp.26145. Epub 2017 Nov 14.	Vacek JC	J Cell Physiol	2018	2017-08-24	PMC6035784	NIHMS903889	10.1002/jcp.26145
28834845	Primary Care Residents in Teaching Health Centers: Their Intentions to Practice in Underserved Settings After Residency Training	Talib Z, Jewers MM, Strasser JH, Popiel DK, Goldberg DG, Chen C, Kepley H, Mullan F, Regenstein M.	Acad Med. 2018 Jan;93(1):98-103. doi: 10.1097/ACM.0000000000001889.	Talib Z	Acad Med	2018	2017-08-24			10.1097/ACM.0000000000001889
28838808	Characterization of structurally novel G protein biased CB(1) agonists: Implications for drug development	Ford BM, Franks LN, Tai S, Fantegrossi WE, Stahl EL, Berquist MD, Cabanlong CV, Wilson CD, Penthala NR, Crooks PA, Prather PL.	Pharmacol Res. 2017 Nov;125(Pt B):161-177. doi: 10.1016/j.phrs.2017.08.008. Epub 2017 Aug 23.	Ford BM	Pharmacol Res	2017	2017-08-26	PMC5849406	NIHMS908014	10.1016/j.phrs.2017.08.008
28841427	Qualitative and quantitative measurement of cannabinoids in cannabis using modified HPLC/DAD method	Patel B, Wene D, Fan ZT.	J Pharm Biomed Anal. 2017 Nov 30;146:15-23. doi: 10.1016/j.jpba.2017.07.021. Epub 2017 Aug 10.	Patel B	J Pharm Biomed Anal	2017	2017-08-26			10.1016/j.jpba.2017.07.021
28842449	Effect of informed consent on patient characteristics in a stroke thrombolysis trial	Thomalla G, Boutitie F, Fiebach JB, Simonsen CZ, Nighoghossian N, Pedraza S, Lemmens R, Roy P, Muir KW, Heesen C, Ebinger M, Ford I, Cheng B, Cho TH, Puig J, Thijs V, Endres M, Fiehler J, Gerloff C.	Neurology. 2017 Sep 26;89(13):1400-1407. doi: 10.1212/WNL.0000000000004414. Epub 2017 Aug 25.	Thomalla G	Neurology	2017	2017-08-27	PMC5649757		10.1212/WNL.0000000000004414
28843425	Does being drunk or high cause HIV sexual risk behavior? A systematic review of drug administration studies	Berry MS, Johnson MW.	Pharmacol Biochem Behav. 2018 Jan;164:125-138. doi: 10.1016/j.pbb.2017.08.009. Epub 2017 Aug 24.	Berry MS	Pharmacol Biochem Behav	2018	2017-08-28	PMC5747990	NIHMS904110	10.1016/j.pbb.2017.08.009
28846715	Needs and concerns of transgender individuals regarding interdisciplinary transgender healthcare: A non-clinical online survey	Eyssel J, Koehler A, Dekker A, Sehner S, Nieder TO.	PLoS One. 2017 Aug 28;12(8):e0183014. doi: 10.1371/journal.pone.0183014. eCollection 2017.	Eyssel J	PLoS One	2017	2017-08-29	PMC5573291		10.1371/journal.pone.0183014
28846955	Synthetic cannabinoids found in "spice" products alter body temperature and cardiovascular parameters in conscious male rats	Schindler CW, Gramling BR, Justinova Z, Thorndike EB, Baumann MH.	Drug Alcohol Depend. 2017 Oct 1;179:387-394. doi: 10.1016/j.drugalcdep.2017.07.029. Epub 2017 Aug 18.	Schindler CW	Drug Alcohol Depend	2017	2017-08-29	PMC5599362	NIHMS900722	10.1016/j.drugalcdep.2017.07.029
28847562	Cannabis use during pregnancy: Pharmacokinetics and effects on child development	Grant KS, Petroff R, Isoherranen N, Stella N, Burbacher TM.	Pharmacol Ther. 2018 Feb;182:133-151. doi: 10.1016/j.pharmthera.2017.08.014. Epub 2017 Aug 25.	Grant KS	Pharmacol Ther	2018	2017-08-30	PMC6211194	NIHMS991259	10.1016/j.pharmthera.2017.08.014
28848078	Targeting the Endocannabinoid/CB1 Receptor System For Treating Major Depression Through Antidepressant Activities of Curcumin and Dexanabinol-Loaded Solid Lipid Nanoparticles	He X, Yang L, Wang M, Zhuang X, Huang R, Zhu R, Wang S.	Cell Physiol Biochem. 2017;42(6):2281-2294. doi: 10.1159/000480001. Epub 2017 Aug 17.	He X	Cell Physiol Biochem	2017	2017-08-30			10.1159/000480001
28850903	Confirmed marijuana use and lymphocyte count in black people living with HIV	Keen L 2nd, Abbate A, Blanden G, Priddie C, Moeller FG, Rathore M.	Drug Alcohol Depend. 2017 Nov 1;180:22-25. doi: 10.1016/j.drugalcdep.2017.07.026. Epub 2017 Aug 16.	Keen L 2nd	Drug Alcohol Depend	2017	2017-08-30			10.1016/j.drugalcdep.2017.07.026
28861499	Even High Doses of Oral Cannabidol Do Not Cause THC-Like Effects in Humans: Comment on Merrick et al. Cannabis and Cannabinoid Research 2016;1(1):102-112; DOI: 10.1089/can.2015.0004	Grotenhermen F, Russo E, Zuardi AW.	Cannabis Cannabinoid Res. 2017 Jan 1;2(1):1-4. doi: 10.1089/can.2016.0036. eCollection 2017.	Grotenhermen F	Cannabis Cannabinoid Res	2017	2017-09-02	PMC5531368		10.1089/can.2016.0036
28861500	Conversion of Cannabidiol Following Oral Administration: Authors' Response to Grotenhermen et al. DOI: 10.1089/can.2016.0036	Bonn-Miller MO, Banks SL, Sebree T.	Cannabis Cannabinoid Res. 2017 Jan 1;2(1):5-7. doi: 10.1089/can.2016.0038. eCollection 2017.	Bonn-Miller MO	Cannabis Cannabinoid Res	2017	2017-09-02	PMC5569618		10.1089/can.2016.0038
28861503	Identification of Terpenoid Chemotypes Among High (-)-trans-Δ(9)- Tetrahydrocannabinol-Producing Cannabis sativa L. Cultivars	Fischedick JT.	Cannabis Cannabinoid Res. 2017 Mar 1;2(1):34-47. doi: 10.1089/can.2016.0040. eCollection 2017.	Fischedick JT	Cannabis Cannabinoid Res	2017	2017-09-02	PMC5436332		10.1089/can.2016.0040
28861507	A Conversion of Oral Cannabidiol to Delta9-Tetrahydrocannabinol Seems Not to Occur in Humans	Nahler G, Grotenhermen F, Zuardi AW, Crippa JAS.	Cannabis Cannabinoid Res. 2017 May 1;2(1):81-86. doi: 10.1089/can.2017.0009. eCollection 2017.	Nahler G	Cannabis Cannabinoid Res	2017	2017-09-02	PMC5510776		10.1089/can.2017.0009
28861508	Affinity and Efficacy Studies of Tetrahydrocannabinolic Acid A at Cannabinoid Receptor Types One and Two	McPartland JM, MacDonald C, Young M, Grant PS, Furkert DP, Glass M.	Cannabis Cannabinoid Res. 2017 May 1;2(1):87-95. doi: 10.1089/can.2016.0032. eCollection 2017.	McPartland JM	Cannabis Cannabinoid Res	2017	2017-09-02	PMC5510775		10.1089/can.2016.0032
28861509	Cannabis and Pain: A Clinical Review	Hill KP, Palastro MD, Johnson B, Ditre JW.	Cannabis Cannabinoid Res. 2017 May 1;2(1):96-104. doi: 10.1089/can.2017.0017. eCollection 2017.	Hill KP	Cannabis Cannabinoid Res	2017	2017-09-02	PMC5549367		10.1089/can.2017.0017
28861511	Explorative Placebo-Controlled Double-Blind Intervention Study with Low Doses of Inhaled Δ9-Tetrahydrocannabinol and Cannabidiol Reveals No Effect on Sweet Taste Intensity Perception and Liking in Humans	de Bruijn SEM, de Graaf C, Witkamp RF, Jager G.	Cannabis Cannabinoid Res. 2017 Jun 1;2(1):114-122. doi: 10.1089/can.2017.0018. eCollection 2017.	de Bruijn SEM	Cannabis Cannabinoid Res	2017	2017-09-02	PMC5569584		10.1089/can.2017.0018
28866743	Effects of oral Δ(9)-tetrahydrocannabinol on the cerebral processing of olfactory input in healthy non-addicted subjects	Walter C, Oertel BG, Felden L, Nöth U, Vermehren J, Deichmann R, Lötsch J.	Eur J Clin Pharmacol. 2017 Dec;73(12):1579-1587. doi: 10.1007/s00228-017-2331-2. Epub 2017 Sep 2.	Walter C	Eur J Clin Pharmacol	2017	2017-09-04			10.1007/s00228-017-2331-2
28872348	Marijuana and Breastfeeding: Applicability of the Current Literature to Clinical Practice	Mourh J, Rowe H.	Breastfeed Med. 2017 Dec;12(10):582-596. doi: 10.1089/bfm.2017.0020. Epub 2017 Sep 5.	Mourh J	Breastfeed Med	2017	2017-09-06			10.1089/bfm.2017.0020
28875876	Commercial herbal medicines used as African traditional medicines: Ngoma Herbal Tonic Immune Booster interferes with a rapid urine drug screening test	Mothibe ME, Osuch E, Kahler-Venter CP.	S Afr Med J. 2017 Aug 25;107(9):734-737. doi: 10.7196/SAMJ.2017.v107i9.12197.	Mothibe ME	S Afr Med J	2017	2017-09-07			10.7196/SAMJ.2017.v107i9.12197
28875990	Clinical and Preclinical Evidence for Functional Interactions of Cannabidiol and Δ(9)-Tetrahydrocannabinol	Boggs DL, Nguyen JD, Morgenson D, Taffe MA, Ranganathan M.	Neuropsychopharmacology. 2018 Jan;43(1):142-154. doi: 10.1038/npp.2017.209. Epub 2017 Sep 6.	Boggs DL	Neuropsychopharmacology	2018	2017-09-07	PMC5719112		10.1038/npp.2017.209
28877764	Perilipin-2 modulates dietary fat-induced microbial global gene expression profiles in the mouse intestine	Xiong X, Bales ES, Ir D, Robertson CE, McManaman JL, Frank DN, Parkinson J.	Microbiome. 2017 Sep 6;5(1):117. doi: 10.1186/s40168-017-0327-x.	Xiong X	Microbiome	2017	2017-09-08	PMC5588750		10.1186/s40168-017-0327-x
28878698	Synthetic Cathinone and Cannabinoid Designer Drugs Pose a Major Risk for Public Health	Weinstein AM, Rosca P, Fattore L, London ED.	Front Psychiatry. 2017 Aug 23;8:156. doi: 10.3389/fpsyt.2017.00156. eCollection 2017.	Weinstein AM	Front Psychiatry	2017	2017-09-08	PMC5572353		10.3389/fpsyt.2017.00156
28879802	Anti-nociceptive interactions between opioids and a cannabinoid receptor 2 agonist in inflammatory pain	Yuill MB, Hale DE, Guindon J, Morgan DJ.	Mol Pain. 2017 Jan-Dec;13:1744806917728227. doi: 10.1177/1744806917728227.	Yuill MB	Mol Pain	2017	2017-09-08	PMC5593227		10.1177/1744806917728227
28882919	A randomised controlled cross-over double-blind pilot study protocol on THC:CBD oromucosal spray efficacy as an add-on therapy for post-stroke spasticity	Marinelli L, Balestrino M, Mori L, Puce L, Rosa GM, Giorello L, Currà A, Fattapposta F, Serrati C, Gandolfo C, Abbruzzese G, Trompetto C.	BMJ Open. 2017 Sep 7;7(9):e016843. doi: 10.1136/bmjopen-2017-016843.	Marinelli L	BMJ Open	2017	2017-09-09	PMC5595207		10.1136/bmjopen-2017-016843
28890215	Piperine-pro-nanolipospheres as a novel oral delivery system of cannabinoids: Pharmacokinetic evaluation in healthy volunteers in comparison to buccal spray administration	Cherniakov I, Izgelov D, Barasch D, Davidson E, Domb AJ, Hoffman A.	J Control Release. 2017 Nov 28;266:1-7. doi: 10.1016/j.jconrel.2017.09.011. Epub 2017 Sep 8.	Cherniakov I	J Control Release	2017	2017-09-12			10.1016/j.jconrel.2017.09.011
28892757	11-nor-9-carboxy-Δ(9)-tetrahydrocannabinol glucuronide exhibits acyl-migration isomers	Hanisch S, Paulke A, Toennes SW.	J Pharm Biomed Anal. 2017 Nov 30;146:261-265. doi: 10.1016/j.jpba.2017.08.044. Epub 2017 Aug 31.	Hanisch S	J Pharm Biomed Anal	2017	2017-09-12			10.1016/j.jpba.2017.08.044
28893436	Death after 25C-NBOMe and 25H-NBOMe consumption	Morini L, Bernini M, Vezzoli S, Restori M, Moretti M, Crenna S, Papa P, Locatelli C, Osculati AMM, Vignali C, Groppi A.	Forensic Sci Int. 2017 Oct;279:e1-e6. doi: 10.1016/j.forsciint.2017.08.028. Epub 2017 Sep 5.	Morini L	Forensic Sci Int	2017	2017-09-13			10.1016/j.forsciint.2017.08.028
28914627	Antinociceptive effects of JWH015 in female and male rats	Craft RM, Greene NZ, Wakley AA.	Behav Pharmacol. 2018 Apr;29(2 and 3-Spec Issue):280-289. doi: 10.1097/FBP.0000000000000337.	Craft RM	Behav Pharmacol	2018	2017-09-16	PMC5849479	NIHMS895907	10.1097/FBP.0000000000000337
28916100	Improving wastewater-based epidemiology to estimate cannabis use: focus on the initial aspects of the analytical procedure	Causanilles A, Baz-Lomba JA, Burgard DA, Emke E, González-Mariño I, Krizman-Matasic I, Li A, Löve ASC, McCall AK, Montes R, van Nuijs ALN, Ort C, Quintana JB, Senta I, Terzic S, Hernandez F, de Voogt P, Bijlsma L.	Anal Chim Acta. 2017 Oct 2;988:27-33. doi: 10.1016/j.aca.2017.08.011. Epub 2017 Aug 18.	Causanilles A	Anal Chim Acta	2017	2017-09-17			10.1016/j.aca.2017.08.011
28917442	ABCB1 C3435T polymorphism is associated with tetrahydrocannabinol blood levels in heavy cannabis users	Kebir O, Lafaye G, Blecha L, Chaumette B, Mouaffak F, Laqueille X, Benyamina A.	Psychiatry Res. 2018 Apr;262:357-358. doi: 10.1016/j.psychres.2017.09.006. Epub 2017 Sep 9.	Kebir O	Psychiatry Res	2018	2017-09-18			10.1016/j.psychres.2017.09.006
28921453	Upper and lower limbs composition: a comparison between anthropometry and dual-energy X-ray absorptiometry in healthy people	Diano D, Ponti F, Guerri S, Mercatelli D, Amadori M, Aparisi Gómez MP, Battista G, Guglielmi G, Bazzocchi A.	Arch Osteoporos. 2017 Sep 18;12(1):78. doi: 10.1007/s11657-017-0374-8.	Diano D	Arch Osteoporos	2017	2017-09-19			10.1007/s11657-017-0374-8
28921814	Nabilone pharmacotherapy for cannabis dependence: A randomized, controlled pilot study	Hill KP, Palastro MD, Gruber SA, Fitzmaurice GM, Greenfield SF, Lukas SE, Weiss RD.	Am J Addict. 2017 Dec;26(8):795-801. doi: 10.1111/ajad.12622. Epub 2017 Sep 18.	Hill KP	Am J Addict	2017	2017-09-19	PMC5699926	NIHMS904133	10.1111/ajad.12622
28923526	Results of a Double-Blind, Randomized, Placebo-Controlled Study of Nabiximols Oromucosal Spray as an Adjunctive Therapy in Advanced Cancer Patients with Chronic Uncontrolled Pain	Lichtman AH, Lux EA, McQuade R, Rossetti S, Sanchez R, Sun W, Wright S, Kornyeyeva E, Fallon MT.	J Pain Symptom Manage. 2018 Feb;55(2):179-188.e1. doi: 10.1016/j.jpainsymman.2017.09.001. Epub 2017 Sep 18.	Lichtman AH	J Pain Symptom Manage	2018	2017-09-20			10.1016/j.jpainsymman.2017.09.001
28926863	Evaluation of Cannabinoid and Terpenoid Content: Cannabis Flower Compared to Supercritical CO2 Concentrate	Sexton M, Shelton K, Haley P, West M.	Planta Med. 2018 Mar;84(4):234-241. doi: 10.1055/s-0043-119361. Epub 2017 Sep 19.	Sexton M	Planta Med	2018	2017-09-20			10.1055/s-0043-119361
28932159	The use of performance-enhancing substances (doping) by athletes in Saudi Arabia	Al Ghobain M.	J Family Community Med. 2017 Sep-Dec;24(3):151-155. doi: 10.4103/jfcm.JFCM_122_16.	Al Ghobain M	J Family Community Med	2017	2017-09-22	PMC5596627		10.4103/jfcm.JFCM_122_16
28933048	Delta-9-Tetrahydrocannabinol (∆(9)-THC) Induce Neurogenesis and Improve Cognitive Performances of Male Sprague Dawley Rats	Suliman NA, Taib CNM, Moklas MAM, Basir R.	Neurotox Res. 2018 Feb;33(2):402-411. doi: 10.1007/s12640-017-9806-x. Epub 2017 Sep 21.	Suliman NA	Neurotox Res	2018	2017-09-22	PMC5766723		10.1007/s12640-017-9806-x
28934522	Effects of Cannabinoid Agonists and Antagonists on Sleep and Breathing in Sprague-Dawley Rats	Calik MW, Carley DW.	Sleep. 2017 Sep 1;40(9):zsx112. doi: 10.1093/sleep/zsx112.	Calik MW	Sleep	2017	2017-09-22	PMC5806547		10.1093/sleep/zsx112
28934780	Efficacy of Cannabis-Based Medicines for Pain Management: A Systematic Review and Meta-Analysis of Randomized Controlled Trials	Aviram J, Samuelly-Leichtag G.	Pain Physician. 2017 Sep;20(6):E755-E796.	Aviram J	Pain Physician	2017	2017-09-22
28935439	Comparison of cannabinoids with known analgesics using a novel high throughput zebrafish larval model of nociception	Ellis LD, Berrue F, Morash M, Achenbach JC, Hill J, McDougall JJ.	Behav Brain Res. 2018 Jan 30;337:151-159. doi: 10.1016/j.bbr.2017.09.028. Epub 2017 Sep 19.	Ellis LD	Behav Brain Res	2018	2017-09-23			10.1016/j.bbr.2017.09.028
28942005	Relating Observed Psychoactive Effects to the Plasma Concentrations of Delta-9-Tetrahydrocannabinol and Its Active Metabolite: An Effect-Compartment Modeling Approach	Awasthi R, An G, Donovan MD, Boles Ponto LL.	J Pharm Sci. 2018 Feb;107(2):745-755. doi: 10.1016/j.xphs.2017.09.009. Epub 2017 Sep 20.	Awasthi R	J Pharm Sci	2018	2017-09-25			10.1016/j.xphs.2017.09.009
28942374	Toxicological findings in suspected drug-impaired drivers in Norway - Trends during 1990-2015	Valen A, Bogstrand ST, Vindenes V, Gjerde H.	Forensic Sci Int. 2017 Nov;280:15-24. doi: 10.1016/j.forsciint.2017.09.010. Epub 2017 Sep 15.	Valen A	Forensic Sci Int	2017	2017-09-25			10.1016/j.forsciint.2017.09.010
28944090	Rapid Identification of Buprenorphine in Patient Saliva	Farquharson S, Dana K, Shende C, Gladding Z, Newcomb J, Dascher J, Petrakis IL, Arias AJ.	J Anal Bioanal Tech. 2017 Jun;8(3):368. doi: 10.4172/2155-9872.1000368. Epub 2017 Jun 23.	Farquharson S	J Anal Bioanal Tech	2017	2017-09-26	PMC5604842	NIHMS896418	10.4172/2155-9872.1000368
28944449	Cannabis use among patients at a comprehensive cancer center in a state with legalized medicinal and recreational use	Pergam SA, Woodfield MC, Lee CM, Cheng GS, Baker KK, Marquis SR, Fann JR.	Cancer. 2017 Nov 15;123(22):4488-4497. doi: 10.1002/cncr.30879. Epub 2017 Sep 25.	Pergam SA	Cancer	2017	2017-09-26	PMC5698756		10.1002/cncr.30879
28945508	Alternate approaches for assessing impacts of oil sands development on air quality: A case study using the First Nation Community of Fort McKay	Davidson C, Spink D.	J Air Waste Manag Assoc. 2018 Apr;68(4):308-328. doi: 10.1080/10962247.2017.1377648.	Davidson C	J Air Waste Manag Assoc	2018	2017-09-26			10.1080/10962247.2017.1377648
28947487	Cannabinoid CB(1) Discrimination: Effects of Endocannabinoids and Catabolic Enzyme Inhibitors	Leonard MZ, Alapafuja SO, Ji L, Shukla VG, Liu Y, Nikas SP, Makriyannis A, Bergman J, Kangas BD.	J Pharmacol Exp Ther. 2017 Dec;363(3):314-323. doi: 10.1124/jpet.117.244392. Epub 2017 Sep 25.	Leonard MZ	J Pharmacol Exp Ther	2017	2017-09-27	PMC5683067		10.1124/jpet.117.244392
28948486	Efficacy and Tolerability of Phytomedicines in Multiple Sclerosis Patients: A Review	Farzaei MH, Shahpiri Z, Bahramsoltani R, Nia MM, Najafi F, Rahimi R.	CNS Drugs. 2017 Oct;31(10):867-889. doi: 10.1007/s40263-017-0466-4.	Farzaei MH	CNS Drugs	2017	2017-09-27			10.1007/s40263-017-0466-4
28948698	Detection of in utero cannabis exposure by umbilical cord analysis	Kim J, de Castro A, Lendoiro E, Cruz-Landeira A, López-Rivadulla M, Concheiro M.	Drug Test Anal. 2018 Apr;10(4):636-643. doi: 10.1002/dta.2307. Epub 2017 Nov 13.	Kim J	Drug Test Anal	2018	2017-09-27			10.1002/dta.2307
28962885	Effects of glyphosate on immune responses and haemocyte DNA damage of Chinese mitten crab, Eriocheir sinensis	Hong Y, Yang X, Yan G, Huang Y, Zuo F, Shen Y, Ding Y, Cheng Y.	Fish Shellfish Immunol. 2017 Dec;71:19-27. doi: 10.1016/j.fsi.2017.09.062. Epub 2017 Sep 28.	Hong Y	Fish Shellfish Immunol	2017	2017-10-01			10.1016/j.fsi.2017.09.062
28967189	Pharmacokinetic properties of the synthetic cannabinoid JWH-018 in oral fluid after inhalation	Toennes SW, Geraths A, Pogoda W, Paulke A, Wunder C, Theunissen EL, Ramaekers JG.	Drug Test Anal. 2018 Apr;10(4):644-650. doi: 10.1002/dta.2310. Epub 2017 Nov 23.	Toennes SW	Drug Test Anal	2018	2017-10-03			10.1002/dta.2310
28967368	Is cannabis an effective treatment for joint pain?	Miller RJ, Miller RE.	Clin Exp Rheumatol. 2017 Sep-Oct;35 Suppl 107(5):59-67. Epub 2017 Sep 28.	Miller RJ	Clin Exp Rheumatol	2017	2017-10-03
28975374	Effects of L-arabinose efflux on λ Red recombination-mediated gene knockout in multiple-antimicrobial-resistant Salmonella enterica serovar Choleraesuis	Liao SW, Lee JJ, Ptak CP, Wu YC, Hsuan SL, Kuo CJ, Chen TH.	Arch Microbiol. 2018 Mar;200(2):219-225. doi: 10.1007/s00203-017-1436-4. Epub 2017 Oct 3.	Liao SW	Arch Microbiol	2018	2017-10-05			10.1007/s00203-017-1436-4
28976704	Human serum albumin: A modulator of cannabinoid drugs	Leboffe L, di Masi A, Trezza V, Polticelli F, Ascenzi P.	IUBMB Life. 2017 Nov;69(11):834-840. doi: 10.1002/iub.1682. Epub 2017 Oct 4.	Leboffe L	IUBMB Life	2017	2017-10-05			10.1002/iub.1682
28977394	Development of a Liquid Chromatography-Tandem Mass Spectrometry Method for the Simultaneous Determination of Four Cannabinoids in Umbilical Cord Tissue	Wu F, Scroggin TL, Metz TD, McMillin GA.	J Anal Toxicol. 2018 Jan 1;42(1):42-48. doi: 10.1093/jat/bkx078.	Wu F	J Anal Toxicol	2018	2017-10-05	PMC6392523		10.1093/jat/bkx078
28981118	Overactive type 2 cannabinoid receptor induces meiosis in fetal gonads and impairs ovarian reserve	De Domenico E, Todaro F, Rossi G, Dolci S, Geremia R, Rossi P, Grimaldi P.	Cell Death Dis. 2017 Oct 5;8(10):e3085. doi: 10.1038/cddis.2017.496.	De Domenico E	Cell Death Dis	2017	2017-10-06	PMC5682662		10.1038/cddis.2017.496
28983686	8β-OH-THC and 8β,11-diOH-THC-minor metabolites with major informative value?	Gasse A, Pfeiffer H, Köhler H, Schürenkamp J.	Int J Legal Med. 2018 Jan;132(1):157-164. doi: 10.1007/s00414-017-1692-5. Epub 2017 Oct 5.	Gasse A	Int J Legal Med	2018	2017-10-07			10.1007/s00414-017-1692-5
28987034	Impact of patient characteristics and treatment procedures on hospitalization cost and length of stay in Japanese patients with influenza: A structural equation modelling approach	Sruamsiri R, Ferchichi S, Jamotte A, Toumi M, Kubo H, Mahlich J.	Influenza Other Respir Viruses. 2017 Nov;11(6):543-555. doi: 10.1111/irv.12505. Epub 2017 Oct 27.	Sruamsiri R	Influenza Other Respir Viruses	2017	2017-10-08	PMC5705683		10.1111/irv.12505
28987305	Unintentional Marijuana Exposure Presenting as Altered Mental Status in the Pediatric Emergency Department: A Case Series	Thomas AA, Mazor S.	J Emerg Med. 2017 Dec;53(6):e119-e123. doi: 10.1016/j.jemermed.2017.08.007. Epub 2017 Oct 5.	Thomas AA	J Emerg Med	2017	2017-10-09			10.1016/j.jemermed.2017.08.007
29017688	Cannabinoids in Pain Management and Palliative Medicine	Häuser W, Fitzcharles MA, Radbruch L, Petzke F.	Dtsch Arztebl Int. 2017 Sep 22;114(38):627-634. doi: 10.3238/arztebl.2017.0627.	Häuser W	Dtsch Arztebl Int	2017	2017-10-12	PMC5645627		10.3238/arztebl.2017.0627
29020572	Variability in the primary emissions and secondary gas and particle formation from vehicles using bioethanol mixtures	Gramsch E, Papapostolou V, Reyes F, Vásquez Y, Castillo M, Oyola P, López G, Cádiz A, Ferguson S, Wolfson M, Lawrence J, Koutrakis P.	J Air Waste Manag Assoc. 2018 Apr;68(4):329-346. doi: 10.1080/10962247.2017.1386600.	Gramsch E	J Air Waste Manag Assoc	2018	2017-10-12			10.1080/10962247.2017.1386600
29023325	Performance and Health-Related Characteristics of Physically Active Males Using Marijuana	Lisano JK, Smith JD, Mathias AB, Christensen M, Smoak P, Phillips KT, Quinn CJ, Stewart LK.	J Strength Cond Res. 2019 Jun;33(6):1658-1668. doi: 10.1519/JSC.0000000000002238.	Lisano JK	J Strength Cond Res	2019	2017-10-13			10.1519/JSC.0000000000002238
29023392	Disposition, Metabolism and Histone Deacetylase and Acetyltransferase Inhibition Activity of Tetrahydrocurcumin and Other Curcuminoids	Novaes JT, Lillico R, Sayre CL, Nagabushnam K, Majeed M, Chen Y, Ho EA, Oliveira ALP, Martinez SE, Alrushaid S, Davies NM, Lakowski TM.	Pharmaceutics. 2017 Oct 12;9(4):45. doi: 10.3390/pharmaceutics9040045.	Novaes JT	Pharmaceutics	2017	2017-10-13	PMC5750651		10.3390/pharmaceutics9040045
29026060	Unmet needs in health training among nurses in rural Chinese township health centers: a cross-sectional hospital-based study	Mo Y, Hu G, Yi Y, Ying Y, Huang H, Huang Z, Lin J.	J Educ Eval Health Prof. 2017 Oct 4;14:22. doi: 10.3352/jeehp.2017.14.22. eCollection 2017.	Mo Y	J Educ Eval Health Prof	2017	2017-10-14	PMC5729214		10.3352/jeehp.2017.14.22
29032039	The efficacy of Poly-β-Hydroxy Butyrate (PHB)/biosurfactant derived from Staphylococcus hominis against White Spot Syndrome Virus (WSSV) in Penaeus monodon	Monica M, Priyanka T, Akshaya M, Rajeswari V, Sivakumar L, Somasundaram ST, Shenbhagarathai R.	Fish Shellfish Immunol. 2017 Dec;71:399-410. doi: 10.1016/j.fsi.2017.10.011. Epub 2017 Oct 12.	Monica M	Fish Shellfish Immunol	2017	2017-10-17			10.1016/j.fsi.2017.10.011
29039260	Medicinal cannabis (Bedrolite) substitution therapy in inpatients with a psychotic disorder and a comorbid cannabis use disorder: A case series	Schipper R, Dekker M, de Haan L, van den Brink W.	J Psychopharmacol. 2018 Mar;32(3):353-356. doi: 10.1177/0269881117735684. Epub 2017 Oct 17.	Schipper R	J Psychopharmacol	2018	2017-10-18			10.1177/0269881117735684
29043488	Hair analysis does not allow to discriminate between acute and chronic administrations of a drug in young children	Alvarez JC, Lasne L, Etting I, Chéron G, Abadie V, Fabresse N, Larabi IA.	Int J Legal Med. 2018 Jan;132(1):165-172. doi: 10.1007/s00414-017-1720-5. Epub 2017 Oct 18.	Alvarez JC	Int J Legal Med	2018	2017-10-19			10.1007/s00414-017-1720-5
29044958	A simple validated multi-analyte method for detecting drugs in oral fluid by ultra-performance liquid chromatography-tandem mass spectrometry (UPLC-MS/MS)	Zheng Y, Sparve E, Bergström M.	Drug Test Anal. 2018 Jun;10(6):1001-1008. doi: 10.1002/dta.2325. Epub 2017 Dec 18.	Zheng Y	Drug Test Anal	2018	2017-10-19			10.1002/dta.2325
29045302	Neurosteroid Levels in Patients With Bipolar Disorder and a History of Cannabis Use Disorders	Mason BL, Van Enkevort E, Filbey F, Marx CE, Park J, Nakamura A, Sunderajan P, Brown ES.	J Clin Psychopharmacol. 2017 Dec;37(6):684-688. doi: 10.1097/JCP.0000000000000793.	Mason BL	J Clin Psychopharmacol	2017	2017-10-19			10.1097/JCP.0000000000000793
29048189	Sex-related marijuana expectancies as predictors of sexual risk behavior following smoked marijuana challenge	Skalski LM, Gunn RL, Caswell A, Maisto S, Metrik J.	Exp Clin Psychopharmacol. 2017 Oct;25(5):402-411. doi: 10.1037/pha0000138.	Skalski LM	Exp Clin Psychopharmacol	2017	2017-10-20	PMC5657572	NIHMS886812	10.1037/pha0000138
29052091	THC/CBD oromucosal spray in patients with multiple sclerosis overactive bladder: a pilot prospective study	Maniscalco GT, Aponte R, Bruzzese D, Guarcello G, Manzo V, Napolitano M, Moreggia O, Chiariello F, Florio C.	Neurol Sci. 2018 Jan;39(1):97-102. doi: 10.1007/s10072-017-3148-6. Epub 2017 Oct 19.	Maniscalco GT	Neurol Sci	2018	2017-10-21			10.1007/s10072-017-3148-6
29057480	Cannabinoids concentration variability in cannabis olive oil galenic preparations	Carcieri C, Tomasello C, Simiele M, De Nicolò A, Avataneo V, Canzoneri L, Cusato J, Di Perri G, D'Avolio A.	J Pharm Pharmacol. 2018 Jan;70(1):143-149. doi: 10.1111/jphp.12845. Epub 2017 Oct 23.	Carcieri C	J Pharm Pharmacol	2018	2017-10-24			10.1111/jphp.12845
29057576	System-specific activity in response to Δ(9) -tetrahydrocannabinol: a functional magnetic resonance imaging study in awake male rats	Madularu D, Yee JR, Kulkarni P, Ferris CF.	Eur J Neurosci. 2017 Dec;46(12):2893-2900. doi: 10.1111/ejn.13754. Epub 2017 Nov 6.	Madularu D	Eur J Neurosci	2017	2017-10-24			10.1111/ejn.13754
29061566	Thyroid Function Within the Normal Range, Subclinical Hypothyroidism, and the Risk of Atrial Fibrillation	Baumgartner C, da Costa BR, Collet TH, Feller M, Floriani C, Bauer DC, Cappola AR, Heckbert SR, Ceresini G, Gussekloo J, den Elzen WPJ, Peeters RP, Luben R, Völzke H, Dörr M, Walsh JP, Bremner A, Iacoviello M, Macfarlane P, Heeringa J, Stott DJ, Westendorp RGJ, Khaw KT, Magnani JW, Aujesky D, Rodondi N; Thyroid Studies Collaboration.	Circulation. 2017 Nov 28;136(22):2100-2116. doi: 10.1161/CIRCULATIONAHA.117.028753. Epub 2017 Oct 23.	Baumgartner C	Circulation	2017	2017-10-25	PMC5705446	NIHMS907107	10.1161/CIRCULATIONAHA.117.028753
29064160	Marijuana commercialization and adolescent substance treatment outcomes in Colorado	LeNoue SR, Salomonsen-Sautel S, Min SJ, Thurstone C.	Am J Addict. 2017 Dec;26(8):802-806. doi: 10.1111/ajad.12634. Epub 2017 Oct 24.	LeNoue SR	Am J Addict	2017	2017-10-25			10.1111/ajad.12634
29064482	Development of a total hydrocarbon ordinal job-exposure matrix for workers responding to the Deepwater Horizon disaster: The GuLF STUDY	Stewart PA, Stenzel MR, Ramachandran G, Banerjee S, Huynh TB, Groth CP, Kwok RK, Blair A, Engel LS, Sandler DP.	J Expo Sci Environ Epidemiol. 2018 May;28(3):223-230. doi: 10.1038/jes.2017.16. Epub 2017 Oct 18.	Stewart PA	J Expo Sci Environ Epidemiol	2018	2017-10-25	PMC6104396	NIHMS967087	10.1038/jes.2017.16
29066964	Using Functional Near-Infrared Spectroscopy to Measure Effects of Delta 9-Tetrahydrocannabinol on Prefrontal Activity and Working Memory in Cannabis Users	Keles HO, Radoman M, Pachas GN, Evins AE, Gilman JM.	Front Hum Neurosci. 2017 Oct 10;11:488. doi: 10.3389/fnhum.2017.00488. eCollection 2017.	Keles HO	Front Hum Neurosci	2017	2017-10-26	PMC5641318		10.3389/fnhum.2017.00488
29070078	Prevalence of prenatal exposure to substances of abuse: questionnaire versus biomarkers	Chiandetti A, Hernandez G, Mercadal-Hally M, Alvarez A, Andreu-Fernandez V, Navarro-Tapia E, Bastons-Compta A, Garcia-Algar O.	Reprod Health. 2017 Oct 25;14(1):137. doi: 10.1186/s12978-017-0385-3.	Chiandetti A	Reprod Health	2017	2017-10-27	PMC5657059		10.1186/s12978-017-0385-3
29072187	Substance abuse and cancer	Moussas GI, Papadopoulou AG.	Psychiatriki. 2017 Jul-Sep;28(3):234-241. doi: 10.22365/jpsych.2017.283.234.	Moussas GI	Psychiatriki	2017	2017-10-27			10.22365/jpsych.2017.283.234
29072720	Cannabis through the looking glass: chemo- and enantio-selective separation of phytocannabinoids by enantioselective ultra high performance supercritical fluid chromatography	Mazzoccanti G, Ismail OH, D'Acquarica I, Villani C, Manzo C, Wilcox M, Cavazzini A, Gasparrini F.	Chem Commun (Camb). 2017 Nov 14;53(91):12262-12265. doi: 10.1039/c7cc06999e.	Mazzoccanti G	Chem Commun (Camb)	2017	2017-10-27			10.1039/c7cc06999e
29082317	Cannabinoid Receptor 1 Gene by Cannabis Use Interaction on CB1 Receptor Density	Ketcherside A, Noble LJ, McIntyre CK, Filbey FM.	Cannabis Cannabinoid Res. 2017 Aug 1;2(1):202-209. doi: 10.1089/can.2017.0007. eCollection 2017.	Ketcherside A	Cannabis Cannabinoid Res	2017	2017-10-31	PMC5628563		10.1089/can.2017.0007
29082318	Cannabis Roots: A Traditional Therapy with Future Potential for Treating Inflammation and Pain	Ryz NR, Remillard DJ, Russo EB.	Cannabis Cannabinoid Res. 2017 Aug 1;2(1):210-216. doi: 10.1089/can.2017.0028. eCollection 2017.	Ryz NR	Cannabis Cannabinoid Res	2017	2017-10-31	PMC5628559		10.1089/can.2017.0028
29082320	Δ(9)-Tetrahydrocannabinol Experience Influences ΔFosB and Downstream Gene Expression in Prefrontal Cortex	Lazenka MF, Kang M, De DD, Selley DE, Sim-Selley LJ.	Cannabis Cannabinoid Res. 2017 Aug 1;2(1):224-234. doi: 10.1089/can.2017.0022. eCollection 2017.	Lazenka MF	Cannabis Cannabinoid Res	2017	2017-10-31	PMC5628572		10.1089/can.2017.0022
29082802	Drug-drug interactions as a result of co-administering Δ(9)-THC and CBD with other psychotropic agents	Rong C, Carmona NE, Lee YL, Ragguett RM, Pan Z, Rosenblat JD, Subramaniapillai M, Shekotikhina M, Almatham F, Alageel A, Mansur R, Ho RC, McIntyre RS.	Expert Opin Drug Saf. 2018 Jan;17(1):51-54. doi: 10.1080/14740338.2017.1397128. Epub 2017 Oct 31.	Rong C	Expert Opin Drug Saf	2018	2017-10-31			10.1080/14740338.2017.1397128
29083450	The Potential of Cannabidiol Treatment for Cannabis Users With Recent-Onset Psychosis	Hahn B.	Schizophr Bull. 2018 Jan 13;44(1):46-53. doi: 10.1093/schbul/sbx105.	Hahn B	Schizophr Bull	2018	2017-10-31	PMC5768049		10.1093/schbul/sbx105
29089454	Cerebral Near-Infrared Spectroscopy: A Potential Approach for Thrombectomy Monitoring	Ritzenthaler T, Cho TH, Mechtouff L, Ong E, Turjman F, Robinson P, Berthezène Y, Nighoghossian N.	Stroke. 2017 Dec;48(12):3390-3392. doi: 10.1161/STROKEAHA.117.019176. Epub 2017 Oct 31.	Ritzenthaler T	Stroke	2017	2017-11-02			10.1161/STROKEAHA.117.019176
29094798	Determination of cannabinoids from a surrogate hops matrix using multiple reaction monitoring gas chromatography with triple quadrupole mass spectrometry	Leghissa A, Hildenbrand ZL, Foss FW, Schug KA.	J Sep Sci. 2018 Jan;41(2):459-468. doi: 10.1002/jssc.201700946. Epub 2017 Dec 1.	Leghissa A	J Sep Sci	2018	2017-11-03			10.1002/jssc.201700946
29096701	Assessment of utilization pattern of fixed dose drug combinations in primary, secondary and tertiary healthcare centers in Nepal: a cross-sectional study	Poudel A, Mohamed Ibrahim MI, Mishra P, Palaian S.	BMC Pharmacol Toxicol. 2017 Nov 2;18(1):69. doi: 10.1186/s40360-017-0176-z.	Poudel A	BMC Pharmacol Toxicol	2017	2017-11-04	PMC5667497		10.1186/s40360-017-0176-z
29098186	Chronic Adolescent Δ(9)-Tetrahydrocannabinol Treatment of Male Mice Leads to Long-Term Cognitive and Behavioral Dysfunction, Which Are Prevented by Concurrent Cannabidiol Treatment	Murphy M, Mills S, Winstone J, Leishman E, Wager-Miller J, Bradshaw H, Mackie K.	Cannabis Cannabinoid Res. 2017 Sep 1;2(1):235-246. doi: 10.1089/can.2017.0034. eCollection 2017.	Murphy M	Cannabis Cannabinoid Res	2017	2017-11-04	PMC5655843		10.1089/can.2017.0034
29098190	Cannabis sativa (Hemp) Seeds, Δ(9)-Tetrahydrocannabinol, and Potential Overdose	Yang Y, Lewis MM, Bello AM, Wasilewski E, Clarke HA, Kotra LP.	Cannabis Cannabinoid Res. 2017 Oct 1;2(1):274-281. doi: 10.1089/can.2017.0040. eCollection 2017.	Yang Y	Cannabis Cannabinoid Res	2017	2017-11-04	PMC5665515		10.1089/can.2017.0040
29099795	Microwave-Assisted Extraction of Cannabinoids in Hemp Nut Using Response Surface Methodology: Optimization and Comparative Study	Chang CW, Yen CC, Wu MT, Hsu MC, Wu YT.	Molecules. 2017 Nov 3;22(11):1894. doi: 10.3390/molecules22111894.	Chang CW	Molecules	2017	2017-11-04	PMC6150297		10.3390/molecules22111894
29101333	Acute induction of anxiety in humans by delta-9-tetrahydrocannabinol related to amygdalar cannabinoid-1 (CB1) receptors	Bhattacharyya S, Egerton A, Kim E, Rosso L, Riano Barros D, Hammers A, Brammer M, Turkheimer FE, Howes OD, McGuire P.	Sci Rep. 2017 Nov 3;7(1):15025. doi: 10.1038/s41598-017-14203-4.	Bhattacharyya S	Sci Rep	2017	2017-11-05	PMC5670208		10.1038/s41598-017-14203-4
29102183	The impact of the 2016 Fort McMurray Horse River Wildfire on ambient air pollution levels in the Athabasca Oil Sands Region, Alberta, Canada	Landis MS, Edgerton ES, White EM, Wentworth GR, Sullivan AP, Dillner AM.	Sci Total Environ. 2018 Mar 15;618:1665-1676. doi: 10.1016/j.scitotenv.2017.10.008. Epub 2017 Nov 4.	Landis MS	Sci Total Environ	2018	2017-11-06	PMC6084447	NIHMS983401	10.1016/j.scitotenv.2017.10.008
29103798	Cannabis Intoxication Case Series: The Dangers of Edibles Containing Tetrahydrocannabinol	Vo KT, Horng H, Li K, Ho RY, Wu AHB, Lynch KL, Smollin CG.	Ann Emerg Med. 2018 Mar;71(3):306-313. doi: 10.1016/j.annemergmed.2017.09.008. Epub 2017 Nov 3.	Vo KT	Ann Emerg Med	2018	2017-11-07			10.1016/j.annemergmed.2017.09.008
29105041	The crop-residue of fiber hemp cv. Futura 75: from a waste product to a source of botanical insecticides	Benelli G, Pavela R, Lupidi G, Nabissi M, Petrelli R, Ngahang Kamte SL, Cappellacci L, Fiorini D, Sut S, Dall'Acqua S, Maggi F.	Environ Sci Pollut Res Int. 2018 Apr;25(11):10515-10525. doi: 10.1007/s11356-017-0635-5. Epub 2017 Nov 6.	Benelli G	Environ Sci Pollut Res Int	2018	2017-11-07			10.1007/s11356-017-0635-5
29106691	Developmental Effects of Cannabidiol and Δ9-Tetrahydrocannabinol in Zebrafish	Carty DR, Thornton C, Gledhill JH, Willett KL.	Toxicol Sci. 2018 Mar 1;162(1):137-145. doi: 10.1093/toxsci/kfx232.	Carty DR	Toxicol Sci	2018	2017-11-07	PMC6257009		10.1093/toxsci/kfx232
29107185	Reversal of age-related cognitive impairments in mice by an extremely low dose of tetrahydrocannabinol	Sarne Y, Toledano R, Rachmany L, Sasson E, Doron R.	Neurobiol Aging. 2018 Jan;61:177-186. doi: 10.1016/j.neurobiolaging.2017.09.025. Epub 2017 Oct 6.	Sarne Y	Neurobiol Aging	2018	2017-11-07			10.1016/j.neurobiolaging.2017.09.025
29107728	Acute and long-term effects of Δ9-tetrahydrocannabinol on object recognition and anxiety-like activity are age- and strain-dependent in mice	Kasten CR, Zhang Y, Boehm SL 2nd.	Pharmacol Biochem Behav. 2017 Dec;163:9-19. doi: 10.1016/j.pbb.2017.10.012. Epub 2017 Oct 28.	Kasten CR	Pharmacol Biochem Behav	2017	2017-11-07	PMC5690484	NIHMS918197	10.1016/j.pbb.2017.10.012
29109461	Oral administration of cannabis with lipids leads to high levels of cannabinoids in the intestinal lymphatic system and prominent immunomodulation	Zgair A, Lee JB, Wong JCM, Taha DA, Aram J, Di Virgilio D, McArthur JW, Cheng YK, Hennig IM, Barrett DA, Fischer PM, Constantinescu CS, Gershkovich P.	Sci Rep. 2017 Nov 6;7(1):14542. doi: 10.1038/s41598-017-15026-z.	Zgair A	Sci Rep	2017	2017-11-08	PMC5674070		10.1038/s41598-017-15026-z
29111112	Anti-migraine effect of ∆(9)-tetrahydrocannabinol in the female rat	Kandasamy R, Dawson CT, Craft RM, Morgan MM.	Eur J Pharmacol. 2018 Jan 5;818:271-277. doi: 10.1016/j.ejphar.2017.10.054. Epub 2017 Oct 28.	Kandasamy R	Eur J Pharmacol	2018	2017-11-08	PMC5742305	NIHMS917758	10.1016/j.ejphar.2017.10.054
29112827	Incremental validity of estimated cannabis grams as a predictor of problems and cannabinoid biomarkers: Evidence from a clinical trial	Tomko RL, Baker NL, McClure EA, Sonne SC, McRae-Clark AL, Sherman BJ, Gray KM.	Drug Alcohol Depend. 2018 Jan 1;182:1-7. doi: 10.1016/j.drugalcdep.2017.09.035. Epub 2017 Nov 2.	Tomko RL	Drug Alcohol Depend	2018	2017-11-08	PMC5742553	NIHMS918768	10.1016/j.drugalcdep.2017.09.035
29123387	Longitudinal change of COPD assessment test (CAT) in a telehealthcare cohort is associated with exacerbation risk	Rassouli F, Baty F, Stolz D, Albrich WC, Tamm M, Widmer S, Brutsche MH.	Int J Chron Obstruct Pulmon Dis. 2017 Oct 24;12:3103-3109. doi: 10.2147/COPD.S141646. eCollection 2017.	Rassouli F	Int J Chron Obstruct Pulmon Dis	2017	2017-11-11	PMC5661474		10.2147/COPD.S141646
29125965	Death by self-mutilation after oral cannabis consumption	Delteil C, Sastre C, Piercecchi MD, Faget-Agius C, Deveaux M, Kintz P, Devooght MA, Leonetti G, Bartoli C, Pélissier-Alicot AL.	Leg Med (Tokyo). 2018 Jan;30:5-9. doi: 10.1016/j.legalmed.2017.10.010. Epub 2017 Nov 2.	Delteil C	Leg Med (Tokyo)	2018	2017-11-11			10.1016/j.legalmed.2017.10.010
29126098	Hair: A bio-marker for detection of drugs of abuse	Khajuria H, Nayak BP.	Asian J Psychiatr. 2017 Dec;30:208-209. doi: 10.1016/j.ajp.2017.10.017. Epub 2017 Nov 8.	Khajuria H	Asian J Psychiatr	2017	2017-11-11			10.1016/j.ajp.2017.10.017
29126183	Up in Smoke: Uncovering a Lack of Evidence for Proton Pump Inhibitors as a Source of Tetrahydrocannabinol Immunoassay False Positives	Powers JL, Rasmussen NN, Hurst D, Strathmann FG.	Pain Med. 2018 Nov 1;19(11):2196-2200. doi: 10.1093/pm/pnx266.	Powers JL	Pain Med	2018	2017-11-11			10.1093/pm/pnx266
29127030	Hybridization improved bacteria resistance in abalone: Evidence from physiological and molecular responses	Liang S, Luo X, You W, Ke C.	Fish Shellfish Immunol. 2018 Jan;72:679-689. doi: 10.1016/j.fsi.2017.11.009. Epub 2017 Nov 7.	Liang S	Fish Shellfish Immunol	2018	2017-11-12			10.1016/j.fsi.2017.11.009
29128791	ACPA and JWH-133 modulate the vascular tone of superior mesenteric arteries through cannabinoid receptors, BK(Ca) channels, and nitric oxide dependent mechanisms	López-Dyck E, Andrade-Urzúa F, Elizalde A, Ferrer-Villada T, Dagnino-Acosta A, Huerta M, Osuna-Calleros Z, Rangel-Sandoval C, Sánchez-Pastor E.	Pharmacol Rep. 2017 Dec;69(6):1131-1139. doi: 10.1016/j.pharep.2017.06.011. Epub 2017 Jul 1.	López-Dyck E	Pharmacol Rep	2017	2017-11-13			10.1016/j.pharep.2017.06.011
29129557	Pharmacokinetic and behavioural profile of THC, CBD, and THC+CBD combination after pulmonary, oral, and subcutaneous administration in rats and confirmation of conversion in vivo of CBD to THC	Hložek T, Uttl L, Kadeřábek L, Balíková M, Lhotková E, Horsley RR, Nováková P, Šíchová K, Štefková K, Tylš F, Kuchař M, Páleníček T.	Eur Neuropsychopharmacol. 2017 Dec;27(12):1223-1237. doi: 10.1016/j.euroneuro.2017.10.037. Epub 2017 Nov 10.	Hložek T	Eur Neuropsychopharmacol	2017	2017-11-14			10.1016/j.euroneuro.2017.10.037
29133063	Octopamine enhances the immune responses of freshwater giant prawn, Macrobrachium rosenbergii, via octopamine receptors	Kuo HW, Cheng W.	Dev Comp Immunol. 2018 Apr;81:19-32. doi: 10.1016/j.dci.2017.11.002. Epub 2017 Nov 10.	Kuo HW	Dev Comp Immunol	2018	2017-11-15			10.1016/j.dci.2017.11.002
29135039	A novel fast method for aqueous derivatization of THC, OH-THC and THC-COOH in human whole blood and urine samples for routine forensic analyses	Stefanelli F, Pesci FG, Giusiani M, Chericoni S.	Biomed Chromatogr. 2018 Apr;32(4). doi: 10.1002/bmc.4136. Epub 2018 Jan 3.	Stefanelli F	Biomed Chromatogr	2018	2017-11-15			10.1002/bmc.4136
29143586	Break-out session highlights	Myhr KM, Mäurer M, Ginés MM, Esposito F, Linker R.	Neurodegener Dis Manag. 2017 Nov;7(6s):45-49. doi: 10.2217/nmt-2017-0042.	Myhr KM	Neurodegener Dis Manag	2017	2017-11-17			10.2217/nmt-2017-0042
29143802	The Inhibitory Effects of Cobalt Protoporphyrin IX and Cannabinoid 2 Receptor Agonists in Type 2 Diabetic Mice	McDonnell C, Leánez S, Pol O.	Int J Mol Sci. 2017 Oct 28;18(11):2268. doi: 10.3390/ijms18112268.	McDonnell C	Int J Mol Sci	2017	2017-11-17	PMC5713238		10.3390/ijms18112268
29145345	The role of Sativex in robotic rehabilitation in individuals with multiple sclerosis: Rationale, study design, and methodology	Russo M, Dattola V, Logiudice AL, Ciurleo R, Sessa E, De Luca R, Bramanti P, Bramanti A, Naro A, Calabrò RS.	Medicine (Baltimore). 2017 Nov;96(46):e8826. doi: 10.1097/MD.0000000000008826.	Russo M	Medicine (Baltimore)	2017	2017-11-18	PMC5704890		10.1097/MD.0000000000008826
29146453	Cellular and biochemical parameters following autotomy and ablation-mediated cheliped loss in the Chinese mitten crab, Eriocheir sinensis	Yang XZ, Zhang C, Huang GY, Xu MJ, Cheng YX, Yang ZG, Zhang Q, Wang YY.	Dev Comp Immunol. 2018 Apr;81:33-43. doi: 10.1016/j.dci.2017.11.003. Epub 2017 Nov 13.	Yang XZ	Dev Comp Immunol	2018	2017-11-18			10.1016/j.dci.2017.11.003
29152433	To Dab or Not to Dab: Rising Concerns Regarding the Toxicity of Cannabis Concentrates	Alzghari SK, Fung V, Rickner SS, Chacko L, Fleming SW.	Cureus. 2017 Sep 11;9(9):e1676. doi: 10.7759/cureus.1676.	Alzghari SK	Cureus	2017	2017-11-21	PMC5679763		10.7759/cureus.1676
29153148	The Case | Weeding out the cause of acute kidney injury	Rajkumar T, Chacko B.	Kidney Int. 2017 Dec;92(6):1561-1562. doi: 10.1016/j.kint.2017.06.010.	Rajkumar T	Kidney Int	2017	2017-11-21			10.1016/j.kint.2017.06.010
29158718	Effects of chronic Δ(9)-tetrahydrocannabinol treatment on Rho/Rho-kinase signalization pathway in mouse brain	Kaplan HM, Pazarci P.	Saudi Pharm J. 2017 Nov;25(7):1078-1081. doi: 10.1016/j.jsps.2017.05.002. Epub 2017 May 11.	Kaplan HM	Saudi Pharm J	2017	2017-11-22	PMC5681306		10.1016/j.jsps.2017.05.002
29161601	Characterizing emission rates of regulated pollutants from model year 2012+ heavy-duty diesel vehicles equipped with DPF and SCR systems	Jiang Y, Yang J, Cocker D 3rd, Karavalakis G, Johnson KC, Durbin TD.	Sci Total Environ. 2018 Apr 1;619-620:765-771. doi: 10.1016/j.scitotenv.2017.11.120. Epub 2017 Nov 29.	Jiang Y	Sci Total Environ	2018	2017-11-22			10.1016/j.scitotenv.2017.11.120
29161743	Pharmacological Foundations of Cannabis Chemovars	Lewis MA, Russo EB, Smith KM.	Planta Med. 2018 Mar;84(4):225-233. doi: 10.1055/s-0043-122240. Epub 2017 Nov 21.	Lewis MA	Planta Med	2018	2017-11-22			10.1055/s-0043-122240
29170454	CB(2) receptor activation causes an ERK1/2-dependent inflammatory response in human RPE cells	Hytti M, Andjelic S, Josifovska N, Piippo N, Korhonen E, Hawlina M, Kaarniranta K, Nevalainen TJ, Petrovski G, Parkkari T, Kauppinen A.	Sci Rep. 2017 Nov 23;7(1):16169. doi: 10.1038/s41598-017-16524-w.	Hytti M	Sci Rep	2017	2017-11-25	PMC5701010		10.1038/s41598-017-16524-w
29173160	Simple and Fast Gas-chromatography Mass Spectrometry Assay to Assess Delta 9-Tetrahydrocannabinol and Cannabidiol in Dogs Treated with Medical Cannabis for Canine Epilepsy	Rotolo MC, Graziano S, Pellegrini M, Corlazzoli D, Antinori L, Porcarelli L, Pichini S.	Curr Pharm Biotechnol. 2017;18(10):821-827. doi: 10.2174/1389201018666171122115815.	Rotolo MC	Curr Pharm Biotechnol	2017	2017-11-28			10.2174/1389201018666171122115815
29175630	Predicting Treatment Response of Breast Cancer to Neoadjuvant Chemotherapy Using Ultrasound-Guided Diffuse Optical Tomography	Zhi W, Liu G, Chang C, Miao A, Zhu X, Xie L, Zhou J.	Transl Oncol. 2018 Feb;11(1):56-64. doi: 10.1016/j.tranon.2017.10.011. Epub 2017 Nov 22.	Zhi W	Transl Oncol	2018	2017-11-28	PMC5714257		10.1016/j.tranon.2017.10.011
29178372	THC alters alters morphology of neurons in medial prefrontal cortex, orbital prefrontal cortex, and nucleus accumbens and alters the ability of later experience to promote structural plasticity	Kolb B, Li Y, Robinson T, Parker LA.	Synapse. 2018 Mar;72(3). doi: 10.1002/syn.22020. Epub 2017 Dec 7.	Kolb B	Synapse	2018	2017-11-28			10.1002/syn.22020
29178487	Therapeutic Benefit of Smoked Cannabis in Randomized Placebo-Controlled Studies	Bowen LL, McRae-Clark AL.	Pharmacotherapy. 2018 Jan;38(1):80-85. doi: 10.1002/phar.2064. Epub 2017 Dec 18.	Bowen LL	Pharmacotherapy	2018	2017-11-28	PMC5766362	NIHMS922768	10.1002/phar.2064
29181404	Δ(9)-Tetrahydrocannabinol Prevents Cardiovascular Dysfunction in STZ-Diabetic Wistar-Kyoto Rats	Vella RK, Jackson DJ, Fenning AS.	Biomed Res Int. 2017;2017:7974149. doi: 10.1155/2017/7974149. Epub 2017 Oct 18.	Vella RK	Biomed Res Int	2017	2017-11-29	PMC5664274		10.1155/2017/7974149
29182999	Analysis of cannabinoids in commercial hemp seed oil and decarboxylation kinetics studies of cannabidiolic acid (CBDA)	Citti C, Pacchetti B, Vandelli MA, Forni F, Cannazza G.	J Pharm Biomed Anal. 2018 Feb 5;149:532-540. doi: 10.1016/j.jpba.2017.11.044. Epub 2017 Nov 20.	Citti C	J Pharm Biomed Anal	2018	2017-11-29			10.1016/j.jpba.2017.11.044
29186023	Highly Sensitive FPW-Based Microsystem for Rapid Detection of Tetrahydrocannabinol in Human Urine	Lan JW, Hsieh CH, Huang IY, Lin YC, Tsai TY, Wang CC.	Sensors (Basel). 2017 Nov 29;17(12):2760. doi: 10.3390/s17122760.	Lan JW	Sensors (Basel)	2017	2017-11-30	PMC5750750		10.3390/s17122760
29189142	Interpretation of Cannabis Findings in the Hair of Very Young Children: Mission Impossible	Kintz P, Ameline A, Eibel A, Gheddar L, Feisthauer E, Geraut A, Berthelon L, Farrugia A, Raul JS.	Curr Pharm Biotechnol. 2017;18(10):791-795. doi: 10.2174/1389201019666171129180206.	Kintz P	Curr Pharm Biotechnol	2017	2017-12-01			10.2174/1389201019666171129180206
29189144	Therapeutic Use of Δ9-THC and Cannabidiol: Evaluation of a New Extraction Procedure for the Preparation of Cannabis-based Olive Oil	Morini L, Porro G, Liso M, Groppi A.	Curr Pharm Biotechnol. 2017;18(10):828-833. doi: 10.2174/1389201019666171129175655.	Morini L	Curr Pharm Biotechnol	2017	2017-12-01			10.2174/1389201019666171129175655
29191629	Effects of Δ(9)-tetrahydrocannabinol (THC) on human amniotic epithelial cell proliferation and migration	Yao JL, He QZ, Liu M, Chang XW, Wu JT, Duan T, Wang K.	Toxicology. 2018 Feb 1;394:19-26. doi: 10.1016/j.tox.2017.11.016. Epub 2017 Nov 27.	Yao JL	Toxicology	2018	2017-12-02			10.1016/j.tox.2017.11.016
29192095	Health effects of exposure to second- and third-hand marijuana smoke: a systematic review	Holitzki H, Dowsett LE, Spackman E, Noseworthy T, Clement F.	CMAJ Open. 2017 Nov 24;5(4):E814-E822. doi: 10.9778/cmajo.20170112.	Holitzki H	CMAJ Open	2017	2017-12-02	PMC5741419		10.9778/cmajo.20170112
29193383	Blood transfusion is a critical determinant of resource utilization and total hospital cost in liver transplantation	Ruiz J, Dugan A, Davenport DL, Gedaly R.	Clin Transplant. 2018 Feb;32(2). doi: 10.1111/ctr.13164. Epub 2018 Jan 29.	Ruiz J	Clin Transplant	2018	2017-12-02			10.1111/ctr.13164
29194121	HIV-infected cannabis users have lower circulating CD16+ monocytes and IFN-γ-inducible protein 10 levels compared with nonusing HIV patients	Rizzo MD, Crawford RB, Henriquez JE, Aldhamen YA, Gulick P, Amalfitano A, Kaminski NE.	AIDS. 2018 Feb 20;32(4):419-429. doi: 10.1097/QAD.0000000000001704.	Rizzo MD	AIDS	2018	2017-12-02	PMC5790621	NIHMS924058	10.1097/QAD.0000000000001704
29194220	An (Un)Fortune Cookie: A 2-Year-Old With Altered Mental Status	Friedman N, Gantz J, Finkelstein Y.	Pediatr Emerg Care. 2017 Dec;33(12):811-814. doi: 10.1097/PEC.0000000000001336.	Friedman N	Pediatr Emerg Care	2017	2017-12-02			10.1097/PEC.0000000000001336
29197242	Alcohol and illicit drugs in drivers involved in road traffic crashes in the Milan area. A comparison with normal traffic reveals the possible inadequacy of current cut-off limits	Ferrari D, Manca M, Banfi G, Locatelli M.	Forensic Sci Int. 2018 Jan;282:127-132. doi: 10.1016/j.forsciint.2017.11.005. Epub 2017 Nov 22.	Ferrari D	Forensic Sci Int	2018	2017-12-03			10.1016/j.forsciint.2017.11.005
29198777	The cyclin-dependent kinase 2 (CDK2) mediates hematopoiesis through G1-to-S transition in Chinese mitten crab Eriocheir sinensis	Yang B, Jia Y, Jia Z, Wang W, Song X, Li Y, Yi Q, Wang L, Song L.	Dev Comp Immunol. 2018 Apr;81:156-166. doi: 10.1016/j.dci.2017.11.022. Epub 2017 Dec 2.	Yang B	Dev Comp Immunol	2018	2017-12-05			10.1016/j.dci.2017.11.022
29202305	Development of a simple and sensitive liquid chromatography triple quadrupole mass spectrometry (LC-MS/MS) method for the determination of cannabidiol (CBD), Δ(9)-tetrahydrocannabinol (THC) and its metabolites in rat whole blood after oral administration of a single high dose of CBD	Palazzoli F, Citti C, Licata M, Vilella A, Manca L, Zoli M, Vandelli MA, Forni F, Cannazza G.	J Pharm Biomed Anal. 2018 Feb 20;150:25-32. doi: 10.1016/j.jpba.2017.11.054. Epub 2017 Nov 28.	Palazzoli F	J Pharm Biomed Anal	2018	2017-12-05			10.1016/j.jpba.2017.11.054
29203575	Chronic Δ(9)-THC in Rhesus Monkeys: Effects on Cognitive Performance and Dopamine D2/D3 Receptor Availability	John WS, Martin TJ, Solingapuram Sai KK, Nader SH, Gage HD, Mintz A, Nader MA.	J Pharmacol Exp Ther. 2018 Feb;364(2):300-310. doi: 10.1124/jpet.117.244194. Epub 2017 Dec 4.	John WS	J Pharmacol Exp Ther	2018	2017-12-06	PMC5774214		10.1124/jpet.117.244194
29208496	Effect of stocking density on growth performance, digestive enzyme activities, and nonspecific immune parameters of Palaemonetes sinensis	Dong J, Zhao YY, Yu YH, Sun N, Li YD, Wei H, Yang ZQ, Li XD, Li L.	Fish Shellfish Immunol. 2018 Feb;73:37-41. doi: 10.1016/j.fsi.2017.12.006. Epub 2017 Dec 5.	Dong J	Fish Shellfish Immunol	2018	2017-12-07			10.1016/j.fsi.2017.12.006
29231136	Stability of Drugs of Abuse in Urine Samples at Room Temperature by Use of a Salts Mixture	Pellegrini M, Graziano S, Mastrobattista L, Minutillo A, Busardo FP, Scarsella G.	Curr Pharm Biotechnol. 2017;18(10):815-820. doi: 10.2174/1389201019666171211155043.	Pellegrini M	Curr Pharm Biotechnol	2017	2017-12-13			10.2174/1389201019666171211155043
29232588	Bioactive products from singlet oxygen photooxygenation of cannabinoids	Galal Osman A, Elokely KM, Yadav VK, Carvalho P, Radwan M, Slade D, Gul W, Khan S, Dale OR, Husni AS, Klein ML, Cutler SJ, Ross SA, ElSohly MA.	Eur J Med Chem. 2018 Jan 1;143:983-996. doi: 10.1016/j.ejmech.2017.11.043. Epub 2017 Nov 21.	Galal Osman A	Eur J Med Chem	2018	2017-12-13			10.1016/j.ejmech.2017.11.043
29237190	Determination of Acid and Neutral Cannabinoids in Extracts of Different Strains of Cannabis sativa Using GC-FID	Ibrahim EA, Gul W, Gul SW, Stamper BJ, Hadad GM, Abdel Salam RA, Ibrahim AK, Ahmed SA, Chandra S, Lata H, Radwan MM, ElSohly MA.	Planta Med. 2018 Mar;84(4):250-259. doi: 10.1055/s-0043-124088. Epub 2017 Dec 13.	Ibrahim EA	Planta Med	2018	2017-12-14			10.1055/s-0043-124088
29244944	Evaluating the Performance of Household Liquefied Petroleum Gas Cookstoves	Shen G, Hays MD, Smith KR, Williams C, Faircloth JW, Jetter JJ.	Environ Sci Technol. 2018 Jan 16;52(2):904-915. doi: 10.1021/acs.est.7b05155. Epub 2018 Jan 2.	Shen G	Environ Sci Technol	2018	2017-12-16	PMC7362386	NIHMS1586358	10.1021/acs.est.7b05155
29253647	Metabolomic profiling for outcome prediction in emergency department patients with out-of-hospital cardiac arrest	Tsai CL, Tsai MS, Kuo CH, Chou TH, Chen WJ, Huang CH.	Resuscitation. 2018 Feb;123:e1-e2. doi: 10.1016/j.resuscitation.2017.12.016. Epub 2017 Dec 15.	Tsai CL	Resuscitation	2018	2017-12-19			10.1016/j.resuscitation.2017.12.016
29262425	Quantitative Determination of Δ9-THC, CBG, CBD, Their Acid Precursors and Five Other Neutral Cannabinoids by UHPLC-UV-MS	Wang YH, Avula B, ElSohly MA, Radwan MM, Wang M, Wanas AS, Mehmedic Z, Khan IA.	Planta Med. 2018 Mar;84(4):260-266. doi: 10.1055/s-0043-124873. Epub 2017 Dec 20.	Wang YH	Planta Med	2018	2017-12-21			10.1055/s-0043-124873
29265497	Different effects of chronic THC on the neuroadaptive response of dopamine D2/3 receptor-mediated signaling in roman high- and roman low-avoidance rats	Tournier BB, Dimiziani A, Tsartsalis S, Millet P, Ginovart N.	Synapse. 2018 Apr;72(4). doi: 10.1002/syn.22023. Epub 2018 Jan 10.	Tournier BB	Synapse	2018	2017-12-22			10.1002/syn.22023
29266138	Determination of Cannabinoid Vapor Pressures to Aid in Vapor Phase Detection of Intoxication	Lovestead TM, Bruno TJ.	Forensic Chem. 2017 Sep;5:79-85. doi: 10.1016/j.forc.2017.06.003. Epub 2017 Jun 27.	Lovestead TM	Forensic Chem	2017	2017-12-22	PMC5733806	NIHMS923351	10.1016/j.forc.2017.06.003
29268146	Mobile contingency management as an adjunctive treatment for co-morbid cannabis use disorder and cigarette smoking	Beckham JC, Adkisson KA, Hertzberg J, Kimbrel NA, Budney AJ, Stephens RS, Moore SD, Calhoun PS.	Addict Behav. 2018 Apr;79:86-92. doi: 10.1016/j.addbeh.2017.12.007. Epub 2017 Dec 6.	Beckham JC	Addict Behav	2018	2017-12-22	PMC5807114	NIHMS924771	10.1016/j.addbeh.2017.12.007
29273570	Instability and poor recovery of cannabinoids in urine, oral fluid, and hair	White RM.	Forensic Sci Rev. 2018 Jan;30(1):33-49.	White RM	Forensic Sci Rev	2018	2017-12-24
29275132	Molecular cloning of Kuruma shrimp Marsupenaeus japonicus endonuclease-reverse transcriptase and its positive role in white spot syndrome virus and Vibrio alginolyticus infection	Ma X, Sun B, Zhu F.	Fish Shellfish Immunol. 2018 Feb;73:297-308. doi: 10.1016/j.fsi.2017.12.031. Epub 2017 Dec 22.	Ma X	Fish Shellfish Immunol	2018	2017-12-25			10.1016/j.fsi.2017.12.031
29276691	Lateral flow immunoassay and enzyme linked immunosorbent assay as effective immunomethods for the detection of synthetic cannabinoid JWH-200 based on the newly synthesized hapten	Fojtíková L, Šuláková A, Blažková M, Holubová B, Kuchař M, Mikšátková P, Lapčík O, Fukal L.	Toxicol Rep. 2017 Dec 6;5:65-75. doi: 10.1016/j.toxrep.2017.12.004. eCollection 2018.	Fojtíková L	Toxicol Rep	2017	2017-12-26	PMC5738196		10.1016/j.toxrep.2017.12.004
29277082	Routes of administration for cannabis use - basic prevalence and related health outcomes: A scoping review and synthesis	Russell C, Rueda S, Room R, Tyndall M, Fischer B.	Int J Drug Policy. 2018 Feb;52:87-96. doi: 10.1016/j.drugpo.2017.11.008. Epub 2017 Dec 22.	Russell C	Int J Drug Policy	2018	2017-12-26			10.1016/j.drugpo.2017.11.008
29277764	Distribution of Curcumin and THC in Peripheral Blood Mononuclear Cells Isolated from Healthy Individuals and Patients with Chronic Lymphocytic Leukemia	Bolger GT, Licollari A, Tan A, Greil R, Pleyer L, Vcelar B, Majeed M, Sordillo P.	Anticancer Res. 2018 Jan;38(1):121-130. doi: 10.21873/anticanres.12199.	Bolger GT	Anticancer Res	2018	2017-12-27			10.21873/anticanres.12199
29284546	Medical Emergencies Related to Ethanol and Illicit Drugs at an Annual, Nocturnal, Indoor, Electronic Dance Music Event	Calle P, Sundahl N, Maudens K, Wille SM, Van Sassenbroeck D, De Graeve K, Gogaert S, De Paepe P, Devriese D, Arno G, Blanckaert P.	Prehosp Disaster Med. 2018 Feb;33(1):71-76. doi: 10.1017/S1049023X17007099. Epub 2017 Dec 29.	Calle P	Prehosp Disaster Med	2018	2017-12-30			10.1017/S1049023X17007099
29285522	Cannabidiol Does Not Convert to Δ(9)-Tetrahydrocannabinol in an In Vivo Animal Model	Wray L, Stott C, Jones N, Wright S.	Cannabis Cannabinoid Res. 2017 Dec 1;2(1):282-287. doi: 10.1089/can.2017.0032. eCollection 2017.	Wray L	Cannabis Cannabinoid Res	2017	2017-12-30	PMC5744690		10.1089/can.2017.0032
29286085	Estrogen receptor‑β‑dependent effects of saikosaponin‑d on the suppression of oxidative stress‑induced rat hepatic stellate cell activation	Que R, Shen Y, Ren J, Tao Z, Zhu X, Li Y.	Int J Mol Med. 2018 Mar;41(3):1357-1364. doi: 10.3892/ijmm.2017.3349. Epub 2017 Dec 22.	Que R	Int J Mol Med	2018	2017-12-30	PMC5819932		10.3892/ijmm.2017.3349
29287930	PTL401, a New Formulation Based on Pro-Nano Dispersion Technology, Improves Oral Cannabinoids Bioavailability in Healthy Volunteers	Atsmon J, Cherniakov I, Izgelov D, Hoffman A, Domb AJ, Deutsch L, Deutsch F, Heffetz D, Sacks H.	J Pharm Sci. 2018 May;107(5):1423-1429. doi: 10.1016/j.xphs.2017.12.020. Epub 2017 Dec 26.	Atsmon J	J Pharm Sci	2018	2017-12-31			10.1016/j.xphs.2017.12.020
29288688	Neuroprotective activity of macamides on manganese-induced mitochondrial disruption in U-87 MG glioblastoma cells	Gugnani KS, Vu N, Rondón-Ortiz AN, Böhlke M, Maher TJ, Pino-Figueroa AJ.	Toxicol Appl Pharmacol. 2018 Feb 1;340:67-76. doi: 10.1016/j.taap.2017.12.014. Epub 2017 Dec 27.	Gugnani KS	Toxicol Appl Pharmacol	2018	2017-12-31			10.1016/j.taap.2017.12.014
29288812	Flow cytometic analysis of Penaeus monodon haemocyte responses to poly I:C	Xian JA, Zhang XX, Sun JF, Wang L, Wang DM, Li JT, Duan RJ, Lu YP, Zheng PH.	Fish Shellfish Immunol. 2018 Mar;74:62-68. doi: 10.1016/j.fsi.2017.12.045. Epub 2017 Dec 28.	Xian JA	Fish Shellfish Immunol	2018	2017-12-31			10.1016/j.fsi.2017.12.045
29291729	Insights into the molecular regulation of monolignol-derived product biosynthesis in the growing hemp hypocotyl	Behr M, Sergeant K, Leclercq CC, Planchon S, Guignard C, Lenouvel A, Renaut J, Hausman JF, Lutts S, Guerriero G.	BMC Plant Biol. 2018 Jan 2;18(1):1. doi: 10.1186/s12870-017-1213-1.	Behr M	BMC Plant Biol	2018	2018-01-03	PMC5749015		10.1186/s12870-017-1213-1
29294249	Cannabis Users Show Enhanced Expression of CB(1)-5HT(2A) Receptor Heteromers in Olfactory Neuroepithelium Cells	Galindo L, Moreno E, López-Armenta F, Guinart D, Cuenca-Royo A, Izquierdo-Serra M, Xicota L, Fernandez C, Menoyo E, Fernández-Fernández JM, Benítez-King G, Canela EI, Casadó V, Pérez V, de la Torre R, Robledo P.	Mol Neurobiol. 2018 Aug;55(8):6347-6361. doi: 10.1007/s12035-017-0833-7. Epub 2018 Jan 2.	Galindo L	Mol Neurobiol	2018	2018-01-03			10.1007/s12035-017-0833-7
29300962	Pharmacokinetic Characterization of 11-nor-9-carboxy-Δ9-tetrahydrocannabinol in Urine Following Acute Oral Cannabis Ingestion in Healthy Adults	Schlienz NJ, Cone EJ, Herrmann ES, Lembeck NA, Mitchell JM, Bigelow GE, Flegel R, LoDico CP, Hayes ED, Vandrey R.	J Anal Toxicol. 2018 May 1;42(4):232-247. doi: 10.1093/jat/bkx102.	Schlienz NJ	J Anal Toxicol	2018	2018-01-05	PMC5907340		10.1093/jat/bkx102
29301050	Field Detection of Drugs of Abuse in Oral Fluid Using the Alere™ DDS®2 Mobile Test System with Confirmation by Liquid Chromatography Tandem Mass Spectrometry (LC-MS/MS)	Krotulski AJ, Mohr ALA, Friscia M, Logan BK.	J Anal Toxicol. 2018 Apr 1;42(3):170-176. doi: 10.1093/jat/bkx105.	Krotulski AJ	J Anal Toxicol	2018	2018-01-05			10.1093/jat/bkx105
29305987	L-3,4-Dihydroxyphenylalanine (l-DOPA) induces neuroendocrinological, physiological, and immunological regulation in white shrimp, Litopenaeus vannamei	Mapanao R, Kuo HW, Chang CC, Liu KF, Cheng W.	Fish Shellfish Immunol. 2018 Mar;74:162-169. doi: 10.1016/j.fsi.2017.12.063. Epub 2018 Jan 3.	Mapanao R	Fish Shellfish Immunol	2018	2018-01-07			10.1016/j.fsi.2017.12.063
29307505	Practical considerations in medical cannabis administration and dosing	MacCallum CA, Russo EB.	Eur J Intern Med. 2018 Mar;49:12-19. doi: 10.1016/j.ejim.2018.01.004. Epub 2018 Jan 4.	MacCallum CA	Eur J Intern Med	2018	2018-01-09			10.1016/j.ejim.2018.01.004
29307631	Physicochemical properties of anti Vibrio harveyi egg yolk antibody (IgY) and its immunological influence in Indian white shrimp Fenneropenaeus indicus	Kumaran T, Thirumalaikumar E, Lelin C, Palanikumar P, Michaelbabu M, Citarasu T.	Fish Shellfish Immunol. 2018 Mar;74:349-362. doi: 10.1016/j.fsi.2017.12.062. Epub 2018 Jan 4.	Kumaran T	Fish Shellfish Immunol	2018	2018-01-09			10.1016/j.fsi.2017.12.062
29307655	RhoA/mLC signaling pathway is involved in Δ⁹-tetrahydrocannabinol-impaired placental angiogenesis	Chang X, Li H, Li Y, He Q, Yao J, Duan T, Wang K.	Toxicol Lett. 2018 Mar 15;285:148-155. doi: 10.1016/j.toxlet.2017.12.031. Epub 2018 Jan 4.	Chang X	Toxicol Lett	2018	2018-01-09			10.1016/j.toxlet.2017.12.031
29309259	Biotrickling filtration of airborne styrene: A comparison of filtration media	Chuang FJ, Chou MS, Chang HY.	J Air Waste Manag Assoc. 2018 Apr;68(4):369-376. doi: 10.1080/10962247.2017.1416002.	Chuang FJ	J Air Waste Manag Assoc	2018	2018-01-09			10.1080/10962247.2017.1416002
29310049	"Positive" urine testing for Cannabis is associated with increased risk of traffic crashes	Del Balzo G, Gottardo R, Mengozzi S, Dorizzi RM, Bortolotti F, Appolonova S, Tagliaro F.	J Pharm Biomed Anal. 2018 Mar 20;151:71-74. doi: 10.1016/j.jpba.2017.12.059. Epub 2018 Jan 3.	Del Balzo G	J Pharm Biomed Anal	2018	2018-01-09			10.1016/j.jpba.2017.12.059
29311404	Recreational Drug and Psychosocial Profile in Chronic Hepatitis C Patients Seeking Antiviral Therapy	George N, Harrell SM, Rhodes KD, Duarte-Rojo A.	Ann Hepatol. 2018 January-February;17(1):76-84. doi: 10.5604/01.3001.0010.7537.	George N	Ann Hepatol	2018	2018-01-10			10.5604/01.3001.0010.7537
29314831	A Fluorescent Probe to Unravel Functional Features of Cannabinoid Receptor CB(1) in Human Blood and Tonsil Immune System Cells	Martín-Fontecha M, Angelina A, Rückert B, Rueda-Zubiaurre A, Martín-Cruz L, van de Veen W, Akdis M, Ortega-Gutiérrez S, López-Rodríguez ML, Akdis CA, Palomares O.	Bioconjug Chem. 2018 Feb 21;29(2):382-389. doi: 10.1021/acs.bioconjchem.7b00680. Epub 2018 Jan 22.	Martín-Fontecha M	Bioconjug Chem	2018	2018-01-10			10.1021/acs.bioconjchem.7b00680
29317112	Cannabinoid Disposition After Human Intraperitoneal Use: AnInsight Into Intraperitoneal Pharmacokinetic Properties in Metastatic Cancer	Lucas CJ, Galettis P, Song S, Solowij N, Reuter SE, Schneider J, Martin JH.	Clin Ther. 2018 Sep;40(9):1442-1447. doi: 10.1016/j.clinthera.2017.12.008. Epub 2018 Jan 6.	Lucas CJ	Clin Ther	2018	2018-01-11			10.1016/j.clinthera.2017.12.008
29329090	Simultaneous accelerated solvent extraction and hydrolysis of 11-nor-Δ(9)-tetrahydrocannabinol-9-carboxylic acid glucuronide in meconium samples for gas chromatography-mass spectrometry analysis	Mantovani CC, Silva JPE, Forster G, Almeida RM, Diniz EMA, Yonamine M.	J Chromatogr B Analyt Technol Biomed Life Sci. 2018 Feb 1;1074-1075:1-7. doi: 10.1016/j.jchromb.2018.01.009. Epub 2018 Jan 7.	Mantovani CC	J Chromatogr B Analyt Technol Biomed Life Sci	2018	2018-01-13			10.1016/j.jchromb.2018.01.009
29330776	Second-Hand Exposure of Staff Administering Vaporised Cannabinoid Products to Patients in a Hospital Setting	Solowij N, Galettis P, Broyd SJ, de Krey P, Martin JH.	Drugs R D. 2018 Mar;18(1):41-44. doi: 10.1007/s40268-017-0225-5.	Solowij N	Drugs R D	2018	2018-01-14	PMC5833909		10.1007/s40268-017-0225-5
29331863	Airborne volatile aromatic hydrocarbons at an urban monitoring station in Korea from 2013 to 2015	Khan A, Szulejko JE, Kim KH, Brown RJC.	J Environ Manage. 2018 Mar 1;209:525-538. doi: 10.1016/j.jenvman.2017.12.055.	Khan A	J Environ Manage	2018	2018-01-15			10.1016/j.jenvman.2017.12.055
29335263	Exacerbation of psychosis triggered by a synthetic cannabinoid in a 70-year-old woman with Parkinson disease	Udow SJ, Freitas ME, Fox SH, Lang AE.	CMAJ. 2018 Jan 15;190(2):E50-E52. doi: 10.1503/cmaj.170361.	Udow SJ	CMAJ	2018	2018-01-17	PMC5770252		10.1503/cmaj.170361
29338068	Single and combined effects of plant-derived and synthetic cannabinoids on cognition and cannabinoid-associated withdrawal signs in mice	Myers AM, Siegele PB, Foss JD, Tuma RF, Ward SJ.	Br J Pharmacol. 2019 May;176(10):1552-1567. doi: 10.1111/bph.14147. Epub 2018 Mar 1.	Myers AM	Br J Pharmacol	2019	2018-01-17	PMC6487562		10.1111/bph.14147
29340893	A Prospective Study of Humoral and Cellular Immune Responses to Hepatitis B Vaccination in Habitual Marijuana Smokers	Kiertscher SM, Gangalum PR, Ibrahim G, Tashkin DP, Roth MD.	J Neuroimmune Pharmacol. 2018 Jun;13(2):219-229. doi: 10.1007/s11481-018-9776-7. Epub 2018 Jan 16.	Kiertscher SM	J Neuroimmune Pharmacol	2018	2018-01-18	PMC5930049	NIHMS935203	10.1007/s11481-018-9776-7
29344464	Cannabinoids in the Treatment of Epilepsy: Hard Evidence at Last?	Perucca E.	J Epilepsy Res. 2017 Dec 31;7(2):61-76. doi: 10.14581/jer.17012. eCollection 2017 Dec.	Perucca E	J Epilepsy Res	2017	2018-01-19	PMC5767492		10.14581/jer.17012
29351661	Estimation of Measurement Uncertainty in Quantitation of Benzoylecgonine (BZE) and 11-nor-Δ9-THC-9-carboxylic acid (THCA)	Arfsten DP, Roman Perez E, Goebel NC.	J Anal Toxicol. 2018 Apr 1;42(3):141-148. doi: 10.1093/jat/bkx100.	Arfsten DP	J Anal Toxicol	2018	2018-01-20			10.1093/jat/bkx100
29359294	Detection and Quantification of Cannabinoids in Extracts of Cannabis sativa Roots Using LC-MS/MS	Gul W, Gul SW, Chandra S, Lata H, Ibrahim EA, ElSohly MA.	Planta Med. 2018 Mar;84(4):267-271. doi: 10.1055/s-0044-100798. Epub 2018 Jan 22.	Gul W	Planta Med	2018	2018-01-24			10.1055/s-0044-100798
29360751	Estrogenic Effects of the Extracts from the Chinese Yam (Dioscorea opposite Thunb.) and Its Effective Compounds in Vitro and in Vivo	Zeng M, Zhang L, Li M, Zhang B, Zhou N, Ke Y, Feng W, Zheng X.	Molecules. 2018 Jan 23;23(2):11. doi: 10.3390/molecules23020011.	Zeng M	Molecules	2018	2018-01-24	PMC6017084		10.3390/molecules23020011
29370543	Driving under the influence of alcohol and drugs in the eastern part of Denmark in 2015 and 2016: Abuse patterns and trends	Simonsen KW, Linnet K, Rasmussen BS.	Traffic Inj Prev. 2018 Jul 4;19(5):468-475. doi: 10.1080/15389588.2018.1428743.	Simonsen KW	Traffic Inj Prev	2018	2018-01-26			10.1080/15389588.2018.1428743
29377919	Associations of recent weight loss with health care costs and utilization among older women	Schousboe JT, Kats AM, Langsetmo L, Taylor BC, Vo TN, Kado DM, Fink HA, Ensrud KE.	PLoS One. 2018 Jan 29;13(1):e0191642. doi: 10.1371/journal.pone.0191642. eCollection 2018.	Schousboe JT	PLoS One	2018	2018-01-30	PMC5788355		10.1371/journal.pone.0191642
29379971	Contemporary Routes of Cannabis Consumption: A Primer for Clinicians	Peters J, Chien J.	J Am Osteopath Assoc. 2018 Feb 1;118(2):67-70. doi: 10.7556/jaoa.2018.020.	Peters J	J Am Osteopath Assoc	2018	2018-01-31			10.7556/jaoa.2018.020
29382407	Changes in cannabis potency and first-time admissions to drug treatment: a 16-year study in the Netherlands	Freeman TP, van der Pol P, Kuijpers W, Wisselink J, Das RK, Rigter S, van Laar M, Griffiths P, Swift W, Niesink R, Lynskey MT.	Psychol Med. 2018 Oct;48(14):2346-2352. doi: 10.1017/S0033291717003877. Epub 2018 Jan 31.	Freeman TP	Psychol Med	2018	2018-02-01			10.1017/S0033291717003877
29385080	A Systematic Review and Meta-Analysis of the In Vivo Haemodynamic Effects of Δ⁸-Tetrahydrocannabinol	Sultan SR, Millar SA, O'Sullivan SE, England TJ.	Pharmaceuticals (Basel). 2018 Jan 31;11(1):13. doi: 10.3390/ph11010013.	Sultan SR	Pharmaceuticals (Basel)	2018	2018-02-01	PMC5874709		10.3390/ph11010013
29385147	Nabiximols combined with motivational enhancement/cognitive behavioral therapy for the treatment of cannabis dependence: A pilot randomized clinical trial	Trigo JM, Soliman A, Quilty LC, Fischer B, Rehm J, Selby P, Barnes AJ, Huestis MA, George TP, Streiner DL, Staios G, Le Foll B.	PLoS One. 2018 Jan 31;13(1):e0190768. doi: 10.1371/journal.pone.0190768. eCollection 2018.	Trigo JM	PLoS One	2018	2018-02-01	PMC5791962		10.1371/journal.pone.0190768
29388063	Medical Cannabis for Neuropathic Pain	Lee G, Grovey B, Furnish T, Wallace M.	Curr Pain Headache Rep. 2018 Feb 1;22(1):8. doi: 10.1007/s11916-018-0658-8.	Lee G	Curr Pain Headache Rep	2018	2018-02-02			10.1007/s11916-018-0658-8
29389810	Exposure to Oil Spill Chemicals and Lung Function in Deepwater Horizon Disaster Response Workers	Gam KB, Kwok RK, Engel LS, Curry MD, Stewart PA, Stenzel MR, McGrath JA, Jackson WB 2nd, Jensen RL, Lichtveld MY, Miller AK, Sandler DP.	J Occup Environ Med. 2018 Jun;60(6):e312-e318. doi: 10.1097/JOM.0000000000001292.	Gam KB	J Occup Environ Med	2018	2018-02-02	PMC5995629	NIHMS937518	10.1097/JOM.0000000000001292
29400010	Systematic review and meta-analysis of cannabinoids in palliative medicine	Mücke M, Weier M, Carter C, Copeland J, Degenhardt L, Cuhls H, Radbruch L, Häuser W, Conrad R.	J Cachexia Sarcopenia Muscle. 2018 Apr;9(2):220-234. doi: 10.1002/jcsm.12273. Epub 2018 Feb 5.	Mücke M	J Cachexia Sarcopenia Muscle	2018	2018-02-06	PMC5879974		10.1002/jcsm.12273
29406477	Intoxication From Accidental Marijuana Ingestion in Pediatric Patients: What May Lie Ahead	Boadu O, Gombolay GY, Caviness VS, El Saleeby CM.	Pediatr Emerg Care. 2020 Jun;36(6):e349-e354. doi: 10.1097/PEC.0000000000001420.	Boadu O	Pediatr Emerg Care	2020	2018-02-07			10.1097/PEC.0000000000001420
29407614	Molecular characterization of diphthamide biosynthesis protein 7 in Marsupenaeus japonicus and its role in white spot syndrome virus infection	Wang Z, Sun B, Zhu F.	Fish Shellfish Immunol. 2018 Apr;75:8-16. doi: 10.1016/j.fsi.2018.01.040. Epub 2018 Jan 31.	Wang Z	Fish Shellfish Immunol	2018	2018-02-07			10.1016/j.fsi.2018.01.040
29408093	Analysis of the pharmacological properties of JWH-122 isomers and THJ-2201, RCS-4 and AB-CHMINACA in HEK293T cells and hippocampal neurons	Costain WJ, Rasquinha I, Comas T, Hewitt M, Aylsworth A, Rouleau Y, Marleau V, Soo EC, Tauskela JS.	Eur J Pharmacol. 2018 Mar 15;823:96-104. doi: 10.1016/j.ejphar.2018.01.043. Epub 2018 Feb 4.	Costain WJ	Eur J Pharmacol	2018	2018-02-07			10.1016/j.ejphar.2018.01.043
29408467	Δ(9)-Tetrahydrocannabinol changes the brain lipidome and transcriptome differentially in the adolescent and the adult	Leishman E, Murphy M, Mackie K, Bradshaw HB.	Biochim Biophys Acta Mol Cell Biol Lipids. 2018 May;1863(5):479-492. doi: 10.1016/j.bbalip.2018.02.001. Epub 2018 Feb 8.	Leishman E	Biochim Biophys Acta Mol Cell Biol Lipids	2018	2018-02-07	PMC5987162	NIHMS965813	10.1016/j.bbalip.2018.02.001
29408718	Detection of delta-9-tetrahydrocannabinol (THC) in oral fluid, blood and urine following oral consumption of low-content THC hemp oil	Hayley AC, Downey LA, Hansen G, Dowell A, Savins D, Buchta R, Catubig R, Houlden R, Stough CKK.	Forensic Sci Int. 2018 Mar;284:101-106. doi: 10.1016/j.forsciint.2017.12.033. Epub 2017 Dec 24.	Hayley AC	Forensic Sci Int	2018	2018-02-07			10.1016/j.forsciint.2017.12.033
29408729	Analysis of illicit drugs seized in the Province of Florence from 2006 to 2016	Bertol E, Bigagli L, D'Errico S, Mari F, Palumbo D, Pascali JP, Vaiano F.	Forensic Sci Int. 2018 Mar;284:194-203. doi: 10.1016/j.forsciint.2018.01.010. Epub 2018 Feb 3.	Bertol E	Forensic Sci Int	2018	2018-02-07			10.1016/j.forsciint.2018.01.010
29409046	Evaluation of Dräger DrugTest 5000 in a Naturalistic Setting	Gjerde H, Clausen GB, Andreassen E, Furuhaugen H.	J Anal Toxicol. 2018 May 1;42(4):248-254. doi: 10.1093/jat/bky003.	Gjerde H	J Anal Toxicol	2018	2018-02-07			10.1093/jat/bky003
29414765	Δ(9)-Tetrahydrocannabinol induces endocannabinoid accumulation in mouse hepatocytes: antagonism by Fabp1 gene ablation	McIntosh AL, Martin GG, Huang H, Landrock D, Kier AB, Schroeder F.	J Lipid Res. 2018 Apr;59(4):646-657. doi: 10.1194/jlr.M082644. Epub 2018 Feb 5.	McIntosh AL	J Lipid Res	2018	2018-02-08	PMC5880504		10.1194/jlr.M082644
29420073	Open-label pilot study of injectable naltrexone for cannabis dependence	Notzon DP, Kelly MA, Choi CJ, Pavlicova M, Mahony AL, Brooks DJ, Mariani JJ, Levin FR.	Am J Drug Alcohol Abuse. 2018;44(6):619-627. doi: 10.1080/00952990.2017.1423321. Epub 2018 Feb 8.	Notzon DP	Am J Drug Alcohol Abuse	2018	2018-02-09	PMC6082728	NIHMS947015	10.1080/00952990.2017.1423321
29421753	Occurrence of illicit drugs in two wastewater treatment plants in the South of Italy	Cosenza A, Maida CM, Piscionieri D, Fanara S, Di Gaudio F, Viviani G.	Chemosphere. 2018 May;198:377-385. doi: 10.1016/j.chemosphere.2018.01.158. Epub 2018 Feb 3.	Cosenza A	Chemosphere	2018	2018-02-09			10.1016/j.chemosphere.2018.01.158
29422104	Paradigm-shift: radiological changes in the asymptomatic iNPH-patient to be: an observational study	Engel DC, Adib SD, Schuhmann MU, Brendle C.	Fluids Barriers CNS. 2018 Feb 9;15(1):5. doi: 10.1186/s12987-018-0090-9.	Engel DC	Fluids Barriers CNS	2018	2018-02-10	PMC5806389		10.1186/s12987-018-0090-9
29423994	Functional effects of synthetic cannabinoids versus Δ(9) -THC in mice on body temperature, nociceptive threshold, anxiety, cognition, locomotor/exploratory parameters and depression	Schreiber S, Bader M, Lenchinski T, Meningher I, Rubovitch V, Katz Y, Cohen E, Gabet Y, Rotenberg M, Wolf EU, Pick CG.	Addict Biol. 2019 May;24(3):414-425. doi: 10.1111/adb.12606. Epub 2018 Feb 8.	Schreiber S	Addict Biol	2019	2018-02-10			10.1111/adb.12606
29435545	Ternary CBe(4)Au(4) cluster: a 16-electron system with quasi-planar tetracoordinate carbon	Guo JC , Feng LY , Zhai HJ .	Phys Chem Chem Phys. 2018 Feb 28;20(9):6299-6306. doi: 10.1039/c7cp08420j.	Guo JC	Phys Chem Chem Phys	2018	2018-02-14			10.1039/c7cp08420j
29435591	Effect of Including Alcohol and Cannabis Content in a Sexual Risk-Reduction Intervention on the Incidence of Sexually Transmitted Infections in Adolescents: A Cluster Randomized Clinical Trial	Bryan AD, Magnan RE, Gillman AS, Yeater EA, Feldstein Ewing SW, Kong AS, Schmiege SJ.	JAMA Pediatr. 2018 Apr 2;172(4):e175621. doi: 10.1001/jamapediatrics.2017.5621. Epub 2018 Apr 2.	Bryan AD	JAMA Pediatr	2018	2018-02-14	PMC5875326		10.1001/jamapediatrics.2017.5621
29436654	Tetrahydrocurcumin‑induced autophagy via suppression of PI3K/Akt/mTOR in non‑small cell lung carcinoma cells	Song G, Lu H, Chen F, Wang Y, Fan W, Shao W, Lu H, Lin B.	Mol Med Rep. 2018 Apr;17(4):5964-5969. doi: 10.3892/mmr.2018.8600. Epub 2018 Feb 13.	Song G	Mol Med Rep	2018	2018-02-14			10.3892/mmr.2018.8600
29438604	Increased Burden of Psychiatric Disorders in Rheumatoid Arthritis	Marrie RA, Hitchon CA, Walld R, Patten SB, Bolton JM, Sareen J, Walker JR, Singer A, Lix LM, El-Gabalawy R, Katz A, Fisk JD, Bernstein CN; Canadian Institutes of Health Research Team in Defining the Burden and Managing the Effects of Psychiatric Comorbidity in Chronic Immunoinflammatory Disease.	Arthritis Care Res (Hoboken). 2018 Jul;70(7):970-978. doi: 10.1002/acr.23539. Epub 2018 May 21.	Marrie RA	Arthritis Care Res (Hoboken)	2018	2018-02-14	PMC6033023		10.1002/acr.23539
29438643	Encephalopathy after chocolate consumption	Kunchok A, Spring PJ, Hayes MW.	Med J Aust. 2018 Feb 19;208(3):110. doi: 10.5694/mja16.01444.	Kunchok A	Med J Aust	2018	2018-02-14			10.5694/mja16.01444
29441458	Cannabinoid-induced cell death in endometrial cancer cells: involvement of TRPV1 receptors in apoptosis	Fonseca BM, Correia-da-Silva G, Teixeira NA.	J Physiol Biochem. 2018 May;74(2):261-272. doi: 10.1007/s13105-018-0611-7. Epub 2018 Feb 13.	Fonseca BM	J Physiol Biochem	2018	2018-02-15			10.1007/s13105-018-0611-7
29441730	Potency of Δ(9) -tetrahydrocannabinol and other cannabinoids in cannabis in England in 2016: Implications for public health and pharmacology	Potter DJ, Hammond K, Tuffnell S, Walker C, Di Forti M.	Drug Test Anal. 2018 Apr;10(4):628-635. doi: 10.1002/dta.2368. Epub 2018 Feb 27.	Potter DJ	Drug Test Anal	2018	2018-02-15			10.1002/dta.2368
29442178	The Use of Cannabis and Cannabinoids in Treating Symptoms of Multiple Sclerosis: a Systematic Review of Reviews	Nielsen S, Germanos R, Weier M, Pollard J, Degenhardt L, Hall W, Buckley N, Farrell M.	Curr Neurol Neurosci Rep. 2018 Feb 13;18(2):8. doi: 10.1007/s11910-018-0814-x.	Nielsen S	Curr Neurol Neurosci Rep	2018	2018-02-15			10.1007/s11910-018-0814-x
29446742	Development of an In-vitro Drug Delivery Efficiency Test for a Pulmonary Toxicokinetic Pig Study	Schaefer N, Kroll AK, Laschke MW, Menger MD, Maurer HH, Meyer MR, Schmidt PH.	Curr Drug Deliv. 2018;15(8):1167-1171. doi: 10.2174/1567201815666180214130014.	Schaefer N	Curr Drug Deliv	2018	2018-02-16			10.2174/1567201815666180214130014
29446832	An assessment of (18) F-FDG PET/CT for thoracic screening and risk stratification of pulmonary nodules in multiple endocrine neoplasia type 1	So A, Pointon O, Hodgson R, Burgess J.	Clin Endocrinol (Oxf). 2018 May;88(5):683-691. doi: 10.1111/cen.13573. Epub 2018 Mar 6.	So A	Clin Endocrinol (Oxf)	2018	2018-02-16			10.1111/cen.13573
29446927	Gasoline Particulate Filters as an Effective Tool to Reduce Particulate and Polycyclic Aromatic Hydrocarbon Emissions from Gasoline Direct Injection (GDI) Vehicles: A Case Study with Two GDI Vehicles	Yang J, Roth P, Durbin TD, Johnson KC, Cocker DR 3rd, Asa-Awuku A, Brezny R, Geller M, Karavalakis G.	Environ Sci Technol. 2018 Mar 6;52(5):3275-3284. doi: 10.1021/acs.est.7b05641. Epub 2018 Feb 21.	Yang J	Environ Sci Technol	2018	2018-02-16			10.1021/acs.est.7b05641
29450258	The Cannabinoids Δ(8)THC, CBD, and HU-308 Act via Distinct Receptors to Reduce Corneal Pain and Inflammation	Thapa D, Cairns EA, Szczesniak AM, Toguri JT, Caldwell MD, Kelly MEM.	Cannabis Cannabinoid Res. 2018 Feb 1;3(1):11-20. doi: 10.1089/can.2017.0041. eCollection 2018.	Thapa D	Cannabis Cannabinoid Res	2018	2018-02-17	PMC5812319		10.1089/can.2017.0041
29453495	Comparison of concentrations of drugs between blood samples with and without fluoride additive-important findings for Δ(9)-tetrahydrocannabinol and amphetamine	Wiedfeld C, Krueger J, Skopp G, Musshoff F.	Int J Legal Med. 2019 Jan;133(1):109-116. doi: 10.1007/s00414-018-1797-5. Epub 2018 Feb 17.	Wiedfeld C	Int J Legal Med	2019	2018-02-18			10.1007/s00414-018-1797-5
29454037	Melatonin attenuates Δ(9)-tetrahydrocannabinol-induced reduction in rat sperm motility and kinematics in-vitro	Alagbonsi IA, Olayaki LA.	Reprod Toxicol. 2018 Apr;77:62-69. doi: 10.1016/j.reprotox.2018.02.005. Epub 2018 Feb 14.	Alagbonsi IA	Reprod Toxicol	2018	2018-02-18			10.1016/j.reprotox.2018.02.005
29457201	Validity of oral fluid test for Delta-9-tetrahydrocannabinol in drivers using the 2013 National Roadside Survey Data	Jin H, Williams SZ, Chihuri ST, Li G, Chen Q.	Inj Epidemiol. 2018 Feb 19;5(1):3. doi: 10.1186/s40621-018-0134-2.	Jin H	Inj Epidemiol	2018	2018-02-20	PMC5817052		10.1186/s40621-018-0134-2
29457671	Abstinence and reduced frequency of use are associated with improvements in quality of life among treatment-seekers with cannabis use disorder	Brezing CA, Choi CJ, Pavlicova M, Brooks D, Mahony AL, Mariani JJ, Levin FR.	Am J Addict. 2018 Mar;27(2):101-107. doi: 10.1111/ajad.12660. Epub 2018 Feb 19.	Brezing CA	Am J Addict	2018	2018-02-20	PMC5846101	NIHMS947333	10.1111/ajad.12660
29457829	Species-specific susceptibility to cannabis-induced convulsions	Whalley BJ, Lin H, Bell L, Hill T, Patel A, Gray RA, Elizabeth Roberts C, Devinsky O, Bazelot M, Williams CM, Stephens GJ.	Br J Pharmacol. 2019 May;176(10):1506-1523. doi: 10.1111/bph.14165. Epub 2018 Mar 25.	Whalley BJ	Br J Pharmacol	2019	2018-02-20	PMC6487554		10.1111/bph.14165
29461336	Sex differences in antinociceptive response to Δ-9-tetrahydrocannabinol and CP 55,940 in the mouse formalin test	LaFleur RA, Wilson RP, Morgan DJ, Henderson-Redmond AN.	Neuroreport. 2018 Apr 11;29(6):447-452. doi: 10.1097/WNR.0000000000000993.	LaFleur RA	Neuroreport	2018	2018-02-21	PMC6112616	NIHMS938874	10.1097/WNR.0000000000000993
29462111	Medication overuse headache following repeated morphine, but not [INCREMENT]9-tetrahydrocannabinol administration in the female rat	Kandasamy R, Dawson CT, Hilgendorf TN, Morgan MM.	Behav Pharmacol. 2018 Aug;29(5):469-472. doi: 10.1097/FBP.0000000000000382.	Kandasamy R	Behav Pharmacol	2018	2018-02-21	PMC6035110	NIHMS934081	10.1097/FBP.0000000000000382
29463913	Impact of co-administration of oxycodone and smoked cannabis on analgesia and abuse liability	Cooper ZD, Bedi G, Ramesh D, Balter R, Comer SD, Haney M.	Neuropsychopharmacology. 2018 Sep;43(10):2046-2055. doi: 10.1038/s41386-018-0011-2. Epub 2018 Feb 5.	Cooper ZD	Neuropsychopharmacology	2018	2018-02-22	PMC6098090		10.1038/s41386-018-0011-2
29464734	Prevalence of potential sexual abuse in adolescents and young adults and feasibility of an assessment and management plan used in three research projects	Morrow C, Thomas R, Ding L, Kahn JA.	Res Nurs Health. 2018 Apr;41(2):166-172. doi: 10.1002/nur.21850. Epub 2018 Feb 21.	Morrow C	Res Nurs Health	2018	2018-02-22	PMC7305795	NIHMS1597834	10.1002/nur.21850
29464872	Time-dependent effect of phytocannabinoid treatments in fat cells	Ramlugon S, Levendal RA, Frost CL.	Phytother Res. 2018 Jun;32(6):1080-1089. doi: 10.1002/ptr.6047. Epub 2018 Feb 21.	Ramlugon S	Phytother Res	2018	2018-02-22			10.1002/ptr.6047
29468071	Dietary tetrahydrocurcumin reduces renal fibrosis and cardiac hypertrophy in 5/6 nephrectomized rats	Lau WL, Khazaeli M, Savoj J, Manekia K, Bangash M, Thakurta RG, Dang A, Vaziri ND, Singh B.	Pharmacol Res Perspect. 2018 Feb 19;6(2):e00385. doi: 10.1002/prp2.385. eCollection 2018 Apr.	Lau WL	Pharmacol Res Perspect	2018	2018-02-23	PMC5817151		10.1002/prp2.385
29471387	Heavy Cannabis Use Associated With Reduction in Activated and Inflammatory Immune Cell Frequencies in Antiretroviral Therapy-Treated Human Immunodeficiency Virus-Infected Individuals	Manuzak JA, Gott TM, Kirkwood JS, Coronado E, Hensley-McBain T, Miller C, Cheu RK, Collier AC, Funderburg NT, Martin JN, Wu MC, Isoherranen N, Hunt PW, Klatt NR.	Clin Infect Dis. 2018 Jun 1;66(12):1872-1882. doi: 10.1093/cid/cix1116.	Manuzak JA	Clin Infect Dis	2018	2018-02-23	PMC6248381		10.1093/cid/cix1116
29471875	Pre-treatment DWI as a predictor of overall survival in locally advanced pancreatic cancer treated with Cyberknife radiotherapy and sequential S-1 therapy	Zhang Y, Zhu X, Liu D, Song J, Zhang H, Lu J.	Cancer Imaging. 2018 Feb 22;18(1):6. doi: 10.1186/s40644-018-0139-7.	Zhang Y	Cancer Imaging	2018	2018-02-24	PMC5824450		10.1186/s40644-018-0139-7
29481070	Theoretical Insights into Monometallofullerene Th@C(76): Strong Covalent Interaction between Thorium and the Carbon Cage	Zhao P, Zhao X, Ehara M.	Inorg Chem. 2018 Mar 19;57(6):2961-2964. doi: 10.1021/acs.inorgchem.7b03114. Epub 2018 Feb 26.	Zhao P	Inorg Chem	2018	2018-02-27			10.1021/acs.inorgchem.7b03114
29481316	Adolescent THC exposure in female rats leads to cognitive deficits through a mechanism involving chromatin modifications in the prefrontal cortex	Prini P, Rusconi F, Zamberletti E, Gabaglio M, Penna F, Fasano M, Battaglioli E, Parolaro D, Rubino T.	J Psychiatry Neurosci. 2018 Mar;43(2):87-101. doi: 10.1503/jpn.170082. Epub 2017 Oct 12.	Prini P	J Psychiatry Neurosci	2018	2018-02-27	PMC5837889		10.1503/jpn.170082
29482896	Police documentation of drug use in injured drivers: Implications for monitoring and preventing drug-impaired driving	Brubacher JR, Chan H, Erdelyi S, Asbridge M, Mann RE, Purssell RA, Solomon R.	Accid Anal Prev. 2018 Sep;118:200-206. doi: 10.1016/j.aap.2018.02.018. Epub 2018 Feb 23.	Brubacher JR	Accid Anal Prev	2018	2018-02-28			10.1016/j.aap.2018.02.018
29492979	The enhanced effect of tetrahydrocurcumin on radiosensitivity of glioma cells	Zhang X, Peng L, Liu A, Ji J, Zhao L, Zhai G.	J Pharm Pharmacol. 2018 Jun;70(6):749-759. doi: 10.1111/jphp.12891. Epub 2018 Mar 1.	Zhang X	J Pharm Pharmacol	2018	2018-03-02			10.1111/jphp.12891
29495967	Hypoxia mimetic activity of VCE-004.8, a cannabidiol quinone derivative: implications for multiple sclerosis therapy	Navarrete C, Carrillo-Salinas F, Palomares B, Mecha M, Jiménez-Jiménez C, Mestre L, Feliú A, Bellido ML, Fiebich BL, Appendino G, Calzado MA, Guaza C, Muñoz E.	J Neuroinflammation. 2018 Mar 1;15(1):64. doi: 10.1186/s12974-018-1103-y.	Navarrete C	J Neuroinflammation	2018	2018-03-03	PMC5831753		10.1186/s12974-018-1103-y
29502548	Increased hippocampal engagement during learning as a marker of sensitivity to psychotomimetic effects of δ-9-THC	Bhattacharyya S, Sainsbury T, Allen P, Nosarti C, Atakan Z, Giampietro V, Brammer M, McGuire PK.	Psychol Med. 2018 Dec;48(16):2748-2756. doi: 10.1017/S0033291718000387. Epub 2018 Mar 5.	Bhattacharyya S	Psychol Med	2018	2018-03-06			10.1017/S0033291718000387
29513392	Cannabis-based medicines for chronic neuropathic pain in adults	Mücke M, Phillips T, Radbruch L, Petzke F, Häuser W.	Cochrane Database Syst Rev. 2018 Mar 7;3(3):CD012182. doi: 10.1002/14651858.CD012182.pub2.	Mücke M	Cochrane Database Syst Rev	2018	2018-03-08	PMC6494210		10.1002/14651858.CD012182.pub2
29522717	Altered metabolism of synthetic cannabinoid JWH-018 by human cytochrome P450 2C9 and variants	Patton AL, Seely KA, Yarbrough AL, Fantegrossi W, James LP, McCain KR, Fujiwara R, Prather PL, Moran JH, Radominska-Pandya A.	Biochem Biophys Res Commun. 2018 Apr 6;498(3):597-602. doi: 10.1016/j.bbrc.2018.03.028. Epub 2018 Mar 10.	Patton AL	Biochem Biophys Res Commun	2018	2018-03-10	PMC6425723	NIHMS1017710	10.1016/j.bbrc.2018.03.028
29528549	Clinical response to Nabiximols correlates with the downregulation of immune pathways in multiple sclerosis	Sorosina M, Clarelli F, Ferrè L, Osiceanu AM, Unal NT, Mascia E, Martinelli V, Comi G, Benigni F, Esposito F, Martinelli Boneschi F.	Eur J Neurol. 2018 Jul;25(7):934-e70. doi: 10.1111/ene.13623. Epub 2018 Apr 16.	Sorosina M	Eur J Neurol	2018	2018-03-13			10.1111/ene.13623
29533137	Balance worsening associated with nabiximols in multiple sclerosis	Castelli L, Prosperini L, Pozzilli C.	Mult Scler. 2019 Jan;25(1):113-117. doi: 10.1177/1352458518765649. Epub 2018 Mar 13.	Castelli L	Mult Scler	2019	2018-03-14			10.1177/1352458518765649
29535069	Residual effects of cannabis use in adolescent and adult brains - A meta-analysis of fMRI studies	Blest-Hopley G, Giampietro V, Bhattacharyya S.	Neurosci Biobehav Rev. 2018 May;88:26-41. doi: 10.1016/j.neubiorev.2018.03.008. Epub 2018 Mar 10.	Blest-Hopley G	Neurosci Biobehav Rev	2018	2018-03-15			10.1016/j.neubiorev.2018.03.008
29537478	Characteristics of Graduating Family Medicine Residents Who Intend to Practice Maternity Care	Tong ST, Hochheimer CJ, Barr WB, Leveroni-Calvi M, Lefevre NM, Wallenborn JT, Peterson LE.	Fam Med. 2018 May;50(5):345-352. doi: 10.22454/FamMed.2018.631796. Epub 2018 Mar 8.	Tong ST	Fam Med	2018	2018-03-15			10.22454/FamMed.2018.631796
29538683	A Randomized, Double-blind, Placebo-controlled, Parallel-group, Pilot Study of Cannabidiol-rich Botanical Extract in the Symptomatic Treatment of Ulcerative Colitis	Irving PM, Iqbal T, Nwokolo C, Subramanian S, Bloom S, Prasad N, Hart A, Murray C, Lindsay JO, Taylor A, Barron R, Wright S.	Inflamm Bowel Dis. 2018 Mar 19;24(4):714-724. doi: 10.1093/ibd/izy002.	Irving PM	Inflamm Bowel Dis	2018	2018-03-15			10.1093/ibd/izy002
29540728	The Cannabinoid Content of Legal Cannabis in Washington State Varies Systematically Across Testing Facilities and Popular Consumer Products	Jikomes N, Zoorob M.	Sci Rep. 2018 Mar 14;8(1):4519. doi: 10.1038/s41598-018-22755-2.	Jikomes N	Sci Rep	2018	2018-03-16	PMC5852027		10.1038/s41598-018-22755-2
29549004	Optimization of Δ(9)-tetrahydrocannabinolic acid synthase production in Komagataella phaffii via post-translational bottleneck identification	Zirpel B, Degenhardt F, Zammarelli C, Wibberg D, Kalinowski J, Stehle F, Kayser O.	J Biotechnol. 2018 Apr 20;272-273:40-47. doi: 10.1016/j.jbiotec.2018.03.008. Epub 2018 Mar 13.	Zirpel B	J Biotechnol	2018	2018-03-18			10.1016/j.jbiotec.2018.03.008
29549157	Molecular and Behavioral Pharmacological Characterization of Abused Synthetic Cannabinoids MMB- and MDMB-FUBINACA, MN-18, NNEI, CUMYL-PICA, and 5-Fluoro-CUMYL-PICA	Gamage TF, Farquhar CE, Lefever TW, Marusich JA, Kevin RC, McGregor IS, Wiley JL, Thomas BF.	J Pharmacol Exp Ther. 2018 May;365(2):437-446. doi: 10.1124/jpet.117.246983. Epub 2018 Mar 16.	Gamage TF	J Pharmacol Exp Ther	2018	2018-03-18	PMC5932312		10.1124/jpet.117.246983
29550900	Short-Term Genetic Selection for Adolescent Locomotor Sensitivity to Delta9-Tetrahydrocannabinol (THC)	Kasten CR, Zhang Y, Mackie K, Boehm SL 2nd.	Behav Genet. 2018 May;48(3):224-235. doi: 10.1007/s10519-018-9894-2. Epub 2018 Mar 17.	Kasten CR	Behav Genet	2018	2018-03-19	PMC5935564	NIHMS952234	10.1007/s10519-018-9894-2
29555320	Steroid profiles in both blood serum and seminal plasma are not correlated and do not reflect sperm quality: Study on the male reproductive health of fifty young Swiss men	Zufferey F, Rahban R, Garcia A, Gagnebin Y, Boccard J, Tonoli D, Jeanneret F, Stettler E, Senn A, Nef S, Rudaz S, Rossier MF.	Clin Biochem. 2018 Dec;62:39-46. doi: 10.1016/j.clinbiochem.2018.03.008. Epub 2018 Mar 16.	Zufferey F	Clin Biochem	2018	2018-03-21			10.1016/j.clinbiochem.2018.03.008
29556883	Cannabis Addiction and the Brain: a Review	Zehra A, Burns J, Liu CK, Manza P, Wiers CE, Volkow ND, Wang GJ.	J Neuroimmune Pharmacol. 2018 Dec;13(4):438-452. doi: 10.1007/s11481-018-9782-9. Epub 2018 Mar 19.	Zehra A	J Neuroimmune Pharmacol	2018	2018-03-21	PMC6223748		10.1007/s11481-018-9782-9
29558737	How much separation for LC-MS/MS quantitative bioanalysis of drugs and metabolites?	Tan A, Fanaras JC.	J Chromatogr B Analyt Technol Biomed Life Sci. 2018 May 1;1084:23-35. doi: 10.1016/j.jchromb.2018.03.019. Epub 2018 Mar 14.	Tan A	J Chromatogr B Analyt Technol Biomed Life Sci	2018	2018-03-21			10.1016/j.jchromb.2018.03.019
29559524	Activity-Based Detection of Cannabinoids in Serum and Plasma Samples	Cannaert A, Storme J, Hess C, Auwärter V, Wille SMR, Stove CP.	Clin Chem. 2018 Jun;64(6):918-926. doi: 10.1373/clinchem.2017.285361. Epub 2018 Mar 20.	Cannaert A	Clin Chem	2018	2018-03-22			10.1373/clinchem.2017.285361
29559924	Short-Term Exposure of Mytilus coruscus to Decreased pH and Salinity Change Impacts Immune Parameters of Their Haemocytes	Wu F, Xie Z, Lan Y, Dupont S, Sun M, Cui S, Huang X, Huang W, Liu L, Hu M, Lu W, Wang Y.	Front Physiol. 2018 Mar 6;9:166. doi: 10.3389/fphys.2018.00166. eCollection 2018.	Wu F	Front Physiol	2018	2018-03-22	PMC5845731		10.3389/fphys.2018.00166
29574346	Evaluation of three rapid oral fluid test devices on the screening of multiple drugs of abuse including ketamine	Tang MHY, Ching CK, Poon S, Chan SSS, Ng WY, Lam M, Wong CK, Pao R, Lau A, Mak TWL.	Forensic Sci Int. 2018 May;286:113-120. doi: 10.1016/j.forsciint.2018.03.004. Epub 2018 Mar 12.	Tang MHY	Forensic Sci Int	2018	2018-03-26			10.1016/j.forsciint.2018.03.004
29574368	Estimation of the consumption of illicit drugs during special events in two communities in Western Kentucky, USA using sewage epidemiology	Foppe KS, Hammond-Weinberger DR, Subedi B.	Sci Total Environ. 2018 Aug 15;633:249-256. doi: 10.1016/j.scitotenv.2018.03.175. Epub 2018 Mar 22.	Foppe KS	Sci Total Environ	2018	2018-03-26	PMC5949093	NIHMS954459	10.1016/j.scitotenv.2018.03.175
29574698	Biphasic effects of THC in memory and cognition	Calabrese EJ, Rubio-Casillas A.	Eur J Clin Invest. 2018 May;48(5):e12920. doi: 10.1111/eci.12920. Epub 2018 Apr 2.	Calabrese EJ	Eur J Clin Invest	2018	2018-03-26			10.1111/eci.12920
29576792	Cannabis Essential Oil: A Preliminary Study for the Evaluation of the Brain Effects	Gulluni N, Re T, Loiacono I, Lanzo G, Gori L, Macchi C, Epifani F, Bragazzi N, Firenzuoli F.	Evid Based Complement Alternat Med. 2018 Jan 17;2018:1709182. doi: 10.1155/2018/1709182. eCollection 2018.	Gulluni N	Evid Based Complement Alternat Med	2018	2018-03-27	PMC5822802		10.1155/2018/1709182
29580953	Effects of drugs of abuse on channelrhodopsin-2 function	Gioia DA, Xu M, Wayman WN, Woodward JJ.	Neuropharmacology. 2018 Jun;135:316-327. doi: 10.1016/j.neuropharm.2018.03.031. Epub 2018 Mar 23.	Gioia DA	Neuropharmacology	2018	2018-03-28	PMC5975088	NIHMS957473	10.1016/j.neuropharm.2018.03.031
29601658	Chromatographic characterisation of 11 phytocannabinoids: Quantitative and fit-to-purpose performance as a function of extra-column variance	Noestheden M, Friedlander G, Anspach J, Krepich S, Hyland KC, Zandberg WF.	Phytochem Anal. 2018 Sep;29(5):507-515. doi: 10.1002/pca.2761. Epub 2018 Mar 30.	Noestheden M	Phytochem Anal	2018	2018-03-31			10.1002/pca.2761
29602054	A novel single-step GC-MS/MS method for cannabinoids and 11-OH-THC metabolite analysis in hair	Angeli I, Casati S, Ravelli A, Minoli M, Orioli M.	J Pharm Biomed Anal. 2018 Jun 5;155:1-6. doi: 10.1016/j.jpba.2018.03.031. Epub 2018 Mar 16.	Angeli I	J Pharm Biomed Anal	2018	2018-03-31			10.1016/j.jpba.2018.03.031
29602148	Delta-9-tetrahydrocannabinolic acid A (THC-A) in urine of a 15-month-old child: A case report	Morini L, Quaiotti J, Moretti M, Osculati AMM, Tajana L, Groppi A, Vignali C.	Forensic Sci Int. 2018 May;286:208-212. doi: 10.1016/j.forsciint.2018.03.020. Epub 2018 Mar 19.	Morini L	Forensic Sci Int	2018	2018-03-31			10.1016/j.forsciint.2018.03.020
29604295	Cannabinoid receptor-mediated disruption of sensory gating and neural oscillations: A translational study in rats and humans	Skosnik PD, Hajós M, Cortes-Briones JA, Edwards CR, Pittman BP, Hoffmann WE, Sewell AR, D'Souza DC, Ranganathan M.	Neuropharmacology. 2018 Jun;135:412-423. doi: 10.1016/j.neuropharm.2018.03.036. Epub 2018 Mar 28.	Skosnik PD	Neuropharmacology	2018	2018-04-01	PMC6091633	NIHMS958083	10.1016/j.neuropharm.2018.03.036
29607408	Therapeutic Effects of Prolonged Cannabidiol Treatment on Psychological Symptoms and Cognitive Function in Regular Cannabis Users: A Pragmatic Open-Label Clinical Trial	Solowij N, Broyd SJ, Beale C, Prick JA, Greenwood LM, van Hell H, Suo C, Galettis P, Pai N, Fu S, Croft RJ, Martin JH, Yücel M.	Cannabis Cannabinoid Res. 2018 Mar 1;3(1):21-34. doi: 10.1089/can.2017.0043. eCollection 2018.	Solowij N	Cannabis Cannabinoid Res	2018	2018-04-03	PMC5870061		10.1089/can.2017.0043
29607409	A Novel Observational Method for Assessing Acute Responses to Cannabis: Preliminary Validation Using Legal Market Strains	Bidwell LC, Mueller R, YorkWilliams SL, Hagerty S, Bryan AD, Hutchison KE.	Cannabis Cannabinoid Res. 2018 Mar 1;3(1):35-44. doi: 10.1089/can.2017.0038. eCollection 2018.	Bidwell LC	Cannabis Cannabinoid Res	2018	2018-04-03	PMC5870063		10.1089/can.2017.0038
29607411	Verbal Memory Performance and Reduced Cortical Thickness of Brain Regions Along the Uncinate Fasciculus in Young Adult Cannabis Users	Levar N, Francis AN, Smith MJ, Ho WC, Gilman JM.	Cannabis Cannabinoid Res. 2018 Mar 1;3(1):56-65. doi: 10.1089/can.2017.0030. eCollection 2018.	Levar N	Cannabis Cannabinoid Res	2018	2018-04-03	PMC5870060		10.1089/can.2017.0030
29609727	Medical Cannabis and the Treatment of Obstructive Sleep Apnea: An American Academy of Sleep Medicine Position Statement	Ramar K, Rosen IM, Kirsch DB, Chervin RD, Carden KA, Aurora RN, Kristo DA, Malhotra RK, Martin JL, Olson EJ, Rosen CL, Rowley JA; American Academy of Sleep Medicine Board of Directors.	J Clin Sleep Med. 2018 Apr 15;14(4):679-681. doi: 10.5664/jcsm.7070.	Ramar K	J Clin Sleep Med	2018	2018-04-04	PMC5886446		10.5664/jcsm.7070
29616245	Octahydrocurcumin, a final hydrogenated metabolite of curcumin, possesses superior anti-tumor activity through induction of cellular apoptosis	Zhang Z , Luo D , Xie J , Lin G , Zhou J , Liu W , Li H , Yi T , Su Z , Chen J .	Food Funct. 2018 Apr 25;9(4):2005-2014. doi: 10.1039/c7fo02048a.	Zhang Z	Food Funct	2018	2018-04-05			10.1039/c7fo02048a
29623051	Melatonin Promotes Cheliped Regeneration, Digestive Enzyme Function, and Immunity Following Autotomy in the Chinese Mitten Crab, Eriocheir sinensis	Zhang C, Yang XZ, Xu MJ, Huang GY, Zhang Q, Cheng YX, He L, Ren HY.	Front Physiol. 2018 Mar 22;9:269. doi: 10.3389/fphys.2018.00269. eCollection 2018.	Zhang C	Front Physiol	2018	2018-04-07	PMC5875391		10.3389/fphys.2018.00269
29626744	Opioids in oral fluid of Spanish drivers	Herrera-Gómez F, García-Mingo M, Colás M, González-Luque JC, Álvarez FJ.	Drug Alcohol Depend. 2018 Jun 1;187:35-39. doi: 10.1016/j.drugalcdep.2018.02.016. Epub 2018 Mar 29.	Herrera-Gómez F	Drug Alcohol Depend	2018	2018-04-08			10.1016/j.drugalcdep.2018.02.016
29630019	Transfer of Inhaled Cannabis Into Human Breast Milk	Baker T, Datta P, Rewers-Felkins K, Thompson H, Kallem RR, Hale TW.	Obstet Gynecol. 2018 May;131(5):783-788. doi: 10.1097/AOG.0000000000002575.	Baker T	Obstet Gynecol	2018	2018-04-10			10.1097/AOG.0000000000002575
29634460	Analysis of the Uptake, Metabolism, and Behavioral Effects of Cannabinoids on Zebrafish Larvae	Achenbach JC, Hill J, Hui JPM, Morash MG, Berrue F, Ellis LD.	Zebrafish. 2018 Aug;15(4):349-360. doi: 10.1089/zeb.2017.1541. Epub 2018 Apr 10.	Achenbach JC	Zebrafish	2018	2018-04-11			10.1089/zeb.2017.1541
29635857	Effect profile of paracetamol, Δ9-THC and promethazine using an evoked pain test battery in healthy subjects	van Amerongen G, Siebenga P, de Kam ML, Hay JL, Groeneveld GJ.	Eur J Pain. 2018 Aug;22(7):1331-1342. doi: 10.1002/ejp.1222. Epub 2018 Apr 25.	van Amerongen G	Eur J Pain	2018	2018-04-11			10.1002/ejp.1222
29637590	Cannabis for Chronic Pain: Challenges and Considerations	Romero-Sandoval EA, Fincham JE, Kolano AL, Sharpe BN, Alvarado-Vázquez PA.	Pharmacotherapy. 2018 Jun;38(6):651-662. doi: 10.1002/phar.2115. Epub 2018 May 16.	Romero-Sandoval EA	Pharmacotherapy	2018	2018-04-12			10.1002/phar.2115
29648677	Excess Productivity Costs of Systemic Lupus Erythematosus, Systemic Sclerosis, and Sjögren's Syndrome: A General Population-Based Study	McCormick N, Marra CA, Sadatsafavi M, Kopec JA, Aviña-Zubieta JA.	Arthritis Care Res (Hoboken). 2019 Jan;71(1):142-154. doi: 10.1002/acr.23573.	McCormick N	Arthritis Care Res (Hoboken)	2019	2018-04-13			10.1002/acr.23573
29648861	An assessment of concurrent cannabidiol and Δ⁹-tetrahydrocannabinol administration in place aversion and taste avoidance conditioning	Hempel BJ, Clasen MM, Nelson KH, Woloshchuk CJ, Riley AL.	Exp Clin Psychopharmacol. 2018 Apr;26(2):205-213. doi: 10.1037/pha0000188.	Hempel BJ	Exp Clin Psychopharmacol	2018	2018-04-13			10.1037/pha0000188
29656267	A naturalistic examination of the perceived effects of cannabis on negative affect	Cuttler C, Spradlin A, McLaughlin RJ.	J Affect Disord. 2018 Aug 1;235:198-205. doi: 10.1016/j.jad.2018.04.054. Epub 2018 Apr 6.	Cuttler C	J Affect Disord	2018	2018-04-16			10.1016/j.jad.2018.04.054
29659126	Guanfacine decreases symptoms of cannabis withdrawal in daily cannabis smokers	Haney M, Cooper ZD, Bedi G, Herrmann E, Comer SD, Reed SC, Foltin RW, Levin FR.	Addict Biol. 2019 Jul;24(4):707-716. doi: 10.1111/adb.12621. Epub 2018 Apr 16.	Haney M	Addict Biol	2019	2018-04-17	PMC6191371	NIHMS944387	10.1111/adb.12621
29659874	Carfentanil in Impaired Driving Cases and the Importance of Drug Seizure Data	Tiscione NB, Alford I.	J Anal Toxicol. 2018 Sep 1;42(7):476-484. doi: 10.1093/jat/bky026.	Tiscione NB	J Anal Toxicol	2018	2018-04-17			10.1093/jat/bky026
29663694	Dramatic Decrease in CEST Measurement Times Using Multi-Site Excitation	Yuwen T, Kay LE, Bouvignies G.	Chemphyschem. 2018 Jul 17;19(14):1707-1710. doi: 10.1002/cphc.201800249. Epub 2018 May 24.	Yuwen T	Chemphyschem	2018	2018-04-18			10.1002/cphc.201800249
29669346	Tetrahydrocurcumin Provides Neuroprotection in Experimental Traumatic Brain Injury and the Nrf2 Signaling Pathway as a Potential Mechanism	Wei G, Chen B, Lin Q, Li Y, Luo L, He H, Fu H.	Neuroimmunomodulation. 2017;24(6):348-355. doi: 10.1159/000487998. Epub 2018 Apr 18.	Wei G	Neuroimmunomodulation	2017	2018-04-19			10.1159/000487998
29672233	Airborne exposures associated with the typical use of an aerosol brake cleaner during vehicle repair work	Fries M, Williams PRD, Ovesen J, Maier A.	J Occup Environ Hyg. 2018 Jul;15(7):531-540. doi: 10.1080/15459624.2018.1467017.	Fries M	J Occup Environ Hyg	2018	2018-04-20			10.1080/15459624.2018.1467017
29672277	Early Flow Disturbances of Tunnelled Haemodialysis Catheters and Topographic Landmarks in Chest X-Ray	Fahnert J, Stumpp P, Kahn T, Keller F, Schiekofer S, Petros S, Halbritter J, Lindner TH, Rasche FM.	Blood Purif. 2018;46(1):70-76. doi: 10.1159/000486845. Epub 2018 Apr 19.	Fahnert J	Blood Purif	2018	2018-04-20			10.1159/000486845
29674131	Efficacy of CBD-enriched medical cannabis for treatment of refractory epilepsy in children and adolescents - An observational, longitudinal study	Hausman-Kedem M, Menascu S, Kramer U.	Brain Dev. 2018 Aug;40(7):544-551. doi: 10.1016/j.braindev.2018.03.013. Epub 2018 Apr 16.	Hausman-Kedem M	Brain Dev	2018	2018-04-21			10.1016/j.braindev.2018.03.013
29679274	Analysis of the repeatability of the exhaust pollutants emission research results for cold and hot starts under controlled driving cycle conditions	Jaworski A, Kuszewski H, Ustrzycki A, Balawender K, Lejda K, Woś P.	Environ Sci Pollut Res Int. 2018 Jun;25(18):17862-17877. doi: 10.1007/s11356-018-1983-5. Epub 2018 Apr 20.	Jaworski A	Environ Sci Pollut Res Int	2018	2018-04-22	PMC6028874		10.1007/s11356-018-1983-5
29679609	Cannabis sativa (Marijuana) alters blood chemistry and the cytoarchitecture of some organs in Sprague Dawley rat models	Abey NO.	Food Chem Toxicol. 2018 Jun;116(Pt B):292-297. doi: 10.1016/j.fct.2018.04.023. Epub 2018 Apr 19.	Abey NO	Food Chem Toxicol	2018	2018-04-22			10.1016/j.fct.2018.04.023
29680489	Molecular characterization of shrimp harbinger transposase derived 1 (HARBI1)-like and its role in white spot syndrome virus and Vibrio alginolyticus infection	Sun B, Qian X, Zhu F.	Fish Shellfish Immunol. 2018 Jul;78:222-232. doi: 10.1016/j.fsi.2018.04.032. Epub 2018 Apr 19.	Sun B	Fish Shellfish Immunol	2018	2018-04-23			10.1016/j.fsi.2018.04.032
29680493	Teens, Drugs, & Vegas: Toxicological surveillance of illicit prescription and illegal drug abuse in adolescents (12-17 years) using post-mortem data in Clark County, Nevada from 2005 to 2015	Paul ABM, Simms L, Mahesan AA, Belanger EC.	J Forensic Leg Med. 2018 Aug;58:20-24. doi: 10.1016/j.jflm.2018.04.002. Epub 2018 Apr 14.	Paul ABM	J Forensic Leg Med	2018	2018-04-23			10.1016/j.jflm.2018.04.002
29682609	Prolonged Cannabidiol Treatment Effects on Hippocampal Subfield Volumes in Current Cannabis Users	Beale C, Broyd SJ, Chye Y, Suo C, Schira M, Galettis P, Martin JH, Yücel M, Solowij N.	Cannabis Cannabinoid Res. 2018 Apr 1;3(1):94-107. doi: 10.1089/can.2017.0047. eCollection 2018.	Beale C	Cannabis Cannabinoid Res	2018	2018-04-24	PMC5908414		10.1089/can.2017.0047
29683408	Palatability and oral cavity tolerability of THC:CBD oromucosal spray and possible improvement measures in multiple sclerosis patients with resistant spasticity: a pilot study	Lus G, Cantello R, Danni MC, Rini A, Sarchielli P, Tassinari T, Signoriello E.	Neurodegener Dis Manag. 2018 Apr;8(2):105-113. doi: 10.2217/nmt-2017-0056. Epub 2018 Apr 23.	Lus G	Neurodegener Dis Manag	2018	2018-04-24			10.2217/nmt-2017-0056
29688694	In Situ Determination of Illegal Drugs in Oral Fluid by Portable Capillary Electrophoresis with Deep UV Excited Fluorescence Detection	Saar-Reismaa P, Erme E, Vaher M, Kulp M, Kaljurand M, Mazina-Šinkar J.	Anal Chem. 2018 May 15;90(10):6253-6258. doi: 10.1021/acs.analchem.8b00911. Epub 2018 May 4.	Saar-Reismaa P	Anal Chem	2018	2018-04-25			10.1021/acs.analchem.8b00911
29689453	Cross-talk of cannabinoid and endocannabinoid metabolism is mediated via human cardiac CYP2J2	Arnold WR, Weigle AT, Das A.	J Inorg Biochem. 2018 Jul;184:88-99. doi: 10.1016/j.jinorgbio.2018.03.016. Epub 2018 Apr 7.	Arnold WR	J Inorg Biochem	2018	2018-04-25	PMC5964033	NIHMS960764	10.1016/j.jinorgbio.2018.03.016
29689485	The effect of high-dose dronabinol (oral THC) maintenance on cannabis self-administration	Schlienz NJ, Lee DC, Stitzer ML, Vandrey R.	Drug Alcohol Depend. 2018 Jun 1;187:254-260. doi: 10.1016/j.drugalcdep.2018.02.022. Epub 2018 Apr 17.	Schlienz NJ	Drug Alcohol Depend	2018	2018-04-25	PMC5959782	NIHMS961368	10.1016/j.drugalcdep.2018.02.022
29689635	The pharmacokinetics and tissue distribution of curcumin and its metabolites in mice	Wang J, Yu X, Zhang L, Wang L, Peng Z, Chen Y.	Biomed Chromatogr. 2018 Apr 24:e4267. doi: 10.1002/bmc.4267. Online ahead of print.	Wang J	Biomed Chromatogr	2018	2018-04-25			10.1002/bmc.4267
29691375	THC exposure of human iPSC neurons impacts genes associated with neuropsychiatric disorders	Guennewig B, Bitar M, Obiorah I, Hanks J, O'Brien EA, Kaczorowski DC, Hurd YL, Roussos P, Brennand KJ, Barry G.	Transl Psychiatry. 2018 Apr 25;8(1):89. doi: 10.1038/s41398-018-0137-3.	Guennewig B	Transl Psychiatry	2018	2018-04-26	PMC5915454		10.1038/s41398-018-0137-3
29698894	Biological correlates of self-reported new and continued abstinence in cannabis cessation treatment clinical trials	Baker NL, Gray KM, Sherman BJ, Morella K, Sahlem GL, Wagner AM, McRae-Clark AL.	Drug Alcohol Depend. 2018 Jun 1;187:270-277. doi: 10.1016/j.drugalcdep.2018.03.017. Epub 2018 Apr 16.	Baker NL	Drug Alcohol Depend	2018	2018-04-27	PMC5959795	NIHMS962649	10.1016/j.drugalcdep.2018.03.017
29701252	Cannabis, from plant to pill	Grof CPL.	Br J Clin Pharmacol. 2018 Nov;84(11):2463-2467. doi: 10.1111/bcp.13618. Epub 2018 May 24.	Grof CPL	Br J Clin Pharmacol	2018	2018-04-28	PMC6177712		10.1111/bcp.13618
29709847	Big data on a big new market: Insights from Washington State's legal cannabis market	Caulkins JP, Bao Y, Davenport S, Fahli I, Guo Y, Kinnard K, Najewicz M, Renaud L, Kilmer B.	Int J Drug Policy. 2018 Jul;57:86-94. doi: 10.1016/j.drugpo.2018.03.031. Epub 2018 Apr 27.	Caulkins JP	Int J Drug Policy	2018	2018-05-01	PMC6948109	NIHMS1062628	10.1016/j.drugpo.2018.03.031
29713172	Gender-specific association of functional prodynorphin 68 bp repeats with cannabis exposure in an African American cohort	Yuferov V, Butelman ER, Kreek MJ.	Neuropsychiatr Dis Treat. 2018 Apr 16;14:1025-1034. doi: 10.2147/NDT.S159954. eCollection 2018.	Yuferov V	Neuropsychiatr Dis Treat	2018	2018-05-02	PMC5909790		10.2147/NDT.S159954
29718956	A reliable and validated LC-MS/MS method for the simultaneous quantification of 4 cannabinoids in 40 consumer products	Meng Q, Buchanan B, Zuccolo J, Poulin MM, Gabriele J, Baranowski DC.	PLoS One. 2018 May 2;13(5):e0196396. doi: 10.1371/journal.pone.0196396. eCollection 2018.	Meng Q	PLoS One	2018	2018-05-03	PMC5931681		10.1371/journal.pone.0196396
29730318	A real time screening assay for cannabinoid CB1 receptor-mediated signaling	Andersen HK, Piroli GG, Walsh KB.	J Pharmacol Toxicol Methods. 2018 Nov-Dec;94(Pt 1):44-49. doi: 10.1016/j.vascn.2018.05.001. Epub 2018 May 4.	Andersen HK	J Pharmacol Toxicol Methods	2018	2018-05-07			10.1016/j.vascn.2018.05.001
29735812	The Impact of Δ9-THC on the Psychological Symptoms of Anorexia Nervosa: A Pilot Study	Avraham Y, Latzer Y, Hasid D, Berry EM.	Isr J Psychiatry. 2017;54(3):44-51.	Avraham Y	Isr J Psychiatry	2017	2018-05-09
29745328	Non-fatal Overdose with U-47700: Identification in Biological Matrices	Vogliardi S, Stocchero G, Maietti S, Tucci M, Nalesso A, Snenghi R, Favretto D.	Curr Pharm Biotechnol. 2018;19(2):180-187. doi: 10.2174/1389201019666180509164240.	Vogliardi S	Curr Pharm Biotechnol	2018	2018-05-11			10.2174/1389201019666180509164240
29748983	Hyaluronic Acid-Modified Porous Silicon Films for the Electrochemical Sensing of Bacterial Hyaluronidase	Tücking KS, Vasani RB, Cavallaro AA, Voelcker NH, Schönherr H, Prieto-Simon B.	Macromol Rapid Commun. 2018 Oct;39(19):e1800178. doi: 10.1002/marc.201800178. Epub 2018 May 11.	Tücking KS	Macromol Rapid Commun	2018	2018-05-12			10.1002/marc.201800178
29749024	Determining the effects of adulterants on drug detection via enzyme-linked immunosorbent assay and adulterant tests strips	Olivieri B, Marić M, Bridge C.	Drug Test Anal. 2018 Sep;10(9):1383-1393. doi: 10.1002/dta.2404. Epub 2018 Jun 11.	Olivieri B	Drug Test Anal	2018	2018-05-12			10.1002/dta.2404
29750976	Reduced type III neuregulin 1 expression does not modulate the behavioural sensitivity of mice to acute Δ(9)-tetrahydrocannabinol (D(9)-THC)	Lloyd D, Talmage D, Shannon Weickert C, Karl T.	Pharmacol Biochem Behav. 2018 Jul;170:64-70. doi: 10.1016/j.pbb.2018.05.003. Epub 2018 May 8.	Lloyd D	Pharmacol Biochem Behav	2018	2018-05-12			10.1016/j.pbb.2018.05.003
29752828	Cannabis smoking impairs driving performance on the simulator and real driving: a randomized, double-blind, placebo-controlled, crossover trial	Micallef J, Dupouey J, Jouve E, Truillet R, Lacarelle B, Taillard J, Daurat A, Authié C, Blin O, Rascol O, Philip P, Mestre D.	Fundam Clin Pharmacol. 2018 Oct;32(5):558-570. doi: 10.1111/fcp.12382. Epub 2018 Jun 6.	Micallef J	Fundam Clin Pharmacol	2018	2018-05-13			10.1111/fcp.12382
29753185	US-guided Diffuse Optical Tomography: Clinicopathological Features Affect Total Hemoglobin Concentration in Breast Cancer	Zhi W, Wang Y, Chang C, Wang F, Chen Y, Hu N, Zhu X, Xie L.	Transl Oncol. 2018 Aug;11(4):845-851. doi: 10.1016/j.tranon.2018.04.009. Epub 2018 May 9.	Zhi W	Transl Oncol	2018	2018-05-13	PMC6051956		10.1016/j.tranon.2018.04.009
29754050	Sargassum wightii-synthesized ZnO nanoparticles - from antibacterial and insecticidal activity to immunostimulatory effects on the green tiger shrimp Penaeus semisulcatus	Ishwarya R, Vaseeharan B, Subbaiah S, Nazar AK, Govindarajan M, Alharbi NS, Kadaikunnan S, Khaled JM, Al-Anbr MN.	J Photochem Photobiol B. 2018 Jun;183:318-330. doi: 10.1016/j.jphotobiol.2018.04.049. Epub 2018 May 3.	Ishwarya R	J Photochem Photobiol B	2018	2018-05-14			10.1016/j.jphotobiol.2018.04.049
29757806	Medical Cannabis for the Treatment of Fibromyalgia	Crestani F.	J Clin Rheumatol. 2018 Aug;24(5):281. doi: 10.1097/RHU.0000000000000823.	Crestani F	J Clin Rheumatol	2018	2018-05-15			10.1097/RHU.0000000000000823
29758385	Evaluation of reinforcing and aversive effects of voluntary Δ(9)-tetrahydrocannabinol ingestion in rats	Barrus DG, Lefever TW, Wiley JL.	Neuropharmacology. 2018 Jul 15;137:133-140. doi: 10.1016/j.neuropharm.2018.04.018. Epub 2018 May 3.	Barrus DG	Neuropharmacology	2018	2018-05-15	PMC6278827	NIHMS996646	10.1016/j.neuropharm.2018.04.018
29760713	Human Leukocyte Antigen-Class I Alleles and the Autoreactive T Cell Response in Psoriasis Pathogenesis	Prinz JC.	Front Immunol. 2018 Apr 30;9:954. doi: 10.3389/fimmu.2018.00954. eCollection 2018.	Prinz JC	Front Immunol	2018	2018-05-16	PMC5936982		10.3389/fimmu.2018.00954
29761015	The influence of THC:CBD oromucosal spray on driving ability in patients with multiple sclerosis-related spasticity	Celius EG, Vila C.	Brain Behav. 2018 Apr 6;8(5):e00962. doi: 10.1002/brb3.962. eCollection 2018 May.	Celius EG	Brain Behav	2018	2018-05-16	PMC5943754		10.1002/brb3.962
29766770	MRI-Guided Thrombolysis for Stroke with Unknown Time of Onset	Thomalla G, Simonsen CZ, Boutitie F, Andersen G, Berthezene Y, Cheng B, Cheripelli B, Cho TH, Fazekas F, Fiehler J, Ford I, Galinovic I, Gellissen S, Golsari A, Gregori J, Günther M, Guibernau J, Häusler KG, Hennerici M, Kemmling A, Marstrand J, Modrau B, Neeb L, Perez de la Ossa N, Puig J, Ringleb P, Roy P, Scheel E, Schonewille W, Serena J, Sunaert S, Villringer K, Wouters A, Thijs V, Ebinger M…	N Engl J Med. 2018 Aug 16;379(7):611-622. doi: 10.1056/NEJMoa1804355. Epub 2018 May 16.	Thomalla G	N Engl J Med	2018	2018-05-17			10.1056/NEJMoa1804355
29768651	Cannabinoid Hyperemesis Syndrome: Reports of Fatal Cases	Nourbakhsh M, Miller A, Gofton J, Jones G, Adeagbo B.	J Forensic Sci. 2019 Jan;64(1):270-274. doi: 10.1111/1556-4029.13819. Epub 2018 May 16.	Nourbakhsh M	J Forensic Sci	2019	2018-05-17			10.1111/1556-4029.13819
29775921	Toxicological investigation in blood samples from suspected impaired driving cases in the Milan area: Possible loss of evidence due to late blood sampling	Ferrari D, Manca M, Premaschi S, Banfi G, Locatelli M.	Forensic Sci Int. 2018 Jul;288:211-217. doi: 10.1016/j.forsciint.2018.04.038. Epub 2018 May 1.	Ferrari D	Forensic Sci Int	2018	2018-05-19			10.1016/j.forsciint.2018.04.038
29776015	Delta-9-tetrahydrocannabinol potentiates fear memory salience through functional modulation of mesolimbic dopaminergic activity states	Fitoussi A, Zunder J, Tan H, Laviolette SR.	Eur J Neurosci. 2018 Jun;47(11):1385-1400. doi: 10.1111/ejn.13951.	Fitoussi A	Eur J Neurosci	2018	2018-05-19			10.1111/ejn.13951
29776349	Randomised Controlled Trial (RCT) of cannabinoid replacement therapy (Nabiximols) for the management of treatment-resistant cannabis dependent patients: a study protocol	Bhardwaj AK, Allsop DJ, Copeland J, McGregor IS, Dunlop A, Shanahan M, Bruno R, Phung N, Montebello M, Sadler C, Gugusheff J, Jackson M, Luksza J, Lintzeris N; Agonist Replacement for Cannabis Dependence (ARCD) study group.	BMC Psychiatry. 2018 May 18;18(1):140. doi: 10.1186/s12888-018-1682-2.	Bhardwaj AK	BMC Psychiatry	2018	2018-05-20	PMC5960200		10.1186/s12888-018-1682-2
29778658	Marijuana and Lung Disease	Tashkin DP.	Chest. 2018 Sep;154(3):653-663. doi: 10.1016/j.chest.2018.05.005. Epub 2018 May 17.	Tashkin DP	Chest	2018	2018-05-21			10.1016/j.chest.2018.05.005
29786643	Controlled-Deactivation CB1 Receptor Ligands as a Novel Strategy to Lower Intraocular Pressure	Miller S, Kulkarni S, Ciesielski A, Nikas SP, Mackie K, Makriyannis A, Straiker A.	Pharmaceuticals (Basel). 2018 May 22;11(2):50. doi: 10.3390/ph11020050.	Miller S	Pharmaceuticals (Basel)	2018	2018-05-23	PMC6027315		10.3390/ph11020050
29787529	Motor vehicle crash fatalaties and undercompensated care associated with legalization of marijuana	Steinemann S, Galanis D, Nguyen T, Biffl W.	J Trauma Acute Care Surg. 2018 Sep;85(3):566-571. doi: 10.1097/TA.0000000000001983.	Steinemann S	J Trauma Acute Care Surg	2018	2018-05-23			10.1097/TA.0000000000001983
29787777	Examination of the effects of cannabinoid ligands on decision making in a rat gambling task	Ferland JN, Carr MR, Lee AM, Hoogeland ME, Winstanley CA, Pattij T.	Pharmacol Biochem Behav. 2018 Jul;170:87-97. doi: 10.1016/j.pbb.2018.05.012. Epub 2018 May 19.	Ferland JN	Pharmacol Biochem Behav	2018	2018-05-23			10.1016/j.pbb.2018.05.012
29797104	Patterns of medicinal cannabis use, strain analysis, and substitution effect among patients with migraine, headache, arthritis, and chronic pain in a medicinal cannabis cohort	Baron EP, Lucas P, Eades J, Hogue O.	J Headache Pain. 2018 May 24;19(1):37. doi: 10.1186/s10194-018-0862-2.	Baron EP	J Headache Pain	2018	2018-05-26	PMC5968020		10.1186/s10194-018-0862-2
29800660	Lactose-crosslinked fish gelatin-based porous scaffolds embedded with tetrahydrocurcumin for cartilage regeneration	Etxabide A, Ribeiro RDC, Guerrero P, Ferreira AM, Stafford GP, Dalgarno K, de la Caba K, Gentile P.	Int J Biol Macromol. 2018 Oct 1;117:199-208. doi: 10.1016/j.ijbiomac.2018.05.154. Epub 2018 May 23.	Etxabide A	Int J Biol Macromol	2018	2018-05-26			10.1016/j.ijbiomac.2018.05.154
29802594	Cannabinoid-induced alteration of motor-evoked potentials (MEPs) prior to intradural spinal tumor removal: a nasty surprise	Pralong E, Maduri R, Daniel RT, Messerer M.	Childs Nerv Syst. 2018 Jul;34(7):1287-1289. doi: 10.1007/s00381-018-3830-x. Epub 2018 May 25.	Pralong E	Childs Nerv Syst	2018	2018-05-27			10.1007/s00381-018-3830-x
29805193	Determination of optical properties, drug concentration, and tissue oxygenation in human pleural tissue before and after Photofrin-mediated photodynamic therapy	Ong YH, Padawer-Curry J, Finlay JC, Kim MM, Dimofte A, Cengel K, Zhu TC.	Proc SPIE Int Soc Opt Eng. 2018 Mar;10476:104760Y. doi: 10.1117/12.2290727.	Ong YH	Proc SPIE Int Soc Opt Eng	2018	2018-05-29	PMC5967642	NIHMS966061	10.1117/12.2290727
29805589	∆9-tetrahydrocannabinol inhibits epithelial-mesenchymal transition and metastasis by targeting matrix metalloproteinase-9 in endometrial cancer	Zhang Y, Zheng W, Shen K, Shen W.	Oncol Lett. 2018 Jun;15(6):8527-8535. doi: 10.3892/ol.2018.8407. Epub 2018 Apr 2.	Zhang Y	Oncol Lett	2018	2018-05-29	PMC5950514		10.3892/ol.2018.8407
29807027	Ventilatory-depressant effects of opioids alone and in combination with cannabinoids in rhesus monkeys	Weed PF, Gerak LR, France CP.	Eur J Pharmacol. 2018 Aug 15;833:94-99. doi: 10.1016/j.ejphar.2018.05.041. Epub 2018 May 26.	Weed PF	Eur J Pharmacol	2018	2018-05-29	PMC6057806	NIHMS972842	10.1016/j.ejphar.2018.05.041
29808676	Th-Based Endohedral Metallofullerenes: Anomalous Metal Position and Significant Metal-Cage Covalent Interactions with the Involvement of Th 5f Orbitals	Li Y, Yang L, Liu C, Hou Q, Jin P, Lu X.	Inorg Chem. 2018 Jun 18;57(12):7142-7150. doi: 10.1021/acs.inorgchem.8b00866. Epub 2018 May 29.	Li Y	Inorg Chem	2018	2018-05-30			10.1021/acs.inorgchem.8b00866
29843260	Is Breast Best? Examining the effects of alcohol and cannabis use during lactation	Brown RA, Dakkak H, Seabrook JA.	J Neonatal Perinatal Med. 2018;11(4):345-356. doi: 10.3233/NPM-17125.	Brown RA	J Neonatal Perinatal Med	2018	2018-05-31			10.3233/NPM-17125
29844076	Letter by Löwe et al Regarding Article, "Low-Density Lipoprotein Cholesterol Lowering for the Primary Prevention of Cardiovascular Disease Among Men With Primary Elevations of Low-Density Lipoprotein Cholesterol Levels of 190 mg/dL or Above: Analyses From the WOSCOPS (West of Scotland Coronary Prevention Study) 5-Year Randomized Trial and 20-Year Observational Follow-Up"	Löwe AL, Collet TH, Rodondi N.	Circulation. 2018 May 29;137(22):2415-2416. doi: 10.1161/CIRCULATIONAHA.117.032213.	Löwe AL	Circulation	2018	2018-05-31			10.1161/CIRCULATIONAHA.117.032213
29845743	Proof of active cannabis use comparing 11-hydroxy-∆9-tetrahydrocannabinol with 11-nor-9-carboxy-tetrahydrocannabinol concentrations	Franz T, Skopp G, Schwarz G, Musshoff F.	Drug Test Anal. 2018 Oct;10(10):1573-1578. doi: 10.1002/dta.2415. Epub 2018 Jul 10.	Franz T	Drug Test Anal	2018	2018-05-31			10.1002/dta.2415
29845778	Including cannabinoids in the treatment of painful schwannomatosis	Iorno V, Roberto A, Colantonio LB, Landi L, Corli O.	Brain Behav. 2018 Jul;8(7):e01011. doi: 10.1002/brb3.1011. Epub 2018 May 29.	Iorno V	Brain Behav	2018	2018-05-31	PMC6043707		10.1002/brb3.1011
29857317	Initiation of vaporizing cannabis: Individual and social network predictors in a longitudinal study of young adults	Cassidy RN, Meisel MK, DiGuiseppi G, Balestrieri S, Barnett NP.	Drug Alcohol Depend. 2018 Jul 1;188:334-340. doi: 10.1016/j.drugalcdep.2018.04.014. Epub 2018 May 19.	Cassidy RN	Drug Alcohol Depend	2018	2018-06-02	PMC5999573	NIHMS969337	10.1016/j.drugalcdep.2018.04.014
29859127	How patients with gout become engaged in disease management: a constructivist grounded theory study	Howren A, Cox SM, Shojania K, Rai SK, Choi HK, De Vera MA.	Arthritis Res Ther. 2018 Jun 1;20(1):110. doi: 10.1186/s13075-018-1608-x.	Howren A	Arthritis Res Ther	2018	2018-06-03	PMC5984761		10.1186/s13075-018-1608-x
29861097	A Model of Δ(9)-Tetrahydrocannabinol Self-administration and Reinstatement That Alters Synaptic Plasticity in Nucleus Accumbens	Spencer S, Neuhofer D, Chioma VC, Garcia-Keller C, Schwartz DJ, Allen N, Scofield MD, Ortiz-Ithier T, Kalivas PW.	Biol Psychiatry. 2018 Oct 15;84(8):601-610. doi: 10.1016/j.biopsych.2018.04.016. Epub 2018 May 3.	Spencer S	Biol Psychiatry	2018	2018-06-05	PMC6162175	NIHMS969758	10.1016/j.biopsych.2018.04.016
29863387	Influence of tiagabine maintenance on cannabis effects and related behaviors in daily cannabis users	Wesley MJ, Westgate PM, Stoops WW, Kelly TH, Hays LR, Lile JA.	Exp Clin Psychopharmacol. 2018 Jun;26(3):310-319. doi: 10.1037/pha0000180.	Wesley MJ	Exp Clin Psychopharmacol	2018	2018-06-05	PMC5990026	NIHMS928112	10.1037/pha0000180
29865166	Irinotecan and Δ⁸-Tetrahydrocannabinol Interactions in Rat Liver: A Preliminary Evaluation Using Biochemical and Genotoxicity Markers	Lucić Vrdoljak A, Fuchs N, Mikolić A, Žunec S, Brčić Karačonji I, Jurič A, Prester L, Micek V, Neuberg M, Čanović S, Mršić G, Kopjar N.	Molecules. 2018 Jun 1;23(6):1332. doi: 10.3390/molecules23061332.	Lucić Vrdoljak A	Molecules	2018	2018-06-06	PMC6100385		10.3390/molecules23061332
29867351	Cannabinoids in Glioblastoma Therapy: New Applications for Old Drugs	Dumitru CA, Sandalcioglu IE, Karsak M.	Front Mol Neurosci. 2018 May 16;11:159. doi: 10.3389/fnmol.2018.00159. eCollection 2018.	Dumitru CA	Front Mol Neurosci	2018	2018-06-06	PMC5964193		10.3389/fnmol.2018.00159
29876791	Systemic Injections of Cannabidiol Enhance Acetylcholine Levels from Basal Forebrain in Rats	Murillo-Rodríguez E, Arankowsky-Sandoval G, Rocha NB, Peniche-Amante R, Veras AB, Machado S, Budde H.	Neurochem Res. 2018 Aug;43(8):1511-1518. doi: 10.1007/s11064-018-2565-0. Epub 2018 Jun 6.	Murillo-Rodríguez E	Neurochem Res	2018	2018-06-08			10.1007/s11064-018-2565-0
29879231	The association of fatigue, pain, depression and anxiety with work and activity impairment in immune mediated inflammatory diseases	Enns MW, Bernstein CN, Kroeker K, Graff L, Walker JR, Lix LM, Hitchon CA, El-Gabalawy R, Fisk JD, Marrie RA; CIHR Team in Defining the Burden and Managing the Effects of Psychiatric Comorbidity in Chronic Immunoinflammatory Disease.	PLoS One. 2018 Jun 7;13(6):e0198975. doi: 10.1371/journal.pone.0198975. eCollection 2018.	Enns MW	PLoS One	2018	2018-06-08	PMC5991721		10.1371/journal.pone.0198975
29884456	Δ(9)-Tetrahydrocannabinol at Retrieval Drives False Recollection of Neutral and Emotional Memories	Doss MK, Weafer J, Gallo DA, de Wit H.	Biol Psychiatry. 2018 Nov 15;84(10):743-750. doi: 10.1016/j.biopsych.2018.04.020. Epub 2018 May 9.	Doss MK	Biol Psychiatry	2018	2018-06-10			10.1016/j.biopsych.2018.04.020
29885152	Recent Self-Reported Cannabis Use Is Associated With the Biometrics of Delta-9-Tetrahydrocannabinol	Smith MJ, Alden EC, Herrold AA, Roberts A, Stern D, Jones J, Barnes A, O'Connor KP, Huestis MA, Breiter HC.	J Stud Alcohol Drugs. 2018 May;79(3):441-446. doi: 10.15288/jsad.2018.79.441.	Smith MJ	J Stud Alcohol Drugs	2018	2018-06-10	PMC6005260		10.15288/jsad.2018.79.441
29885594	Agricultural innovations in Morocco's cannabis industry	Chouvy PA, Macfarlane J.	Int J Drug Policy. 2018 Aug;58:85-91. doi: 10.1016/j.drugpo.2018.04.013. Epub 2018 Jun 7.	Chouvy PA	Int J Drug Policy	2018	2018-06-10			10.1016/j.drugpo.2018.04.013
29886251	A cannabinoid receptor 2 agonist reduces blood-brain barrier damage via induction of MKP-1 after intracerebral hemorrhage in rats	Li L, Yun D, Zhang Y, Tao Y, Tan Q, Qiao F, Luo B, Liu Y, Fan R, Xian J, Yu A.	Brain Res. 2018 Oct 15;1697:113-123. doi: 10.1016/j.brainres.2018.06.006. Epub 2018 Jun 7.	Li L	Brain Res	2018	2018-06-11			10.1016/j.brainres.2018.06.006
29887287	Probing the endocannabinoid system in healthy volunteers: Cannabidiol alters fronto-striatal resting-state connectivity	Grimm O, Löffler M, Kamping S, Hartmann A, Rohleder C, Leweke M, Flor H.	Eur Neuropsychopharmacol. 2018 Jul;28(7):841-849. doi: 10.1016/j.euroneuro.2018.04.004. Epub 2018 Jun 7.	Grimm O	Eur Neuropsychopharmacol	2018	2018-06-12			10.1016/j.euroneuro.2018.04.004
29907926	Effects of Δ9-THC and cannabidiol vapor inhalation in male and female rats	Javadi-Paydar M, Nguyen JD, Kerr TM, Grant Y, Vandewater SA, Cole M, Taffe MA.	Psychopharmacology (Berl). 2018 Sep;235(9):2541-2557. doi: 10.1007/s00213-018-4946-0. Epub 2018 Jun 16.	Javadi-Paydar M	Psychopharmacology (Berl)	2018	2018-06-17	PMC6699758	NIHMS1046258	10.1007/s00213-018-4946-0
29923025	Cannabinoids for Treatment of MS Symptoms: State of the Evidence	Rice J, Cameron M.	Curr Neurol Neurosci Rep. 2018 Jun 19;18(8):50. doi: 10.1007/s11910-018-0859-x.	Rice J	Curr Neurol Neurosci Rep	2018	2018-06-21			10.1007/s11910-018-0859-x
29927625	Roadside survey of alcohol and drug use among Norwegian drivers in 2016-2017: A follow-up of the 2008-2009 survey	Furuhaugen H, Jamt REG, Nilsson G, Vindenes V, Gjerde H.	Traffic Inj Prev. 2018;19(6):555-562. doi: 10.1080/15389588.2018.1478087. Epub 2018 Sep 25.	Furuhaugen H	Traffic Inj Prev	2018	2018-06-22			10.1080/15389588.2018.1478087
29928919	The psychoactive substance of cannabis Δ9-tetrahydrocannabinol (THC) negatively regulates CFTR in airway cells	Chang SW, Wellmerling J, Zhang X, Rayner RE, Osman W, Mertz S, Amer AO, Peeples ME, Boyaka PN, Cormet-Boyaka E.	Biochim Biophys Acta Gen Subj. 2018 Sep;1862(9):1988-1994. doi: 10.1016/j.bbagen.2018.06.008. Epub 2018 Jun 19.	Chang SW	Biochim Biophys Acta Gen Subj	2018	2018-06-22			10.1016/j.bbagen.2018.06.008
29929117	Psychiatric comorbidity increases mortality in immune-mediated inflammatory diseases	Marrie RA, Walld R, Bolton JM, Sareen J, Patten SB, Singer A, Lix LM, Hitchon CA, El-Gabalawy R, Katz A, Fisk JD, Bernstein CN; CIHR Team in Defining the Burden and Managing the Effects of Psychiatric Comorbidity in Chronic Immunoinflammatory Disease.	Gen Hosp Psychiatry. 2018 Jul-Aug;53:65-72. doi: 10.1016/j.genhosppsych.2018.06.001. Epub 2018 Jun 7.	Marrie RA	Gen Hosp Psychiatry	2018	2018-06-22			10.1016/j.genhosppsych.2018.06.001
29933552	Pain Modulation after Oromucosal Cannabinoid Spray (SATIVEX(®)) in Patients with Multiple Sclerosis: A Study with Quantitative Sensory Testing and Laser-Evoked Potentials	Turri M, Teatini F, Donato F, Zanette G, Tugnoli V, Deotto L, Bonetti B, Squintani G.	Medicines (Basel). 2018 Jun 21;5(3):59. doi: 10.3390/medicines5030059.	Turri M	Medicines (Basel)	2018	2018-06-24	PMC6163235		10.3390/medicines5030059
29935939	Modulation of acute effects of delta-9-tetrahydrocannabinol on psychotomimetic effects, cognition and brain function by previous cannabis exposure	Colizzi M, McGuire P, Giampietro V, Williams S, Brammer M, Bhattacharyya S.	Eur Neuropsychopharmacol. 2018 Jul;28(7):850-862. doi: 10.1016/j.euroneuro.2018.04.003. Epub 2018 Jun 21.	Colizzi M	Eur Neuropsychopharmacol	2018	2018-06-25			10.1016/j.euroneuro.2018.04.003
29936119	Effect of repeated juvenile exposure to Δ9‑tetrahydrocannabinol on anxiety-related behavior and social interactions in adolescent rats	Mohammed AN, Alugubelly N, Kaplan BL, Carr RL.	Neurotoxicol Teratol. 2018 Sep-Oct;69:11-20. doi: 10.1016/j.ntt.2018.06.003. Epub 2018 Jun 21.	Mohammed AN	Neurotoxicol Teratol	2018	2018-06-25			10.1016/j.ntt.2018.06.003
29936369	Implementation of a generic SFC-MS method for the quality control of potentially counterfeited medicinal cannabis with synthetic cannabinoids	Jambo H, Dispas A, Avohou HT, André S, Hubert C, Lebrun P, Ziemons É, Hubert P.	J Chromatogr B Analyt Technol Biomed Life Sci. 2018 Aug 15;1092:332-342. doi: 10.1016/j.jchromb.2018.05.049. Epub 2018 Jun 5.	Jambo H	J Chromatogr B Analyt Technol Biomed Life Sci	2018	2018-06-25			10.1016/j.jchromb.2018.05.049
29940172	Appraising the "entourage effect": Antitumor action of a pure cannabinoid versus a botanical drug preparation in preclinical models of breast cancer	Blasco-Benito S, Seijo-Vila M, Caro-Villalobos M, Tundidor I, Andradas C, García-Taboada E, Wade J, Smith S, Guzmán M, Pérez-Gómez E, Gordon M, Sánchez C.	Biochem Pharmacol. 2018 Nov;157:285-293. doi: 10.1016/j.bcp.2018.06.025. Epub 2018 Jun 27.	Blasco-Benito S	Biochem Pharmacol	2018	2018-06-26			10.1016/j.bcp.2018.06.025
29941333	Hepatotoxicity upon using niacin to pass a drug test: A case report	Durham SH, Covington EW, Clemmons KJ.	J Am Pharm Assoc (2003). 2018 Sep-Oct;58(5):564-567. doi: 10.1016/j.japh.2018.04.033. Epub 2018 Jun 23.	Durham SH	J Am Pharm Assoc (2003)	2018	2018-06-27			10.1016/j.japh.2018.04.033
29943977	High-Resolution Ion Mobility Spectrometry for Rapid Cannabis Potency Testing	Hädener M, Kamrath MZ, Weinmann W, Groessl M.	Anal Chem. 2018 Aug 7;90(15):8764-8768. doi: 10.1021/acs.analchem.8b02180. Epub 2018 Jul 10.	Hädener M	Anal Chem	2018	2018-06-27			10.1021/acs.analchem.8b02180
29947572	A single dose of cocaine enhances prospective memory performance	Hutten NR, Kuypers KP, van Wel JH, Theunissen EL, Toennes SW, Verkes RJ, Ramaekers JG.	J Psychopharmacol. 2018 Aug;32(8):883-892. doi: 10.1177/0269881118783299. Epub 2018 Jun 27.	Hutten NR	J Psychopharmacol	2018	2018-06-28	PMC6058404		10.1177/0269881118783299
29948504	Quantification of Inflammasome Adaptor Protein ASC in Biological Samples by Multiple-Reaction Monitoring Mass Spectrometry	Ulke-Lemée A, Lau A, Nelson MC, James MT, Muruve DA, MacDonald JA.	Inflammation. 2018 Aug;41(4):1396-1408. doi: 10.1007/s10753-018-0787-6.	Ulke-Lemée A	Inflammation	2018	2018-06-28			10.1007/s10753-018-0787-6
29948698	Effect of anhydrous ethanol/gasoline blends on performance and exhaust emissions of spark-ignited non-road engines	Ribeiro CB, Martins KG, Gueri MVD, Pavanello GP, Schirmer WN.	Environ Sci Pollut Res Int. 2018 Aug;25(24):24192-24200. doi: 10.1007/s11356-018-2476-2. Epub 2018 Jun 12.	Ribeiro CB	Environ Sci Pollut Res Int	2018	2018-06-28			10.1007/s11356-018-2476-2
29948708	Polycyclic aromatic hydrocarbons, phthalates, parabens and other environmental contaminants in dust and suspended particulates of Algiers, Algeria	Rabhi L, Lemou A, Cecinato A, Balducci C, Cherifi N, Ladji R, Yassaa N.	Environ Sci Pollut Res Int. 2018 Aug;25(24):24253-24265. doi: 10.1007/s11356-018-2496-y. Epub 2018 Jun 13.	Rabhi L	Environ Sci Pollut Res Int	2018	2018-06-28			10.1007/s11356-018-2496-y
29949807	Quantitative Criteria to Screen for Cannabis Use Disorder	Casajuana C, López-Pelayo H, Miquel L, Balcells-Oliveró MM, Colom J, Gual A.	Eur Addict Res. 2018;24(3):109-117. doi: 10.1159/000488346. Epub 2018 Jun 27.	Casajuana C	Eur Addict Res	2018	2018-06-28			10.1159/000488346
29954632	Commercial cannabis consumer products part 1: GC-MS qualitative analysis of cannabis cannabinoids	Ciolino LA, Ranieri TL, Taylor AM.	Forensic Sci Int. 2018 Aug;289:429-437. doi: 10.1016/j.forsciint.2018.05.032. Epub 2018 Jun 6.	Ciolino LA	Forensic Sci Int	2018	2018-06-30			10.1016/j.forsciint.2018.05.032
29955495	Evidence for the use of "medical marijuana" in psychiatric and neurologic disorders	Noel C.	Ment Health Clin. 2018 Mar 23;7(1):29-38. doi: 10.9740/mhc.2017.01.029. eCollection 2017 Jan.	Noel C	Ment Health Clin	2018	2018-06-30	PMC6007658		10.9740/mhc.2017.01.029
29955732	Multi-laboratory validation of a Δ9-tetrahydrocannabinol LC-MS/MS test kit designed for quantifying THC and marijuana metabolites in blood	Patton AL, Jones JO, Nord A, Eversole DW, Feazell EE, Mauldin K, Li L, Williams LD, Bai S, Channell K, Endres G, Gamette M, Moran JH.	Forensic Sci Criminol. 2018;3(1):10.15761/FSC.1000125. doi: 10.15761/FSC.1000125. Epub 2018 Mar 28.	Patton AL	Forensic Sci Criminol	2018	2018-06-30	PMC6016857	NIHMS962232	10.15761/FSC.1000125
29956703	Detection of exogenous substances in latent fingermarks by silver-assisted LDI imaging MS: perspectives in forensic sciences	Lauzon N , Chaurand P .	Analyst. 2018 Jul 23;143(15):3586-3594. doi: 10.1039/c8an00688a.	Lauzon N	Analyst	2018	2018-06-30			10.1039/c8an00688a
29958511	Myocardial Infarct After Marijuana Inhalation in a 16-year-old Adolescent Boy	Toce MS, Farias M, Powell AJ, Daly KP, Vargas SO, Burns MM.	Pediatr Dev Pathol. 2019 Jan-Feb;22(1):80-86. doi: 10.1177/1093526618785552. Epub 2018 Jun 29.	Toce MS	Pediatr Dev Pathol	2019	2018-07-01			10.1177/1093526618785552
29960257	A fast and reliable method for quantitation of THC and its 2 main metabolites in whole blood by GC-MS/MS (TQD)	Castro AL, Tarelho S, Melo P, Franco JM.	Forensic Sci Int. 2018 Aug;289:344-351. doi: 10.1016/j.forsciint.2018.06.003. Epub 2018 Jun 15.	Castro AL	Forensic Sci Int	2018	2018-07-01			10.1016/j.forsciint.2018.06.003
29963207	Pharmacological evaluation of new constituents of "Spice": synthetic cannabinoids based on indole, indazole, benzimidazole and carbazole scaffolds	Schoeder CT, Hess C, Madea B, Meiler J, Müller CE.	Forensic Toxicol. 2018;36(2):385-403. doi: 10.1007/s11419-018-0415-z. Epub 2018 Apr 26.	Schoeder CT	Forensic Toxicol	2018	2018-07-03	PMC6002460		10.1007/s11419-018-0415-z
29963208	Application of the QuEChERS procedure for analysis of Δ(9)-tetrahydrocannabinol and its metabolites in authentic whole blood samples by GC-MS/MS	Dybowski MP, Dawidowicz AL.	Forensic Toxicol. 2018;36(2):415-423. doi: 10.1007/s11419-018-0419-8. Epub 2018 May 7.	Dybowski MP	Forensic Toxicol	2018	2018-07-03	PMC6002432		10.1007/s11419-018-0419-8
29971694	The effectiveness of decontamination procedures used in forensic hair analysis	Mantinieks D, Gerostamoulos D, Wright P, Drummer O.	Forensic Sci Med Pathol. 2018 Sep;14(3):349-357. doi: 10.1007/s12024-018-9994-6. Epub 2018 Jul 3.	Mantinieks D	Forensic Sci Med Pathol	2018	2018-07-05			10.1007/s12024-018-9994-6
29976400	Tetrahydrocurcumin ameliorates free fatty acid-induced hepatic steatosis and improves insulin resistance in HepG2 cells	Chen JW, Kong ZL, Tsai ML, Lo CY, Ho CT, Lai CS.	J Food Drug Anal. 2018 Jul;26(3):1075-1085. doi: 10.1016/j.jfda.2018.01.005. Epub 2018 Feb 2.	Chen JW	J Food Drug Anal	2018	2018-07-07	PMC9303024		10.1016/j.jfda.2018.01.005
29977030	Magnetic resonance imaging evidence of hippocampal structural changes in patients with primary biliary cholangitis	Mosher VAL, Swain MG, Pang JXQ, Kaplan GG, Sharkey KA, MacQueen GM, Goodyear BG.	Clin Transl Gastroenterol. 2018 Jul 6;9(7):169. doi: 10.1038/s41424-018-0038-z.	Mosher VAL	Clin Transl Gastroenterol	2018	2018-07-07	PMC6033882		10.1038/s41424-018-0038-z
29977078	Composition and Use of Cannabis Extracts for Childhood Epilepsy in the Australian Community	Suraev A, Lintzeris N, Stuart J, Kevin RC, Blackburn R, Richards E, Arnold JC, Ireland C, Todd L, Allsop DJ, McGregor IS.	Sci Rep. 2018 Jul 5;8(1):10154. doi: 10.1038/s41598-018-28127-0.	Suraev A	Sci Rep	2018	2018-07-07	PMC6033872		10.1038/s41598-018-28127-0
29980102	Determination of 12 commonly found compounds in DUID cases in whole blood using fully automated supported liquid extraction and UHPLC-MS/MS	Kristoffersen L, Langødegård M, Gaare KI, Amundsen I, Terland MN, Strand DH.	J Chromatogr B Analyt Technol Biomed Life Sci. 2018 Sep 1;1093-1094:8-23. doi: 10.1016/j.jchromb.2018.06.050. Epub 2018 Jun 25.	Kristoffersen L	J Chromatogr B Analyt Technol Biomed Life Sci	2018	2018-07-07			10.1016/j.jchromb.2018.06.050
29980818	Pharmacokinetics and tolerability of oral cannabis preparations in patients with medication overuse headache (MOH)-a pilot study	Pellesi L, Licata M, Verri P, Vandelli D, Palazzoli F, Marchesi F, Cainazzo MM, Pini LA, Guerzoni S.	Eur J Clin Pharmacol. 2018 Nov;74(11):1427-1436. doi: 10.1007/s00228-018-2516-3. Epub 2018 Jul 6.	Pellesi L	Eur J Clin Pharmacol	2018	2018-07-08			10.1007/s00228-018-2516-3
29981580	The protocol for the Cannabidiol in children with refractory epileptic encephalopathy (CARE-E) study: a phase 1 dosage escalation study	Reithmeier D, Tang-Wai R, Seifert B, Lyon AW, Alcorn J, Acton B, Corley S, Prosser-Loose E, Mousseau DD, Lim HJ, Tellez-Zenteno J, Huh L, Leung E, Carmant L, Huntsman RJ.	BMC Pediatr. 2018 Jul 7;18(1):221. doi: 10.1186/s12887-018-1191-y.	Reithmeier D	BMC Pediatr	2018	2018-07-09	PMC6035794		10.1186/s12887-018-1191-y
29983392	Disturbances of postural sway components in cannabis users	Bolbecker AR, Apthorp D, Martin AS, Tahayori B, Moravec L, Gomez KL, O'Donnell BF, Newman SD, Hetrick WP.	Drug Alcohol Depend. 2018 Sep 1;190:54-61. doi: 10.1016/j.drugalcdep.2018.05.012. Epub 2018 Jun 21.	Bolbecker AR	Drug Alcohol Depend	2018	2018-07-10	PMC7185833	NIHMS1574643	10.1016/j.drugalcdep.2018.05.012
29986021	Increased Burden of Psychiatric Disorders in Inflammatory Bowel Disease	Bernstein CN, Hitchon CA, Walld R, Bolton JM, Sareen J, Walker JR, Graff LA, Patten SB, Singer A, Lix LM, El-Gabalawy R, Katz A, Fisk JD, Marrie RA; CIHR Team in Defining the Burden and Managing the Effects of Psychiatric Comorbidity in Chronic Immunoinflammatory Disease.	Inflamm Bowel Dis. 2019 Jan 10;25(2):360-368. doi: 10.1093/ibd/izy235.	Bernstein CN	Inflamm Bowel Dis	2019	2018-07-10	PMC6391845		10.1093/ibd/izy235
29992186	Development of a Cannabinoid-Based Photoaffinity Probe to Determine the Δ(8/9)-Tetrahydrocannabinol Protein Interaction Landscape in Neuroblastoma Cells	Soethoudt M, Alachouzos G, van Rooden EJ, Moya-Garzón MD, van den Berg RJBHN, Heitman LH, van der Stelt M.	Cannabis Cannabinoid Res. 2018 Jul 1;3(1):136-151. doi: 10.1089/can.2018.0003. eCollection 2018.	Soethoudt M	Cannabis Cannabinoid Res	2018	2018-07-12	PMC6038054		10.1089/can.2018.0003
29996908	Marijuana intoxication in a cat	Janeczek A, Zawadzki M, Szpot P, Niedzwiedz A.	Acta Vet Scand. 2018 Jul 11;60(1):44. doi: 10.1186/s13028-018-0398-0.	Janeczek A	Acta Vet Scand	2018	2018-07-13	PMC6042427		10.1186/s13028-018-0398-0
29997343	Effectiveness of Raw, Natural Medical Cannabis Flower for Treating Insomnia under Naturalistic Conditions	Vigil JM, Stith SS, Diviant JP, Brockelman F, Keeling K, Hall B.	Medicines (Basel). 2018 Jul 11;5(3):75. doi: 10.3390/medicines5030075.	Vigil JM	Medicines (Basel)	2018	2018-07-13	PMC6164964		10.3390/medicines5030075
29998053	Up in smoke: An unusual case of diffuse alveolar hemorrhage from marijuana	Shafi MI, Liaquat S, Auckley D.	Respir Med Case Rep. 2018 Jun 4;25:22-24. doi: 10.1016/j.rmcr.2018.05.028. eCollection 2018.	Shafi MI	Respir Med Case Rep	2018	2018-07-13	PMC6038329		10.1016/j.rmcr.2018.05.028
30000647	Cannabis		2022 Nov 30. Drugs and Lactation Database (LactMed®) [Internet]. Bethesda (MD): National Institute of Child Health and Human Development; 2006–.		Drugs and Lactation Database (LactMed®)	2006	2022-11-30
30001569	The pharmacokinetics and the pharmacodynamics of cannabinoids	Lucas CJ, Galettis P, Schneider J.	Br J Clin Pharmacol. 2018 Nov;84(11):2477-2482. doi: 10.1111/bcp.13710. Epub 2018 Aug 7.	Lucas CJ	Br J Clin Pharmacol	2018	2018-07-13	PMC6177698		10.1111/bcp.13710
30002029	Evidence for THC versus CBD in cannabinoids	Perry D, Ton J, Allan GM.	Can Fam Physician. 2018 Jul;64(7):519.	Perry D	Can Fam Physician	2018	2018-07-14	PMC6042662
30008457	Cardiovascular Disease Prevention in Rheumatoid Arthritis: Compliance with Diabetes Screening Guidelines	Schmidt TJ, Aviña-Zubieta JA, Sayre EC, Abrahamowicz M, Esdaile JM, Lacaille D.	J Rheumatol. 2018 Oct;45(10):1367-1374. doi: 10.3899/jrheum.170973. Epub 2018 Jul 15.	Schmidt TJ	J Rheumatol	2018	2018-07-17			10.3899/jrheum.170973
30013490	Effects of Adolescent THC Exposure on the Prefrontal GABAergic System: Implications for Schizophrenia-Related Psychopathology	Renard J, Rushlow WJ, Laviolette SR.	Front Psychiatry. 2018 Jul 2;9:281. doi: 10.3389/fpsyt.2018.00281. eCollection 2018.	Renard J	Front Psychiatry	2018	2018-07-18	PMC6036125		10.3389/fpsyt.2018.00281
30017927	Dietary values of macroalgae Porphyra haitanensis in Litopenaeus vannamei under normal rearing and WSSV challenge conditions: Effect on growth, immune response and intestinal microbiota	Niu J, Xie SW, Fang HH, Xie JJ, Guo TY, Zhang YM, Liu ZL, Liao SY, He JY, Tian LX, Liu YJ.	Fish Shellfish Immunol. 2018 Oct;81:135-149. doi: 10.1016/j.fsi.2018.06.010. Epub 2018 Jul 12.	Niu J	Fish Shellfish Immunol	2018	2018-07-19			10.1016/j.fsi.2018.06.010
30024443	Tetrahydrocannabinol/Cannabidiol Oromucosal Spray in Patients With Multiple Sclerosis: A Pilot Study on the Plasma Concentration-Effect Relationship	Contin M, Mancinelli L, Perrone A, Sabattini L, Mohamed S, Scandellari C, Foschi M, Vacchiano V, Lugaresi A, Riva R.	Clin Neuropharmacol. 2018 Sep/Oct;41(5):171-176. doi: 10.1097/WNF.0000000000000294.	Contin M	Clin Neuropharmacol	2018	2018-07-20			10.1097/WNF.0000000000000294
30025340	Emission factors of particulate and gaseous compounds from a large cargo vessel operated under real-world conditions	Huang C, Hu Q, Wang H, Qiao L, Jing S, Wang H, Zhou M, Zhu S, Ma Y, Lou S, Li L, Tao S, Li Y, Lou D.	Environ Pollut. 2018 Nov;242(Pt A):667-674. doi: 10.1016/j.envpol.2018.07.036. Epub 2018 Jul 17.	Huang C	Environ Pollut	2018	2018-07-20			10.1016/j.envpol.2018.07.036
30025568	Commercial cannabis consumer products part 2: HPLC-DAD quantitative analysis of cannabis cannabinoids	Ciolino LA, Ranieri TL, Taylor AM.	Forensic Sci Int. 2018 Aug;289:438-447. doi: 10.1016/j.forsciint.2018.05.033. Epub 2018 Jun 30.	Ciolino LA	Forensic Sci Int	2018	2018-07-21			10.1016/j.forsciint.2018.05.033
30026298	Interferon-α-Mediated Activation of T Cells from Healthy and HIV-Infected Individuals Is Suppressed by Δ(9)-Tetrahydrocannabinol	Henriquez JE, Rizzo MD, Crawford RB, Gulick P, Kaminski NE.	J Pharmacol Exp Ther. 2018 Oct;367(1):49-58. doi: 10.1124/jpet.118.250308. Epub 2018 Jul 19.	Henriquez JE	J Pharmacol Exp Ther	2018	2018-07-21	PMC6123667		10.1124/jpet.118.250308
30029166	Made from concentrate? A national web survey assessing dab use in the United States	Sagar KA, Lambros AM, Dahlgren MK, Smith RT, Gruber SA.	Drug Alcohol Depend. 2018 Sep 1;190:133-142. doi: 10.1016/j.drugalcdep.2018.05.022. Epub 2018 Jun 26.	Sagar KA	Drug Alcohol Depend	2018	2018-07-21	PMC9036911	NIHMS1795772	10.1016/j.drugalcdep.2018.05.022
30030940	A rapid method to determine nine natural cannabinoids in beverages and food derived from Cannabis sativa by liquid chromatography coupled to tandem mass spectrometry on a QTRAP 4000	Di Marco Pisciottano I, Guadagnuolo G, Soprano V, De Crescenzo M, Gallo P.	Rapid Commun Mass Spectrom. 2018 Oct 15;32(19):1728-1736. doi: 10.1002/rcm.8242.	Di Marco Pisciottano I	Rapid Commun Mass Spectrom	2018	2018-07-22			10.1002/rcm.8242
30031028	Tolerance to hypothermic and antinoceptive effects of ∆9-tetrahydrocannabinol (THC) vapor inhalation in rats	Nguyen JD, Grant Y, Kerr TM, Gutierrez A, Cole M, Taffe MA.	Pharmacol Biochem Behav. 2018 Sep;172:33-38. doi: 10.1016/j.pbb.2018.07.007. Epub 2018 Jul 19.	Nguyen JD	Pharmacol Biochem Behav	2018	2018-07-22	PMC6713267	NIHMS1046251	10.1016/j.pbb.2018.07.007
30033100	Early Cannabis Use and Neurocognitive Risk: A Prospective Functional Neuroimaging Study	Tervo-Clemmens B, Simmonds D, Calabro FJ, Montez DF, Lekht JA, Day NL, Richardson GA, Luna B.	Biol Psychiatry Cogn Neurosci Neuroimaging. 2018 Aug;3(8):713-725. doi: 10.1016/j.bpsc.2018.05.004. Epub 2018 May 29.	Tervo-Clemmens B	Biol Psychiatry Cogn Neurosci Neuroimaging	2018	2018-07-24	PMC6561344	NIHMS1026259	10.1016/j.bpsc.2018.05.004
30039377	Synthetic cannabinoids are substrates and inhibitors of multiple drug-metabolizing enzymes	Kong TY, Kim JH, Kim DK, Lee HS.	Arch Pharm Res. 2018 Jul;41(7):691-710. doi: 10.1007/s12272-018-1055-x. Epub 2018 Jul 23.	Kong TY	Arch Pharm Res	2018	2018-07-25			10.1007/s12272-018-1055-x
30045017	Selective and Context-Dependent Social and Behavioral Effects of Δ9-Tetrahydrocannabinol in Weakly Electric Fish	Neeley B, Overholt T, Artz E, Kinsey SG, Marsat G.	Brain Behav Evol. 2018;91(4):214-227. doi: 10.1159/000490171. Epub 2018 Jul 25.	Neeley B	Brain Behav Evol	2018	2018-07-26	PMC6446089	NIHMS999027	10.1159/000490171
30046349	Anti-Inflammatory, Antioxidative, and Hepatoprotective Effects of Trans Δ9-Tetrahydrocannabinol/Sesame Oil on Adjuvant-Induced Arthritis in Rats	Ismail M, Hasan H, El-Orfali Y, Ismail H, Khawaja G.	Evid Based Complement Alternat Med. 2018 Jun 25;2018:9365464. doi: 10.1155/2018/9365464. eCollection 2018.	Ismail M	Evid Based Complement Alternat Med	2018	2018-07-27	PMC6036806		10.1155/2018/9365464
30047034	Preparation and Characterization of Tetrahydrocurcumin-Loaded Cellulose Acetate Phthalate/Polyethylene Glycol Electrospun Nanofibers	Rramaswamy R, Mani G, Venkatachalam S, Venkata Yasam R, Rajendran JCB, Hyun Tae J.	AAPS PharmSciTech. 2018 Oct;19(7):3000-3008. doi: 10.1208/s12249-018-1122-0. Epub 2018 Jul 25.	Rramaswamy R	AAPS PharmSciTech	2018	2018-07-27			10.1208/s12249-018-1122-0
30048626	Can toxicokinetics of (synthetic) cannabinoids in pigs after pulmonary administration be upscaled to humans by allometric techniques?	Schaefer N, Wojtyniak JG, Kroell AK, Koerbel C, Laschke MW, Lehr T, Menger MD, Maurer HH, Meyer MR, Schmidt PH.	Biochem Pharmacol. 2018 Sep;155:403-418. doi: 10.1016/j.bcp.2018.07.029. Epub 2018 Jul 24.	Schaefer N	Biochem Pharmacol	2018	2018-07-27			10.1016/j.bcp.2018.07.029
30049223	Effect of Vaporized Cannabis on Exertional Breathlessness and Exercise Endurance in Advanced Chronic Obstructive Pulmonary Disease. A Randomized Controlled Trial	Abdallah SJ, Smith BM, Ware MA, Moore M, Li PZ, Bourbeau J, Jensen D.	Ann Am Thorac Soc. 2018 Oct;15(10):1146-1158. doi: 10.1513/AnnalsATS.201803-198OC.	Abdallah SJ	Ann Am Thorac Soc	2018	2018-07-28			10.1513/AnnalsATS.201803-198OC
30050084	Brain activity of anandamide: a rewarding bliss?	Scherma M, Masia P, Satta V, Fratta W, Fadda P, Tanda G.	Acta Pharmacol Sin. 2019 Mar;40(3):309-323. doi: 10.1038/s41401-018-0075-x. Epub 2018 Jul 26.	Scherma M	Acta Pharmacol Sin	2019	2018-07-28	PMC6460372		10.1038/s41401-018-0075-x
30051617	Safety and efficacy of nabilone for acute chemotherapy-induced vomiting prophylaxis in pediatric patients: A multicenter, retrospective review	Polito S, MacDonald T, Romanick M, Jupp J, Wiernikowski J, Vennettilli A, Khanna M, Patel P, Ning W, Sung L, Dupuis LL.	Pediatr Blood Cancer. 2018 Dec;65(12):e27374. doi: 10.1002/pbc.27374. Epub 2018 Jul 26.	Polito S	Pediatr Blood Cancer	2018	2018-07-28			10.1002/pbc.27374
30052163	Long-Term Heavy Recreational Cannabis Use and Serum Delta-9-Tetrahydrocannabinol Levels are not Associated with an Impaired Liver Function in Cannabis Dependents	Bonnet U, Canbay A, Specka M, Scherbaum N.	J Psychoactive Drugs. 2018 Sep-Oct;50(4):355-360. doi: 10.1080/02791072.2018.1482031. Epub 2018 Jul 27.	Bonnet U	J Psychoactive Drugs	2018	2018-07-28			10.1080/02791072.2018.1482031
30053500	Elucidation of structure-function relationship of THCA and CBDA synthase from Cannabis sativaL	Zirpel B, Kayser O, Stehle F.	J Biotechnol. 2018 Oct 20;284:17-26. doi: 10.1016/j.jbiotec.2018.07.031. Epub 2018 Jul 24.	Zirpel B	J Biotechnol	2018	2018-07-28			10.1016/j.jbiotec.2018.07.031
30068153	Bond dissociation energies of TiC, ZrC, HfC, ThC, NbC, and TaC	Sevy A, Matthew DJ, Morse MD.	J Chem Phys. 2018 Jul 28;149(4):044306. doi: 10.1063/1.5041422.	Sevy A	J Chem Phys	2018	2018-08-03			10.1063/1.5041422
30070591	LC-MS/MS based detection and characterization of covalent glutathione modifications formed by reactive drug of abuse metabolites	Gilliland RA, Möller C, DeCaprio AP.	Xenobiotica. 2019 Jul;49(7):778-790. doi: 10.1080/00498254.2018.1504256. Epub 2018 Sep 28.	Gilliland RA	Xenobiotica	2019	2018-08-03			10.1080/00498254.2018.1504256
30071983	Marijuana and Psychosis: Policy Implications for Treatment Providers	Bagot KS, Chang A.	J Am Acad Child Adolesc Psychiatry. 2018 Aug;57(8):613-614. doi: 10.1016/j.jaac.2018.05.010.	Bagot KS	J Am Acad Child Adolesc Psychiatry	2018	2018-08-04			10.1016/j.jaac.2018.05.010
30074247	Effects of non-euphoric plant cannabinoids on muscle quality and performance of dystrophic mdx mice	Iannotti FA, Pagano E, Moriello AS, Alvino FG, Sorrentino NC, D'Orsi L, Gazzerro E, Capasso R, De Leonibus E, De Petrocellis L, Di Marzo V.	Br J Pharmacol. 2019 May;176(10):1568-1584. doi: 10.1111/bph.14460. Epub 2018 Sep 9.	Iannotti FA	Br J Pharmacol	2019	2018-08-04	PMC6487563		10.1111/bph.14460
30077641	Effect of chronic THC administration in the reproductive organs of male mice, spermatozoa and in vitro fertilization	López-Cardona AP, Ibarra-Lecue I, Laguna-Barraza R, Pérez-Cerezales S, Urigüen L, Agirregoitia N, Gutiérrez-Adán A, Agirregoitia E.	Biochem Pharmacol. 2018 Nov;157:294-303. doi: 10.1016/j.bcp.2018.07.045. Epub 2018 Aug 3.	López-Cardona AP	Biochem Pharmacol	2018	2018-08-06			10.1016/j.bcp.2018.07.045
30077950	Simultaneous quantification of cannabinoids tetrahydrocannabinol, cannabidiol and CB1 receptor antagonist in rat plasma: An application to characterize pharmacokinetics after passive cannabis smoke inhalation and co-administration of rimonabant	Ravula A, Chandasana H, Setlow B, Febo M, Bruijnzeel AW, Derendorf H.	J Pharm Biomed Anal. 2018 Oct 25;160:119-125. doi: 10.1016/j.jpba.2018.07.004. Epub 2018 Jul 19.	Ravula A	J Pharm Biomed Anal	2018	2018-08-06	PMC6397651	NIHMS986737	10.1016/j.jpba.2018.07.004
30080756	Effect of Cannabinoid Receptor Agonists on Isolated Rat Atria	Maggo S, Ashton JC.	J Cardiovasc Pharmacol. 2018 Oct;72(4):191-194. doi: 10.1097/FJC.0000000000000613.	Maggo S	J Cardiovasc Pharmacol	2018	2018-08-07			10.1097/FJC.0000000000000613
30081751	Gas-phase and semivolatile organic emissions from a modern nonroad diesel engine equipped with advanced aftertreatment	Liu ZG, Eckerle WA, Ottinger NA.	J Air Waste Manag Assoc. 2018 Dec;68(12):1333-1345. doi: 10.1080/10962247.2018.1505676. Epub 2018 Oct 8.	Liu ZG	J Air Waste Manag Assoc	2018	2018-08-08			10.1080/10962247.2018.1505676
30086499	Long-term monitoring of drug consumption patterns in a large-sized European city using wastewater-based epidemiology: Comparison of two sampling schemes for the assessment of multiannual trends	Krizman-Matasic I, Senta I, Kostanjevecki P, Ahel M, Terzic S.	Sci Total Environ. 2019 Jan 10;647:474-485. doi: 10.1016/j.scitotenv.2018.07.441. Epub 2018 Aug 1.	Krizman-Matasic I	Sci Total Environ	2019	2018-08-08			10.1016/j.scitotenv.2018.07.441
30092263	Cost-effectiveness of health coaching and financial incentives to promote physical activity after total knee replacement	Smith KC, Paltiel AD, Yang HY, Collins JE, Katz JN, Losina E.	Osteoarthritis Cartilage. 2018 Nov;26(11):1495-1505. doi: 10.1016/j.joca.2018.07.014. Epub 2018 Aug 6.	Smith KC	Osteoarthritis Cartilage	2018	2018-08-10	PMC6202236	NIHMS1505488	10.1016/j.joca.2018.07.014
30096478	Effects of copper on hemocyte parameters in the estuarine oyster Crassostrea rivularis under low pH conditions	Huang X, Jiang X, Sun M, Dupont S, Huang W, Hu M, Li Q, Wang Y.	Aquat Toxicol. 2018 Oct;203:61-68. doi: 10.1016/j.aquatox.2018.08.003. Epub 2018 Aug 2.	Huang X	Aquat Toxicol	2018	2018-08-11			10.1016/j.aquatox.2018.08.003
30109666	The Reduction of Visceral Adipose Tissue after Roux-en-Y Gastric Bypass Is more Pronounced in Patients with Impaired Glucose Metabolism	Favre L, Marino L, Roth A, Acierno J Jr, Hans D, Demartines N, Pitteloud N, Suter M, Collet TH.	Obes Surg. 2018 Dec;28(12):4006-4013. doi: 10.1007/s11695-018-3455-x.	Favre L	Obes Surg	2018	2018-08-16	PMC6223744		10.1007/s11695-018-3455-x
30115765	Cannabinoid disruption of learning mechanisms involved in reward processing	Lupica CR, Hoffman AF.	Learn Mem. 2018 Aug 16;25(9):435-445. doi: 10.1101/lm.046748.117. Print 2018 Sep.	Lupica CR	Learn Mem	2018	2018-08-18	PMC6097761		10.1101/lm.046748.117
30115766	Highway to hell or magic smoke? The dose-dependence of Δ(9)-THC in place conditioning paradigms	Kubilius RA, Kaplick PM, Wotjak CT.	Learn Mem. 2018 Aug 16;25(9):446-454. doi: 10.1101/lm.046870.117. Print 2018 Sep.	Kubilius RA	Learn Mem	2018	2018-08-18	PMC6097764		10.1101/lm.046870.117
30121606	'Adding another spinning plate to an already busy life'. Benefits and risks in patient partner-researcher relationships: a qualitative study of patient partners' experiences in a Canadian health research setting	Leese J, Macdonald G, Kerr S, Gulka L, Hoens AM, Lum W, Tran BC, Townsend AF, Li LC.	BMJ Open. 2018 Aug 17;8(8):e022154. doi: 10.1136/bmjopen-2018-022154.	Leese J	BMJ Open	2018	2018-08-20	PMC6104752		10.1136/bmjopen-2018-022154
30125699	The ethanol extract of honeysuckle stem modulates the innate immunity of Chinese mitten crab Eriocheir sinensis against Aeromonas hydrophila	Zhao Z, Zhang H, Wang M, Zhang C, Kuang P, Zhou Z, Zhang G, Wang Z, Zhang B, Shi X.	Fish Shellfish Immunol. 2018 Nov;82:304-311. doi: 10.1016/j.fsi.2018.08.035. Epub 2018 Aug 18.	Zhao Z	Fish Shellfish Immunol	2018	2018-08-21			10.1016/j.fsi.2018.08.035
30125701	Effects of dietary taurine on growth, non-specific immunity, anti-oxidative properties and gut immunity in the Chinese mitten crab Eriocheir sinensis	Dong J, Cheng R, Yang Y, Zhao Y, Wu G, Zhang R, Zhu X, Li L, Li X.	Fish Shellfish Immunol. 2018 Nov;82:212-219. doi: 10.1016/j.fsi.2018.08.029. Epub 2018 Aug 18.	Dong J	Fish Shellfish Immunol	2018	2018-08-21			10.1016/j.fsi.2018.08.029
30125709	Multi-strain probiotics enhance immune responsiveness and alters metabolic profiles in the New Zealand black-footed abalone (Haliotis iris)	Grandiosa R, Mérien F, Young T, Van Nguyen T, Gutierrez N, Kitundu E, Alfaro AC.	Fish Shellfish Immunol. 2018 Nov;82:330-338. doi: 10.1016/j.fsi.2018.08.034. Epub 2018 Aug 17.	Grandiosa R	Fish Shellfish Immunol	2018	2018-08-21			10.1016/j.fsi.2018.08.034
30130528	Effects of Δ(9)-tetrahydrocannabinol on irinotecan-induced clinical effects in rats	Prester L, Mikolić A, Jurič A, Fuchs N, Neuberg M, Lucić Vrdoljak A, Brčić Karačonji I.	Chem Biol Interact. 2018 Oct 1;294:128-134. doi: 10.1016/j.cbi.2018.08.009. Epub 2018 Aug 18.	Prester L	Chem Biol Interact	2018	2018-08-22			10.1016/j.cbi.2018.08.009
30132506	Cannabinoid receptor 2 agonist attenuates blood‑brain barrier damage in a rat model of intracerebral hemorrhage by activating the Rac1 pathway	Wang Z, Li Y, Cai S, Li R, Cao G.	Int J Mol Med. 2018 Nov;42(5):2914-2922. doi: 10.3892/ijmm.2018.3834. Epub 2018 Aug 22.	Wang Z	Int J Mol Med	2018	2018-08-23			10.3892/ijmm.2018.3834
30134192	Δ9-tetrahydrocannabinol modulates the proteasome system in the brain	Salgado-Mendialdúa V, Aguirre-Plans J, Guney E, Reig-Viader R, Maldonado R, Bayés À, Oliva B, Ozaita A.	Biochem Pharmacol. 2018 Nov;157:159-168. doi: 10.1016/j.bcp.2018.08.026. Epub 2018 Aug 19.	Salgado-Mendialdúa V	Biochem Pharmacol	2018	2018-08-23			10.1016/j.bcp.2018.08.026
30134238	A Survey on the Medical Use of Cannabis in Europe: A Position Paper	Bramness JG, Dom G, Gual A, Mann K, Wurst FM.	Eur Addict Res. 2018;24(4):201-205. doi: 10.1159/000492757. Epub 2018 Aug 22.	Bramness JG	Eur Addict Res	2018	2018-08-23			10.1159/000492757
30137697	Tetrahydrocurcumin, a major metabolite of curcumin, ameliorates allergic airway inflammation by attenuating Th2 response and suppressing the IL-4Rα-Jak1-STAT6 and Jagged1/Jagged2 -Notch1/Notch2 pathways in asthmatic mice	Chen BL, Chen YQ, Ma BH, Yu SF, Li LY, Zeng QX, Zhou YT, Wu YF, Liu WL, Wan JB, Yang Y, Li CW.	Clin Exp Allergy. 2018 Nov;48(11):1494-1508. doi: 10.1111/cea.13258. Epub 2018 Sep 12.	Chen BL	Clin Exp Allergy	2018	2018-08-24			10.1111/cea.13258
30138003	Previous cannabis exposure modulates the acute effects of delta-9-tetrahydrocannabinol on attentional salience and fear processing	Colizzi M, McGuire P, Giampietro V, Williams S, Brammer M, Bhattacharyya S.	Exp Clin Psychopharmacol. 2018 Dec;26(6):582-598. doi: 10.1037/pha0000221. Epub 2018 Aug 23.	Colizzi M	Exp Clin Psychopharmacol	2018	2018-08-24			10.1037/pha0000221
30138822	Untargeted rat brain metabolomics after oral administration of a single high dose of cannabidiol	Citti C, Palazzoli F, Licata M, Vilella A, Leo G, Zoli M, Vandelli MA, Forni F, Pacchetti B, Cannazza G.	J Pharm Biomed Anal. 2018 Nov 30;161:1-11. doi: 10.1016/j.jpba.2018.08.021. Epub 2018 Aug 11.	Citti C	J Pharm Biomed Anal	2018	2018-08-24			10.1016/j.jpba.2018.08.021
30140216	Variability of Multiple Sclerosis Spasticity Symptoms in Response to THC:CBD Oromucosal Spray: Tracking Cases through Clinical Scales and Video Recordings	Flachenecker P, Saccà F, Vila C.	Case Rep Neurol. 2018 Jul 12;10(2):169-176. doi: 10.1159/000490376. eCollection 2018 May-Aug.	Flachenecker P	Case Rep Neurol	2018	2018-08-25	PMC6103374		10.1159/000490376
30144294	Simultaneous quantification of THC-COOH, OH-THC, and further cannabinoids in human hair by gas chromatography-tandem mass spectrometry with electron ionization applying automated sample preparation	Kieliba T, Lerch O, Andresen-Streichert H, Rothschild MA, Beike J.	Drug Test Anal. 2019 Feb;11(2):267-278. doi: 10.1002/dta.2490. Epub 2018 Sep 25.	Kieliba T	Drug Test Anal	2019	2018-08-26			10.1002/dta.2490
30149280	Cannabinoid concentrations in blood and urine after smoking cannabidiol joints	Meier U, Dussy F, Scheurer E, Mercer-Chalmers-Bender K, Hangartner S.	Forensic Sci Int. 2018 Oct;291:62-67. doi: 10.1016/j.forsciint.2018.08.009. Epub 2018 Aug 11.	Meier U	Forensic Sci Int	2018	2018-08-28			10.1016/j.forsciint.2018.08.009
30150212	Marijuana Use by Breastfeeding Mothers and Cannabinoid Concentrations in Breast Milk	Bertrand KA, Hanan NJ, Honerkamp-Smith G, Best BM, Chambers CD.	Pediatrics. 2018 Sep;142(3):e20181076. doi: 10.1542/peds.2018-1076.	Bertrand KA	Pediatrics	2018	2018-08-29	PMC6317767	NIHMS992391	10.1542/peds.2018-1076
30150782	Efavirenz exposure, alone and in combination with known drugs of abuse, engenders addictive-like bio-behavioural changes in rats	Möller M, Fourie J, Harvey BH.	Sci Rep. 2018 Aug 27;8(1):12837. doi: 10.1038/s41598-018-29978-3.	Möller M	Sci Rep	2018	2018-08-29	PMC6110861		10.1038/s41598-018-29978-3
30151725	Astrocytic Mechanisms Involving Kynurenic Acid Control Δ(9)-Tetrahydrocannabinol-Induced Increases in Glutamate Release in Brain Reward-Processing Areas	Secci ME, Mascia P, Sagheddu C, Beggiato S, Melis M, Borelli AC, Tomasini MC, Panlilio LV, Schindler CW, Tanda G, Ferré S, Bradberry CW, Ferraro L, Pistis M, Goldberg SR, Schwarcz R, Justinova Z.	Mol Neurobiol. 2019 May;56(5):3563-3575. doi: 10.1007/s12035-018-1319-y. Epub 2018 Aug 27.	Secci ME	Mol Neurobiol	2019	2018-08-29	PMC6393222	NIHMS1505027	10.1007/s12035-018-1319-y
30152161	Medicinal Properties of Cannabinoids, Terpenes, and Flavonoids in Cannabis, and Benefits in Migraine, Headache, and Pain: An Update on Current Evidence and Cannabis Science	Baron EP.	Headache. 2018 Jul;58(7):1139-1186. doi: 10.1111/head.13345.	Baron EP	Headache	2018	2018-08-29			10.1111/head.13345
30153114	Appearance/Image- and Performance-Enhancing Drug Users: A Forensic Approach	Lusetti M, Licata M, Silingardi E, Bonsignore A, Palmiere C.	Am J Forensic Med Pathol. 2018 Dec;39(4):325-329. doi: 10.1097/PAF.0000000000000424.	Lusetti M	Am J Forensic Med Pathol	2018	2018-08-29			10.1097/PAF.0000000000000424
30156181	Hospital Surge Capacity during Expo 2015 in Milano, Italy	Faccincani R, Della Corte F, Sesana G, Stucchi R, Weinstein E, Ashkenazi I, Ingrassia P.	Prehosp Disaster Med. 2018 Oct;33(5):459-465. doi: 10.1017/S1049023X18000742. Epub 2018 Aug 29.	Faccincani R	Prehosp Disaster Med	2018	2018-08-30			10.1017/S1049023X18000742
30166613	Chemometric Analysis of Cannabinoids: Chemotaxonomy and Domestication Syndrome	Mudge EM, Murch SJ, Brown PN.	Sci Rep. 2018 Aug 30;8(1):13090. doi: 10.1038/s41598-018-31120-2.	Mudge EM	Sci Rep	2018	2018-09-01	PMC6117354		10.1038/s41598-018-31120-2
30167450	Exploring cannabis concentrates on the legal market: User profiles, product strength, and health-related outcomes	Cinnamon Bidwell L, YorkWilliams SL, Mueller RL, Bryan AD, Hutchison KE.	Addict Behav Rep. 2018 Aug 17;8:102-106. doi: 10.1016/j.abrep.2018.08.004. eCollection 2018 Dec.	Cinnamon Bidwell L	Addict Behav Rep	2018	2018-09-01	PMC6111049		10.1016/j.abrep.2018.08.004
30170189	Δ(9)-tetrahydrocannabivarin impairs epithelial calcium transport through inhibition of TRPV5 and TRPV6	Janssens A, Silvestri C, Martella A, Vanoevelen JM, Di Marzo V, Voets T.	Pharmacol Res. 2018 Oct;136:83-89. doi: 10.1016/j.phrs.2018.08.021. Epub 2018 Aug 28.	Janssens A	Pharmacol Res	2018	2018-09-01			10.1016/j.phrs.2018.08.021
30170713	Should Cannabinoids Be Added to Multimodal Pain Regimens After Total Hip and Knee Arthroplasty?	Hickernell TR, Lakra A, Berg A, Cooper HJ, Geller JA, Shah RP.	J Arthroplasty. 2018 Dec;33(12):3637-3641. doi: 10.1016/j.arth.2018.07.027. Epub 2018 Aug 3.	Hickernell TR	J Arthroplasty	2018	2018-09-02			10.1016/j.arth.2018.07.027
30172491	The potential of near infrared spectroscopy to estimate the content of cannabinoids in Cannabis sativa L.: A comparative study	Sánchez-Carnerero Callado C, Núñez-Sánchez N, Casano S, Ferreiro-Vera C.	Talanta. 2018 Dec 1;190:147-157. doi: 10.1016/j.talanta.2018.07.085. Epub 2018 Jul 27.	Sánchez-Carnerero Callado C	Talanta	2018	2018-09-03			10.1016/j.talanta.2018.07.085
30172516	Fast extraction of cannabinoids in marijuana samples by using hard-cap espresso machines	Leiman K, Colomo L, Armenta S, de la Guardia M, Esteve-Turrillas FA.	Talanta. 2018 Dec 1;190:321-326. doi: 10.1016/j.talanta.2018.08.009. Epub 2018 Aug 6.	Leiman K	Talanta	2018	2018-09-03			10.1016/j.talanta.2018.08.009
30173008	A novel capacitive sensor based on molecularly imprinted nanoparticles as recognition elements	Canfarotta F, Czulak J, Guerreiro A, Cruz AG, Piletsky S, Bergdahl GE, Hedström M, Mattiasson B.	Biosens Bioelectron. 2018 Nov 30;120:108-114. doi: 10.1016/j.bios.2018.07.070. Epub 2018 Aug 7.	Canfarotta F	Biosens Bioelectron	2018	2018-09-03			10.1016/j.bios.2018.07.070
30173052	3,4,5-Trihydroxycinnamic acid attenuates lipopolysaccharide (LPS)-induced acute lung injury via downregulating inflammatory molecules and upregulating HO-1/AMPK activation	Lee JW, Chun W, Kwon OK, Park HA, Lim Y, Lee JH, Kim DY, Kim JH, Lee HK, Ryu HW, Oh SR, Ahn KS.	Int Immunopharmacol. 2018 Nov;64:123-130. doi: 10.1016/j.intimp.2018.08.015. Epub 2018 Aug 31.	Lee JW	Int Immunopharmacol	2018	2018-09-03			10.1016/j.intimp.2018.08.015
30176957	Which biological and self-report measures of cannabis use predict cannabis dependency and acute psychotic-like effects?	Curran HV, Hindocha C, Morgan CJA, Shaban N, Das RK, Freeman TP.	Psychol Med. 2019 Jul;49(9):1574-1580. doi: 10.1017/S003329171800226X. Epub 2018 Sep 4.	Curran HV	Psychol Med	2019	2018-09-05	PMC6541869		10.1017/S003329171800226X
30185448	Cannabis analgesia in chronic neuropathic pain is associated with altered brain connectivity	Weizman L, Dayan L, Brill S, Nahman-Averbuch H, Hendler T, Jacob G, Sharon H.	Neurology. 2018 Oct 2;91(14):e1285-e1294. doi: 10.1212/WNL.0000000000006293. Epub 2018 Sep 5.	Weizman L	Neurology	2018	2018-09-07	PMC6177269		10.1212/WNL.0000000000006293
30185793	Individual and combined effects of acute delta-9-tetrahydrocannabinol and cannabidiol on psychotomimetic symptoms and memory function	Morgan CJA, Freeman TP, Hindocha C, Schafer G, Gardner C, Curran HV.	Transl Psychiatry. 2018 Sep 5;8(1):181. doi: 10.1038/s41398-018-0191-x.	Morgan CJA	Transl Psychiatry	2018	2018-09-07	PMC6125482		10.1038/s41398-018-0191-x
30189411	Developing a rapid semi-automated sample preparation with alkaline hydrolysis in a 96-well plate for quantification of 11-nor-Δ9-tetrahydrocannabinol-9-carboxylic acid in urine samples by UHPLC-MS/MS	Müller LD, Opdal MS.	J Pharm Biomed Anal. 2018 Nov 30;161:296-304. doi: 10.1016/j.jpba.2018.08.045. Epub 2018 Aug 23.	Müller LD	J Pharm Biomed Anal	2018	2018-09-07			10.1016/j.jpba.2018.08.045
30191314	Multiplex analysis of genetic polymorphisms within UGT1A9, a gene involved in phase II of Δ(9)-THC metabolism	Schneider JS, Gasse A, Schürenkamp M, Sibbing U, Banken S, Pfeiffer H, Schürenkamp J, Vennemann M.	Int J Legal Med. 2019 Mar;133(2):365-372. doi: 10.1007/s00414-018-1919-0. Epub 2018 Sep 6.	Schneider JS	Int J Legal Med	2019	2018-09-08			10.1007/s00414-018-1919-0
30192276	Older Adults With Unintended Weight Loss: The Role of Appetite Stimulants	Levitt A, OʼNeil J.	Home Healthc Now. 2018 Sep/Oct;36(5):312-318. doi: 10.1097/NHH.0000000000000692.	Levitt A	Home Healthc Now	2018	2018-09-08			10.1097/NHH.0000000000000692
30193411	Can a threshold for 11-nor-9-carboxy-Δ(9) -tetrahydrocannabinol in hair be derived when its respective concentration in blood serum indicates regular use?	Zinka B, Epple S, Schick S, Skopp G, Graw M, Musshoff F.	Drug Test Anal. 2019 Feb;11(2):325-330. doi: 10.1002/dta.2496. Epub 2018 Oct 11.	Zinka B	Drug Test Anal	2019	2018-09-08			10.1002/dta.2496
30193661	Extraction and isolation of cannabinoids from marijuana seizures and characterization by (1)H NMR allied to chemometric tools	de A Leite J, de Oliveira MVL, Conti R, de S Borges W, Rosa TR, Filgueiras PR, Lacerda V Jr, Romão W, Neto ÁC.	Sci Justice. 2018 Sep;58(5):355-365. doi: 10.1016/j.scijus.2018.06.005. Epub 2018 Jun 25.	de A Leite J	Sci Justice	2018	2018-09-09			10.1016/j.scijus.2018.06.005
30193704	Social Factors and Animal Models of Cannabis Use	Hood L.	Int Rev Neurobiol. 2018;140:171-200. doi: 10.1016/bs.irn.2018.07.006. Epub 2018 Aug 17.	Hood L	Int Rev Neurobiol	2018	2018-09-09			10.1016/bs.irn.2018.07.006
30194285	Oxidative cyclization of N-methyl-dopa by a fungal flavoenzyme of the amine oxidase family	Lahham M, Pavkov-Keller T, Fuchs M, Niederhauser J, Chalhoub G, Daniel B, Kroutil W, Gruber K, Macheroux P.	J Biol Chem. 2018 Nov 2;293(44):17021-17032. doi: 10.1074/jbc.RA118.004227. Epub 2018 Sep 7.	Lahham M	J Biol Chem	2018	2018-09-09	PMC6222107		10.1074/jbc.RA118.004227
30194563	Cannabis for the Treatment of Epilepsy: an Update	Gaston TE, Szaflarski JP.	Curr Neurol Neurosci Rep. 2018 Sep 8;18(11):73. doi: 10.1007/s11910-018-0882-y.	Gaston TE	Curr Neurol Neurosci Rep	2018	2018-09-09			10.1007/s11910-018-0882-y
30194918	Cannabidiol skews biased agonism at cannabinoid CB(1) and CB(2) receptors with smaller effect in CB(1)-CB(2) heteroreceptor complexes	Navarro G, Reyes-Resina I, Rivas-Santisteban R, Sánchez de Medina V, Morales P, Casano S, Ferreiro-Vera C, Lillo A, Aguinaga D, Jagerovic N, Nadal X, Franco R.	Biochem Pharmacol. 2018 Nov;157:148-158. doi: 10.1016/j.bcp.2018.08.046. Epub 2018 Sep 6.	Navarro G	Biochem Pharmacol	2018	2018-09-09			10.1016/j.bcp.2018.08.046
30195587	Conditioned gaping produced by high dose Δ(9)-tetrahydracannabinol: Dysregulation of the hypothalamic endocannabinoid system	DeVuono MV, Hrelja KM, Sabaziotis L, Rajna A, Rock EM, Limebeer CL, Mutch DM, Parker LA.	Neuropharmacology. 2018 Oct;141:272-282. doi: 10.1016/j.neuropharm.2018.08.039. Epub 2018 Sep 7.	DeVuono MV	Neuropharmacology	2018	2018-09-10			10.1016/j.neuropharm.2018.08.039
30195911	Molecular characterization and function analysis of a nucleotide excision repair gene Rad23 from Litopenaeus vannamei after Vibrio alginolyticus challenge	Huang D, Qiao XL, Liang QJ, Wei W, Kong JR, Huan Kang CZ, Liu Y, Wang WN.	Fish Shellfish Immunol. 2018 Dec;83:190-204. doi: 10.1016/j.fsi.2018.09.021. Epub 2018 Sep 6.	Huang D	Fish Shellfish Immunol	2018	2018-09-10			10.1016/j.fsi.2018.09.021
30197385	Colorimetric Determination of (Aminoalkyl)indole-containing Synthetic Cannabimimetics	Durmus H, Durmazel S, Üzer A, Gökdere B, Erçag E, Apak R.	Anal Sci. 2018 Dec 10;34(12):1419-1425. doi: 10.2116/analsci.18P305. Epub 2018 Sep 7.	Durmus H	Anal Sci	2018	2018-09-11			10.2116/analsci.18P305
30201982	Super-silent FRET Sensor Enables Live Cell Imaging and Flow Cytometric Stratification of Intracellular Serine Protease Activity in Neutrophils	Craven TH, Avlonitis N, McDonald N, Walton T, Scholefield E, Akram AR, Walsh TS, Haslett C, Bradley M, Dhaliwal K.	Sci Rep. 2018 Sep 10;8(1):13490. doi: 10.1038/s41598-018-31391-9.	Craven TH	Sci Rep	2018	2018-09-12	PMC6131393		10.1038/s41598-018-31391-9
30203892	Aberrant structural-functional coupling in adult cannabis users	Kim DJ, Schnakenberg Martin AM, Shin YW, Jo HJ, Cheng H, Newman SD, Sporns O, Hetrick WP, Calkins E, O'Donnell BF.	Hum Brain Mapp. 2019 Jan;40(1):252-261. doi: 10.1002/hbm.24369. Epub 2018 Sep 11.	Kim DJ	Hum Brain Mapp	2019	2018-09-12	PMC6289814	NIHMS992429	10.1002/hbm.24369
30205181	Cannabis sativa: A comprehensive ethnopharmacological review of a medicinal plant with a long history	Bonini SA, Premoli M, Tambaro S, Kumar A, Maccarinelli G, Memo M, Mastinu A.	J Ethnopharmacol. 2018 Dec 5;227:300-315. doi: 10.1016/j.jep.2018.09.004. Epub 2018 Sep 8.	Bonini SA	J Ethnopharmacol	2018	2018-09-12			10.1016/j.jep.2018.09.004
30205202	Molecular characterization of minichromosome maintenance protein (MCM7) in Scylla paramamosain and its role in white spot syndrome virus and Vibrio alginolyticus infection	Zhu F, Qian X, Wang Z.	Fish Shellfish Immunol. 2018 Dec;83:104-114. doi: 10.1016/j.fsi.2018.09.028. Epub 2018 Sep 8.	Zhu F	Fish Shellfish Immunol	2018	2018-09-12			10.1016/j.fsi.2018.09.028
30208549	Assessment of the oxidative and genotoxic effects of the glyphosate-based herbicide roundup on the freshwater shrimp, Macrobrachium nipponensis	Hong Y, Yang X, Huang Y, Yan G, Cheng Y.	Chemosphere. 2018 Nov;210:896-906. doi: 10.1016/j.chemosphere.2018.07.069. Epub 2018 Jul 17.	Hong Y	Chemosphere	2018	2018-09-14			10.1016/j.chemosphere.2018.07.069
30209152	Oral cannabinoid-rich THC/CBD cannabis extract for secondary prevention of chemotherapy-induced nausea and vomiting: a study protocol for a pilot and definitive randomised double-blind placebo-controlled trial (CannabisCINV)	Mersiades AJ, Tognela A, Haber PS, Stockler M, Lintzeris N, Simes J, McGregor I, Olver I, Allsop DJ, Gedye C, Kirby AC, Morton RL, Fox P, Clarke S, Briscoe K, Aghmesheh M, Wong N, Walsh A, Hahn C, Grimison P.	BMJ Open. 2018 Sep 12;8(9):e020745. doi: 10.1136/bmjopen-2017-020745.	Mersiades AJ	BMJ Open	2018	2018-09-14	PMC6144412		10.1136/bmjopen-2017-020745
30219209	Adolescent Δ(9)-Tetrahydrocannabinol Exposure and Astrocyte-Specific Genetic Vulnerability Converge on Nuclear Factor-κB-Cyclooxygenase-2 Signaling to Impair Memory in Adulthood	Jouroukhin Y, Zhu X, Shevelkin AV, Hasegawa Y, Abazyan B, Saito A, Pevsner J, Kamiya A, Pletnikov MV.	Biol Psychiatry. 2019 Jun 1;85(11):891-903. doi: 10.1016/j.biopsych.2018.07.024. Epub 2018 Aug 16.	Jouroukhin Y	Biol Psychiatry	2019	2018-09-17	PMC6525084	NIHMS1504021	10.1016/j.biopsych.2018.07.024
30219789	Inhibitory effects of cannabidiol on voltage-dependent sodium currents	Ghovanloo MR, Shuart NG, Mezeyova J, Dean RA, Ruben PC, Goodchild SJ.	J Biol Chem. 2018 Oct 26;293(43):16546-16558. doi: 10.1074/jbc.RA118.004929. Epub 2018 Sep 14.	Ghovanloo MR	J Biol Chem	2018	2018-09-17	PMC6204917		10.1074/jbc.RA118.004929
30219794	JUUL and other stealth vaporisers: hiding the habit from parents and teachers	Ramamurthi D, Chau C, Jackler RK.	Tob Control. 2018 Sep 15:tobaccocontrol-2018-054455. doi: 10.1136/tobaccocontrol-2018-054455. Online ahead of print.	Ramamurthi D	Tob Control	2018	2018-09-17			10.1136/tobaccocontrol-2018-054455
30219927	Post-mortem distribution of the synthetic cannabinoid MDMB-CHMICA and its metabolites in a case of combined drug intoxication	Gaunitz F, Lehmann S, Thomas A, Thevis M, Rothschild MA, Mercer-Chalmers-Bender K.	Int J Legal Med. 2018 Nov;132(6):1645-1657. doi: 10.1007/s00414-018-1911-8. Epub 2018 Sep 15.	Gaunitz F	Int J Legal Med	2018	2018-09-17			10.1007/s00414-018-1911-8
30223565	Analysis of Contact Traces of Cannabis by In-Tube Solid-Phase Microextraction Coupled to Nanoliquid Chromatography	Jornet-Martínez N, Ortega-Sierra A, Verdú-Andrés J, Herráez-Hernández R, Campíns-Falcó P.	Molecules. 2018 Sep 15;23(9):2359. doi: 10.3390/molecules23092359.	Jornet-Martínez N	Molecules	2018	2018-09-19	PMC6225310		10.3390/molecules23092359
30225659	Effect of cannabidiolic acid and ∆(9)-tetrahydrocannabinol on carrageenan-induced hyperalgesia and edema in a rodent model of inflammatory pain	Rock EM, Limebeer CL, Parker LA.	Psychopharmacology (Berl). 2018 Nov;235(11):3259-3271. doi: 10.1007/s00213-018-5034-1. Epub 2018 Sep 17.	Rock EM	Psychopharmacology (Berl)	2018	2018-09-19			10.1007/s00213-018-5034-1
30228015	A fatal blood concentration of 5-APB	Krpo M, Luytkis HC, Haneborg AM, Høiseth G.	Forensic Sci Int. 2018 Oct;291:e1-e3. doi: 10.1016/j.forsciint.2018.08.044. Epub 2018 Sep 6.	Krpo M	Forensic Sci Int	2018	2018-09-20			10.1016/j.forsciint.2018.08.044
30229896	Near-fatal Intoxication with the "New" Synthetic Opioid U-47700: The First Reported Case in the Czech Republic	Židková M, Horsley R, Hloch O, Hložek T.	J Forensic Sci. 2019 Mar;64(2):647-650. doi: 10.1111/1556-4029.13903. Epub 2018 Sep 19.	Židková M	J Forensic Sci	2019	2018-09-20			10.1111/1556-4029.13903
30231009	Cannabinoids determination in bronchoalveolar lavages of cannabis smokers with lung disease	Rotolo MC, Pellegrini M, Martucci P, Giacobbe R, De Palma A, Pacifici R, Pichini S, Busardò FP, Bisconti M.	Clin Chem Lab Med. 2019 Mar 26;57(4):498-503. doi: 10.1515/cclm-2018-0426.	Rotolo MC	Clin Chem Lab Med	2019	2018-09-20			10.1515/cclm-2018-0426
30232407	Tinkering with THC-to-CBD ratios in Marijuana	Madras BK.	Neuropsychopharmacology. 2019 Jan;44(1):215-216. doi: 10.1038/s41386-018-0217-3. Epub 2018 Sep 19.	Madras BK	Neuropsychopharmacology	2019	2018-09-21	PMC6235934		10.1038/s41386-018-0217-3
30232681	REM obstructive sleep apnea: risk for adverse health outcomes and novel treatments	Varga AW, Mokhlesi B.	Sleep Breath. 2019 Jun;23(2):413-423. doi: 10.1007/s11325-018-1727-2. Epub 2018 Sep 19.	Varga AW	Sleep Breath	2019	2018-09-21	PMC6424642	NIHMS1507611	10.1007/s11325-018-1727-2
30232874	Structural and Functional Interaction of Δ(9)-Tetrahydrocannabinol with Liver Fatty Acid Binding Protein (FABP1)	Huang H, McIntosh AL, Martin GG, Dangott LJ, Kier AB, Schroeder F.	Biochemistry. 2018 Oct 16;57(41):6027-6042. doi: 10.1021/acs.biochem.8b00744. Epub 2018 Oct 3.	Huang H	Biochemistry	2018	2018-09-21			10.1021/acs.biochem.8b00744
30233233	Cannabinoids and spinal cord stimulation for the treatment of failed back surgery syndrome refractory pain	Mondello E, Quattrone D, Cardia L, Bova G, Mallamace R, Barbagallo AA, Mondello C, Mannucci C, Di Pietro M, Arcoraci V, Calapai G.	J Pain Res. 2018 Sep 6;11:1761-1767. doi: 10.2147/JPR.S166617. eCollection 2018.	Mondello E	J Pain Res	2018	2018-09-21	PMC6134407		10.2147/JPR.S166617
30236118	Acceptance of pharmaceutical cannabis substitution by cannabis using patients with schizophrenia	van Amsterdam J, Vervloet J, de Weert G, Buwalda VJA, Goudriaan AE, van den Brink W.	Harm Reduct J. 2018 Sep 20;15(1):47. doi: 10.1186/s12954-018-0253-7.	van Amsterdam J	Harm Reduct J	2018	2018-09-22	PMC6149068		10.1186/s12954-018-0253-7
30238130	Cannabidiol modulation of antinociceptive tolerance to Δ(9)-tetrahydrocannabinol	Greene NZ, Wiley JL, Yu Z, Clowers BH, Craft RM.	Psychopharmacology (Berl). 2018 Nov;235(11):3289-3302. doi: 10.1007/s00213-018-5036-z. Epub 2018 Sep 20.	Greene NZ	Psychopharmacology (Berl)	2018	2018-09-22	PMC6454895	NIHMS1020425	10.1007/s00213-018-5036-z
30239113	Regional anesthesia with epinephrine-containing lidocaine reduces pericatheter bleeding after tunneled hemodialysis catheter placement	Mutlu IN, Kocak B, Baykara Ulusan M, Ulusan K, Cakir MS, Kilickesmez O.	Hemodial Int. 2019 Jan;23(1):26-32. doi: 10.1111/hdi.12686. Epub 2018 Sep 21.	Mutlu IN	Hemodial Int	2019	2018-09-22			10.1111/hdi.12686
30241377	Development of Validated Methods and Quantification of Curcuminoids and Curcumin Metabolites and Their Pharmacokinetic Study of Oral Administration of Complete Natural Turmeric Formulation (Cureit™) in Human Plasma via UPLC/ESI-Q-TOF-MS Spectrometry	Jude S, Amalraj A, Kunnumakkara AB, Divya C, Löffler BM, Gopi S.	Molecules. 2018 Sep 20;23(10):2415. doi: 10.3390/molecules23102415.	Jude S	Molecules	2018	2018-09-23	PMC6222699		10.3390/molecules23102415
30242979	Suspect and non-target screening workflows to investigate the in vitro and in vivo metabolism of the synthetic cannabinoid 5Cl-THJ-018	Vervliet P, Mortelé O, Gys C, Degreef M, Lanckmans K, Maudens K, Covaci A, van Nuijs ALN, Lai FY.	Drug Test Anal. 2019 Mar;11(3):479-491. doi: 10.1002/dta.2508. Epub 2018 Oct 23.	Vervliet P	Drug Test Anal	2019	2018-09-23			10.1002/dta.2508
30250104	A new ESI-LC/MS approach for comprehensive metabolic profiling of phytocannabinoids in Cannabis	Berman P, Futoran K, Lewitus GM, Mukha D, Benami M, Shlomi T, Meiri D.	Sci Rep. 2018 Sep 24;8(1):14280. doi: 10.1038/s41598-018-32651-4.	Berman P	Sci Rep	2018	2018-09-26	PMC6155167		10.1038/s41598-018-32651-4
30250864	A prospective open-label trial of a CBD/THC cannabis oil in dravet syndrome	McCoy B, Wang L, Zak M, Al-Mehmadi S, Kabir N, Alhadid K, McDonald K, Zhang G, Sharma R, Whitney R, Sinopoli K, Snead OC 3rd.	Ann Clin Transl Neurol. 2018 Aug 1;5(9):1077-1088. doi: 10.1002/acn3.621. eCollection 2018 Sep.	McCoy B	Ann Clin Transl Neurol	2018	2018-09-26	PMC6144444		10.1002/acn3.621
30255720	The dose-dependent psychomotor effects of intravenous delta-9-tetrahydrocannabinol (Δ(9)-THC) in humans	Boggs DL, Cortes-Briones JA, Surti T, Luddy C, Ranganathan M, Cahill JD, Sewell AR, D'Souza DC, Skosnik PD.	J Psychopharmacol. 2018 Dec;32(12):1308-1318. doi: 10.1177/0269881118799953. Epub 2018 Sep 26.	Boggs DL	J Psychopharmacol	2018	2018-09-27			10.1177/0269881118799953
30257440	Epigenetic Effects of Drugs of Abuse	Heinbockel T, Csoka AB.	Int J Environ Res Public Health. 2018 Sep 25;15(10):2098. doi: 10.3390/ijerph15102098.	Heinbockel T	Int J Environ Res Public Health	2018	2018-09-28	PMC6210395		10.3390/ijerph15102098
30258395	Cannabidiol for Treatment of Childhood Epilepsy-A Cross-Sectional Survey	Klotz KA, Schulze-Bonhage A, San Antonio-Arce V, Jacobs J.	Front Neurol. 2018 Sep 7;9:731. doi: 10.3389/fneur.2018.00731. eCollection 2018.	Klotz KA	Front Neurol	2018	2018-09-28	PMC6143823		10.3389/fneur.2018.00731
30259587	Luminescence Vapochromism of a Dynamic Copper Iodide Mesocate	Benito Q, Balogh CM, El Moll H, Gacoin T, Cordier M, Rakhmatullin A, Latouche C, Martineau-Corcos C, Perruchas S.	Chemistry. 2018 Dec 17;24(71):18868-18872. doi: 10.1002/chem.201804377. Epub 2018 Nov 16.	Benito Q	Chemistry	2018	2018-09-28			10.1002/chem.201804377
30262735	Cannabinoid Delivery Systems for Pain and Inflammation Treatment	Bruni N, Della Pepa C, Oliaro-Bosso S, Pessione E, Gastaldi D, Dosio F.	Molecules. 2018 Sep 27;23(10):2478. doi: 10.3390/molecules23102478.	Bruni N	Molecules	2018	2018-09-29	PMC6222489		10.3390/molecules23102478
30272189	Drug screening using the sweat of a fingerprint: lateral flow detection of Δ9-tetrahydrocannabinol, cocaine, opiates and amphetamine	Hudson M, Stuchinskaya T, Ramma S, Patel J, Sievers C, Goetz S, Hines S, Menzies E, Russell DA.	J Anal Toxicol. 2019 Mar 1;43(2):88-95. doi: 10.1093/jat/bky068.	Hudson M	J Anal Toxicol	2019	2018-10-02	PMC6380464		10.1093/jat/bky068
30276695	The effects of ash inside a platinum-based catalyst diesel particulate filter on particle emissions, gaseous emissions, and unregulated emissions	Wang H, Ge Y, Tan J, Hao L, Peng Z, Wang X, Wu L, Li Y, Yang J, Li J, Yang D.	Environ Sci Pollut Res Int. 2018 Nov;25(33):33736-33744. doi: 10.1007/s11356-018-3328-9. Epub 2018 Oct 1.	Wang H	Environ Sci Pollut Res Int	2018	2018-10-03			10.1007/s11356-018-3328-9
30278899	Electrochemical screening of single nucleotide polymorphisms with significantly enhanced discrimination factor by an amplified ratiometric sensor	Dou B, Li J, Jiang B, Yuan R, Xiang Y.	Anal Chim Acta. 2018 Dec 14;1038:166-172. doi: 10.1016/j.aca.2018.07.027. Epub 2018 Jul 12.	Dou B	Anal Chim Acta	2018	2018-10-04			10.1016/j.aca.2018.07.027
30281413	Occupational health and safety in cannabis production: an Australian perspective	Davidson M, Reed S, Oosthuizen J, O'Donnell G, Gaur P, Cross M, Dennis G.	Int J Occup Environ Health. 2018 Jul-Oct;24(3-4):75-85. doi: 10.1080/10773525.2018.1517234. Epub 2018 Oct 3.	Davidson M	Int J Occup Environ Health	2018	2018-10-04	PMC6237171		10.1080/10773525.2018.1517234
30285892	Suppression of lung cancer progression by isoliquiritigenin through its metabolite 2, 4, 2', 4'-Tetrahydroxychalcone	Chen C, Shenoy AK, Padia R, Fang D, Jing Q, Yang P, Su SB, Huang S.	J Exp Clin Cancer Res. 2018 Oct 3;37(1):243. doi: 10.1186/s13046-018-0902-4.	Chen C	J Exp Clin Cancer Res	2018	2018-10-05	PMC6171243		10.1186/s13046-018-0902-4
30286443	Abuse potential assessment of cannabidiol (CBD) in recreational polydrug users: A randomized, double-blind, controlled trial	Schoedel KA, Szeto I, Setnik B, Sellers EM, Levy-Cooperman N, Mills C, Etges T, Sommerville K.	Epilepsy Behav. 2018 Nov;88:162-171. doi: 10.1016/j.yebeh.2018.07.027. Epub 2018 Oct 2.	Schoedel KA	Epilepsy Behav	2018	2018-10-05			10.1016/j.yebeh.2018.07.027
30288203	Endocannabinoids and related N-acylethanolamines: biological activities and metabolism	Tsuboi K, Uyama T, Okamoto Y, Ueda N.	Inflamm Regen. 2018 Oct 1;38:28. doi: 10.1186/s41232-018-0086-5. eCollection 2018.	Tsuboi K	Inflamm Regen	2018	2018-10-06	PMC6166290		10.1186/s41232-018-0086-5
30291940	Effects of acute Δ9-tetrahydrocannabinol on next-day extinction recall is mediated by post-extinction resting-state brain dynamics	Rabinak CA, Peters C, Marusak HA, Ghosh S, Phan KL.	Neuropharmacology. 2018 Dec;143:289-298. doi: 10.1016/j.neuropharm.2018.10.002. Epub 2018 Oct 3.	Rabinak CA	Neuropharmacology	2018	2018-10-07	PMC6269194	NIHMS1509301	10.1016/j.neuropharm.2018.10.002
30292522	A fully automated approach for the analysis of 37 psychoactive substances in raw wastewater based on on-line solid phase extraction-liquid chromatography-tandem mass spectrometry	López-García E, Mastroianni N, Postigo C, Barceló D, López de Alda M.	J Chromatogr A. 2018 Nov 16;1576:80-89. doi: 10.1016/j.chroma.2018.09.038. Epub 2018 Sep 18.	López-García E	J Chromatogr A	2018	2018-10-08			10.1016/j.chroma.2018.09.038
30292729	Association between increased retinal background noise and co-occurrent regular cannabis and alcohol use	Lucas A, Thirion A, Schwan R, Krieg J, Angioi-Duprez K, Laprevote V, Schwitzer T.	Prog Neuropsychopharmacol Biol Psychiatry. 2019 Mar 8;89:335-340. doi: 10.1016/j.pnpbp.2018.10.002. Epub 2018 Oct 5.	Lucas A	Prog Neuropsychopharmacol Biol Psychiatry	2019	2018-10-08			10.1016/j.pnpbp.2018.10.002
30295430	Using Physical Activity Trackers in Arthritis Self-Management: A Qualitative Study of Patient and Rehabilitation Professional Perspectives	Leese J, Macdonald GG, Tran BC, Wong R, Backman CL, Townsend AF, Davis AM, Jones CA, Gromala D, Avina-Zubieta JA, Hoens AM, Li LC.	Arthritis Care Res (Hoboken). 2019 Feb;71(2):227-236. doi: 10.1002/acr.23780.	Leese J	Arthritis Care Res (Hoboken)	2019	2018-10-09			10.1002/acr.23780
30295809	Detection of Drugs in Simultaneously Collected Samples of Oral Fluid and Blood	Bakke E, Høiseth G, Arnestad M, Gjerde H.	J Anal Toxicol. 2019 Apr 1;43(3):228-232. doi: 10.1093/jat/bky079.	Bakke E	J Anal Toxicol	2019	2018-10-09			10.1093/jat/bky079
30296627	Chemical profiling of the street cocktail drug 'nyaope' in South Africa using GC-MS I: Stability studies of components of 'nyaope' in organic solvents	Mthembi PM, Mwenesongole EM, Cole MD.	Forensic Sci Int. 2018 Nov;292:115-124. doi: 10.1016/j.forsciint.2018.08.001. Epub 2018 Aug 9.	Mthembi PM	Forensic Sci Int	2018	2018-10-09			10.1016/j.forsciint.2018.08.001
30297209	TSFM mutations cause a complex hyperkinetic movement disorder with strong relief by cannabinoids	Traschütz A, Hayer SN, Bender B, Schöls L, Biskup S, Synofzik M.	Parkinsonism Relat Disord. 2019 Mar;60:176-178. doi: 10.1016/j.parkreldis.2018.09.031. Epub 2018 Sep 29.	Traschütz A	Parkinsonism Relat Disord	2019	2018-10-10			10.1016/j.parkreldis.2018.09.031
30312630	THC and gabapentin interactions in a mouse neuropathic pain model	Atwal N, Casey SL, Mitchell VA, Vaughan CW.	Neuropharmacology. 2019 Jan;144:115-121. doi: 10.1016/j.neuropharm.2018.10.006. Epub 2018 Oct 9.	Atwal N	Neuropharmacology	2019	2018-10-13			10.1016/j.neuropharm.2018.10.006
30317054	Determination of cannabinoids in hair of CBD rich extracts consumers using gas chromatography with tandem mass spectrometry (GC/MS-MS)	Rodrigues A, Yegles M, Van Elsué N, Schneider S.	Forensic Sci Int. 2018 Nov;292:163-166. doi: 10.1016/j.forsciint.2018.09.015. Epub 2018 Oct 6.	Rodrigues A	Forensic Sci Int	2018	2018-10-15			10.1016/j.forsciint.2018.09.015
30319418	Atypical Pharmacodynamic Properties and Metabolic Profile of the Abused Synthetic Cannabinoid AB-PINACA: Potential Contribution to Pronounced Adverse Effects Relative to Δ(9)-THC	Hutchison RD, Ford BM, Franks LN, Wilson CD, Yarbrough AL, Fujiwara R, Su MK, Fernandez D, James LP, Moran JH, Patton AL, Fantegrossi WE, Radominska-Pandya A, Prather PL.	Front Pharmacol. 2018 Sep 26;9:1084. doi: 10.3389/fphar.2018.01084. eCollection 2018.	Hutchison RD	Front Pharmacol	2018	2018-10-16	PMC6168621		10.3389/fphar.2018.01084
30322873	Pyrimidinyl Biphenylureas Act as Allosteric Modulators to Activate Cannabinoid Receptor 1 and Initiate β-Arrestin-Dependent Responses	Jagla CAD, Scott CE, Tang Y, Qiao C, Mateo-Semidey GE, Yudowski GA, Lu D, Kendall DA.	Mol Pharmacol. 2019 Jan;95(1):1-10. doi: 10.1124/mol.118.112854. Epub 2018 Oct 15.	Jagla CAD	Mol Pharmacol	2019	2018-10-17	PMC6277924		10.1124/mol.118.112854
30326170	Interaction between warfarin and cannabis	Damkier P, Lassen D, Christensen MMH, Madsen KG, Hellfritzsch M, Pottegård A.	Basic Clin Pharmacol Toxicol. 2019 Jan;124(1):28-31. doi: 10.1111/bcpt.13152. Epub 2018 Nov 6.	Damkier P	Basic Clin Pharmacol Toxicol	2019	2018-10-17			10.1111/bcpt.13152
30327619	Marijuana Use and Hypothalamic-Pituitary-Adrenal Axis Functioning in Humans	Cservenka A, Lahanas S, Dotson-Bossert J.	Front Psychiatry. 2018 Oct 1;9:472. doi: 10.3389/fpsyt.2018.00472. eCollection 2018.	Cservenka A	Front Psychiatry	2018	2018-10-18	PMC6174415		10.3389/fpsyt.2018.00472
[truncated: 3,091 more rows]

## Sheet: Scopus, Filtered
PMID	Title	Authors	Source title	Volume	Issue	Page start	Page end	Year	DOI	Abstract	Document Type	Notes	Detection technique	Sample preparation	Sensing layer composition	Concentration range	Selectivity	Limit of detection	Limit of quantification	Detection time	Reusability	Robustness	Body fluid tested	Other
[truncated: 41 more rows]

[truncated: 3 more sheets: Scopus, RAW, Google Scholar, Notes]
